# Supplementary material for: Independent manipulation of histone H3 modifications in individual nucleosomes reveals the contributions of sister histones to transcription
Source: eLife. 2017 Oct 13;6:e30178. doi: 10.7554/eLife.30178 (PMC5677365; doi:10.7554/eLife.30178)
Supplement: Figure 2—source data 1. [file elife-30178-fig2-data1.xlsx]

## Sheet: Sheet1
Related to Figure 2B
	Repeat 1	Repeat 2	Repeat 3
Myc-H3H/H3D	1.40604	1.59693	1.38381
Myc-H3D/H3H	1.20867	1.44854	1.1715
Related to Figure 2E
Glucose
Time point	WT			H3D/H3H
	Repeat 1	Repeat 2	Repeat 3	Repeat 1	Repeat 2	Repeat 3
0	0.05	0.05	0.05	0.05	0.05	0.05
3	0.0899	0.089	0.0877	0.0954	0.1005	0.0993
6	0.1763	0.1867	0.186	0.1633	0.1622	0.1611
9	0.4396	0.4399	0.4386	0.3042	0.2917	0.2962
12	0.7064	0.7393	0.7391	0.5128	0.5031	0.4862
15	2.1664	3.09	2.5	2.0596	1.9714	2.0417
18	3.6176	3.732	3.772	3.406	3.368	3.2734
21	3.9212	3.5694	3.9668	3.7928	3.6878	3.9382
24	3.778	3.4432	3.9568	4.046	3.913	3.5036
30	3.8371	3.5594	4.0886	3.9353	3.7179	4.2158
36	3.5978	3.7784	3.4506	3.2376	3.7634	3.4264
42	3.3684	3.8844	3.693	3.854	3.8382	3.155
48	3.4922	3.9316	3.211	3.4676	3.274	3.6462
Raffinose
Time point	WT			H3D/H3H
	Repeat 1	Repeat 2	Repeat 3	Repeat 1	Repeat 2	Repeat 3
0	0.05	0.05	0.05	0.05	0.05	0.05
3	0.0489	0.0476	0.0491	0.0543	0.0532	0.0546
6	0.1118	0.1094	0.112	0.0981	0.0973	0.099
9	0.2357	0.224	0.2268	0.1443	0.1348	0.143
12	0.2949	0.2886	0.296	0.1579	0.1454	0.1561
15	0.5631	0.5472	0.5547	0.2697	0.2534	0.2718
18	0.8061	0.7854	0.8051	0.3862	0.3891	0.394
21	1.4372	1.3242	1.4268	0.5448	0.5632	0.5429
24	1.4394	1.5208	1.4864	0.7019	0.7128	0.7233
30	1.738	1.7308	1.7346	0.8328	0.8416	0.8031
36	1.986	1.9954	2.0312	1.1418	1.2736	1.3218
42	2.2078	2.2288	2.1634	1.4518	1.3628	1.3244
48	2.1044	2.2432	2.3162	1.8614	1.6636	1.7698
60	2.1132	2.1078	2.2896	2.1345	2.1154	2.0038
Galactose
Time point	WT			H3D/H3H
	Repeat 1	Repeat 2	Repeat 3	Repeat 1	Repeat 2	Repeat 3
0	0.05	0.05	0.05	0.05	0.05	0.05
3	0.0764	0.0753	0.0768	0.0744	0.073	0.0733
6	0.1197	0.1173	0.1181	0.0874	0.0847	0.0847
9	0.2083	0.2242	0.2204	0.0977	0.0975	0.0923
12	0.3359	0.3518	0.3508	0.1395	0.1214	0.109
15	0.651	0.7353	0.6376	0.4612	0.3532	0.3477
18	1.1493	1.1703	1.3172	0.5949	0.5789	0.447
21	1.179	1.2278	1.76	0.547	0.5526	0.5354
24	2.1894	2.1579	2.2004	1.0676	0.9749	1.1828
30	2.8411	2.6208	2.1288	2.2651	2.6574	2.1468
36	2.4422	2.7152	2.1148	2.0704	2.9172	2.8648
42	2.4362	2.0572	1.8996	2.0164	1.765	2.45
48	2.2681	2.28	2.4	2.2442	1.8546	2.0986
Glycerol
Time point	WT			H3D/H3H
	Repeat 1	Repeat 2	Repeat 3	Repeat 1	Repeat 2	Repeat 3
0	0.05	0.05	0.05	0.05	0.05	0.05
3	0.0577	0.0623	0.0596	0.0558	0.0534	0.0524
6	0.0954	0.0982	0.0951	0.0671	0.0665	0.0637
9	0.1547	0.1612	0.1626	0.0802	0.0719	0.0678
12	0.2573	0.2538	0.2523	0.1001	0.0783	0.0699
15	1.0342	1.0402	1.0253	0.4041	0.2277	0.1819
18	1.408	1.4541	1.4446	0.3158	0.2298	0.1887
21	1.9428	2.0026	1.9687	0.3715	0.2367	0.1964
24	2.104	2.2056	2.1774	0.45	0.246	0.21
30	3.3246	3.3676	3.1756	0.556	0.4064	0.2948
36	3.3698	3.0732	3.4116	0.5644	0.452	0.2962
42	3.0166	3.0692	2.8004	0.5605	0.3009	0.242
48	2.9888	3.2154	3.0412	0.4068	0.4414	0.336
