# Supplementary material for: Independent manipulation of histone H3 modifications in individual nucleosomes reveals the contributions of sister histones to transcription
Source: eLife. 2017 Oct 13;6:e30178. doi: 10.7554/eLife.30178 (PMC5677365; doi:10.7554/eLife.30178)
Supplement: Figure 2—source data 2. [file elife-30178-fig2-data2.xlsx]

## Sheet: differentially expressed genes
test_id	gene_id	gene	locus	sample_1	sample_2	status	value_1	value_2	log2(fold_change)	test_stat	p_value	q_value
XLOC_000664	XLOC_000664	YCL026C-A	chrIII:74703-75285	WT	H3D_H3H	OK	1276.16	21.3778	-5.89955	-11.2733	5e-05	0.000349444
XLOC_006337	XLOC_006337	YPL171C	chrXVI:226168-227371	WT	H3D_H3H	OK	1586.32	27.6353	-5.84302	-17.7982	5e-05	0.000349444
XLOC_001863	XLOC_001863	YEL021W	chrV:116166-116970	WT	H3D_H3H	OK	2597.8	50.5693	-5.68288	-17.5361	5e-05	0.000349444
XLOC_002226	XLOC_002226	YFL057C	chrVI:14304-14763	WT	H3D_H3H	OK	2294.74	51.3531	-5.48174	-12.6431	5e-05	0.000349444
XLOC_002227	XLOC_002227	YFL056C	chrVI:14792-15431	WT	H3D_H3H	OK	1706.61	43.2888	-5.30099	-14.0712	5e-05	0.000349444
XLOC_001148	XLOC_001148	YDL243C	chrIV:17576-18566	WT	H3D_H3H	OK	2637.14	68.2032	-5.27299	-18.5797	5e-05	0.000349444
XLOC_004210	XLOC_004210	YLL060C	chrXII:21137-21839	WT	H3D_H3H	OK	2356.81	67.1971	-5.13229	-16.6575	5e-05	0.000349444
XLOC_003666	XLOC_003666	YKL071W	chrXI:305113-305884	WT	H3D_H3H	OK	2628.17	74.9755	-5.13149	-17.1831	5e-05	0.000349444
XLOC_004623	XLOC_004623	YMR090W	chrXIII:449244-449928	WT	H3D_H3H	OK	2639.52	108.35	-4.60651	-16.2691	5e-05	0.000349444
XLOC_000391	XLOC_000391	YBR008C	chrII:252562-254209	WT	H3D_H3H	OK	1230.8	54.1638	-4.50612	-17.1423	5e-05	0.000349444
XLOC_003744	XLOC_003744	YKR076W	chrXI:582282-583395	WT	H3D_H3H	OK	2193.47	111.225	-4.30166	-17.1247	5e-05	0.000349444
XLOC_004501	XLOC_004501	YML131W	chrXIII:10197-11295	WT	H3D_H3H	OK	2148.38	110.126	-4.28602	-16.907	5e-05	0.000349444
XLOC_002172	XLOC_002172	YFL030W	chrVI:76830-77988	WT	H3D_H3H	OK	428.542	23.3162	-4.20003	-11.5957	5e-05	0.000349444
XLOC_005795	XLOC_005795	YOL052C-A	chrXV:231569-231755	WT	H3D_H3H	OK	5018.91	273.331	-4.19865	-6.77311	5e-05	0.000349444
XLOC_000663	XLOC_000663	YCL026C-B	chrIII:73404-73986	WT	H3D_H3H	OK	842.813	48.1102	-4.1308	-10.783	5e-05	0.000349444
XLOC_000205	XLOC_000205	YBR072W	chrII:382029-382674	WT	H3D_H3H	OK	2984.09	175.45	-4.08816	-15.5776	5e-05	0.000349444
XLOC_000756	XLOC_000756	YDL218W	chrIV:66492-67446	WT	H3D_H3H	OK	315.898	18.7275	-4.07623	-9.57642	5e-05	0.000349444
XLOC_003151	XLOC_003151	YHR136C	chrVIII:374653-375100	WT	H3D_H3H	OK	236.593	14.6389	-4.01453	-5.30786	0.00035	0.00201748
XLOC_003655	XLOC_003655	YKL086W	chrXI:278280-278664	WT	H3D_H3H	OK	1510.71	98.6575	-3.93665	-10.1212	5e-05	0.000349444
XLOC_004507	XLOC_004507	YML116W	chrXIII:38195-39824	WT	H3D_H3H	OK	592.97	41.4145	-3.83975	-14.0048	5e-05	0.000349444
XLOC_001319	XLOC_001319	YDR070C	chrIV:588097-588379	WT	H3D_H3H	OK	692.536	52.2401	-3.72866	-5.30981	0.00015	0.000946235
XLOC_004492	XLOC_004492	YLR460C	chrXII:1059756-1060887	WT	H3D_H3H	OK	301.812	22.8258	-3.72491	-10.0658	5e-05	0.000349444
XLOC_001568	XLOC_001568	YDR533C	chrIV:1501446-1502160	WT	H3D_H3H	OK	2824.1	229.991	-3.61814	-14.8688	5e-05	0.000349444
XLOC_005744	XLOC_005744	YOL150C	chrXV:43693-44784	WT	H3D_H3H	OK	1881.62	171.36	-3.45687	-4.46976	5e-05	0.000349444
XLOC_003043	XLOC_003043	YHR216W	chrVIII:554395-555967	WT	H3D_H3H	OK	1245.76	118.537	-3.39362	-14.4003	5e-05	0.000349444
XLOC_004215	XLOC_004215	YLL052C,YLL053C	chrXII:35502-36361	WT	H3D_H3H	OK	2282.31	233.561	-3.28862	-11.9553	5e-05	0.000349444
XLOC_003313	XLOC_003313	YJR010W	chrX:456238-457774	WT	H3D_H3H	OK	530.934	56.5779	-3.23022	-12.4195	5e-05	0.000349444
XLOC_005213	XLOC_005213	YNR034W-A	chrXIV:692560-692857	WT	H3D_H3H	OK	1155.51	127.649	-3.17828	-7.02194	5e-05	0.000349444
XLOC_005329	XLOC_005329	YNL134C	chrXIV:372450-373581	WT	H3D_H3H	OK	2902.72	323.548	-3.16535	-13.216	5e-05	0.000349444
XLOC_000738	XLOC_000738	YCR102C	chrIII:304360-305467	WT	H3D_H3H	OK	141.929	16.0717	-3.14257	-7.40141	5e-05	0.000349444
XLOC_005441	XLOC_005441	YOL151W	chrXV:43693-44784	WT	H3D_H3H	OK	1906.47	217.178	-3.13395	-12.7996	5e-05	0.000349444
XLOC_002574	XLOC_002574	YGR256W	chrVII:1004623-1006102	WT	H3D_H3H	OK	202.815	23.1482	-3.13119	-9.503	5e-05	0.000349444
XLOC_003133	XLOC_003133	YHR092C	chrVIII:287080-288811	WT	H3D_H3H	OK	476.113	54.7657	-3.11996	-12.0316	5e-05	0.000349444
XLOC_003935	XLOC_003935	YLL055W	chrXII:30108-31704	WT	H3D_H3H	OK	262.895	31.6748	-3.05308	-10.2449	5e-05	0.000349444
XLOC_001674	XLOC_001674	YIR017W-A	chrIX:383555-384165	WT	H3D_H3H	OK	182.62	22.2677	-3.03582	-5.44667	5e-05	0.000349444
XLOC_002926	XLOC_002926	YHR048W	chrVIII:204606-206151	WT	H3D_H3H	OK	200.676	24.4977	-3.03415	-9.23717	5e-05	0.000349444
XLOC_002297	XLOC_002297	YGL255W	chrVII:20977-22108	WT	H3D_H3H	OK	989.085	126.74	-2.96422	-12.3402	5e-05	0.000349444
XLOC_004629	XLOC_004629	YMR107W	chrXIII:483013-483361	WT	H3D_H3H	OK	298.365	39.2996	-2.92449	-4.51512	5e-05	0.000349444
XLOC_005879	XLOC_005879	YOR121C	chrXV:551113-552103	WT	H3D_H3H	OK	838.964	110.998	-2.91807	-3.726	0.00015	0.000946235
XLOC_004761	XLOC_004761	YML123C	chrXIII:24036-25800	WT	H3D_H3H	OK	1196.84	159.117	-2.91107	-12.777	5e-05	0.000349444
XLOC_005592	XLOC_005592	YOR120W	chrXV:551113-552103	WT	H3D_H3H	OK	730.132	97.9713	-2.89773	-10.3978	5e-05	0.000349444
XLOC_003827	XLOC_003827	YKL103C	chrXI:246137-247682	WT	H3D_H3H	OK	1244.52	168.023	-2.88886	-12.6513	5e-05	0.000349444
XLOC_002784	XLOC_002784	YGR154C	chrVII:796797-797868	WT	H3D_H3H	OK	260.717	35.3581	-2.88237	-8.69619	5e-05	0.000349444
XLOC_004310	XLOC_004310	YLR108C	chrXII:366666-368124	WT	H3D_H3H	OK	177.004	24.0554	-2.87935	-8.62576	5e-05	0.000349444
XLOC_004626	XLOC_004626	YMR096W	chrXIII:458407-459301	WT	H3D_H3H	OK	2224.97	306.318	-2.86068	-12.5882	5e-05	0.000349444
XLOC_003642	XLOC_003642	YKL107W	chrXI:236140-237070	WT	H3D_H3H	OK	119.318	16.4602	-2.85776	-6.2672	5e-05	0.000349444
XLOC_000829	XLOC_000829	YDL085W	chrIV:303210-304848	WT	H3D_H3H	OK	50.9023	7.10917	-2.83998	-5.78624	5e-05	0.000349444
XLOC_002709	XLOC_002709	YGL009C	chrVII:476312-478652	WT	H3D_H3H	OK	1036.24	149.794	-2.79031	-12.2457	5e-05	0.000349444
XLOC_000197	XLOC_000197	YBR047W	chrII:331832-332360	WT	H3D_H3H	OK	342.284	50.42	-2.76312	-6.49214	5e-05	0.000349444
XLOC_005428	XLOC_005428	YNR074C	chrXIV:777601-778738	WT	H3D_H3H	OK	554.038	82.2598	-2.75173	-10.5377	5e-05	0.000349444
XLOC_000693	XLOC_000693	YCR021C	chrIII:156108-157107	WT	H3D_H3H	OK	1011.23	152.188	-2.73219	-11.4327	5e-05	0.000349444
XLOC_000556	XLOC_000556	YBR296C	chrII:796797-798522	WT	H3D_H3H	OK	111.96	17.2081	-2.70181	-7.52022	5e-05	0.000349444
XLOC_006297	XLOC_006297	YPL250C	chrXVI:74308-74719	WT	H3D_H3H	OK	725.084	111.652	-2.69914	-7.31838	5e-05	0.000349444
XLOC_002466	XLOC_002466	YGR055W	chrVII:599416-601141	WT	H3D_H3H	OK	806.624	125.207	-2.68757	-11.7692	5e-05	0.000349444
XLOC_000176	XLOC_000176	YBL005W-B	chrII:221329-226598	WT	H3D_H3H	OK	9.57779	1.49694	-2.67768	-4.48246	0.0001	0.000669829
XLOC_002734	XLOC_002734	YGR043C	chrVII:580434-581436	WT	H3D_H3H	OK	348.118	54.6267	-2.6719	-9.12877	5e-05	0.000349444
XLOC_005940	XLOC_005940	YOR226C	chrXV:761391-762084	WT	H3D_H3H	OK	1162.4	184.307	-2.65693	-8.82348	5e-05	0.000349444
XLOC_002371	XLOC_002371	YGL117W	chrVII:288511-289309	WT	H3D_H3H	OK	663.244	105.846	-2.64757	-9.74364	5e-05	0.000349444
XLOC_000762	XLOC_000762	YDL204W	chrIV:94604-95786	WT	H3D_H3H	OK	286.918	46.3656	-2.62951	-9.0236	5e-05	0.000349444
XLOC_005615	XLOC_005615	YOR173W	chrXV:657263-658325	WT	H3D_H3H	OK	227.524	37.5654	-2.59854	-8.05335	5e-05	0.000349444
XLOC_003095	XLOC_003095	YHR029C	chrVIII:167676-168561	WT	H3D_H3H	OK	555.593	94.6986	-2.55261	-9.43136	5e-05	0.000349444
XLOC_000450	XLOC_000450	YBR093C	chrII:429547-430951	WT	H3D_H3H	OK	593.615	101.324	-2.55055	-10.733	5e-05	0.000349444
XLOC_002625	XLOC_002625	YGL184C	chrVII:154614-156012	WT	H3D_H3H	OK	115.35	19.6995	-2.54979	-6.95436	5e-05	0.000349444
XLOC_006512	XLOC_006512	YPR167C	chrXVI:876846-877632	WT	H3D_H3H	OK	488.849	84.4429	-2.53334	-8.88983	5e-05	0.000349444
XLOC_005640	XLOC_005640	YOR225W	chrXV:761391-762084	WT	H3D_H3H	OK	630.651	109.277	-2.52885	-4.14993	5e-05	0.000349444
XLOC_003636	XLOC_003636	YKL120W	chrXI:217343-218318	WT	H3D_H3H	OK	576.784	100.524	-2.52049	-9.71425	5e-05	0.000349444
XLOC_006027	XLOC_006027	YPL274W	chrXVI:22937-24701	WT	H3D_H3H	OK	391.141	68.7476	-2.50831	-10.178	5e-05	0.000349444
XLOC_004665	XLOC_004665	YMR173W,YMR173W-A	chrXIII:608688-610081	WT	H3D_H3H	OK	2579.98	456.479	-2.49874	-10.9761	5e-05	0.000349444
XLOC_003180	XLOC_003180	YHR199C	chrVIII:497489-498422	WT	H3D_H3H	OK	742.398	134.288	-2.46686	-10.1953	5e-05	0.000349444
XLOC_001519	XLOC_001519	YDR453C	chrIV:1365071-1365662	WT	H3D_H3H	OK	657.291	119.181	-2.46338	-8.30068	5e-05	0.000349444
XLOC_001942	XLOC_001942	YER103W	chrV:364588-366517	WT	H3D_H3H	OK	344.718	63.0958	-2.4498	-10.2286	5e-05	0.000349444
XLOC_006528	XLOC_006528	YPR200C	chrXVI:939278-939671	WT	H3D_H3H	OK	185.769	34.0724	-2.44683	-3.75928	0.0003	0.00175994
XLOC_002881	XLOC_002881	YHL036W	chrVIII:26240-27881	WT	H3D_H3H	OK	96.18	17.716	-2.44069	-6.6389	5e-05	0.000349444
XLOC_000782	XLOC_000782	YDL168W	chrIV:159603-160764	WT	H3D_H3H	OK	1282.34	242.916	-2.40025	-10.72	5e-05	0.000349444
XLOC_005852	XLOC_005852	YOR058C	chrXV:433687-436345	WT	H3D_H3H	OK	196.469	37.5512	-2.38737	-9.53634	5e-05	0.000349444
XLOC_000775	XLOC_000775	YDL181W	chrIV:135178-135436	WT	H3D_H3H	OK	1304.21	249.897	-2.38377	-5.71454	5e-05	0.000349444
XLOC_003462	XLOC_003462	YJL101C	chrX:234319-236356	WT	H3D_H3H	OK	475.555	91.2749	-2.38132	-10.3948	5e-05	0.000349444
XLOC_005425	XLOC_005425	YNR069C	chrXIV:761122-762592	WT	H3D_H3H	OK	66.1929	12.7609	-2.37494	-5.61694	5e-05	0.000349444
XLOC_004757	XLOC_004757	YML128C	chrXIII:15134-16676	WT	H3D_H3H	OK	515.579	100.055	-2.3654	-10.0983	5e-05	0.000349444
XLOC_003152	XLOC_003152	YHR137C-A	chrVIII:375708-377250	WT	H3D_H3H	OK	102.946	20.4095	-2.33457	-3.16013	0.00065	0.00343478
XLOC_002178	XLOC_002178	YFL014W	chrVI:107255-107585	WT	H3D_H3H	OK	3810.35	763.698	-2.31885	-9.52643	5e-05	0.000349444
XLOC_001062	XLOC_001062	YDR380W	chrIV:1234217-1236125	WT	H3D_H3H	OK	171.086	34.5411	-2.30833	-8.18823	5e-05	0.000349444
XLOC_006279	XLOC_006279	YPR201W	chrXVI:939921-941136	WT	H3D_H3H	OK	91.9893	19.8276	-2.21395	-5.47033	5e-05	0.000349444
XLOC_000639	XLOC_000639	YCR107W	chrIII:313889-314981	WT	H3D_H3H	OK	115.575	24.9324	-2.21274	-5.91474	5e-05	0.000349444
XLOC_002480	XLOC_002480	YGR088W	chrVII:654633-656322	WT	H3D_H3H	OK	182.489	39.4232	-2.21069	-8.01111	5e-05	0.000349444
XLOC_004871	XLOC_004871	YMR095C	chrXIII:457284-457959	WT	H3D_H3H	OK	575.107	125.012	-2.20176	-7.92667	5e-05	0.000349444
XLOC_002374	XLOC_002374	YGL114W	chrVII:293459-295637	WT	H3D_H3H	OK	376.646	82.7016	-2.18722	-9.51481	5e-05	0.000349444
XLOC_004715	XLOC_004715	YMR250W	chrXIII:770800-772558	WT	H3D_H3H	OK	377.066	83.1472	-2.18108	-9.22744	5e-05	0.000349444
XLOC_002569	XLOC_002569	YGR248W	chrVII:985971-986739	WT	H3D_H3H	OK	410.533	91.5577	-2.16474	-7.65837	5e-05	0.000349444
XLOC_005424	XLOC_005424	YNR068C	chrXIV:760066-760885	WT	H3D_H3H	OK	94.1907	21.1683	-2.15368	-4.53593	5e-05	0.000349444
XLOC_005760	XLOC_005760	YOL119C	chrXV:94855-96361	WT	H3D_H3H	OK	483.038	110.954	-2.12218	-9.10461	5e-05	0.000349444
XLOC_006276	XLOC_006276	YPR192W	chrXVI:921859-922777	WT	H3D_H3H	OK	104.406	24.6436	-2.08291	-4.99397	5e-05	0.000349444
XLOC_002985	XLOC_002985	YHR137W	chrVIII:375708-377250	WT	H3D_H3H	OK	65.4654	15.4541	-2.08275	-4.47805	5e-05	0.000349444
XLOC_000200	XLOC_000200	YBR054W	chrII:343100-344135	WT	H3D_H3H	OK	2134.34	504.314	-2.0814	-9.52581	5e-05	0.000349444
XLOC_000856	XLOC_000856	YDL021W	chrIV:413952-414888	WT	H3D_H3H	OK	256.413	61.0608	-2.07015	-6.99856	5e-05	0.000349444
XLOC_001055	XLOC_001055	YDR368W	chrIV:1213903-1214842	WT	H3D_H3H	OK	817.929	195.767	-2.06284	-8.83443	5e-05	0.000349444
XLOC_003912	XLOC_003912	YKR071C	chrXI:574933-575980	WT	H3D_H3H	OK	1009.13	241.904	-2.06061	-9.1423	5e-05	0.000349444
XLOC_001592	XLOC_001592	YIL136W	chrIX:93618-94800	WT	H3D_H3H	OK	426.709	102.601	-2.0562	-8.73924	5e-05	0.000349444
XLOC_002090	XLOC_002090	YER091C	chrV:339863-342167	WT	H3D_H3H	OK	676.002	163.726	-2.04574	-9.332	5e-05	0.000349444
XLOC_001745	XLOC_001745	YIL074C	chrIX:221080-222490	WT	H3D_H3H	OK	472.745	116.147	-2.02511	-8.63664	5e-05	0.000349444
XLOC_002655	XLOC_002655	YGL121C	chrVII:280776-281157	WT	H3D_H3H	OK	1061.79	262.892	-2.01395	-6.81832	5e-05	0.000349444
XLOC_003740	XLOC_003740	YKR069W	chrXI:571611-573393	WT	H3D_H3H	OK	141.654	35.6465	-1.99054	-7.13514	5e-05	0.000349444
XLOC_001160	XLOC_001160	YDL222C	chrIV:60871-61801	WT	H3D_H3H	OK	193.043	49.1344	-1.97412	-6.09354	5e-05	0.000349444
XLOC_004422	XLOC_004422	YLR312C	chrXII:757636-758833	WT	H3D_H3H	OK	54.7595	13.9852	-1.96921	-4.2772	5e-05	0.000349444
XLOC_005266	XLOC_005266	YNL260C	chrXIV:156858-157455	WT	H3D_H3H	OK	352.088	89.9327	-1.96902	-5.9603	5e-05	0.000349444
XLOC_004108	XLOC_004108	YLR303W	chrXII:732190-733876	WT	H3D_H3H	OK	3290.66	843.415	-1.96406	-7.91797	5e-05	0.000349444
XLOC_000315	XLOC_000315	YBR285W	chrII:773921-774356	WT	H3D_H3H	OK	148.293	38.0328	-1.96314	-3.38302	0.00015	0.000946235
XLOC_005718	XLOC_005718	YOR374W	chrXV:1039839-1041399	WT	H3D_H3H	OK	657.487	168.85	-1.96122	-8.84421	5e-05	0.000349444
XLOC_005489	XLOC_005489	YOL058W	chrXV:219210-220473	WT	H3D_H3H	OK	2151.25	557.652	-1.94774	-8.60585	5e-05	0.000349444
XLOC_003457	XLOC_003457	YJL116C	chrX:193859-194873	WT	H3D_H3H	OK	189.255	49.0873	-1.94691	-6.23786	5e-05	0.000349444
XLOC_000417	XLOC_000417	YBR050C	chrII:337182-338338	WT	H3D_H3H	OK	50.203	13.0662	-1.94193	-3.68187	5e-05	0.000349444
XLOC_003083	XLOC_003083	YHR008C	chrVIII:122888-123590	WT	H3D_H3H	OK	2826.99	737.497	-1.93856	-8.79164	5e-05	0.000349444
XLOC_000356	XLOC_000356	YBL064C	chrII:100370-101156	WT	H3D_H3H	OK	1251.4	327.947	-1.93201	-8.54127	5e-05	0.000349444
XLOC_003033	XLOC_003033	YHR208W	chrVIII:517531-518713	WT	H3D_H3H	OK	1252.33	329.648	-1.92562	-8.79178	5e-05	0.000349444
XLOC_001967	XLOC_001967	YER150W	chrV:468369-468816	WT	H3D_H3H	OK	1031.08	273.471	-1.9147	-7.0375	5e-05	0.000349444
XLOC_005675	XLOC_005675	YOR289W	chrXV:853356-854112	WT	H3D_H3H	OK	299.544	79.6139	-1.91168	-6.30598	5e-05	0.000349444
XLOC_001901	XLOC_001901	YER037W	chrV:225888-226854	WT	H3D_H3H	OK	580.456	154.475	-1.90981	-7.8924	5e-05	0.000349444
XLOC_006501	XLOC_006501	YPR151C	chrXVI:830998-831675	WT	H3D_H3H	OK	209.047	55.7662	-1.90636	-5.10681	5e-05	0.000349444
XLOC_003803	XLOC_003803	YKL151C	chrXI:164916-165930	WT	H3D_H3H	OK	480.733	129.283	-1.8947	-7.85022	5e-05	0.000349444
XLOC_001355	XLOC_001355	YDR135C	chrIV:723003-727551	WT	H3D_H3H	OK	305.708	82.7789	-1.88482	-8.60967	5e-05	0.000349444
XLOC_006254	XLOC_006254	YPR157W	chrXVI:841265-842669	WT	H3D_H3H	OK	101.588	27.5888	-1.88057	-5.67318	5e-05	0.000349444
XLOC_005038	XLOC_005038	YNL277W	chrXIV:117348-118826	WT	H3D_H3H	OK	125.875	34.2346	-1.87846	-5.94308	5e-05	0.000349444
XLOC_006122	XLOC_006122	YPL091W	chrXVI:375501-376953	WT	H3D_H3H	OK	625.37	173.083	-1.85325	-8.29736	5e-05	0.000349444
XLOC_003574	XLOC_003574	YJR137C	chrX:678956-683285	WT	H3D_H3H	OK	97.3413	27.1059	-1.84445	-7.5457	5e-05	0.000349444
XLOC_003487	XLOC_003487	YJL048C	chrX:347446-348637	WT	H3D_H3H	OK	814.857	227.488	-1.84076	-8.26632	5e-05	0.000349444
XLOC_000371	XLOC_000371	YBL033C	chrII:158655-159693	WT	H3D_H3H	OK	601.997	169.779	-1.8261	-8.06126	5e-05	0.000349444
XLOC_000661	XLOC_000661	YCL030C	chrIII:65933-68333	WT	H3D_H3H	OK	614.32	173.477	-1.82425	-8.36329	5e-05	0.000349444
XLOC_001895	XLOC_001895	YER024W	chrV:202191-204963	WT	H3D_H3H	OK	97.1714	27.5113	-1.82051	-6.75343	5e-05	0.000349444
XLOC_001253	XLOC_001253	YDL048C	chrIV:366738-368211	WT	H3D_H3H	OK	393.988	111.81	-1.8171	-7.72729	5e-05	0.000349444
XLOC_001661	XLOC_001661	YIL003W	chrIX:349121-350003	WT	H3D_H3H	OK	167.074	47.4219	-1.81686	-5.48552	5e-05	0.000349444
XLOC_003013	XLOC_003013	YHR179W	chrVIII:462501-463704	WT	H3D_H3H	OK	2733.43	776.862	-1.81498	-7.69269	5e-05	0.000349444
XLOC_001129	XLOC_001129	YDR513W	chrIV:1470499-1471448	WT	H3D_H3H	OK	3255.83	940.191	-1.792	-7.17337	5e-05	0.000349444
XLOC_003813	XLOC_003813	YKL132C	chrXI:193573-194999	WT	H3D_H3H	OK	47.4288	13.7472	-1.78663	-3.71547	5e-05	0.000349444
XLOC_001353	XLOC_001353	YDR132C	chrIV:718815-720303	WT	H3D_H3H	OK	172.291	50.0102	-1.78456	-6.43085	5e-05	0.000349444
XLOC_004888	XLOC_004888	YMR120C	chrXIII:507501-509280	WT	H3D_H3H	OK	738.015	214.834	-1.78043	-8.17816	5e-05	0.000349444
XLOC_004914	XLOC_004914	YMR169C	chrXIII:599351-600872	WT	H3D_H3H	OK	61.7807	17.9884	-1.78009	-4.71532	5e-05	0.000349444
XLOC_002818	XLOC_002818	YGR209C	chrVII:912912-913227	WT	H3D_H3H	OK	6082.42	1773.2	-1.77829	-7.9066	5e-05	0.000349444
XLOC_002142	XLOC_002142	YER175C	chrV:539463-540363	WT	H3D_H3H	OK	340.787	99.9917	-1.76899	-6.5442	5e-05	0.000349444
XLOC_005162	XLOC_005162	YNL052W	chrXIV:531724-532186	WT	H3D_H3H	OK	939.471	275.942	-1.76748	-6.73336	5e-05	0.000349444
XLOC_004104	XLOC_004104	YLR297W	chrXII:724043-724433	WT	H3D_H3H	OK	598.542	176.531	-1.76153	-5.3098	5e-05	0.000349444
XLOC_005259	XLOC_005259	YNL274C	chrXIV:121117-122170	WT	H3D_H3H	OK	273.272	80.6712	-1.76021	-6.51666	5e-05	0.000349444
XLOC_006312	XLOC_006312	YPL223C	chrXVI:128631-129138	WT	H3D_H3H	OK	141.417	42.1521	-1.74628	-3.80087	5e-05	0.000349444
XLOC_006258	XLOC_006258	YPR160W	chrXVI:861305-864014	WT	H3D_H3H	OK	114.624	34.2052	-1.74462	-6.5835	5e-05	0.000349444
XLOC_002760	XLOC_002760	YGR087C	chrVII:651289-652981	WT	H3D_H3H	OK	61.6628	18.4047	-1.74432	-4.86689	5e-05	0.000349444
XLOC_005118	XLOC_005118	YNL117W	chrXIV:406357-408022	WT	H3D_H3H	OK	29.3735	8.77804	-1.74255	-3.63111	5e-05	0.000349444
XLOC_003087	XLOC_003087	YHR018C	chrVIII:140010-141402	WT	H3D_H3H	OK	798.691	238.727	-1.74227	-7.94823	5e-05	0.000349444
XLOC_004437	XLOC_004437	YLR346C	chrXII:822286-822592	WT	H3D_H3H	OK	1581.34	475.847	-1.73258	-5.87631	5e-05	0.000349444
XLOC_001782	XLOC_001782	YIL014C-A	chrIX:325211-325526	WT	H3D_H3H	OK	292.787	88.3646	-1.72831	-3.20992	0.0003	0.00175994
XLOC_006141	XLOC_006141	YPL054W	chrXVI:455758-456664	WT	H3D_H3H	OK	84.205	25.4882	-1.72408	-3.91578	5e-05	0.000349444
XLOC_004879	XLOC_004879	YMR105C	chrXIII:475896-477606	WT	H3D_H3H	OK	163.915	49.7233	-1.72095	-6.43273	5e-05	0.000349444
XLOC_003141	XLOC_003141	YHR112C	chrVIII:334526-335663	WT	H3D_H3H	OK	446.337	135.655	-1.71819	-7.20464	5e-05	0.000349444
XLOC_002210	XLOC_002210	YFR030W	chrVI:213311-216419	WT	H3D_H3H	OK	111.76	34.0283	-1.71559	-6.80015	5e-05	0.000349444
XLOC_000484	XLOC_000484	YBR157C	chrII:553542-554310	WT	H3D_H3H	OK	141.501	43.2945	-1.70856	-4.52303	5e-05	0.000349444
XLOC_006240	XLOC_006240	YPR127W	chrXVI:790082-791120	WT	H3D_H3H	OK	448.835	137.793	-1.70368	-7.08515	5e-05	0.000349444
XLOC_002901	XLOC_002901	YHR001W-A	chrVIII:107825-108122	WT	H3D_H3H	OK	1955.61	601.568	-1.70082	-4.8148	5e-05	0.000349444
XLOC_001266	XLOC_001266	YDL025C	chrIV:405343-407206	WT	H3D_H3H	OK	224.299	69.098	-1.69871	-6.94934	5e-05	0.000349444
XLOC_006417	XLOC_006417	YPL026C	chrXVI:500674-502183	WT	H3D_H3H	OK	179.897	55.4264	-1.69852	-6.31346	5e-05	0.000349444
XLOC_004994	XLOC_004994	YMR318C	chrXIII:911060-912143	WT	H3D_H3H	OK	1998.08	617.474	-1.69417	-7.72003	5e-05	0.000349444
XLOC_004844	XLOC_004844	YMR041C	chrXIII:350965-351973	WT	H3D_H3H	OK	188.612	58.3446	-1.69275	-5.61382	5e-05	0.000349444
XLOC_005065	XLOC_005065	YNL220W	chrXIV:234412-235714	WT	H3D_H3H	OK	939.497	290.674	-1.69249	-7.75342	5e-05	0.000349444
XLOC_006460	XLOC_006460	YPR061C	chrXVI:675976-676882	WT	H3D_H3H	OK	83.4838	25.8561	-1.69099	-3.99088	5e-05	0.000349444
XLOC_003355	XLOC_003355	YJR096W	chrX:611194-612043	WT	H3D_H3H	OK	455.828	141.985	-1.68275	-6.62576	5e-05	0.000349444
XLOC_001905	XLOC_001905	YER042W	chrV:234936-235491	WT	H3D_H3H	OK	613.856	191.435	-1.68104	-6.10804	5e-05	0.000349444
XLOC_002812	XLOC_002812	YGR197C	chrVII:892496-894140	WT	H3D_H3H	OK	90.1092	28.2113	-1.6754	-5.25135	5e-05	0.000349444
XLOC_004842	XLOC_004842	YMR038C	chrXIII:347510-348260	WT	H3D_H3H	OK	1152.58	362.956	-1.667	-7.4633	5e-05	0.000349444
XLOC_003280	XLOC_003280	YJL052W	chrX:338270-339269	WT	H3D_H3H	OK	4921.14	1553.05	-1.66389	-6.35598	5e-05	0.000349444
XLOC_003747	XLOC_003747	YKR080W	chrXI:590394-591357	WT	H3D_H3H	OK	507.807	160.355	-1.66301	-6.87734	5e-05	0.000349444
XLOC_003154	XLOC_003154	YHR139C	chrVIII:378218-379199	WT	H3D_H3H	OK	51.9591	16.4307	-1.66098	-3.36748	0.0001	0.000669829
XLOC_004799	XLOC_004799	YML054C	chrXIII:165532-167308	WT	H3D_H3H	OK	143.058	45.3158	-1.65852	-6.14318	5e-05	0.000349444
XLOC_000809	XLOC_000809	YDL124W	chrIV:240258-241197	WT	H3D_H3H	OK	2604.53	826.355	-1.65619	-7.48607	5e-05	0.000349444
XLOC_002406	XLOC_002406	YGL059W	chrVII:392222-393698	WT	H3D_H3H	OK	131.93	41.9412	-1.65334	-5.62545	5e-05	0.000349444
XLOC_001861	XLOC_001861	YEL024W	chrV:107259-107907	WT	H3D_H3H	OK	632.062	201.438	-1.64973	-6.46605	5e-05	0.000349444
XLOC_004961	XLOC_004961	YMR265C	chrXIII:796539-797925	WT	H3D_H3H	OK	213.708	68.9003	-1.63306	-6.32771	5e-05	0.000349444
XLOC_001917	XLOC_001917	YER067W	chrV:291702-292563	WT	H3D_H3H	OK	150.474	48.6929	-1.62773	-2.76816	0.0007	0.00365899
XLOC_004681	XLOC_004681	YMR195W	chrXIII:654033-654417	WT	H3D_H3H	OK	650.305	211.328	-1.62163	-5.01213	5e-05	0.000349444
XLOC_000415	XLOC_000415	YBR046C	chrII:330506-331511	WT	H3D_H3H	OK	322.08	105.478	-1.61048	-6.22759	5e-05	0.000349444
XLOC_003485	XLOC_003485	YJL056C	chrX:330430-333073	WT	H3D_H3H	OK	42.7885	14.0856	-1.603	-4.74252	5e-05	0.000349444
XLOC_004351	XLOC_004351	YLR178C	chrXII:513161-513821	WT	H3D_H3H	OK	1019	335.768	-1.60162	-6.95715	5e-05	0.000349444
XLOC_004676	XLOC_004676	YMR189W	chrXIII:637499-640604	WT	H3D_H3H	OK	302.697	99.7956	-1.60083	-7.3291	5e-05	0.000349444
XLOC_001604	XLOC_001604	YIL116W	chrIX:142927-144085	WT	H3D_H3H	OK	858.097	283.033	-1.60017	-7.284	5e-05	0.000349444
XLOC_003723	XLOC_003723	YKR039W	chrXI:515062-516871	WT	H3D_H3H	OK	115.449	38.3318	-1.59064	-5.58342	5e-05	0.000349444
XLOC_000181	XLOC_000181	YBR006W	chrII:247009-248503	WT	H3D_H3H	OK	183.403	61.0018	-1.58809	-5.99848	5e-05	0.000349444
XLOC_000043	XLOC_000043	YAR015W	chrI:169374-170295	WT	H3D_H3H	OK	1025.74	341.277	-1.58765	-7.22241	5e-05	0.000349444
XLOC_000033	XLOC_000033	YAL012W	chrI:130798-131983	WT	H3D_H3H	OK	1485.21	495.813	-1.5828	-7.28324	5e-05	0.000349444
XLOC_000240	XLOC_000240	YBR145W	chrII:533761-534817	WT	H3D_H3H	OK	269.473	90.589	-1.57273	-5.98139	5e-05	0.000349444
XLOC_003996	XLOC_003996	YLR092W	chrXII:323543-326225	WT	H3D_H3H	OK	87.2184	29.3209	-1.57271	-5.81466	5e-05	0.000349444
XLOC_005769	XLOC_005769	YOL099C	chrXV:129236-132508	WT	H3D_H3H	OK	285.189	96.04	-1.57021	-2.91863	0.0005	0.00274127
XLOC_005278	XLOC_005278	YNL241C	chrXIV:196425-197943	WT	H3D_H3H	OK	700.522	237.669	-1.55948	-7.23484	5e-05	0.000349444
XLOC_005873	XLOC_005873	YOR100C	chrXV:513294-514278	WT	H3D_H3H	OK	46.1336	15.8365	-1.54256	-3.13276	0.00025	0.00150744
XLOC_000387	XLOC_000387	YBR001C	chrII:238940-241283	WT	H3D_H3H	OK	76.8586	26.4122	-1.541	-5.36924	5e-05	0.000349444
XLOC_001929	XLOC_001929	YER081W	chrV:322685-324095	WT	H3D_H3H	OK	467.912	161.243	-1.537	-6.76575	5e-05	0.000349444
XLOC_003524	XLOC_003524	YJR025C	chrX:471137-471671	WT	H3D_H3H	OK	1173.54	406.454	-1.52971	-6.45048	5e-05	0.000349444
XLOC_003905	XLOC_003905	YKR052C	chrXI:532549-533464	WT	H3D_H3H	OK	182.377	63.4341	-1.52359	-4.9355	5e-05	0.000349444
XLOC_003260	XLOC_003260	YJL089W	chrX:265925-268415	WT	H3D_H3H	OK	18.6604	6.53441	-1.51385	-3.08462	0.0003	0.00175994
XLOC_006194	XLOC_006194	YPR048W	chrXVI:659181-661053	WT	H3D_H3H	OK	110.533	38.8655	-1.50791	-5.4212	5e-05	0.000349444
XLOC_003766	XLOC_003766	YKL218C	chrXI:17358-18339	WT	H3D_H3H	OK	413.523	145.486	-1.50708	-6.17184	5e-05	0.000349444
XLOC_000949	XLOC_000949	YDR171W	chrIV:806620-807748	WT	H3D_H3H	OK	547.902	192.787	-1.50691	-6.77351	5e-05	0.000349444
XLOC_004460	XLOC_004460	YLR395C	chrXII:909728-909965	WT	H3D_H3H	OK	2185.24	770.24	-1.50441	-4.71839	5e-05	0.000349444
XLOC_005299	XLOC_005299	YNL194C	chrXIV:272709-273615	WT	H3D_H3H	OK	65.3758	23.0664	-1.50296	-3.32938	5e-05	0.000349444
XLOC_002788	XLOC_002788	YGR161C-D	chrVII:817746-823015	WT	H3D_H3H	OK	13.3604	4.72427	-1.4998	-3.85765	5e-05	0.000349444
XLOC_001833	XLOC_001833	YEL072W	chrV:13719-14415	WT	H3D_H3H	OK	101.72	35.9696	-1.49975	-3.37443	5e-05	0.000349444
XLOC_003875	XLOC_003875	YKL001C	chrXI:438776-439385	WT	H3D_H3H	OK	904.591	322.213	-1.48925	-6.20269	5e-05	0.000349444
XLOC_006421	XLOC_006421	YPL019C	chrXVI:514510-517018	WT	H3D_H3H	OK	196.45	70.5503	-1.47744	-6.36825	5e-05	0.000349444
XLOC_005233	XLOC_005233	YNL331C	chrXIV:16117-17248	WT	H3D_H3H	OK	106.886	38.4172	-1.47625	-4.47854	5e-05	0.000349444
XLOC_002622	XLOC_002622	YGL187C	chrVII:149703-150171	WT	H3D_H3H	OK	786.412	283.055	-1.4742	-5.48968	5e-05	0.000349444
XLOC_004222	XLOC_004222	YLL041C	chrXII:53130-53931	WT	H3D_H3H	OK	407.325	147.216	-1.46825	-5.6768	5e-05	0.000349444
XLOC_003614	XLOC_003614	YKL163W	chrXI:144400-145378	WT	H3D_H3H	OK	639.612	231.738	-1.4647	-6.4385	5e-05	0.000349444
XLOC_000679	XLOC_000679	YCR005C	chrIII:120945-122328	WT	H3D_H3H	OK	999.829	364.151	-1.45714	-6.76132	5e-05	0.000349444
XLOC_004964	XLOC_004964	YMR271C	chrXIII:806864-807548	WT	H3D_H3H	OK	147.748	53.9154	-1.45436	-3.94784	5e-05	0.000349444
XLOC_004213	XLOC_004213	YLL056C	chrXII:27408-28305	WT	H3D_H3H	OK	91.8852	33.5532	-1.45338	-3.69761	5e-05	0.000349444
XLOC_001186	XLOC_001186	YDL169C	chrIV:158063-158735	WT	H3D_H3H	OK	147.675	53.9645	-1.45234	-4.03421	5e-05	0.000349444
XLOC_006219	XLOC_006219	YPR094W	chrXVI:720636-720960	WT	H3D_H3H	OK	528.374	193.69	-1.44781	-3.81031	5e-05	0.000349444
XLOC_003853	XLOC_003853	YKL040C	chrXI:361057-361828	WT	H3D_H3H	OK	512.914	188.072	-1.44743	-5.88776	5e-05	0.000349444
XLOC_003866	XLOC_003866	YKL016C	chrXI:407464-407989	WT	H3D_H3H	OK	1273.13	467.166	-1.44637	-6.17881	5e-05	0.000349444
XLOC_001409	XLOC_001409	YDR253C	chrIV:963989-964565	WT	H3D_H3H	OK	185.312	68.4058	-1.43776	-3.8473	5e-05	0.000349444
XLOC_004092	XLOC_004092	YLR267W	chrXII:678211-679924	WT	H3D_H3H	OK	58.4149	21.5874	-1.43614	-4.05578	5e-05	0.000349444
XLOC_003348	XLOC_003348	YJR078W,YJR079W	chrX:578859-581616	WT	H3D_H3H	OK	124.435	46.0664	-1.4336	-3.83529	5e-05	0.000349444
XLOC_000296	XLOC_000296	YBR244W	chrII:707527-708016	WT	H3D_H3H	OK	1012.24	375.611	-1.43024	-5.74822	5e-05	0.000349444
XLOC_001869	XLOC_001869	YEL012W	chrV:131771-132551	WT	H3D_H3H	OK	378.363	140.854	-1.42557	-5.09683	5e-05	0.000349444
XLOC_005907	XLOC_005907	YOR162C	chrXV:639559-641992	WT	H3D_H3H	OK	85.4914	31.8673	-1.4237	-5.15019	5e-05	0.000349444
XLOC_002968	XLOC_002968	YHR111W	chrVIII:333071-334394	WT	H3D_H3H	OK	247.208	92.3755	-1.42014	-5.71529	5e-05	0.000349444
XLOC_001922	XLOC_001922	YER073W	chrV:304029-305592	WT	H3D_H3H	OK	351.62	131.519	-1.41875	-6.20436	5e-05	0.000349444
XLOC_002627	XLOC_002627	YGL179C	chrVII:163408-165091	WT	H3D_H3H	OK	116.304	43.5381	-1.41755	-5.0367	5e-05	0.000349444
XLOC_003580	XLOC_003580	YJR151C	chrX:712254-715740	WT	H3D_H3H	OK	32.9436	12.3517	-1.41529	-4.30987	5e-05	0.000349444
XLOC_001289	XLOC_001289	YDR019C	chrIV:484162-485365	WT	H3D_H3H	OK	771.711	289.868	-1.41266	-6.47735	5e-05	0.000349444
XLOC_004320	XLOC_004320	YLR130C	chrXII:402793-404062	WT	H3D_H3H	OK	496.013	186.433	-1.41172	-6.24337	5e-05	0.000349444
XLOC_004144	XLOC_004144	YLR364W	chrXII:854061-854391	WT	H3D_H3H	OK	416.815	156.775	-1.41071	-3.38698	0.0003	0.00175994
XLOC_000536	XLOC_000536	YBR256C	chrII:727385-728102	WT	H3D_H3H	OK	449.809	169.867	-1.4049	-5.48211	5e-05	0.000349444
XLOC_001246	XLOC_001246	YDL059C	chrIV:344236-344953	WT	H3D_H3H	OK	135.291	51.2086	-1.40161	-3.85474	5e-05	0.000349444
XLOC_005344	XLOC_005344	YNL104C	chrXIV:424894-426808	WT	H3D_H3H	OK	867.564	328.423	-1.40142	-6.48754	5e-05	0.000349444
XLOC_003857	XLOC_003857	YKL026C	chrXI:389379-389883	WT	H3D_H3H	OK	151.423	57.3675	-1.40028	-3.15178	0.00015	0.000946235
XLOC_002061	XLOC_002061	YER052C	chrV:256374-257958	WT	H3D_H3H	OK	532.765	201.936	-1.3996	-6.40726	5e-05	0.000349444
XLOC_000804	XLOC_000804	YDL130W-A	chrIV:229170-229431	WT	H3D_H3H	OK	3499.92	1328.22	-1.39783	-5.44111	5e-05	0.000349444
XLOC_006384	XLOC_006384	YPL095C	chrXVI:368070-369441	WT	H3D_H3H	OK	127.285	48.3179	-1.39744	-4.83014	5e-05	0.000349444
XLOC_004755	XLOC_004755	YML130C	chrXIII:11482-13174	WT	H3D_H3H	OK	349.563	133.059	-1.39349	-6.15335	5e-05	0.000349444
XLOC_004266	XLOC_004266	YLR038C	chrXII:224920-225172	WT	H3D_H3H	OK	2426.76	923.855	-1.39329	-4.82063	5e-05	0.000349444
XLOC_001438	XLOC_001438	YDR298C	chrIV:1058175-1058814	WT	H3D_H3H	OK	922.669	351.685	-1.39153	-5.9226	5e-05	0.000349444
XLOC_003014	XLOC_003014	YHR180W	chrVIII:465177-465669	WT	H3D_H3H	OK	144.973	55.5549	-1.3838	-3.05035	0.0002	0.00123559
XLOC_003391	XLOC_003391	YJR154W	chrX:725783-726824	WT	H3D_H3H	OK	81.5577	31.2728	-1.38291	-3.71946	5e-05	0.000349444
XLOC_005536	XLOC_005536	YOR020W-A	chrXV:371684-371957	WT	H3D_H3H	OK	1269.05	489.3	-1.37496	-4.26276	5e-05	0.000349444
XLOC_001506	XLOC_001506	YDR423C	chrIV:1318045-1319275	WT	H3D_H3H	OK	201.148	77.5738	-1.37462	-5.23743	5e-05	0.000349444
XLOC_005279	XLOC_005279	YNL240C	chrXIV:198501-199977	WT	H3D_H3H	OK	198.428	76.7346	-1.37067	-5.56703	5e-05	0.000349444
XLOC_003373	XLOC_003373	YJR122W	chrX:649775-651269	WT	H3D_H3H	OK	133.454	51.7755	-1.366	-4.91105	5e-05	0.000349444
XLOC_000665	XLOC_000665	YCL025C	chrIII:76017-77919	WT	H3D_H3H	OK	148.247	57.5802	-1.36436	-5.34826	5e-05	0.000349444
XLOC_000638	XLOC_000638	YCR106W	chrIII:310957-313456	WT	H3D_H3H	OK	57.6403	22.4199	-1.3623	-4.46139	5e-05	0.000349444
XLOC_002955	XLOC_002955	YHR087W	chrVIII:280819-281155	WT	H3D_H3H	OK	398.163	154.912	-1.36191	-3.29798	0.00015	0.000946235
XLOC_005094	XLOC_005094	YNL160W	chrXIV:336544-337609	WT	H3D_H3H	OK	3459	1346.03	-1.36165	-5.96106	5e-05	0.000349444
XLOC_000489	XLOC_000489	YBR169C	chrII:573914-575996	WT	H3D_H3H	OK	237.552	92.6682	-1.3581	-5.90329	5e-05	0.000349444
XLOC_004778	XLOC_004778	YML091C	chrXIII:87122-90731	WT	H3D_H3H	OK	61.2251	24.0118	-1.35038	-4.99366	5e-05	0.000349444
XLOC_001399	XLOC_001399	YDR231C	chrIV:926222-926910	WT	H3D_H3H	OK	202.349	79.552	-1.34687	-3.80076	5e-05	0.000349444
XLOC_002930	XLOC_002930	YHR051W	chrVIII:209704-210151	WT	H3D_H3H	OK	1179.15	464.332	-1.34452	-5.44207	5e-05	0.000349444
XLOC_006121	XLOC_006121	YPL092W	chrXVI:373792-375169	WT	H3D_H3H	OK	109.603	43.2043	-1.34304	-4.42079	5e-05	0.000349444
XLOC_002666	XLOC_002666	YGL091C	chrVII:342055-343042	WT	H3D_H3H	OK	337.806	133.167	-1.34296	-5.42317	5e-05	0.000349444
XLOC_001870	XLOC_001870	YEL011W	chrV:133119-135234	WT	H3D_H3H	OK	52.5267	20.8138	-1.33551	-4.0442	5e-05	0.000349444
XLOC_002389	XLOC_002389	YGL090W	chrVII:343318-344584	WT	H3D_H3H	OK	154.374	61.1966	-1.33491	-4.78256	5e-05	0.000349444
XLOC_001919	XLOC_001919	YER069W	chrV:295300-298001	WT	H3D_H3H	OK	258.33	102.656	-1.3314	-5.93095	5e-05	0.000349444
XLOC_004083	XLOC_004083	YLR251W,YLR252W	chrXII:641463-642262	WT	H3D_H3H	OK	565.125	224.753	-1.33023	-3.47403	5e-05	0.000349444
XLOC_001694	XLOC_001694	YIL165C	chrIX:33717-34077	WT	H3D_H3H	OK	318.076	126.598	-1.32912	-3.23659	5e-05	0.000349444
XLOC_006473	XLOC_006473	YPR093C	chrXVI:719557-720424	WT	H3D_H3H	OK	179.785	71.6152	-1.32793	-4.50397	5e-05	0.000349444
XLOC_004716	XLOC_004716	YMR251W	chrXIII:772914-774015	WT	H3D_H3H	OK	40.3026	16.0853	-1.32513	-2.92082	0.00025	0.00150744
XLOC_004363	XLOC_004363	YLR205C	chrXII:552723-553677	WT	H3D_H3H	OK	623.232	250.187	-1.31676	-5.83837	5e-05	0.000349444
XLOC_002386	XLOC_002386	YGL096W	chrVII:325330-326161	WT	H3D_H3H	OK	152.828	61.3855	-1.31594	-4.03483	5e-05	0.000349444
XLOC_002524	XLOC_002524	YGR155W	chrVII:798542-800066	WT	H3D_H3H	OK	1855.79	747.631	-1.31164	-5.78471	5e-05	0.000349444
XLOC_004955	XLOC_004955	YMR256C	chrXIII:778944-779127	WT	H3D_H3H	OK	4657.3	1879.39	-1.30923	-4.08983	5e-05	0.000349444
XLOC_000168	XLOC_000168	YBL015W	chrII:194121-195702	WT	H3D_H3H	OK	150.575	60.8896	-1.30621	-5.1063	5e-05	0.000349444
XLOC_000983	XLOC_000983	YDR223W	chrIV:912098-913502	WT	H3D_H3H	OK	110.422	44.7513	-1.30303	-4.41447	5e-05	0.000349444
XLOC_003359	XLOC_003359	YJR103W	chrX:620753-622490	WT	H3D_H3H	OK	242.362	99.1073	-1.2901	-5.6125	5e-05	0.000349444
XLOC_003372	XLOC_003372	YJR121W	chrX:647606-649142	WT	H3D_H3H	OK	1060.08	433.521	-1.28999	-5.97623	5e-05	0.000349444
XLOC_003620	XLOC_003620	YKL150W	chrXI:166543-167452	WT	H3D_H3H	OK	1158.9	474.342	-1.28876	-5.94471	5e-05	0.000349444
XLOC_003471	XLOC_003471	YJL079C	chrX:289874-290774	WT	H3D_H3H	OK	636.958	260.9	-1.2877	-5.62215	5e-05	0.000349444
XLOC_000149	XLOC_000149	YBL049W	chrII:126827-127244	WT	H3D_H3H	OK	379.067	155.451	-1.286	-3.67658	5e-05	0.000349444
XLOC_006178	XLOC_006178	YPR020W	chrXVI:599869-600217	WT	H3D_H3H	OK	802.549	329.345	-1.28499	-4.15672	5e-05	0.000349444
XLOC_001060	XLOC_001060	YDR377W	chrIV:1228610-1228916	WT	H3D_H3H	OK	1786.42	734.017	-1.28318	-4.70604	5e-05	0.000349444
XLOC_005159	XLOC_005159	YNL054W-A	chrXIV:519455-520778	WT	H3D_H3H	OK	104.834	43.2265	-1.27812	-4.16229	5e-05	0.000349444
XLOC_000597	XLOC_000597	YCR019W	chrIII:152836-153928	WT	H3D_H3H	OK	87.0593	35.9269	-1.27693	-3.63335	5e-05	0.000349444
XLOC_000060	XLOC_000060	YAL067C	chrI:7234-9016	WT	H3D_H3H	OK	33.4156	13.8592	-1.26968	-2.96495	0.0002	0.00123559
XLOC_000868	XLOC_000868	YDR003W	chrIV:454121-454754	WT	H3D_H3H	OK	376.253	156.14	-1.26886	-4.59744	5e-05	0.000349444
XLOC_005306	XLOC_005306	YNL176C	chrXIV:305069-306980	WT	H3D_H3H	OK	287.979	119.628	-1.26741	-5.60112	5e-05	0.000349444
XLOC_001809	XLOC_001809	YIR038C	chrIX:423808-424513	WT	H3D_H3H	OK	648.761	269.626	-1.26673	-5.28533	5e-05	0.000349444
XLOC_001927	XLOC_001927	YER079W	chrV:318919-319552	WT	H3D_H3H	OK	220.435	91.776	-1.26417	-3.864	5e-05	0.000349444
XLOC_003042	XLOC_003042	YHR215W	chrVIII:552098-553502	WT	H3D_H3H	OK	41.6369	17.4899	-1.25134	-3.03298	0.00015	0.000946235
XLOC_001363	XLOC_001363	YDR148C	chrIV:753674-755066	WT	H3D_H3H	OK	351.028	147.599	-1.2499	-5.48993	5e-05	0.000349444
XLOC_001307	XLOC_001307	YDR046C	chrIV:548761-550576	WT	H3D_H3H	OK	514.472	216.405	-1.24936	-5.77115	5e-05	0.000349444
XLOC_001296	XLOC_001296	YDR032C	chrIV:504098-504695	WT	H3D_H3H	OK	2093.75	881.694	-1.24774	-5.76658	5e-05	0.000349444
XLOC_002777	XLOC_002777	YGR138C	chrVII:763761-765606	WT	H3D_H3H	OK	926.12	391.762	-1.24122	-5.80283	5e-05	0.000349444
XLOC_004845	XLOC_004845	YMR045C	chrXIII:357358-362627	WT	H3D_H3H	OK	52.7835	22.3496	-1.23984	-4.98046	5e-05	0.000349444
XLOC_003560	XLOC_003560	YJR109C	chrX:629584-632941	WT	H3D_H3H	OK	216.112	91.7684	-1.23571	-5.64718	5e-05	0.000349444
XLOC_001834	XLOC_001834	YEL071W	chrV:16354-17845	WT	H3D_H3H	OK	1092.89	464.809	-1.23343	-5.71605	5e-05	0.000349444
XLOC_002062	XLOC_002062	YER053C	chrV:258736-259639	WT	H3D_H3H	OK	457.725	194.81	-1.23241	-5.13577	5e-05	0.000349444
XLOC_000242	XLOC_000242	YBR147W	chrII:536574-537465	WT	H3D_H3H	OK	94.6378	40.4091	-1.22773	-3.28969	5e-05	0.000349444
XLOC_004920	XLOC_004920	YMR181C	chrXIII:623615-624080	WT	H3D_H3H	OK	504.435	215.892	-1.22436	-4.18257	5e-05	0.000349444
XLOC_006437	XLOC_006437	YPR010C-A	chrXVI:582372-582734	WT	H3D_H3H	OK	2354.49	1008.76	-1.22283	-3.77435	5e-05	0.000349444
XLOC_005477	XLOC_005477	YOL083W	chrXV:165713-166952	WT	H3D_H3H	OK	110.505	47.3585	-1.22241	-3.95875	5e-05	0.000349444
XLOC_002159	XLOC_002159	YFL055W	chrVI:17003-18680	WT	H3D_H3H	OK	43.4884	18.7099	-1.21683	-3.21204	5e-05	0.000349444
XLOC_006275	XLOC_006275	YPR191W	chrXVI:919380-920487	WT	H3D_H3H	OK	655.506	282.763	-1.21302	-5.51932	5e-05	0.000349444
XLOC_005625	XLOC_005625	YOR190W	chrXV:690694-692032	WT	H3D_H3H	OK	54.3502	23.4944	-1.20997	-3.16108	0.0001	0.000669829
XLOC_005254	XLOC_005254	YNL284C-B	chrXIV:96963-102232	WT	H3D_H3H	OK	102.362	44.2892	-1.20866	-5.402	5e-05	0.000349444
XLOC_005308	XLOC_005308	YNL173C	chrXIV:308956-310057	WT	H3D_H3H	OK	217.321	94.0951	-1.20764	-4.79465	5e-05	0.000349444
XLOC_005790	XLOC_005790	YOL064C	chrXV:206102-207176	WT	H3D_H3H	OK	421.39	182.613	-1.20636	-5.16829	5e-05	0.000349444
XLOC_003933	XLOC_003933	YLL061W	chrXII:17955-19707	WT	H3D_H3H	OK	100.162	43.5029	-1.20315	-4.24171	5e-05	0.000349444
XLOC_002964	XLOC_002964	YHR106W	chrVIII:325597-326626	WT	H3D_H3H	OK	151.393	65.7596	-1.20303	-4.10127	5e-05	0.000349444
XLOC_005294	XLOC_005294	YNL200C	chrXIV:263712-264453	WT	H3D_H3H	OK	301.841	131.339	-1.2005	-4.37677	5e-05	0.000349444
XLOC_003392	XLOC_003392	YJR155W	chrX:727404-728271	WT	H3D_H3H	OK	115.273	50.1968	-1.19939	-3.50251	5e-05	0.000349444
XLOC_006333	XLOC_006333	YPL177C	chrXVI:213041-213962	WT	H3D_H3H	OK	250.7	109.416	-1.19614	-4.52005	5e-05	0.000349444
XLOC_001565	XLOC_001565	YDR529C	chrIV:1496164-1496548	WT	H3D_H3H	OK	1892.38	827.563	-1.19326	-5.0687	5e-05	0.000349444
XLOC_003656	XLOC_003656	YKL085W	chrXI:279122-280127	WT	H3D_H3H	OK	702.067	308.091	-1.18825	-5.3894	5e-05	0.000349444
XLOC_000008	XLOC_000008	YAL060W	chrI:35154-36303	WT	H3D_H3H	OK	614.191	269.565	-1.18805	-5.38938	5e-05	0.000349444
XLOC_002275	XLOC_002275	YFR033C	chrVI:224325-224769	WT	H3D_H3H	OK	1096.81	481.566	-1.18751	-5.09196	5e-05	0.000349444
XLOC_001534	XLOC_001534	YDR481C	chrIV:1418549-1420250	WT	H3D_H3H	OK	395.75	174.409	-1.18212	-5.3807	5e-05	0.000349444
XLOC_002444	XLOC_002444	YGR019W	chrVII:525228-526644	WT	H3D_H3H	OK	433.84	191.477	-1.17999	-5.30294	5e-05	0.000349444
XLOC_004457	XLOC_004457	YLR387C	chrXII:896373-897672	WT	H3D_H3H	OK	282.335	124.685	-1.17912	-4.90979	5e-05	0.000349444
XLOC_003261	XLOC_003261	YJL088W	chrX:268798-269815	WT	H3D_H3H	OK	921.428	407.281	-1.17785	-5.4449	5e-05	0.000349444
XLOC_006205	XLOC_006205	YPR067W	chrXVI:682219-682777	WT	H3D_H3H	OK	344.582	152.663	-1.17449	-3.97313	5e-05	0.000349444
XLOC_000864	XLOC_000864	YDL004W	chrIV:443028-443511	WT	H3D_H3H	OK	969.125	429.603	-1.17368	-4.75653	5e-05	0.000349444
XLOC_001003	XLOC_001003	YDR261W-B	chrIV:981461-986775	WT	H3D_H3H	OK	21.2854	9.45009	-1.17146	-3.77499	5e-05	0.000349444
XLOC_002497	XLOC_002497	YGR110W	chrVII:713708-715046	WT	H3D_H3H	OK	87.62	38.9096	-1.17113	-3.64858	5e-05	0.000349444
XLOC_000194	XLOC_000194	YBR039W	chrII:315574-316510	WT	H3D_H3H	OK	612.4	272.028	-1.17072	-5.16003	5e-05	0.000349444
XLOC_002070	XLOC_002070	YER062C	chrV:279929-280682	WT	H3D_H3H	OK	810.149	361.155	-1.16557	-5.1915	5e-05	0.000349444
XLOC_005685	XLOC_005685	YOR303W	chrXV:882898-884134	WT	H3D_H3H	OK	1342.38	599.679	-1.16253	-5.39222	5e-05	0.000349444
XLOC_003223	XLOC_003223	YJL161W	chrX:117244-117787	WT	H3D_H3H	OK	238.627	106.712	-1.16104	-3.42819	5e-05	0.000349444
XLOC_005620	XLOC_005620	YOR184W	chrXV:679356-680544	WT	H3D_H3H	OK	811.623	363.595	-1.15848	-5.37189	5e-05	0.000349444
XLOC_006029	XLOC_006029	YPL271W	chrXVI:30078-30267	WT	H3D_H3H	OK	3776.17	1692	-1.15819	-3.57838	5e-05	0.000349444
XLOC_006392	XLOC_006392	YPL078C	chrXVI:408009-408744	WT	H3D_H3H	OK	809.068	362.742	-1.15732	-5.05689	5e-05	0.000349444
XLOC_001695	XLOC_001695	YIL164C	chrIX:34086-34686	WT	H3D_H3H	OK	126.164	56.5822	-1.15687	-2.99522	0.0004	0.00226823
XLOC_002219	XLOC_002219	YFR049W	chrVI:248522-248894	WT	H3D_H3H	OK	447.026	200.51	-1.15669	-3.30246	5e-05	0.000349444
XLOC_000124	XLOC_000124	YBL099W	chrII:36988-38690	WT	H3D_H3H	OK	715.579	321.115	-1.15602	-5.31766	5e-05	0.000349444
XLOC_003222	XLOC_003222	YJL166W	chrX:106433-106718	WT	H3D_H3H	OK	1886.78	846.803	-1.15583	-4.25612	5e-05	0.000349444
XLOC_005071	XLOC_005071	YNL212W	chrXIV:247460-249809	WT	H3D_H3H	OK	118.92	53.4019	-1.15503	-4.67572	5e-05	0.000349444
XLOC_006069	XLOC_006069	YPL203W	chrXVI:166255-167398	WT	H3D_H3H	OK	211.084	94.7935	-1.15496	-4.41908	5e-05	0.000349444
XLOC_003762	XLOC_003762	YKR106W	chrXI:661441-663289	WT	H3D_H3H	OK	25.8084	11.6435	-1.14831	-2.63455	0.001	0.00506285
XLOC_006180	XLOC_006180	YPR026W	chrXVI:615378-619014	WT	H3D_H3H	OK	42.7148	19.3731	-1.14068	-4.03088	5e-05	0.000349444
XLOC_005887	XLOC_005887	YOR130C	chrXV:569928-570807	WT	H3D_H3H	OK	136.525	61.926	-1.14055	-3.53797	5e-05	0.000349444
XLOC_001087	XLOC_001087	YDR421W	chrIV:1312039-1314892	WT	H3D_H3H	OK	68.4535	31.1268	-1.13697	-4.29889	5e-05	0.000349444
XLOC_005363	XLOC_005363	YNL055C	chrXIV:517993-518845	WT	H3D_H3H	OK	2364.49	1075.43	-1.13662	-5.22603	5e-05	0.000349444
XLOC_001601	XLOC_001601	YIL121W	chrIX:132243-133872	WT	H3D_H3H	OK	58.9202	26.8037	-1.13633	-3.35771	5e-05	0.000349444
XLOC_002228	XLOC_002228	YFL054C	chrVI:20846-22787	WT	H3D_H3H	OK	74.5225	33.9267	-1.13525	-3.96765	5e-05	0.000349444
XLOC_003544	XLOC_003544	YJR073C	chrX:572314-572935	WT	H3D_H3H	OK	850.576	388.019	-1.13231	-4.94078	5e-05	0.000349444
XLOC_002508	XLOC_002508	YGR127W	chrVII:746797-747736	WT	H3D_H3H	OK	115.428	52.69	-1.1314	-3.35362	5e-05	0.000349444
XLOC_000348	XLOC_000348	YBL075C	chrII:84498-86448	WT	H3D_H3H	OK	100.41	45.8346	-1.13139	-4.20195	5e-05	0.000349444
XLOC_006370	XLOC_006370	YPL119C	chrXVI:324410-326264	WT	H3D_H3H	OK	30.8987	14.1602	-1.1257	-2.86905	0.0003	0.00175994
XLOC_004328	XLOC_004328	YLR149C	chrXII:437630-439823	WT	H3D_H3H	OK	78.8212	36.1405	-1.12497	-3.98564	5e-05	0.000349444
XLOC_003484	XLOC_003484	YJL057C	chrX:328117-330121	WT	H3D_H3H	OK	86.5367	39.7431	-1.12261	-4.07326	5e-05	0.000349444
XLOC_006366	XLOC_006366	YPL123C	chrXVI:317640-318945	WT	H3D_H3H	OK	127.678	58.6665	-1.1219	-3.93575	5e-05	0.000349444
XLOC_002404	XLOC_002404	YGL062W	chrVII:385195-388732	WT	H3D_H3H	OK	158.194	72.6954	-1.12176	-5.07623	5e-05	0.000349444
XLOC_001046	XLOC_001046	YDR353W	chrIV:1183298-1184258	WT	H3D_H3H	OK	2008.37	923.535	-1.12079	-5.15821	5e-05	0.000349444
XLOC_005183	XLOC_005183	YNL015W	chrXIV:605383-605611	WT	H3D_H3H	OK	2820.56	1297.28	-1.12049	-3.89172	5e-05	0.000349444
XLOC_002512	XLOC_002512	YGR134W	chrVII:757769-761138	WT	H3D_H3H	OK	56.0303	25.8145	-1.11803	-4.14907	5e-05	0.000349444
XLOC_000982	XLOC_000982	YDR222W	chrIV:910053-911301	WT	H3D_H3H	OK	150.697	69.468	-1.11723	-3.98492	5e-05	0.000349444
XLOC_000948	XLOC_000948	YDR170W-A	chrIV:803194-804517	WT	H3D_H3H	OK	99.0453	45.683	-1.11643	-3.63755	5e-05	0.000349444
XLOC_000192	XLOC_000192	YBR033W	chrII:301943-304703	WT	H3D_H3H	OK	29.8978	13.8038	-1.11497	-3.20724	0.0001	0.000669829
XLOC_004138	XLOC_004138	YLR356W	chrXII:840320-840914	WT	H3D_H3H	OK	492.671	227.951	-1.1119	-4.20564	5e-05	0.000349444
XLOC_003275	XLOC_003275	YJL060W	chrX:323385-324720	WT	H3D_H3H	OK	208.906	96.6896	-1.11142	-4.42898	5e-05	0.000349444
XLOC_005054	XLOC_005054	YNL239W	chrXIV:200568-201933	WT	H3D_H3H	OK	601.898	279.409	-1.10714	-5.09989	5e-05	0.000349444
XLOC_006271	XLOC_006271	YPR184W	chrXVI:902043-906654	WT	H3D_H3H	OK	45.9553	21.3476	-1.10616	-4.30299	5e-05	0.000349444
XLOC_005919	XLOC_005919	YOR185C	chrXV:681443-682106	WT	H3D_H3H	OK	549.048	255.174	-1.10545	-4.46656	5e-05	0.000349444
XLOC_004682	XLOC_004682	YMR196W	chrXIII:655075-658342	WT	H3D_H3H	OK	115.457	53.9186	-1.09851	-4.7316	5e-05	0.000349444
XLOC_002962	XLOC_002962	YHR104W	chrVIII:323408-324392	WT	H3D_H3H	OK	616.175	287.999	-1.09728	-4.88924	5e-05	0.000349444
XLOC_004281	XLOC_004281	YLR058C	chrXII:257991-259401	WT	H3D_H3H	OK	1150.03	537.901	-1.09626	-5.08371	5e-05	0.000349444
XLOC_003561	XLOC_003561	YJR111C	chrX:635854-636706	WT	H3D_H3H	OK	157.712	73.781	-1.09597	-3.55718	5e-05	0.000349444
XLOC_001269	XLOC_001269	YDL020C	chrIV:415112-416708	WT	H3D_H3H	OK	249.457	116.722	-1.09572	-4.71901	5e-05	0.000349444
XLOC_002771	XLOC_002771	YGR121C	chrVII:731448-732927	WT	H3D_H3H	OK	117.239	55.0055	-1.09181	-3.96367	5e-05	0.000349444
XLOC_005702	XLOC_005702	YOR337W	chrXV:954343-956623	WT	H3D_H3H	OK	170.503	79.9961	-1.09179	-4.70295	5e-05	0.000349444
XLOC_000433	XLOC_000433	YBR068C	chrII:373860-375690	WT	H3D_H3H	OK	766.297	360.105	-1.08948	-5.10879	5e-05	0.000349444
XLOC_000364	XLOC_000364	YBL045C	chrII:134142-135516	WT	H3D_H3H	OK	550.507	258.811	-1.08886	-4.98607	5e-05	0.000349444
XLOC_006151	XLOC_006151	YPL036W	chrXVI:482842-485686	WT	H3D_H3H	OK	34.8172	16.3946	-1.08658	-3.36647	5e-05	0.000349444
XLOC_003936	XLOC_003936	YLL049W	chrXII:40665-41205	WT	H3D_H3H	OK	405.795	191.433	-1.08391	-3.75702	5e-05	0.000349444
XLOC_004105	XLOC_004105	YLR299W	chrXII:726068-728051	WT	H3D_H3H	OK	277.52	131.025	-1.08275	-4.88297	5e-05	0.000349444
XLOC_001921	XLOC_001921	YER072W	chrV:302805-303195	WT	H3D_H3H	OK	1828.81	863.984	-1.08183	-4.63733	5e-05	0.000349444
XLOC_003736	XLOC_003736	YKR061W	chrXI:557676-558954	WT	H3D_H3H	OK	533.254	252.343	-1.07944	-4.91089	5e-05	0.000349444
XLOC_004854	XLOC_004854	YMR062C	chrXIII:395053-396379	WT	H3D_H3H	OK	393.799	186.412	-1.07896	-4.76996	5e-05	0.000349444
XLOC_001391	XLOC_001391	YDR210C-D	chrIV:878658-883927	WT	H3D_H3H	OK	38.0681	18.1296	-1.07024	-4.08203	5e-05	0.000349444
XLOC_000006	XLOC_000006	YAL062W	chrI:31566-32940	WT	H3D_H3H	OK	84.644	40.3788	-1.06781	-3.59012	5e-05	0.000349444
XLOC_005860	XLOC_005860	YOR071C	chrXV:459479-461276	WT	H3D_H3H	OK	88.8887	42.4777	-1.0653	-3.73273	5e-05	0.000349444
XLOC_005766	XLOC_005766	YOL104C	chrXV:116395-117454	WT	H3D_H3H	OK	107.488	51.4067	-1.06414	-3.24757	5e-05	0.000349444
XLOC_004763	XLOC_004763	YML120C	chrXIII:28265-29807	WT	H3D_H3H	OK	263.059	126.009	-1.06186	-4.6009	5e-05	0.000349444
XLOC_005853	XLOC_005853	YOR059C	chrXV:438905-440258	WT	H3D_H3H	OK	149.395	71.667	-1.05975	-3.99168	5e-05	0.000349444
XLOC_001639	XLOC_001639	YIL045W	chrIX:271160-272777	WT	H3D_H3H	OK	46.7542	22.4673	-1.05727	-2.94163	0.00025	0.00150744
XLOC_000036	XLOC_000036	YAL008W	chrI:136913-137510	WT	H3D_H3H	OK	320.766	154.961	-1.04962	-3.63117	5e-05	0.000349444
XLOC_001963	XLOC_001963	YER143W	chrV:456318-457605	WT	H3D_H3H	OK	253.244	122.402	-1.0489	-4.36493	5e-05	0.000349444
XLOC_005104	XLOC_005104	YNL142W	chrXIV:357452-358952	WT	H3D_H3H	OK	54.8794	26.5879	-1.0455	-2.97431	0.0003	0.00175994
XLOC_002311	XLOC_002311	YGL234W	chrVII:56481-58890	WT	H3D_H3H	OK	726.612	352.052	-1.0454	-4.8031	5e-05	0.000349444
XLOC_006170	XLOC_006170	YPR001W	chrXVI:556376-557837	WT	H3D_H3H	OK	51.9084	25.1683	-1.04436	-2.92639	0.0003	0.00175994
XLOC_002700	XLOC_002700	YGL026C	chrVII:446411-448535	WT	H3D_H3H	OK	514.407	250.093	-1.04045	-4.85936	5e-05	0.000349444
XLOC_004630	XLOC_004630	YMR108W	chrXIII:484083-486147	WT	H3D_H3H	OK	686.501	334.816	-1.03589	-4.81509	5e-05	0.000349444
XLOC_000520	XLOC_000520	YBR230C	chrII:679548-680050	WT	H3D_H3H	OK	599.662	292.532	-1.03555	-3.54984	5e-05	0.000349444
XLOC_003401	XLOC_003401	YJL212C	chrX:33849-36249	WT	H3D_H3H	OK	81.0017	39.5836	-1.03305	-3.86229	5e-05	0.000349444
XLOC_003503	XLOC_003503	YJL012C	chrX:411233-413399	WT	H3D_H3H	OK	298.652	146.173	-1.03078	-4.7076	5e-05	0.000349444
XLOC_001413	XLOC_001413	YDR258C	chrIV:971807-974243	WT	H3D_H3H	OK	203.109	99.4615	-1.03004	-4.58629	5e-05	0.000349444
XLOC_000459	XLOC_000459	YBR111C	chrII:461177-461873	WT	H3D_H3H	OK	672.766	329.54	-1.02965	-4.41585	5e-05	0.000349444
XLOC_002302	XLOC_002302	YGL248W	chrVII:35652-36762	WT	H3D_H3H	OK	598.279	293.281	-1.02853	-4.6915	5e-05	0.000349444
XLOC_002258	XLOC_002258	YFR003C	chrVI:152656-153124	WT	H3D_H3H	OK	446.173	218.829	-1.0278	-3.59396	5e-05	0.000349444
XLOC_003437	XLOC_003437	YJL153C	chrX:134331-135933	WT	H3D_H3H	OK	48.6487	23.9029	-1.02521	-2.94859	0.0002	0.00123559
XLOC_000096	XLOC_000096	YAL015C	chrI:126902-128102	WT	H3D_H3H	OK	140.279	68.9866	-1.02391	-3.74803	5e-05	0.000349444
XLOC_004255	XLOC_004255	YLR023C	chrXII:185497-187129	WT	H3D_H3H	OK	147.977	72.793	-1.0235	-3.97793	5e-05	0.000349444
XLOC_002011	XLOC_002011	YEL039C	chrV:79635-79977	WT	H3D_H3H	OK	537.819	264.587	-1.02338	-3.0578	0.00015	0.000946235
XLOC_002719	XLOC_002719	YGR008C	chrVII:508109-508364	WT	H3D_H3H	OK	3289.36	1618.56	-1.0231	-4.11527	5e-05	0.000349444
XLOC_004625	XLOC_004625	YMR094W	chrXIII:455824-457261	WT	H3D_H3H	OK	45.7371	22.6162	-1.01601	-2.68939	0.00055	0.00298932
XLOC_006505	XLOC_006505	YPR158C-D	chrXVI:850988-856257	WT	H3D_H3H	OK	65.08	32.1925	-1.01549	-4.32807	5e-05	0.000349444
XLOC_005998	XLOC_005998	YOR344C	chrXV:977193-978069	WT	H3D_H3H	OK	568.455	281.444	-1.0142	-4.43066	5e-05	0.000349444
XLOC_002336	XLOC_002336	YGL191W	chrVII:144807-145197	WT	H3D_H3H	OK	2251.26	1116	-1.01239	-4.47537	5e-05	0.000349444
XLOC_002284	XLOC_002284	YFR047C	chrVI:244278-245166	WT	H3D_H3H	OK	422.649	210.327	-1.00683	-4.24595	5e-05	0.000349444
XLOC_004088	XLOC_004088	YLR258W	chrXII:660715-662833	WT	H3D_H3H	OK	192.945	96.123	-1.00524	-4.36349	5e-05	0.000349444
XLOC_004980	XLOC_004980	YMR300C	chrXIII:865558-867091	WT	H3D_H3H	OK	294.786	146.941	-1.00443	-4.39979	5e-05	0.000349444
XLOC_004378	XLOC_004378	YLR231C	chrXII:605757-607177	WT	H3D_H3H	OK	180.033	89.9142	-1.00164	-3.65311	5e-05	0.000349444
XLOC_004185	XLOC_004185	YLR432W	chrXII:1002556-1004128	WT	H3D_H3H	OK	791.952	395.934	-1.00015	-4.67621	5e-05	0.000349444
XLOC_000107	XLOC_000107	YAR018C	chrI:170395-171703	WT	H3D_H3H	OK	54.0316	108.264	1.00268	3.50223	5e-05	0.000349444
XLOC_003482	XLOC_003482	YJL063C	chrX:315758-316475	WT	H3D_H3H	OK	115.351	231.197	1.0031	3.52619	5e-05	0.000349444
XLOC_005195	XLOC_005195	YNR008W	chrXIV:640395-642381	WT	H3D_H3H	OK	31.0116	62.3325	1.00718	3.39914	5e-05	0.000349444
XLOC_002912	XLOC_002912	YHR023W	chrVIII:151665-157452	WT	H3D_H3H	OK	14.0233	28.2225	1.00902	3.65454	5e-05	0.000349444
XLOC_001849	XLOC_001849	YEL042W	chrV:73770-75327	WT	H3D_H3H	OK	75.6284	152.613	1.01288	3.95853	5e-05	0.000349444
XLOC_000213	XLOC_000213	YBR087W	chrII:423764-424829	WT	H3D_H3H	OK	67.6068	136.592	1.01463	3.41195	5e-05	0.000349444
XLOC_004188	XLOC_004188	YLR439W	chrXII:1014490-1015450	WT	H3D_H3H	OK	76.9856	155.726	1.01635	3.48349	5e-05	0.000349444
XLOC_001155	XLOC_001155	YDL228C	chrIV:44064-45918	WT	H3D_H3H	OK	1025.46	2078.35	1.01917	2.92603	5e-05	0.000349444
XLOC_000697	XLOC_000697	YCR024C-B	chrIII:162598-162865	WT	H3D_H3H	OK	562.201	1140.9	1.02102	3.04293	0.00015	0.000946235
XLOC_001189	XLOC_001189	YDL164C	chrIV:164986-167258	WT	H3D_H3H	OK	28.0038	56.8914	1.02259	3.43279	5e-05	0.000349444
XLOC_003416	XLOC_003416	YJL188C	chrX:75932-76510	WT	H3D_H3H	OK	1182.9	2405.59	1.02406	3.88227	5e-05	0.000349444
XLOC_005146	XLOC_005146	YNL073W	chrXIV:488385-490116	WT	H3D_H3H	OK	49.6171	100.98	1.02516	3.74991	5e-05	0.000349444
XLOC_004151	XLOC_004151	YLR372W	chrXII:867353-868391	WT	H3D_H3H	OK	275.48	560.734	1.02537	4.59482	5e-05	0.000349444
XLOC_003577	XLOC_003577	YJR143C	chrX:698325-700614	WT	H3D_H3H	OK	84.4023	171.91	1.0263	4.42536	5e-05	0.000349444
XLOC_002726	XLOC_002726	YGR027C	chrVII:534131-534458	WT	H3D_H3H	OK	1498.16	3064.23	1.03233	4.4901	5e-05	0.000349444
XLOC_004769	XLOC_004769	YML104C	chrXIII:58938-62322	WT	H3D_H3H	OK	11.8152	24.1855	1.0335	2.98274	0.00015	0.000946235
XLOC_005838	XLOC_005838	YOR034C	chrXV:394836-397086	WT	H3D_H3H	OK	24.0773	49.3129	1.03429	3.26919	5e-05	0.000349444
XLOC_000276	XLOC_000276	YBR203W	chrII:629167-631942	WT	H3D_H3H	OK	16.588	34.0492	1.03748	3.16844	0.00015	0.000946235
XLOC_003251	XLOC_003251	YJL104W	chrX:227326-227776	WT	H3D_H3H	OK	226.356	465.644	1.04064	3.55924	5e-05	0.000349444
XLOC_002317	XLOC_002317	YGL225W	chrVII:76893-77907	WT	H3D_H3H	OK	177.944	366.594	1.04276	4.33593	5e-05	0.000349444
XLOC_003617	XLOC_003617	YKL156W	chrXI:158612-159212	WT	H3D_H3H	OK	1551.07	3196.77	1.04336	3.69789	5e-05	0.000349444
XLOC_002106	XLOC_002106	YER118C	chrV:397951-399055	WT	H3D_H3H	OK	62.1669	128.407	1.04651	3.4792	5e-05	0.000349444
XLOC_001064	XLOC_001064	YDR382W	chrIV:1239491-1239824	WT	H3D_H3H	OK	2508.45	5204.71	1.05302	4.86812	5e-05	0.000349444
XLOC_001362	XLOC_001362	YDR146C	chrIV:748612-750742	WT	H3D_H3H	OK	58.11	120.601	1.05338	4.22617	5e-05	0.000349444
XLOC_001080	XLOC_001080	YDR406W,YDR406W-A	chrIV:1279209-1284044	WT	H3D_H3H	OK	30.5482	63.4082	1.05358	3.59823	5e-05	0.000349444
XLOC_005512	XLOC_005512	YOL017W	chrXV:292528-294673	WT	H3D_H3H	OK	11.3754	23.6721	1.05726	2.57167	0.0009	0.00460856
XLOC_004578	XLOC_004578	YMR011W	chrXIII:288078-289704	WT	H3D_H3H	OK	241.756	504.707	1.06189	4.9165	5e-05	0.000349444
XLOC_004027	XLOC_004027	YLR154W-B	chrXII:454391-454556	WT	H3D_H3H	OK	1535.15	3211.25	1.06475	2.73654	0.00045	0.00249766
XLOC_004737	XLOC_004737	YMR292W	chrXIII:854794-855293	WT	H3D_H3H	OK	154.245	322.969	1.06618	2.93945	0.0003	0.00175994
XLOC_002981	XLOC_002981	YHR128W	chrVIII:362114-362765	WT	H3D_H3H	OK	149.3	313.092	1.06837	3.80584	5e-05	0.000349444
XLOC_004429	XLOC_004429	YLR325C	chrXII:781142-781379	WT	H3D_H3H	OK	2460.68	5176.78	1.073	4.44235	5e-05	0.000349444
XLOC_006336	XLOC_006336	YPL172C	chrXVI:224352-225741	WT	H3D_H3H	OK	23.8921	50.3658	1.07591	2.86076	0.0002	0.00123559
XLOC_005154	XLOC_005154	YNL065W	chrXIV:503723-505484	WT	H3D_H3H	OK	111.384	235.072	1.07756	4.6435	5e-05	0.000349444
XLOC_005741	XLOC_005741	YOL158C	chrXV:19490-21311	WT	H3D_H3H	OK	81.0264	171.261	1.07973	4.41858	5e-05	0.000349444
XLOC_000171	XLOC_000171	YBL009W	chrII:207193-209224	WT	H3D_H3H	OK	19.2199	40.6836	1.08185	3.08037	0.00025	0.00150744
XLOC_006110	XLOC_006110	YPL116W	chrXVI:329605-331699	WT	H3D_H3H	OK	24.7369	52.5981	1.08834	3.4886	5e-05	0.000349444
XLOC_006127	XLOC_006127	YPL081W	chrXVI:404949-406044	WT	H3D_H3H	OK	291.492	620.349	1.08962	4.38885	5e-05	0.000349444
XLOC_004147	XLOC_004147	YLR367W	chrXII:856441-857317	WT	H3D_H3H	OK	620.735	1322.9	1.09165	4.41346	5e-05	0.000349444
XLOC_003809	XLOC_003809	YKL138C	chrXI:185285-185681	WT	H3D_H3H	OK	171.907	367.818	1.09737	3.11529	5e-05	0.000349444
XLOC_002899	XLOC_002899	YHL001W	chrVIII:104276-105091	WT	H3D_H3H	OK	703.465	1505.42	1.09761	4.64389	5e-05	0.000349444
XLOC_003089	XLOC_003089	YHR021C	chrVIII:147870-148669	WT	H3D_H3H	OK	2774.42	5941.3	1.09859	4.71845	5e-05	0.000349444
XLOC_000705	XLOC_000705	YCR031C	chrIII:177499-178220	WT	H3D_H3H	OK	1298.61	2784.89	1.10065	5.01816	5e-05	0.000349444
XLOC_002977	XLOC_002977	YHR123W	chrVIII:354814-356081	WT	H3D_H3H	OK	55.8479	119.949	1.10285	3.6331	5e-05	0.000349444
XLOC_002820	XLOC_002820	YGR213C	chrVII:918511-919465	WT	H3D_H3H	OK	40.4755	87.1163	1.10589	2.96311	0.00015	0.000946235
XLOC_000367	XLOC_000367	YBL039C	chrII:143988-145728	WT	H3D_H3H	OK	91.5786	197.349	1.10767	4.65856	5e-05	0.000349444
XLOC_006355	XLOC_006355	YPL142C	chrXVI:282121-283003	WT	H3D_H3H	OK	1740.98	3752.81	1.10807	4.42374	5e-05	0.000349444
XLOC_003006	XLOC_003006	YHR172W	chrVIII:448334-450806	WT	H3D_H3H	OK	9.80666	21.1519	1.10895	2.69179	0.0006	0.00321655
XLOC_004091	XLOC_004091	YLR264W	chrXII:673130-673334	WT	H3D_H3H	OK	1823.81	3946.06	1.11345	3.81568	5e-05	0.000349444
XLOC_005846	XLOC_005846	YOR049C	chrXV:422667-423732	WT	H3D_H3H	OK	48.2693	104.738	1.11761	3.37951	5e-05	0.000349444
XLOC_001518	XLOC_001518	YDR451C	chrIV:1361119-1362181	WT	H3D_H3H	OK	32.1793	69.8952	1.11906	2.9733	0.00025	0.00150744
XLOC_000265	XLOC_000265	YBR187W	chrII:602633-603476	WT	H3D_H3H	OK	123.995	269.686	1.121	4.17016	5e-05	0.000349444
XLOC_000449	XLOC_000449	YBR092C	chrII:427697-429101	WT	H3D_H3H	OK	269.305	588.228	1.12713	5.20258	5e-05	0.000349444
XLOC_005087	XLOC_005087	YNL174W	chrXIV:307400-308646	WT	H3D_H3H	OK	98.18	214.64	1.12842	2.69254	0.00025	0.00150744
XLOC_005473	XLOC_005473	YOL090W	chrXV:147381-150276	WT	H3D_H3H	OK	23.6878	51.91	1.13187	3.89821	5e-05	0.000349444
XLOC_004289	XLOC_004289	YLR073C	chrXII:281018-281621	WT	H3D_H3H	OK	53.8893	118.21	1.13329	2.69518	0.00065	0.00343478
XLOC_004395	XLOC_004395	YLR272C	chrXII:683671-687202	WT	H3D_H3H	OK	12.7158	27.9414	1.13578	3.47985	5e-05	0.000349444
XLOC_006398	XLOC_006398	YPL067C	chrXVI:425250-425847	WT	H3D_H3H	OK	102.769	226.128	1.13773	3.55756	5e-05	0.000349444
XLOC_005918	XLOC_005918	YOR182C	chrXV:678190-678793	WT	H3D_H3H	OK	4508.69	9926.77	1.13862	4.62649	5e-05	0.000349444
XLOC_004536	XLOC_004536	YML060W	chrXIII:151870-153001	WT	H3D_H3H	OK	19.0122	42.1449	1.14844	2.58194	0.0009	0.00460856
XLOC_003460	XLOC_003460	YJL107C,YJL108C	chrX:217704-220016	WT	H3D_H3H	OK	102.455	227.784	1.15268	4.47418	5e-05	0.000349444
XLOC_003732	XLOC_003732	YKR057W	chrXI:551656-552242	WT	H3D_H3H	OK	1410.89	3137.39	1.15296	4.57127	5e-05	0.000349444
XLOC_000088	XLOC_000088	YAL024C	chrI:101564-105872	WT	H3D_H3H	OK	5.33905	11.9467	1.16195	2.78456	0.0007	0.00365899
XLOC_006112	XLOC_006112	YPL111W	chrXVI:339943-340945	WT	H3D_H3H	OK	108.455	242.88	1.16315	4.55377	5e-05	0.000349444
XLOC_004485	XLOC_004485	YLR441C	chrXII:1018140-1018908	WT	H3D_H3H	OK	922.169	2077.69	1.17188	5.44954	5e-05	0.000349444
XLOC_003433	XLOC_003433	YJL157C	chrX:123835-126328	WT	H3D_H3H	OK	48.232	108.909	1.17506	4.71221	5e-05	0.000349444
XLOC_004029	XLOC_004029	YLR154W-E	chrXII:455432-455636	WT	H3D_H3H	OK	656.094	1481.58	1.17516	2.84199	0.00035	0.00201748
XLOC_004025	XLOC_004025	YLR150W	chrXII:440466-441288	WT	H3D_H3H	OK	1064.88	2405.24	1.17549	5.45802	5e-05	0.000349444
XLOC_000009	XLOC_000009	YAL059W	chrI:36495-37147	WT	H3D_H3H	OK	69.7035	157.731	1.17816	3.31837	0.00015	0.000946235
XLOC_003156	XLOC_003156	YHR141C	chrVIII:381989-382751	WT	H3D_H3H	OK	1370.53	3106.14	1.18039	5.07869	5e-05	0.000349444
XLOC_003750	XLOC_003750	YKR090W	chrXI:608945-611066	WT	H3D_H3H	OK	25.1247	56.9421	1.18039	3.88456	5e-05	0.000349444
XLOC_002482	XLOC_002482	YGR090W	chrVII:662357-666071	WT	H3D_H3H	OK	39.8152	90.3251	1.18181	4.91096	5e-05	0.000349444
XLOC_005654	XLOC_005654	YOR247W,YOR248W	chrXV:797675-798315	WT	H3D_H3H	OK	946.428	2151.53	1.1848	3.93391	5e-05	0.000349444
XLOC_004237	XLOC_004237	YLL013C	chrXII:122074-124714	WT	H3D_H3H	OK	10.7401	24.4293	1.1856	3.08502	5e-05	0.000349444
XLOC_006066	XLOC_006066	YPL208W	chrXVI:157841-159593	WT	H3D_H3H	OK	27.3876	62.6211	1.19313	3.67562	5e-05	0.000349444
XLOC_005628	XLOC_005628	YOR195W	chrXV:712865-715331	WT	H3D_H3H	OK	20.5543	47.126	1.19709	3.82759	5e-05	0.000349444
XLOC_001677	XLOC_001677	YIR021W	chrIX:397214-398385	WT	H3D_H3H	OK	31.6396	72.6613	1.19946	3.1933	5e-05	0.000349444
XLOC_000978	XLOC_000978	YDR213W	chrIV:889750-892492	WT	H3D_H3H	OK	12.3655	28.4754	1.20339	3.46354	5e-05	0.000349444
XLOC_003648	XLOC_003648	YKL096W	chrXI:261131-261851	WT	H3D_H3H	OK	336.327	774.991	1.20432	5.21668	5e-05	0.000349444
XLOC_000899	XLOC_000899	YDR064W	chrIV:579457-580452	WT	H3D_H3H	OK	1814.54	4218.52	1.21713	5.67711	5e-05	0.000349444
XLOC_004796	XLOC_004796	YML059C	chrXIII:153218-158258	WT	H3D_H3H	OK	11.6922	27.2653	1.22151	4.13315	5e-05	0.000349444
XLOC_000341	XLOC_000341	YBL087C	chrII:59821-60739	WT	H3D_H3H	OK	965.755	2256.9	1.22462	5.42623	5e-05	0.000349444
XLOC_006128	XLOC_006128	YPL079W	chrXVI:406635-407539	WT	H3D_H3H	OK	1035.88	2436.07	1.23369	5.66852	5e-05	0.000349444
XLOC_004876	XLOC_004876	YMR102C	chrXIII:469847-472352	WT	H3D_H3H	OK	58.9675	139.239	1.23958	5.17265	5e-05	0.000349444
XLOC_006511	XLOC_006511	YPR166C	chrXVI:876281-876629	WT	H3D_H3H	OK	199.819	472.357	1.24118	3.37853	5e-05	0.000349444
XLOC_002419	XLOC_002419	YGL030W	chrVII:439090-439638	WT	H3D_H3H	OK	2190.16	5187.65	1.24405	5.63718	5e-05	0.000349444
XLOC_000443	XLOC_000443	YBR084C-A	chrII:414185-415261	WT	H3D_H3H	OK	940.625	2240.66	1.25223	5.78833	5e-05	0.000349444
XLOC_001333	XLOC_001333	YDR097C	chrIV:640108-643837	WT	H3D_H3H	OK	15.6496	37.2903	1.25268	4.25102	5e-05	0.000349444
XLOC_002893	XLOC_002893	YHL015W	chrVIII:75411-75777	WT	H3D_H3H	OK	1693	4046.34	1.25704	5.76028	5e-05	0.000349444
XLOC_000350	XLOC_000350	YBL072C	chrII:88522-89125	WT	H3D_H3H	OK	289.39	693.602	1.2611	5.15518	5e-05	0.000349444
XLOC_004481	XLOC_004481	YLR437C	chrXII:1011621-1012023	WT	H3D_H3H	OK	108.585	261.063	1.26557	3.18908	5e-05	0.000349444
XLOC_005726	XLOC_005726	YOR382W	chrXV:1059530-1059992	WT	H3D_H3H	OK	246.391	593.232	1.26765	4.48827	5e-05	0.000349444
XLOC_000023	XLOC_000023	YAL033W	chrI:82705-83227	WT	H3D_H3H	OK	75.6986	182.365	1.26849	3.25059	0.00015	0.000946235
XLOC_003257	XLOC_003257	YJL096W	chrX:246489-246975	WT	H3D_H3H	OK	159.244	385.126	1.27409	4.0886	5e-05	0.000349444
XLOC_000593	XLOC_000593	YCR003W	chrIII:118619-119171	WT	H3D_H3H	OK	95.7482	232.128	1.2776	3.68601	5e-05	0.000349444
XLOC_000214	XLOC_000214	YBR089W	chrII:424989-425782	WT	H3D_H3H	OK	113.94	276.662	1.27985	3.75458	5e-05	0.000349444
XLOC_004860	XLOC_004860	YMR076C	chrXIII:416195-420029	WT	H3D_H3H	OK	11.9678	29.1751	1.28557	3.9521	5e-05	0.000349444
XLOC_004602	XLOC_004602	YMR048W	chrXIII:366980-367934	WT	H3D_H3H	OK	26.3442	64.2363	1.2859	3.10297	0.00045	0.00249766
XLOC_001588	XLOC_001588	YIL148W	chrIX:68707-69528	WT	H3D_H3H	OK	1584.73	3870.62	1.28832	5.91251	5e-05	0.000349444
XLOC_004333	XLOC_004333	YLR154C	chrXII:447981-448314	WT	H3D_H3H	OK	134.468	329.599	1.29345	2.9318	0.00025	0.00150744
XLOC_003565	XLOC_003565	YJR124C	chrX:652891-654238	WT	H3D_H3H	OK	35.9031	88.0715	1.29456	3.94494	5e-05	0.000349444
XLOC_001716	XLOC_001716	YIL131C	chrIX:100780-102235	WT	H3D_H3H	OK	18.4679	45.3178	1.29505	3.33697	5e-05	0.000349444
XLOC_005357	XLOC_005357	YNL069C	chrXIV:493955-495001	WT	H3D_H3H	OK	951.285	2347.44	1.30314	6.04403	5e-05	0.000349444
XLOC_004812	XLOC_004812	YML026C	chrXIII:222986-223828	WT	H3D_H3H	OK	1149.05	2846.15	1.30857	5.97664	5e-05	0.000349444
XLOC_000161	XLOC_000161	YBL027W	chrII:168422-169376	WT	H3D_H3H	OK	1311.66	3256.78	1.31205	6.09323	5e-05	0.000349444
XLOC_004040	XLOC_004040	YLR167W	chrXII:498946-499405	WT	H3D_H3H	OK	2207.72	5491.54	1.31466	6.08637	5e-05	0.000349444
XLOC_006478	XLOC_006478	YPR102C	chrXVI:731223-731748	WT	H3D_H3H	OK	550.636	1374.59	1.31983	5.77707	5e-05	0.000349444
XLOC_000375	XLOC_000375	YBL023C	chrII:174919-177526	WT	H3D_H3H	OK	16.9607	42.3566	1.32039	4.19301	5e-05	0.000349444
XLOC_001102	XLOC_001102	YDR450W	chrIV:1359922-1360798	WT	H3D_H3H	OK	1294.54	3236.44	1.32197	6.08406	5e-05	0.000349444
XLOC_002663	XLOC_002663	YGL102C	chrVII:310966-311933	WT	H3D_H3H	OK	1758.66	4406.39	1.32512	5.6495	5e-05	0.000349444
XLOC_000410	XLOC_000410	YBR037C	chrII:310564-311452	WT	H3D_H3H	OK	40.9405	103.068	1.33199	3.71808	5e-05	0.000349444
XLOC_005557	XLOC_005557	YOR063W	chrXV:444685-445849	WT	H3D_H3H	OK	1353.62	3414.49	1.33485	5.46207	5e-05	0.000349444
XLOC_001884	XLOC_001884	YER011W	chrV:175247-176012	WT	H3D_H3H	OK	30.5485	77.3024	1.33941	2.95158	0.0004	0.00226823
XLOC_004102	XLOC_004102	YLR289W	chrXII:715088-717026	WT	H3D_H3H	OK	13.5215	34.2825	1.34221	3.4146	5e-05	0.000349444
XLOC_005971	XLOC_005971	YOR297C	chrXV:874742-875321	WT	H3D_H3H	OK	58.8506	150.431	1.35397	3.30173	0.0001	0.000669829
XLOC_000832	XLOC_000832	YDL075W	chrIV:322225-322988	WT	H3D_H3H	OK	2191.42	5603.85	1.35455	6.24074	5e-05	0.000349444
XLOC_000584	XLOC_000584	YCL018W	chrIII:91323-92418	WT	H3D_H3H	OK	765.015	1962.47	1.35911	6.19687	5e-05	0.000349444
XLOC_002004	XLOC_002004	YEL054C	chrV:52720-53255	WT	H3D_H3H	OK	324.285	832.212	1.35969	4.07358	5e-05	0.000349444
XLOC_006453	XLOC_006453	YPR044C	chrXVI:654165-654877	WT	H3D_H3H	OK	1345.23	3460.92	1.3633	6.03338	5e-05	0.000349444
XLOC_000601	XLOC_000601	YCR034W	chrIII:190591-191635	WT	H3D_H3H	OK	117.02	303.436	1.37464	5.35775	5e-05	0.000349444
XLOC_004260	XLOC_004260	YLR029C	chrXII:201975-202590	WT	H3D_H3H	OK	1048.6	2722.04	1.37622	6.38597	5e-05	0.000349444
XLOC_004354	XLOC_004354	YLR183C	chrXII:520542-522012	WT	H3D_H3H	OK	27.0318	70.4432	1.3818	4.02442	5e-05	0.000349444
XLOC_006386	XLOC_006386	YPL090C	chrXVI:377290-378395	WT	H3D_H3H	OK	378.008	988.451	1.38675	6.12636	5e-05	0.000349444
XLOC_000831	XLOC_000831	YDL082W	chrIV:308423-309388	WT	H3D_H3H	OK	614.473	1609.43	1.38912	6.26433	5e-05	0.000349444
XLOC_004898	XLOC_004898	YMR142C	chrXIII:550205-551207	WT	H3D_H3H	OK	948.941	2492.1	1.39297	6.40295	5e-05	0.000349444
XLOC_006012	XLOC_006012	YOR369C	chrXV:1028193-1028625	WT	H3D_H3H	OK	1212.23	3207.7	1.40388	6.38977	5e-05	0.000349444
XLOC_003952	XLOC_003952	YLL012W	chrXII:125533-127255	WT	H3D_H3H	OK	72.6421	192.27	1.40425	5.66912	5e-05	0.000349444
XLOC_003925	XLOC_003925	YKR094C	chrXI:617995-618750	WT	H3D_H3H	OK	1036.32	2747.01	1.40639	6.24915	5e-05	0.000349444
XLOC_004680	XLOC_004680	YMR194W	chrXIII:651071-651910	WT	H3D_H3H	OK	1099.56	2917.85	1.40798	5.58258	5e-05	0.000349444
XLOC_005454	XLOC_005454	YOL127W	chrXV:80347-81190	WT	H3D_H3H	OK	1782.89	4743.73	1.4118	6.55062	5e-05	0.000349444
XLOC_002273	XLOC_002273	YFR032C-A	chrVI:223257-223437	WT	H3D_H3H	OK	3341.06	8908.75	1.41492	5.21505	5e-05	0.000349444
XLOC_000322	XLOC_000322	YBR295W	chrII:792848-796499	WT	H3D_H3H	OK	28.3545	75.6122	1.41504	5.56872	5e-05	0.000349444
XLOC_000800	XLOC_000800	YDL136W	chrIV:217599-218367	WT	H3D_H3H	OK	402.858	1078.46	1.42062	5.11577	5e-05	0.000349444
XLOC_004220	XLOC_004220	YLL045C	chrXII:47858-48662	WT	H3D_H3H	OK	396.237	1061.24	1.42131	4.45363	5e-05	0.000349444
XLOC_005979	XLOC_005979	YOR312C	chrXV:900249-901194	WT	H3D_H3H	OK	1054.96	2828.56	1.42289	6.55352	5e-05	0.000349444
XLOC_002758	XLOC_002758	YGR085C	chrVII:648382-648907	WT	H3D_H3H	OK	489.261	1317.72	1.42937	6.16108	5e-05	0.000349444
XLOC_005803	XLOC_005803	YOL040C	chrXV:253148-253577	WT	H3D_H3H	OK	1128.65	3040.01	1.42948	6.50073	5e-05	0.000349444
XLOC_001490	XLOC_001490	YDR384C	chrIV:1241203-1242031	WT	H3D_H3H	OK	84.7358	228.65	1.4321	4.83694	5e-05	0.000349444
XLOC_002904	XLOC_002904	YHR010W	chrVIII:126520-127492	WT	H3D_H3H	OK	1230.52	3323.23	1.43331	6.51656	5e-05	0.000349444
XLOC_001947	XLOC_001947	YER117W	chrV:396768-397653	WT	H3D_H3H	OK	1250.33	3384.9	1.43681	6.54167	5e-05	0.000349444
XLOC_001842	XLOC_001842	YEL053W-A	chrV:52720-53255	WT	H3D_H3H	OK	616.642	1695.09	1.45885	4.24623	5e-05	0.000349444
XLOC_006018	XLOC_006018	YOR383C	chrXV:1060440-1061055	WT	H3D_H3H	OK	143.647	395.866	1.46248	5.14294	5e-05	0.000349444
XLOC_003444	XLOC_003444	YJL136C	chrX:156549-157273	WT	H3D_H3H	OK	1838.01	5066.33	1.4628	6.13362	5e-05	0.000349444
XLOC_005250	XLOC_005250	YNL301C	chrXIV:63569-64562	WT	H3D_H3H	OK	215.557	594.931	1.46465	5.44792	5e-05	0.000349444
XLOC_004700	XLOC_004700	YMR230W	chrXIII:732413-733141	WT	H3D_H3H	OK	1303.68	3602.13	1.46626	6.30953	5e-05	0.000349444
XLOC_003374	XLOC_003374	YJR123W	chrX:651900-652578	WT	H3D_H3H	OK	1116.04	3086.05	1.46737	6.76444	5e-05	0.000349444
XLOC_003216	XLOC_003216	YJL177W	chrX:90785-91657	WT	H3D_H3H	OK	710.371	1967.32	1.46958	6.65025	5e-05	0.000349444
XLOC_004416	XLOC_004416	YLR304C	chrXII:735211-737548	WT	H3D_H3H	OK	337.115	936.246	1.47365	6.70159	5e-05	0.000349444
XLOC_005092	XLOC_005092	YNL162W	chrXIV:331321-332154	WT	H3D_H3H	OK	1560.03	4335.64	1.47467	6.50594	5e-05	0.000349444
XLOC_001650	XLOC_001650	YIL018W	chrIX:316767-317932	WT	H3D_H3H	OK	929.595	2606.49	1.48743	6.85268	5e-05	0.000349444
XLOC_001923	XLOC_001923	YER074W	chrV:306322-307196	WT	H3D_H3H	OK	1218.83	3425.03	1.49062	6.75419	5e-05	0.000349444
XLOC_005677	XLOC_005677	YOR293W	chrXV:867097-867852	WT	H3D_H3H	OK	1799.6	5061.6	1.49192	6.69564	5e-05	0.000349444
XLOC_002796	XLOC_002796	YGR177C	chrVII:848719-850436	WT	H3D_H3H	OK	21.055	59.528	1.49941	4.1445	5e-05	0.000349444
XLOC_005086	XLOC_005086	YNL178W	chrXIV:302679-303402	WT	H3D_H3H	OK	1010.57	2862.14	1.50192	6.94193	5e-05	0.000349444
XLOC_006242	XLOC_006242	YPR132W	chrXVI:794964-795767	WT	H3D_H3H	OK	1239.73	3515.67	1.50377	6.88829	5e-05	0.000349444
XLOC_005758	XLOC_005758	YOL121C	chrXV:92025-92850	WT	H3D_H3H	OK	812.348	2314.94	1.5108	6.6569	5e-05	0.000349444
XLOC_001084	XLOC_001084	YDR418W	chrIV:1301554-1302113	WT	H3D_H3H	OK	1099.5	3133.39	1.51088	6.4066	5e-05	0.000349444
XLOC_000042	XLOC_000042	YAR008W	chrI:158965-159793	WT	H3D_H3H	OK	17.6269	50.404	1.51576	2.90029	0.0007	0.00365899
XLOC_001113	XLOC_001113	YDR471W	chrIV:1401769-1402564	WT	H3D_H3H	OK	912.574	2611.89	1.51708	6.70398	5e-05	0.000349444
XLOC_003353	XLOC_003353	YJR094W-A	chrX:608304-608858	WT	H3D_H3H	OK	1254.96	3618.6	1.52779	6.16401	5e-05	0.000349444
XLOC_004432	XLOC_004432	YLR333C	chrXII:795572-795899	WT	H3D_H3H	OK	878.219	2551.24	1.53855	6.27427	5e-05	0.000349444
XLOC_000128	XLOC_000128	YBL092W	chrII:45977-46370	WT	H3D_H3H	OK	1609.88	4680.19	1.53961	7.08141	5e-05	0.000349444
XLOC_000881	XLOC_000881	YDR025W	chrIV:491514-492324	WT	H3D_H3H	OK	1109.83	3238.17	1.54484	7.07654	5e-05	0.000349444
XLOC_003607	XLOC_003607	YKL180W	chrXI:109268-110129	WT	H3D_H3H	OK	986.783	2886.82	1.54868	7.13802	5e-05	0.000349444
XLOC_000805	XLOC_000805	YDL130W	chrIV:229905-230527	WT	H3D_H3H	OK	1486.7	4349.99	1.5489	6.78394	5e-05	0.000349444
XLOC_004174	XLOC_004174	YLR413W	chrXII:951155-953183	WT	H3D_H3H	OK	59.1765	173.291	1.5501	6.14039	5e-05	0.000349444
XLOC_004605	XLOC_004605	YMR058W	chrXIII:388821-390732	WT	H3D_H3H	OK	127.185	372.529	1.55042	6.94694	5e-05	0.000349444
XLOC_004126	XLOC_004126	YLR340W	chrXII:805783-806825	WT	H3D_H3H	OK	786.395	2309.59	1.55431	6.92083	5e-05	0.000349444
XLOC_004651	XLOC_004651	YMR144W	chrXIII:553361-554390	WT	H3D_H3H	OK	15.6248	45.89	1.55434	3.16278	0.0004	0.00226823
XLOC_002238	XLOC_002238	YFL034C-A	chrVI:64242-64932	WT	H3D_H3H	OK	184.788	547.675	1.56745	4.47427	5e-05	0.000349444
XLOC_000496	XLOC_000496	YBR181C	chrII:591711-592774	WT	H3D_H3H	OK	302.99	899.188	1.56935	6.77664	5e-05	0.000349444
XLOC_005943	XLOC_005943	YOR234C	chrXV:778554-779405	WT	H3D_H3H	OK	956.636	2842.08	1.57091	6.50226	5e-05	0.000349444
XLOC_002781	XLOC_002781	YGR148C	chrVII:787311-787779	WT	H3D_H3H	OK	947.019	2819.07	1.57375	7.12962	5e-05	0.000349444
XLOC_001920	XLOC_001920	YER070W	chrV:298949-301616	WT	H3D_H3H	OK	40.1876	120.19	1.58049	6.27287	5e-05	0.000349444
XLOC_004650	XLOC_004650	YMR143W	chrXIII:551927-552903	WT	H3D_H3H	OK	981.086	2952.15	1.58931	7.13214	5e-05	0.000349444
XLOC_003183	XLOC_003183	YHR203C	chrVIII:504475-505530	WT	H3D_H3H	OK	530.039	1598.39	1.59245	7.32685	5e-05	0.000349444
XLOC_002369	XLOC_002369	YGL123W	chrVII:277616-278381	WT	H3D_H3H	OK	944.461	2849.85	1.59332	6.75722	5e-05	0.000349444
XLOC_003704	XLOC_003704	YKL006W	chrXI:431905-432720	WT	H3D_H3H	OK	965.061	2917.82	1.5962	7.11262	5e-05	0.000349444
XLOC_003578	XLOC_003578	YJR145C	chrX:702026-703068	WT	H3D_H3H	OK	590.921	1789.73	1.5987	7.39186	5e-05	0.000349444
XLOC_001231	XLOC_001231	YDL083C	chrIV:306925-307789	WT	H3D_H3H	OK	870.872	2673.26	1.61807	7.16137	5e-05	0.000349444
XLOC_003415	XLOC_003415	YJL190C	chrX:74909-75302	WT	H3D_H3H	OK	796.015	2456.02	1.62545	6.97378	5e-05	0.000349444
XLOC_001516	XLOC_001516	YDR447C	chrIV:1354828-1355553	WT	H3D_H3H	OK	750.994	2324.94	1.63032	7.06009	5e-05	0.000349444
XLOC_001748	XLOC_001748	YIL070C	chrIX:230271-231072	WT	H3D_H3H	OK	72.2303	223.686	1.6308	5.22276	5e-05	0.000349444
XLOC_003055	XLOC_003055	YHL033C	chrVIII:35254-36025	WT	H3D_H3H	OK	367.572	1138.31	1.6308	7.27205	5e-05	0.000349444
XLOC_005249	XLOC_005249	YNL302C	chrXIV:61957-62943	WT	H3D_H3H	OK	811.674	2517.28	1.63289	7.19885	5e-05	0.000349444
XLOC_005196	XLOC_005196	YNR009W	chrXIV:642689-643439	WT	H3D_H3H	OK	19.1886	59.8033	1.63998	3.0533	0.00045	0.00249766
XLOC_004050	XLOC_004050	YLR185W	chrXII:522662-523288	WT	H3D_H3H	OK	1871.27	5854.12	1.64544	6.99605	5e-05	0.000349444
XLOC_005759	XLOC_005759	YOL120C	chrXV:93394-94402	WT	H3D_H3H	OK	1002.17	3146.99	1.65085	7.59879	5e-05	0.000349444
XLOC_005576	XLOC_005576	YOR096W	chrXV:505793-506767	WT	H3D_H3H	OK	799.716	2532.2	1.66283	7.60621	5e-05	0.000349444
XLOC_002454	XLOC_002454	YGR034W	chrVII:555811-556672	WT	H3D_H3H	OK	1050.64	3365.63	1.67961	7.41105	5e-05	0.000349444
XLOC_001760	XLOC_001760	YIL052C	chrIX:256225-257063	WT	H3D_H3H	OK	820.381	2646.19	1.68955	7.1406	5e-05	0.000349444
XLOC_004948	XLOC_004948	YMR242C	chrXIII:753224-754220	WT	H3D_H3H	OK	724.044	2336.21	1.69002	7.61049	5e-05	0.000349444
XLOC_003938	XLOC_003938	YLL044W	chrXII:47858-48662	WT	H3D_H3H	OK	970.775	3132.75	1.69022	5.57212	5e-05	0.000349444
XLOC_005755	XLOC_005755	YOL126C	chrXV:81786-82920	WT	H3D_H3H	OK	60.275	195.464	1.69727	5.9332	5e-05	0.000349444
XLOC_006102	XLOC_006102	YPL131W	chrXVI:303120-304014	WT	H3D_H3H	OK	862.829	2807.64	1.70221	7.70948	5e-05	0.000349444
XLOC_003976	XLOC_003976	YLR048W	chrXII:242231-243349	WT	H3D_H3H	OK	735.212	2408.78	1.71207	7.88558	5e-05	0.000349444
XLOC_002067	XLOC_002067	YER056C-A	chrV:269422-270185	WT	H3D_H3H	OK	875.777	2880.23	1.71755	7.31861	5e-05	0.000349444
XLOC_002271	XLOC_002271	YFR031C-A	chrVI:220506-221418	WT	H3D_H3H	OK	508.56	1674.05	1.71885	7.87	5e-05	0.000349444
XLOC_000266	XLOC_000266	YBR189W	chrII:604507-605508	WT	H3D_H3H	OK	893.351	2950.61	1.72371	7.93384	5e-05	0.000349444
XLOC_002653	XLOC_002653	YGL123C-A	chrVII:277616-278381	WT	H3D_H3H	OK	1629.17	5384.1	1.72457	2.65299	0.0003	0.00175994
XLOC_004788	XLOC_004788	YML073C	chrXIII:123226-124172	WT	H3D_H3H	OK	534.685	1767.43	1.72489	7.5368	5e-05	0.000349444
XLOC_002101	XLOC_002101	YER111C	chrV:382594-385876	WT	H3D_H3H	OK	6.04631	19.9898	1.72513	4.04399	5e-05	0.000349444
XLOC_000874	XLOC_000874	YDR012W	chrIV:471852-472941	WT	H3D_H3H	OK	233.799	778.778	1.73594	7.76072	5e-05	0.000349444
XLOC_003209	XLOC_003209	YJL191W	chrX:73786-74611	WT	H3D_H3H	OK	229.15	769.765	1.74813	5.96198	5e-05	0.000349444
XLOC_004557	XLOC_004557	YML024W	chrXIII:225888-226697	WT	H3D_H3H	OK	851.333	2870.76	1.75364	7.71968	5e-05	0.000349444
XLOC_000446	XLOC_000446	YBR088C	chrII:424989-425782	WT	H3D_H3H	OK	31.7624	107.586	1.7601	3.43185	0.0001	0.000669829
XLOC_004535	XLOC_004535	YML063W	chrXIII:146481-147249	WT	H3D_H3H	OK	660.16	2239.28	1.76215	8.09153	5e-05	0.000349444
XLOC_005499	XLOC_005499	YOL039W	chrXV:254296-254617	WT	H3D_H3H	OK	1193.35	4050.18	1.76297	7.56144	5e-05	0.000349444
XLOC_000267	XLOC_000267	YBR190W,YBR191W	chrII:605965-607140	WT	H3D_H3H	OK	792.238	2749.51	1.79517	8.06041	5e-05	0.000349444
XLOC_000745	XLOC_000745	YDL241W	chrIV:20634-21006	WT	H3D_H3H	OK	134.416	469.467	1.80432	4.6625	5e-05	0.000349444
XLOC_002697	XLOC_002697	YGL031C	chrVII:437466-437934	WT	H3D_H3H	OK	869.546	3060.82	1.81558	8.17277	5e-05	0.000349444
XLOC_004131	XLOC_004131	YLR344W	chrXII:819311-820142	WT	H3D_H3H	OK	442.876	1560.19	1.81675	6.89562	5e-05	0.000349444
XLOC_001361	XLOC_001361	YDR144C	chrIV:744310-746101	WT	H3D_H3H	OK	36.0951	127.323	1.81862	6.40977	5e-05	0.000349444
XLOC_004885	XLOC_004885	YMR116C	chrXIII:499455-500688	WT	H3D_H3H	OK	540.44	1910.25	1.82155	8.34346	5e-05	0.000349444
XLOC_005349	XLOC_005349	YNL096C	chrXIV:443397-444315	WT	H3D_H3H	OK	299.488	1063.88	1.82876	7.48574	5e-05	0.000349444
XLOC_004283	XLOC_004283	YLR062C	chrXII:263193-263954	WT	H3D_H3H	OK	824.226	2950.44	1.83982	7.61825	5e-05	0.000349444
XLOC_001941	XLOC_001941	YER102W	chrV:363099-363702	WT	H3D_H3H	OK	205.347	742.421	1.85417	7.20751	5e-05	0.000349444
XLOC_004694	XLOC_004694	YMR215W	chrXIII:696795-698370	WT	H3D_H3H	OK	36.2115	131.121	1.85638	6.2387	5e-05	0.000349444
XLOC_001749	XLOC_001749	YIL069C	chrIX:231552-232369	WT	H3D_H3H	OK	499.905	1824.63	1.86788	7.60399	5e-05	0.000349444
XLOC_002672	XLOC_002672	YGL076C	chrVII:364334-365996	WT	H3D_H3H	OK	510.485	1866.97	1.87076	8.49265	5e-05	0.000349444
XLOC_002553	XLOC_002553	YGR214W	chrVII:920574-921788	WT	H3D_H3H	OK	604.312	2255.8	1.90027	8.69586	5e-05	0.000349444
XLOC_005152	XLOC_005152	YNL067W	chrXIV:499680-500256	WT	H3D_H3H	OK	324.57	1219.25	1.90939	7.99507	5e-05	0.000349444
XLOC_002362	XLOC_002362	YGL135W	chrVII:254640-255294	WT	H3D_H3H	OK	335.541	1277.5	1.92876	8.30897	5e-05	0.000349444
XLOC_000198	XLOC_000198	YBR048W	chrII:332830-333812	WT	H3D_H3H	OK	562.234	2148.48	1.93407	8.32479	5e-05	0.000349444
XLOC_001714	XLOC_001714	YIL133C	chrIX:98526-99416	WT	H3D_H3H	OK	394.06	1543.84	1.97004	8.51127	5e-05	0.000349444
XLOC_005690	XLOC_005690	YOR315W	chrXV:904759-905800	WT	H3D_H3H	OK	40.1497	157.732	1.97401	5.89285	5e-05	0.000349444
XLOC_004192	XLOC_004192	YLR448W	chrXII:1028853-1029768	WT	H3D_H3H	OK	554.775	2198.58	1.98659	8.73174	5e-05	0.000349444
XLOC_004466	XLOC_004466	YLR406C	chrXII:931064-931755	WT	H3D_H3H	OK	766.06	3140.12	2.03529	8.39723	5e-05	0.000349444
XLOC_004158	XLOC_004158	YLR388W	chrXII:898650-898821	WT	H3D_H3H	OK	1237.75	5320.22	2.10377	5.65977	5e-05	0.000349444
XLOC_001955	XLOC_001955	YER131W	chrV:423951-424311	WT	H3D_H3H	OK	691.322	3046.54	2.13974	8.85792	5e-05	0.000349444
XLOC_001851	XLOC_001851	YEL040W	chrV:78052-79456	WT	H3D_H3H	OK	140.72	630.487	2.16364	9.44872	5e-05	0.000349444
XLOC_002546	XLOC_002546	YGR203W	chrVII:905236-905683	WT	H3D_H3H	OK	183.325	842.438	2.20016	7.52778	5e-05	0.000349444
XLOC_003590	XLOC_003590	YKL216W	chrXI:25214-26159	WT	H3D_H3H	OK	189.331	1018.49	2.42746	10.361	5e-05	0.000349444
XLOC_006324	XLOC_006324	YPL197C	chrXVI:173151-174756	WT	H3D_H3H	OK	68.6816	372.743	2.44019	4.52173	5e-05	0.000349444
XLOC_002640	XLOC_002640	YGL147C	chrVII:227753-228329	WT	H3D_H3H	OK	313.14	1917.45	2.61431	10.9871	5e-05	0.000349444
XLOC_006071	XLOC_006071	YPL198W	chrXVI:173151-174756	WT	H3D_H3H	OK	64.6871	397.648	2.61994	7.55836	5e-05	0.000349444
XLOC_001837	XLOC_001837	YEL065W	chrV:27656-29543	WT	H3D_H3H	OK	16.0568	118.107	2.87884	8.17235	5e-05	0.000349444
XLOC_002290	XLOC_002290	YGL263W	chrVII:2789-3932	WT	H3D_H3H	OK	8.10203	59.6582	2.88036	4.70645	5e-05	0.000349444
XLOC_005604	XLOC_005604	YOR153W	chrXV:619839-624375	WT	H3D_H3H	OK	112.026	930.894	3.05479	12.1096	5e-05	0.000349444
XLOC_000643	XLOC_000643	YCL064C	chrIII:15797-16880	WT	H3D_H3H	OK	74.1452	735.408	3.31012	12.414	5e-05	0.000349444
XLOC_003828	XLOC_003828	YKL102C	chrXI:248061-248367	WT	H3D_H3H	OK	0	50.0232	inf	#NAME?	5e-05	0.000349444
XLOC_002958	XLOC_002958	YHR095W	chrVIII:292942-293437	WT	H3D_H3H	OK	0	12.2642	inf	#NAME?	0.00015	0.000946235
XLOC_003173	XLOC_003173	YHR185C	chrVIII:474626-475340	WT	H3D_H3H	OK	0	5.92243	inf	#NAME?	0.0007	0.00365899
XLOC_005371	XLOC_005371	YNL031C	chrXIV:575639-576050	WT	H3D_H3H	OK	0	12.5287	inf	#NAME?	0.0009	0.00460856
XLOC_000640	XLOC_000640	YCL073C	chrIII:6478-8326	WT	H3D_H3H	OK	1.64747	0	#NAME?	#NAME?	0.00065	0.00343478

## Sheet: GO
type	GO molecular function terms	P Value
H3D_H3H_up	structural constituent of ribosome [GO:0003735]	<1e-14
	rRNA binding [GO:0019843]	<1e-14
	RNA binding [GO:0003723]	8.793e-12
H3D_H3H_down	oxidoreductase activity [GO:0016491]	<1e-14
	catalytic activity [GO:0003824]	<1e-14
	pyridoxal phosphate binding [GO:0030170]	1.293e-11
	ubiquinol-cytochrome-c reductase activity [GO:0008121]	9.376e-08
	glutathione transferase activity [GO:0004364]	3.216e-07
	aryl-alcohol dehydrogenase activity [GO:0018456]	1.22e-06
	hydrogen ion transporting ATP synthase activity, rotational mechanism [GO:0046933]	2.583e-06
	proton-transporting ATPase activity, rotational mechanism [GO:0046961]	4.303e-06
	alditol:NADP+ 1-oxidoreductase activity [GO:0004032]	4.599e-06
	amino acid transmembrane transporter activity [GO:0015171]	5.931e-06
