# Supplementary material for: Independent manipulation of histone H3 modifications in individual nucleosomes reveals the contributions of sister histones to transcription
Source: eLife. 2017 Oct 13;6:e30178. doi: 10.7554/eLife.30178 (PMC5677365; doi:10.7554/eLife.30178)
Supplement: Figure 3—source data 1. [file elife-30178-fig3-data1.xlsx]

## Sheet: Sheet1
Related to Figure 3C
H3N	Repeat 1	Repeat 2	Repeat 3
H3D/H3H	1	1	1
H3DΔ4-15/H3H	0.561723	0.366018	0.6
H3D/H3HΔ4-15	0.714656	0.498102	0.4
H3K4me3	Repeat 1	Repeat 2	Repeat 3
H3D/H3H	1	1	1
H3DΔ4-15/H3H	0.411733	0.197153	0.8
H3D/H3HΔ4-15	0.484191	0.383686	0.56
