# Supplementary material for: Independent manipulation of histone H3 modifications in individual nucleosomes reveals the contributions of sister histones to transcription
Source: eLife. 2017 Oct 13;6:e30178. doi: 10.7554/eLife.30178 (PMC5677365; doi:10.7554/eLife.30178)
Supplement: Figure 4—source data 1. [file elife-30178-fig4-data1.xlsx]

## Sheet: Sheet1
Related to Figure 4C
	Repeat 1	Repeat 2	Repeat 3	Repeat 4
H3D/H3H	1	1	1	1
H3DK4R/H3H	0.5	0.39	0.62	0.4
H3D/H3HK4R	0.63	0.37	0.62	0.32
Related to Figure 4D
0 min	Repeat 1	Repeat 2	Repeat 3
H3D/H3H	1.00005	1	0.999822
H3DK4R/H3H	0.999898	1.00003	0.99997
H3D/H3HK4R	1.00005	0.999988	0.999935
H3DK4R/H3HK4R	0.999934	0.999963	0.999978
10 min	Repeat 1	Repeat 2	Repeat 3
H3D/H3H	12.0201	7.68076	6.79317
H3DK4R/H3H	12.6222	16.1724	17.0717
H3D/H3HK4R	16.4639	12.916	13.6983
H3DK4R/H3HK4R	49.1547	46.1218	43.0309
20 min	Repeat 1	Repeat 2	Repeat 3
H3D/H3H	35.1081	22.5417	24.1916
H3DK4R/H3H	31.9487	58.4716	58.1272
H3D/H3HK4R	37.066	46.9721	47.3102
H3DK4R/H3HK4R	102.463	122.181	116.54
30 min	Repeat 1	Repeat 2	Repeat 3
H3D/H3H	61.4319	56.4744	46.8327
H3DK4R/H3H	91.662	108.339	119.616
H3D/H3HK4R	102.725	123.224	126.617
H3DK4R/H3HK4R	230.196	198.758	189.216
Related to Figure 4F
	Repeat 1	Repeat 2	Repeat 3
H3D/H3H	1	1	1
H3DK4R/H3H	0.217737	0.599719	0.521519
H3D/H3HK4R	0.110434	0.764039	0.817986
H3DK4R/H3HK4R	0.035049	0.12983	0.138006
Related to Figure 4G
	Repeat 1	Repeat 2
H3D/H3H	1	1
H3DK4R/H3H	2.09722	2.1451
H3DK4R/H3HK4R	1.90957	2.92953
H3DK4R/H3HK4R	4.8072	3.77441
Related to Figure 4H
	Repeat 1	Repeat 2	Repeat 3
H3D/H3H	1	1	1
spp1KO	Repeat 1	Repeat 2	Repeat 3
H3D/H3H	1.24416	1.28181	1.87658
H3DK4R/H3H	1.94117	1.6713	2.59382
H3D/H3HK4R	1.91684	1.47598	2.40256
H3DK4R/H3HK4R	3.20134	2.63561	3.71056
sdc1KO	Repeat 1	Repeat 2	Repeat 3
H3D/H3H	3.67685	1.96922	1.99377
H3DK4R/H3H	4.07385	2.87789	3.06349
H3D/H3HK4R	3.86865	1.84868	4.40922
H3DK4R/H3HK4R	4.0584	3.7649	4.55138
set1KO	Repeat 1	Repeat 2	Repeat 3
H3D/H3H	3.75762	2.97072	3.24539
H3DK4R/H3H	3.53069	2.58017	3.41344
H3D/H3HK4R	3.9141	2.52017	3.68459
H3DK4R/H3HK4R	3.59316	2.03398	2.78502
