# Supplementary material for: Independent manipulation of histone H3 modifications in individual nucleosomes reveals the contributions of sister histones to transcription
Source: eLife. 2017 Oct 13;6:e30178. doi: 10.7554/eLife.30178 (PMC5677365; doi:10.7554/eLife.30178)
Supplement: Figure 5—source data 1. [file elife-30178-fig5-data1.xlsx]

## Sheet: Sheet1
Related to Figure 5C
	Repeat 1	Repeat 2	Repeat 3
H3D/H3H	1	1	1
H3DK36R/H3H	0.7	0.4	0.4
H3D/H3HK36R	0.6	0.43	0.56
Related to Figure 5E
FLO8	Repeat 1	Repeat 2
H3D/H3H	1	1
H3DK36R/H3H	0.22477	0.294612
H3D/H3HK36R	0.383741	0.449865
H3DK36R/H3HK36R	0.0343089	0.0262804
PCA1	Repeat 1	Repeat 2	Repeat 3
H3D/H3H	1	1	1
H3DK36R/H3H	0.340116	0.28104	0.244799
H3D/H3HK36R	0.533574	0.356712	0.349651
H3DK36R/H3HK36R	0.02314	0.0191493	0.0218497
STE11	Repeat 1	Repeat 2	Repeat 3
H3D/H3H	1	1	1
H3DK36R/H3H	0.39543	0.301911	0.251904
H3D/H3HK36R	0.564399	0.346475	0.342438
H3DK36R/H3HK36R	0.0223684	0.0263903	0.0213195
Related to Figure 5F
FLO8	Repeat 1	Repeat 2
H3D/H3H	1	1
H3DK36R/H3H	2.68555	4.78738
H3D/H3HK36R	3.11258	3.57118
H3DK36R/H3HK36R	5.37882	8.75886
PCA1	Repeat 1	Repeat 2	Repeat 3
H3D/H3H	1	1	1
H3DK36R/H3H	2.39672	2.64622	2.38421
H3D/H3HK36R	2.52327	2.27825	2.71059
H3DK36R/H3HK36R	4.94904	5.94175	5.37757
STE11	Repeat 1	Repeat 2
H3D/H3H	1	1
H3DK36R/H3H	1.37307	1.2325
H3D/H3HK36R	1.45006	1.31027
H3DK36R/H3HK36R	3.81422	3.44794
Related to Figure 5G
	Repeat 1	Repeat 2	Repeat 3
H3D/H3H	1	1	1
set2KO FLO8	Repeat 1	Repeat 2
H3D/H3H	1.8732	2.06592
H3DK36R/H3H	2.12996	3
H3D/H3HK36R	2.37697	1.6945
H3DK36R/H3HK36R	2.09512	2.44405
set2KO PCA1	Repeat 1	Repeat 2	Repeat 3
H3D/H3H	3.24749	2.35116	2.05166
H3DK36R/H3H	3.89608	3.03707	2.53973
H3D/H3HK36R	3.62046	3.31904	2.76147
H3DK36R/H3HK36R	3.17871	2.29107	2.47121
set2KO STE11	Repeat 1	Repeat 2	Repeat 3	Repeat 4	Repeat 5
H3D/H3H	1.23743	1.62091	1.72844	1.42298	1.0898
H3DK36R/H3H	1.72223	1.47933	1.88362	1.77854	1.51179
H3D/H3HK36R	1.28853	1.28894	1.41862	1.57482	1.71409
H3DK36R/H3HK36R	1.2633	1.21861	1.47308	1.28318	1.37963
