# Supplementary material for: Independent manipulation of histone H3 modifications in individual nucleosomes reveals the contributions of sister histones to transcription
Source: eLife. 2017 Oct 13;6:e30178. doi: 10.7554/eLife.30178 (PMC5677365; doi:10.7554/eLife.30178)
Supplement: Figure 6—source data 1. [file elife-30178-fig6-data1.xlsx]

## Sheet: Sheet1
Related to Figure 6C
	Repeat 1	Repeat 2	Repeat 3
H3D/H3H	1	1	1
H3DK79R/H3H	0.4	0.5	0.7
H3D/H3HK79R	0.6	0.6	0.6
Related to Figure 6D
COS12	Repeat 1	Repeat 2	Repeat 3
H3D/H3H	1	1	1
H3DK79R/H3H	6.16181	5.27549	6.04725
H3D/H3HK79R	8.24206	3.2069	6.34875
H3DK79R/H3HK79R	9.73171	3.83044	5.89894
sir2KO H3D/H3H	6.53651	6.0945	5.56011
ERR1	Repeat 1	Repeat 2	Repeat 3
H3D/H3H	1	1	1
H3DK79R/H3H	1.21958	1.43886	3.20875
H3D/H3HK79R	1.43662	1.7235	2.43041
H3DK79R/H3HK79R	1.56078	2.34832	2.83284
sir2KO H3D/H3H	1.5541	2.411	1.23141
ERR3	Repeat 1	Repeat 2
H3D/H3H	1	1
H3DK79R/H3H	1.50208	2.30384
H3D/H3HK79R	1.73196	2.59949
H3DK79R/H3HK79R	1.86556	2.96447
sir2KO H3D/H3H	1.0467	2.25209
Related to Figure 6E
COS12	Repeat 1	Repeat 2
H3D/H3H	1	1
H3DK79R/H3H	0.488308	0.494939
H3D/H3HK79R	0.529401	0.45423
H3DK79R/H3HK79R	0.0888917	0.0812773
ERR1	Repeat 1	Repeat 2
H3D/H3H	1	1
H3DK79R/H3H	0.458347	0.623659
H3D/H3HK79R	0.408327	0.464048
H3DK79R/H3HK79R	0.0561695	0.061057
ERR3	Repeat 1	Repeat 2	Repeat 3	Repeat 4
H3D/H3H	1	1	1	1
H3DK79R/H3H	0.390523	0.438016	0.43128	0.602589
H3D/H3HK79R	0.300917	0.761523	0.371803	0.496859
H3DK79R/H3HK79R	0.0450754	0.0429548	0.0436791	0.0559919
Related to Figure 6F
COS12	Repeat 1	Repeat 2	Repeat 3
H3D/H3H	1	1	1
H3DK79R/H3H	1.84495	2.05812	1.81611
H3D/H3HK79R	1.60424	2.15514	1.76377
H3DK79R/H3HK79R	1.78049	1.88139	1.58681
ERR1	Repeat 1	Repeat 2
H3D/H3H	1	1
H3DK79R/H3H	1.5811	1.57674
H3D/H3HK79R	1.53404	1.66316
H3DK79R/H3HK79R	1.68547	1.67694
ERR3	Repeat 1	Repeat 2
H3D/H3H	1	1
H3DK79R/H3H	1.44292	1.5632
H3D/H3HK79R	1.39372	1.8425
H3DK79R/H3HK79R	1.54787	1.92598
