# Supplementary material for: Independent manipulation of histone H3 modifications in individual nucleosomes reveals the contributions of sister histones to transcription
Source: eLife. 2017 Oct 13;6:e30178. doi: 10.7554/eLife.30178 (PMC5677365; doi:10.7554/eLife.30178)
Supplement: Figure 8—source data 1. [file elife-30178-fig8-data1.xlsx]

## Sheet: Sheet1
Related to Figure 8-figure supplement 1C
YOR008C/ACT1	Repeat 1	Repeat 2	Repeat 3
H3D/H3H	2.30883	1.45139	1.8604
H3DK4R/H3H	1.30282	0.988829	0.989085
H3D/H3HK4R	1.42763	0.830422	0.893902
H3DK4R/H3HK4R	1.51762	0.95349	0.833966
H3K4me3	Repeat 1	Repeat 2
H3D/H3H	1.25723	1.2114
H3DK4R/H3H	0.703592	0.61255
H3D/H3HK4R	0.883965	0.822191
H3DK4R/H3HK4R	0.0687064	0.0735665
Related to Figure 8-figure supplement 1D
YMR315W/ACT1	Repeat 1	Repeat 2	Repeat 3
H3D/H3H	1.5065	1.93567	1.48148
H3DK4R/H3H	1.07255	1.44869	0.8053
H3D/H3HK4R	0.916188	1.64642	0.908644
H3DK4R/H3HK4R	0.707934	0.374063	0.588503
H3K4me3	Repeat 1	Repeat 2
H3D/H3H	1.88707	1.76659
H3DK4R/H3H	0.812748	0.748128
H3D/H3HK4R	1.04543	0.955133
H3DK4R/H3HK4R	0.0753074	0.0803953
Related to Figure 8-figure supplement 1E
YLR359W/ACT1	Repeat 1	Repeat 2	Repeat 3
H3D/H3H	0.853901	0.732895	0.77571
H3DK4R/H3H	0.835215	0.923426	0.847098
H3D/H3HK4R	1.01622	0.596247	0.87761
H3DK4R/H3HK4R	1.26099	1.89738	1.20549
H3K4me3	Repeat 1	Repeat 2
H3D/H3H	2.14634	1.84113
H3DK4R/H3H	1.47131	1.19706
H3D/H3HK4R	1.34636	1.22108
H3DK4R/H3HK4R	0.0615953	0.0616886
