# Supplementary material for: Independent manipulation of histone H3 modifications in individual nucleosomes reveals the contributions of sister histones to transcription
Source: eLife. 2017 Oct 13;6:e30178. doi: 10.7554/eLife.30178 (PMC5677365; doi:10.7554/eLife.30178)
Supplement: Figure 8—source data 2. [file elife-30178-fig8-data2.xlsx]

## Sheet: all_genes_p_values
test_id	ln(DH_rep1)	ln(DH_rep2)	ln(4R4R_rep1)	ln(4R4R_rep2)	alternative=two_sided	alternative=greater	alternative=less
XLOC_000512	0.566857	0.566593	1.09033	1.08646	1.37985e-05	0.999993	6.89924e-06
XLOC_000472	0.305631	0.316319	1.22754	1.23088	3.71681e-05	0.999981	1.8584e-05
XLOC_005774	0.211167	0.221922	1.44707	1.43445	4.58629e-05	0.999977	2.29314e-05
XLOC_000653	0.192018	0.201218	0.842694	0.848375	6.9405e-05	0.999965	3.47025e-05
XLOC_002227	0.680116	0.687747	0.257027	0.257857	8.09845e-05	4.04923e-05	0.99996
XLOC_000331	0.378692	0.384948	1.91517	1.88697	9.03783e-05	0.999955	4.51891e-05
XLOC_005612	0.362994	0.367328	1.0451	1.03096	0.000120786	0.99994	6.03932e-05
XLOC_001395	3.82481	3.87239	1.07524	1.03553	0.000123044	6.15219e-05	0.999938
XLOC_004185	0.252866	0.273611	1.43103	1.41307	0.000140103	0.99993	7.00517e-05
XLOC_002540	1.13658	1.12653	0.683009	0.678384	0.000150481	7.52404e-05	0.999925
XLOC_002909	2.58534	2.60094	0.800397	0.75848	0.000151994	7.59968e-05	0.999924
XLOC_000769	0.700217	0.703073	1.28901	1.27409	0.000171439	0.999914	8.57197e-05
XLOC_003292	0.348225	0.379227	1.51897	1.52066	0.000180259	0.99991	9.01295e-05
XLOC_001107	6.64752	6.53309	1.34698	1.43299	0.000189389	9.46946e-05	0.999905
XLOC_005598	6.44144	6.40618	2.48935	2.38314	0.000196856	9.84279e-05	0.999902
XLOC_005187	4.60648	4.50783	1.13319	1.14633	0.000211934	0.000105967	0.999894
XLOC_003833	0.400431	0.386172	0.935995	0.943239	0.000214199	0.999893	0.000107099
XLOC_000347	0.389774	0.385465	2.3726	2.43221	0.000219869	0.99989	0.000109935
XLOC_002311	0.2391	0.221813	0.893381	0.903192	0.000221409	0.999889	0.000110704
XLOC_001155	0.289438	0.302526	1.31546	1.34506	0.000244699	0.999878	0.00012235
XLOC_000051	1.00075	0.986053	1.62212	1.63743	0.000278091	0.999861	0.000139046
XLOC_004347	4.96567	4.95553	0.454639	0.602455	0.000279274	0.000139637	0.99986
XLOC_000510	1.14242	1.02677	4.82719	4.88306	0.000289966	0.999855	0.000144983
XLOC_000523	0.410423	0.418516	0.815781	0.804881	0.000293928	0.999853	0.000146964
XLOC_000553	0.4297	0.426142	0.622499	0.616684	0.000316117	0.999842	0.000158059
XLOC_004666	6.5013	6.72182	0.641363	0.611717	0.00034537	0.000172685	0.999827
XLOC_000242	3.44234	3.54638	0.829664	0.824619	0.000381092	0.000190546	0.999809
XLOC_000323	1.50261	1.48836	1.01268	0.999175	0.000401751	0.000200876	0.999799
XLOC_000398	0.309272	0.251628	1.71859	1.69784	0.000459998	0.99977	0.000229999
XLOC_000942	2.2077	2.1833	1.60836	1.61628	0.00048325	0.000241625	0.999758
XLOC_003130	0.173487	0.20752	1.2326	1.20253	0.000488427	0.999756	0.000244213
XLOC_000521	0.689064	0.602728	2.58819	2.58616	0.000494389	0.999753	0.000247194
XLOC_003151	6.09702	6.22171	1.429	1.25333	0.000499405	0.000249703	0.99975
XLOC_003055	0.183727	0.147557	2.08858	2.01203	0.000504192	0.999748	0.000252096
XLOC_002678	0.134143	0.114475	1.24967	1.20409	0.000506405	0.999747	0.000253202
XLOC_006510	0.275614	0.219506	2.16229	2.23052	0.000513262	0.999743	0.000256631
XLOC_000401	0.245148	0.239825	1.05147	1.0895	0.000537309	0.999731	0.000268655
XLOC_001889	0.40071	0.414782	1.23878	1.27621	0.000553225	0.999723	0.000276613
XLOC_005204	0.115069	0.0800268	0.956101	0.977426	0.000556333	0.999722	0.000278166
XLOC_004120	3.34443	3.22872	0.534384	0.467007	0.000576968	0.000288484	0.999712
XLOC_000529	0.224011	0.233743	1.10608	1.06559	0.000590049	0.999705	0.000295024
XLOC_000156	2.93673	2.98729	1.06576	1.14192	0.000604559	0.000302279	0.999698
XLOC_006321	2.53161	2.53866	0.617262	0.519893	0.000615521	0.00030776	0.999692
XLOC_000610	0.48432	0.423592	1.6642	1.67195	0.000635042	0.999682	0.000317521
XLOC_006320	1.55651	1.5843	0.805177	0.776304	0.000659941	0.000329971	0.99967
XLOC_004579	0.233052	0.187922	1.30082	1.33663	0.000674831	0.999663	0.000337416
XLOC_006167	6.72749	6.48879	0.830118	1.02804	0.000744465	0.000372232	0.999628
XLOC_000026	3.10176	3.23779	0.763735	0.777578	0.000811033	0.000405516	0.999594
XLOC_002656	0.182828	0.210005	1.38699	1.32638	0.000818385	0.999591	0.000409193
XLOC_003205	0.577008	0.537489	1.29954	1.28444	0.000827684	0.999586	0.000413842
XLOC_000146	0.789259	0.783775	2.17908	2.10101	0.000834621	0.999583	0.00041731
XLOC_000459	1.2412	1.26494	0.502986	0.53821	0.00083956	0.00041978	0.99958
XLOC_002186	0.515756	0.493983	2.21683	2.3182	0.000863828	0.999568	0.000431914
XLOC_005325	38.1939	39.6901	1.6804	0	0.000870602	0.000435301	0.999565
XLOC_003482	1.89527	1.89026	0.963643	0.906046	0.000909402	0.000454701	0.999545
XLOC_003874	2.26695	2.33526	0.901482	0.847361	0.000931662	0.000465831	0.999534
XLOC_000082	2.5069	2.58489	0.614086	0.699759	0.000939154	0.000469577	0.99953
XLOC_003602	0.186901	0.240951	1.20606	1.2363	0.000943793	0.999528	0.000471897
XLOC_005370	0.291825	0.284166	1.18813	1.13316	0.00100968	0.999495	0.000504842
XLOC_003781	1.78822	1.83296	0.960601	0.928087	0.00101763	0.000508814	0.999491
XLOC_005345	2.97011	3.09499	0.880293	0.81803	0.00101968	0.000509838	0.99949
XLOC_004192	0.27666	0.209291	1.34539	1.37105	0.00104299	0.999479	0.000521497
XLOC_001127	1.65631	1.73386	0.49973	0.495158	0.00105022	0.000525109	0.999475
XLOC_004842	2.10094	2.11572	0.782491	0.865217	0.0010684	0.000534199	0.999466
XLOC_004151	0.173954	0.231522	1.15372	1.13126	0.00107924	0.99946	0.000539618
XLOC_006304	0.369743	0.33564	0.9166	0.933395	0.00110119	0.999449	0.000550594
XLOC_006066	0.440826	0.388794	1.39965	1.36141	0.00111581	0.999442	0.000557907
XLOC_004169	5.3686	5.63442	1.35431	1.25345	0.00114493	0.000572465	0.999428
XLOC_002139	0.406473	0.465734	1.68267	1.62423	0.00116667	0.999417	0.000583333
XLOC_005513	0.589299	0.539469	1.30542	1.31713	0.00117219	0.999414	0.000586094
XLOC_001139	3.00991	3.03785	0.461141	0.276793	0.00123078	0.000615392	0.999385
XLOC_006008	0.363985	0.397511	1.6498	1.56998	0.00123804	0.999381	0.000619018
XLOC_005275	0.23803	0.207576	1.05892	1.01048	0.00123944	0.99938	0.000619722
XLOC_001500	0.547036	0.503983	1.19607	1.17693	0.00126785	0.999366	0.000633926
XLOC_000881	0.334496	0.375082	1.1042	1.06986	0.00131508	0.999342	0.000657542
XLOC_002281	0.376663	0.385484	0.906373	0.870312	0.00133629	0.999332	0.000668147
XLOC_003611	0.490533	0.435327	1.59156	1.65661	0.00134706	0.999326	0.00067353
XLOC_001750	0.186466	0.282582	1.65713	1.61944	0.00134952	0.999325	0.000674758
XLOC_003404	0.35532	0.41714	1.23881	1.25339	0.00136136	0.999319	0.000680678
XLOC_004853	0.556016	0.569723	1.99904	2.10891	0.00137548	0.999312	0.000687741
XLOC_002980	0.317354	0.411134	2.62185	2.48754	0.00139528	0.999302	0.00069764
XLOC_006074	0.696111	0.646308	1.62505	1.5763	0.00140258	0.999299	0.000701289
XLOC_005398	0.445521	0.471416	0.886152	0.868308	0.00140694	0.999297	0.000703472
XLOC_006217	0.425523	0.331026	1.68827	1.72017	0.00141146	0.999294	0.000705729
XLOC_000302	0.528043	0.475959	1.26737	1.24477	0.00141434	0.999293	0.000707171
XLOC_000706	0.298547	0.278437	1.6746	1.78166	0.00142819	0.999286	0.000714097
XLOC_000680	5.90866	5.60358	0.834464	1.03728	0.00144093	0.000720467	0.99928
XLOC_000534	0.237055	0.281211	0.991423	1.02782	0.00145032	0.999275	0.000725159
XLOC_000150	9.11986	8.48761	0.669192	0.71937	0.00152568	0.000762839	0.999237
XLOC_005140	1.48215	1.45394	0.87315	0.833321	0.00157199	0.000785997	0.999214
XLOC_004916	3.4517	3.64527	0.914388	0.988987	0.00159164	0.000795822	0.999204
XLOC_000251	0.478146	0.473549	0.759686	0.782864	0.00159554	0.999202	0.000797771
XLOC_000482	0.214532	0.257809	1.07774	1.02771	0.00163679	0.999182	0.000818397
XLOC_000463	1.49196	1.47729	0.617263	0.683747	0.0016614	0.000830698	0.999169
XLOC_000792	0.230306	0.249082	1.93112	1.7991	0.00167836	0.999161	0.000839179
XLOC_000303	0.620678	0.59776	1.92771	2.03898	0.00170469	0.999148	0.000852347
XLOC_005473	0.365663	0.314178	1.05346	1.02636	0.00172243	0.999139	0.000861217
XLOC_004750	1.92407	2.00856	0.673099	0.599687	0.00176616	0.000883081	0.999117
XLOC_000068	0.747512	0.686755	1.43741	1.44217	0.00177323	0.999113	0.000886617
XLOC_003561	0.253969	0.237644	1.03677	0.97475	0.00177557	0.999112	0.000887787
XLOC_002485	3.20159	3.06309	0.922018	0.788781	0.00177624	0.000888118	0.999112
XLOC_000573	0.294491	0.277872	0.76202	0.801623	0.00187198	0.999064	0.000935989
XLOC_000431	1.17102	1.13845	0.364149	0.300737	0.00187371	0.000936854	0.999063
XLOC_002258	1.84337	1.94735	0.696962	0.688743	0.00187564	0.00093782	0.999062
XLOC_000313	1.53073	1.48774	0.943728	0.965557	0.00188452	0.000942262	0.999058
XLOC_000078	0.72664	0.732166	0.419083	0.444701	0.00193425	0.000967123	0.999033
XLOC_001777	4.44816	4.26542	1.57034	1.72701	0.00196919	0.000984597	0.999015
XLOC_003357	0.436355	0.40384	0.788582	0.784599	0.00199127	0.999004	0.000995633
XLOC_005717	3.79362	3.96374	1.55644	1.42369	0.00203402	0.00101701	0.998983
XLOC_005119	5.25584	5.43769	1.26486	1.57272	0.00206511	0.00103256	0.998967
XLOC_003127	0	0	1.02185	1.1194	0.00206906	0.998965	0.00103453
XLOC_000866	2.78456	2.88985	0.722245	0.876727	0.00209762	0.00104881	0.998951
XLOC_005169	1.83285	1.77556	0.401774	0.512647	0.00213924	0.00106962	0.99893
XLOC_006487	0.518853	0.475111	2.12234	2.27459	0.00215991	0.99892	0.00107995
XLOC_006252	5.27661	5.67509	1.1835	1.12203	0.00216746	0.00108373	0.998916
XLOC_001196	0.36163	0.272371	2.98785	3.23277	0.0021703	0.998915	0.00108515
XLOC_001202	1.97999	2.05485	1.16321	1.12735	0.00225703	0.00112851	0.998871
XLOC_000938	2.48208	2.37541	1.25982	1.2177	0.00231375	0.00115687	0.998843
XLOC_003387	2.27394	2.43158	0.674874	0.626323	0.00233925	0.00116963	0.99883
XLOC_000145	1.51048	1.49545	0.893689	0.94821	0.00235207	0.00117603	0.998824
XLOC_001282	3.8442	3.61701	1.37233	1.31927	0.00238411	0.00119205	0.998808
XLOC_000029	0.546673	0.497585	2.20952	2.0595	0.00238737	0.998806	0.00119368
XLOC_003521	1.79975	1.79209	1.04923	0.972387	0.00241004	0.00120502	0.998795
XLOC_005757	0.286079	0.351439	1.16796	1.11927	0.00243193	0.998784	0.00121596
XLOC_000407	0.257016	0.293532	1.78202	1.64404	0.00245474	0.998773	0.00122737
XLOC_004372	0.202935	0.142706	1.83286	1.99495	0.00245692	0.998772	0.00122846
XLOC_002577	0.375952	0.404417	1.41795	1.32446	0.00247155	0.998764	0.00123578
XLOC_000380	2.52395	2.39546	1.13849	1.09878	0.00250492	0.00125246	0.998748
XLOC_004077	0.410585	0.410984	0.845279	0.891432	0.00253393	0.998733	0.00126697
XLOC_000467	0.576465	0.531043	1.00355	1.00503	0.00253414	0.998733	0.00126707
XLOC_005256	0.793358	0.801625	1.6262	1.54686	0.00254539	0.998727	0.00127269
XLOC_002915	2.35787	2.25503	1.18578	1.23197	0.00262703	0.00131352	0.998686
XLOC_002832	2.52686	2.58546	0.830006	0.651159	0.00267561	0.00133781	0.998662
XLOC_000101	1.53607	1.52049	0.664383	0.570845	0.00269972	0.00134986	0.99865
XLOC_002795	0.477975	0.494819	0.926058	0.885732	0.00270237	0.998649	0.00135119
XLOC_004731	1.51555	1.50782	0.94166	0.997969	0.0027392	0.0013696	0.99863
XLOC_005564	0.0490966	0	0.949726	0.869793	0.00279573	0.998602	0.00139787
XLOC_004165	4.98331	4.92171	1.03731	0.603031	0.00280482	0.00140241	0.998598
XLOC_004433	3.79413	3.88969	0.314121	0.659216	0.00283538	0.00141769	0.998582
XLOC_002569	1.05652	1.1446	0.276907	0.266142	0.00285212	0.00142606	0.998574
XLOC_005315	0.330885	0.378261	0.999133	1.05327	0.00285575	0.998572	0.00142788
XLOC_005439	2.45718	2.27947	0.186685	0.327133	0.00286484	0.00143242	0.998568
XLOC_005396	0.456343	0.401117	1.4771	1.38484	0.00286518	0.998567	0.00143259
XLOC_003045	1.49269	1.57782	0.6818	0.711785	0.00288447	0.00144224	0.998558
XLOC_003695	1.05977	1.07399	1.20717	1.20266	0.0029085	0.998546	0.00145425
XLOC_003367	2.07051	1.92155	0.619745	0.619224	0.00291498	0.00145749	0.998543
XLOC_002169	2.21187	2.15204	0.945955	1.05874	0.00291556	0.00145778	0.998542
XLOC_002415	1.8308	1.9086	0.784776	0.68876	0.00296136	0.00148068	0.998519
XLOC_000170	2.55126	2.47795	0.872765	0.698623	0.00297245	0.00148623	0.998514
XLOC_002403	2.70634	2.69426	0.804849	1.00107	0.00297767	0.00148883	0.998511
XLOC_003018	0.18116	0.168934	1.01599	0.929523	0.00298294	0.998509	0.00149147
XLOC_001380	5.38708	5.85227	1.36493	1.38032	0.00298909	0.00149455	0.998505
XLOC_000087	0.137305	0.131207	2.20897	2.45061	0.00301653	0.998492	0.00150826
XLOC_001278	3.02348	3.19639	0.968863	0.794795	0.00301779	0.00150889	0.998491
XLOC_000236	0.972895	0.958385	0.524575	0.4752	0.00303835	0.00151918	0.998481
XLOC_003597	5.30685	5.12093	0.532142	0.988129	0.00304222	0.00152111	0.998479
XLOC_001009	3.29959	3.54138	1.16734	1.216	0.00304741	0.0015237	0.998476
XLOC_004783	1.42856	1.5171	0.675184	0.678271	0.00308202	0.00154101	0.998459
XLOC_002357	0.438613	0.306969	2.03167	2.17208	0.00308335	0.998458	0.00154168
XLOC_005057	0.272181	0.240673	1.34506	1.46942	0.00309265	0.998454	0.00154633
XLOC_000629	2.35145	2.54256	0.736189	0.722203	0.00309648	0.00154824	0.998452
XLOC_005566	4.55074	4.35642	1.20838	0.880973	0.00310394	0.00155197	0.998448
XLOC_000547	0.255605	0.246548	1.02681	0.944857	0.00313372	0.998433	0.00156686
XLOC_001434	0.454873	0.415983	1.76052	1.6247	0.0031424	0.998429	0.0015712
XLOC_004036	2.51554	2.32301	0.573937	0.640562	0.0031453	0.00157265	0.998427
XLOC_004972	2.77468	2.66725	1.31104	1.18387	0.00317583	0.00158792	0.998412
XLOC_004585	2.34544	2.49329	1.07532	1.02966	0.00318891	0.00159445	0.998406
XLOC_002545	0.306108	0.299362	0.851049	0.792573	0.0031995	0.9984	0.00159975
XLOC_006311	3.84982	4.21076	0.864914	0.836851	0.00322567	0.00161284	0.998387
XLOC_006073	0.365572	0.247117	1.34411	1.35598	0.00323685	0.998382	0.00161842
XLOC_004057	0.0944036	0.101845	1.053	0.949713	0.00326993	0.998365	0.00163497
XLOC_005160	0.789868	0.861022	1.99887	2.1214	0.00327645	0.998362	0.00163822
XLOC_000996	2.19387	2.30186	1.01835	1.10328	0.00333227	0.00166614	0.998334
XLOC_000030	2.09126	2.23612	0.837126	0.883346	0.003385	0.0016925	0.998307
XLOC_002714	6.23385	6.86785	0.98864	0.802357	0.00339576	0.00169788	0.998302
XLOC_004578	0.814673	0.846913	1.10589	1.10554	0.00342095	0.99829	0.00171047
XLOC_000479	0.406686	0.311765	1.17968	1.16833	0.00342384	0.998288	0.00171192
XLOC_003954	0.451057	0.421737	1.20122	1.2928	0.00349978	0.99825	0.00174989
XLOC_000248	0.440741	0.208558	2.93314	2.74576	0.00350052	0.99825	0.00175026
XLOC_004704	0.458526	0.507213	1.7765	1.93316	0.00355568	0.998222	0.00177784
XLOC_002576	0.68011	0.721275	1.38932	1.32233	0.00358187	0.998209	0.00179094
XLOC_005399	2.3657	2.45403	0.834598	0.991579	0.00360094	0.00180047	0.9982
XLOC_006329	2.4992	2.40655	0.493579	0.261662	0.00360099	0.00180049	0.9982
XLOC_005525	0.338339	0.411346	1.03531	1.07241	0.00361647	0.998192	0.00180824
XLOC_000239	0.411883	0.53736	1.63708	1.5822	0.00362017	0.99819	0.00181008
XLOC_003285	0.68273	0.717306	1.34204	1.27703	0.00362851	0.998186	0.00181426
XLOC_000276	1.50598	1.53795	1.00752	0.950174	0.003633	0.0018165	0.998183
XLOC_000811	1.25507	1.17811	0.553482	0.525174	0.0036445	0.00182225	0.998178
XLOC_001531	3.19687	3.4004	0.817234	1.0234	0.00368895	0.00184447	0.998156
XLOC_006422	6.91211	7.49065	0.832936	1.31022	0.00372171	0.00186085	0.998139
XLOC_003939	2.28682	2.4157	1.22321	1.1644	0.00372383	0.00186192	0.998138
XLOC_004805	2.25952	2.2848	1.20066	1.32191	0.00373187	0.00186594	0.998134
XLOC_000306	0.902253	0.746097	2.15697	2.21624	0.00373616	0.998132	0.00186808
XLOC_006086	0.361099	0.357742	1.7244	1.56662	0.00374309	0.998128	0.00187154
XLOC_004113	1.16755	1.1077	0.579165	0.541082	0.00375134	0.00187567	0.998124
XLOC_004062	0.288684	0.328204	1.20609	1.31784	0.00384138	0.998079	0.00192069
XLOC_003855	3.9132	4.25849	1.19716	1.27638	0.00384292	0.00192146	0.998079
XLOC_000322	0.345391	0.435809	2.09564	1.91606	0.00385112	0.998074	0.00192556
XLOC_006165	0.924768	0.84943	1.51647	1.54377	0.00385991	0.99807	0.00192995
XLOC_003651	3.50595	3.8798	0.620056	0.686821	0.0038801	0.00194005	0.99806
XLOC_005182	0.730762	0.671396	1.1765	1.17507	0.00388932	0.998055	0.00194466
XLOC_002034	0.277497	0.290928	1.04755	0.958571	0.003895	0.998052	0.0019475
XLOC_001906	1.01053	0.963022	0.546525	0.571496	0.00391271	0.00195635	0.998044
XLOC_000007	1.74913	1.94091	0.322568	0.295016	0.00395305	0.00197652	0.998023
XLOC_000907	2.63421	2.91477	0.562243	0.550625	0.00398286	0.00199143	0.998009
XLOC_004236	0.294316	0.275695	1.08225	0.989038	0.00398522	0.998007	0.00199261
XLOC_000519	0.397081	0.467808	1.04126	1.07772	0.00400146	0.997999	0.00200073
XLOC_000177	0.619391	0.566242	1.79368	1.65967	0.00401734	0.997991	0.00200867
XLOC_002806	0.360355	0.254465	1.3975	1.49682	0.00403181	0.997984	0.0020159
XLOC_003310	0.570455	0.53074	1.28753	1.20745	0.00408852	0.997956	0.00204426
XLOC_002445	1.60476	1.74778	0.550683	0.563375	0.00408924	0.00204462	0.997955
XLOC_006097	0.677461	0.593546	1.3469	1.38963	0.00410351	0.997948	0.00205176
XLOC_006397	3.31966	3.08649	1.27478	1.17263	0.00410943	0.00205472	0.997945
XLOC_001484	5.6303	5.97095	0.930021	1.41794	0.00411023	0.00205512	0.997945
XLOC_000761	1.63129	1.47633	0.254709	0.307635	0.00411329	0.00205664	0.997943
XLOC_006477	7.39744	7.17118	1.05563	0.229314	0.00413384	0.00206692	0.997933
XLOC_005506	3.45435	3.17732	1.1266	1.16804	0.00414543	0.00207271	0.997927
XLOC_002013	2.45207	2.43098	0.952556	1.13228	0.00415617	0.00207809	0.997922
XLOC_000419	0.993083	1.02411	0.56738	0.612332	0.00422688	0.00211344	0.997887
XLOC_000137	0.461645	0.448609	0.976993	0.914259	0.00423898	0.997881	0.00211949
XLOC_000267	0.42451	0.322488	1.41335	1.51294	0.00425235	0.997874	0.00212618
XLOC_000352	4.42926	4.89771	1.05813	1.09436	0.00426147	0.00213074	0.997869
XLOC_002441	0.226575	0.271034	0.807086	0.870323	0.0042656	0.997867	0.0021328
XLOC_001407	7.34958	8.00289	1.02323	0.384385	0.00426623	0.00213312	0.997867
XLOC_000464	0.179972	0.131254	0.895912	0.817583	0.00429931	0.99785	0.00214966
XLOC_002916	1.39597	1.48828	0.598091	0.653066	0.00430091	0.00215045	0.99785
XLOC_001002	1.71054	1.86607	0.581511	0.608008	0.00433971	0.00216986	0.99783
XLOC_004934	0.302702	0.242726	0.789252	0.760246	0.00437383	0.997813	0.00218692
XLOC_003448	0.46484	0.527708	1.5017	1.39227	0.00437664	0.997812	0.00218832
XLOC_001935	0.306115	0.266853	1.19221	1.08459	0.00449034	0.997755	0.00224517
XLOC_003461	6.002	6.60137	1.86975	1.81694	0.00452257	0.00226128	0.997739
XLOC_000494	1.32988	1.45034	0.500562	0.485305	0.00454733	0.00227366	0.997726
XLOC_003673	3.5963	3.26416	0.693197	0.501477	0.00455042	0.00227521	0.997725
XLOC_005560	0.621793	0.559716	1.37327	1.29404	0.00455804	0.997721	0.00227902
XLOC_001456	0.403154	0.356533	1.72672	1.5617	0.00456691	0.997717	0.00228346
XLOC_000843	0.35634	0.339804	0.796279	0.859417	0.00459465	0.997703	0.00229732
XLOC_006402	4.99484	5.33985	0.904704	0.395695	0.00460086	0.00230043	0.9977
XLOC_001492	0.408599	0.496898	1.45233	1.35737	0.00460525	0.997697	0.00230262
XLOC_001703	0.524981	0.390787	1.53455	1.60592	0.00463549	0.997682	0.00231774
XLOC_001291	1.87514	1.75822	0.945097	0.963112	0.00466946	0.00233473	0.997665
XLOC_000257	0.346799	0.213611	1.33635	1.40443	0.00467328	0.997663	0.00233664
XLOC_000260	2.64613	2.51797	0.662663	0.410644	0.00474278	0.00237139	0.997629
XLOC_005441	1.02366	1.07911	0.570547	0.528891	0.0047439	0.00237195	0.997628
XLOC_000485	0.447856	0.351762	1.43335	1.54991	0.0047516	0.997624	0.0023758
XLOC_001200	0.446069	0.423806	1.24176	1.13948	0.00476216	0.997619	0.00238108
XLOC_005250	0.316938	0.312386	0.886215	0.812181	0.00477932	0.99761	0.00238966
XLOC_001810	1.32427	1.46193	0.337233	0.268227	0.00494896	0.00247448	0.997526
XLOC_002959	4.61177	4.81094	1.43088	0.97604	0.00497163	0.00248581	0.997514
XLOC_001033	0.586577	0.461093	1.83481	1.71025	0.00497518	0.997512	0.00248759
XLOC_000644	0.191977	0.294301	1.26127	1.37395	0.00497918	0.99751	0.00248959
XLOC_006362	2.60879	2.82506	1.0882	1.15406	0.00498015	0.00249008	0.99751
XLOC_002735	1.34817	1.43736	0.707396	0.739782	0.00498948	0.00249474	0.997505
XLOC_001159	2.19575	2.40652	0.774009	0.812971	0.00501471	0.00250735	0.997493
XLOC_004890	5.32106	4.85168	1.20821	0.874379	0.00503061	0.0025153	0.997485
XLOC_001056	0.227264	0.321928	1.44178	1.59158	0.00505003	0.997475	0.00252502
XLOC_001767	1.08399	1.05007	0.822038	0.810543	0.00506252	0.00253126	0.997469
XLOC_000387	1.50444	1.40991	0.655186	0.581272	0.00507556	0.00253778	0.997462
XLOC_003221	0.404305	0.380822	1.00126	1.09228	0.00512156	0.997439	0.00256078
XLOC_000043	0.160312	0.101116	0.569258	0.551344	0.00514182	0.997429	0.00257091
XLOC_005935	0.140734	0.143506	1.33698	1.52235	0.00514327	0.997428	0.00257163
XLOC_000403	0.400968	0.413228	0.932557	1.01311	0.00514611	0.997427	0.00257305
XLOC_002858	0.396095	0.306123	1.04408	1.09551	0.00515819	0.997421	0.0025791
XLOC_002278	0.391176	0.303485	1.46758	1.34262	0.00516695	0.997417	0.00258347
XLOC_001600	2.63544	2.81065	0.747225	0.95332	0.00517559	0.0025878	0.997412
XLOC_000469	0.626744	0.583905	0.910226	0.902527	0.00518504	0.997407	0.00259252
XLOC_003820	0.44504	0.385172	1.02618	0.966423	0.00525377	0.997373	0.00262688
XLOC_004602	0.55798	0.453323	1.27098	1.31833	0.00525719	0.997371	0.00262859
XLOC_005570	4.24842	4.66476	1.55035	1.61241	0.00531588	0.00265794	0.997342
XLOC_000899	0.508171	0.459384	1.26223	1.16699	0.0053163	0.997342	0.00265815
XLOC_000578	0.387656	0.312652	0.984291	0.935606	0.00533274	0.997334	0.00266637
XLOC_004446	0.241467	0.359854	1.10516	1.11907	0.00535152	0.997324	0.00267576
XLOC_000930	0.305496	0.231431	1.14732	1.26359	0.00536802	0.997316	0.00268401
XLOC_000425	1.18709	1.18107	0.847369	0.794087	0.00540048	0.00270024	0.9973
XLOC_003919	0.335348	0.176318	1.47269	1.40008	0.00543776	0.997281	0.00271888
XLOC_000074	0.783242	0.778919	1.40604	1.5059	0.0054396	0.99728	0.0027198
XLOC_001410	3.55331	3.99841	0.782	0.723231	0.00546808	0.00273404	0.997266
XLOC_003485	12.295	10.6703	0.589541	0.512423	0.00548883	0.00274441	0.997256
XLOC_001695	1.56342	1.6148	0.70569	0.817829	0.00551098	0.00275549	0.997245
XLOC_000229	2.4003	2.59192	0.840838	0.665046	0.00551735	0.00275867	0.997241
XLOC_000672	1.58508	1.50022	0.938498	0.963436	0.00553967	0.00276984	0.99723
XLOC_001530	2.03417	2.18126	1.0598	0.992001	0.00555646	0.00277823	0.997222
XLOC_006434	0.764119	0.670474	1.34582	1.36531	0.00556756	0.997216	0.00278378
XLOC_004921	2.61538	2.75408	0.533599	0.215388	0.00559685	0.00279842	0.997202
XLOC_002106	0.307359	0.40053	2.14092	1.90734	0.00561992	0.99719	0.00280996
XLOC_001699	2.24319	2.44274	1.00126	0.950749	0.00562142	0.00281071	0.997189
XLOC_006072	1.17552	1.10827	0.602896	0.550449	0.00564317	0.00282158	0.997178
XLOC_003607	0.567546	0.463623	1.3208	1.39447	0.00567297	0.997164	0.00283649
XLOC_000319	2.73288	2.84236	1.40637	1.57017	0.00569887	0.00284943	0.997151
XLOC_005720	4.314	4.52704	0.499476	1.01308	0.00570752	0.00285376	0.997146
XLOC_002995	0.263644	0.204622	1.23169	1.38355	0.00570914	0.997145	0.00285457
XLOC_003590	0.564571	0.526069	1.61536	1.78665	0.00572045	0.99714	0.00286022
XLOC_002347	8.03134	9.32232	0.234745	0.123841	0.00576262	0.00288131	0.997119
XLOC_003994	2.61693	2.48878	1.26	1.09358	0.00577438	0.00288719	0.997113
XLOC_002069	1.59094	1.76722	0.47581	0.515547	0.00577843	0.00288922	0.997111
XLOC_000192	1.58327	1.51553	0.629603	0.494822	0.00578666	0.00289333	0.997107
XLOC_004560	0.15053	0.182232	0.91833	1.03837	0.00579446	0.997103	0.00289723
XLOC_000262	1.23628	1.31107	0.645993	0.6994	0.00579576	0.00289788	0.997102
XLOC_000801	4.12194	4.3675	1.1861	1.55108	0.00579738	0.00289869	0.997101
XLOC_000106	0.50493	0.403308	1.27827	1.21245	0.00580296	0.997099	0.00290148
XLOC_001656	0.597556	0.540599	0.957279	0.979476	0.00580822	0.997096	0.00290411
XLOC_005587	0.187793	0.205917	1.21605	1.07169	0.00584959	0.997075	0.00292479
XLOC_004617	0.187212	0.134251	1.83136	1.59846	0.00585224	0.997074	0.00292612
XLOC_002271	0.396034	0.270021	1.15009	1.15699	0.00586235	0.997069	0.00293118
XLOC_005330	4.29832	4.82752	1.08657	0.950021	0.00589082	0.00294541	0.997055
XLOC_000787	6.10784	6.87468	1.13679	1.38793	0.00590103	0.00295051	0.997049
XLOC_000946	0.584908	0.414935	1.78971	1.69917	0.0059333	0.997033	0.00296665
XLOC_000754	2.00067	2.17432	0.607385	0.740548	0.00593833	0.00296916	0.997031
XLOC_003522	0.450355	0.483428	0.841865	0.79824	0.00595377	0.997023	0.00297688
XLOC_003459	0.429365	0.455755	1.13467	1.03797	0.00600546	0.996997	0.00300273
XLOC_001973	0.706339	0.641813	1.86968	2.0609	0.00605179	0.996974	0.0030259
XLOC_002293	1.37631	1.20146	0.15724	0.110917	0.00607767	0.00303883	0.996961
XLOC_000474	2.99352	3.40536	0.568252	0.495528	0.00608878	0.00304439	0.996956
XLOC_000179	1.04087	1.11875	0.492833	0.535418	0.00609859	0.0030493	0.996951
XLOC_001178	1.15902	1.13991	0.968057	0.944498	0.00610748	0.00305374	0.996946
XLOC_000126	0.516335	0.196291	3.34488	3.03501	0.006122	0.996939	0.003061
XLOC_002880	0.425852	0.548567	1.43213	1.35909	0.00612203	0.996939	0.00306102
XLOC_005354	2.67028	2.84954	1.1419	0.939299	0.00613211	0.00306605	0.996934
XLOC_002671	0.291211	0.275866	2.46643	2.14836	0.00613242	0.996934	0.00306621
XLOC_005943	0.478664	0.598268	1.29631	1.30319	0.00613415	0.996933	0.00306707
XLOC_001539	1.12761	1.14068	1.61472	1.69572	0.00614142	0.996929	0.00307071
XLOC_000631	0.301832	0.207685	1.35	1.50973	0.00616651	0.996917	0.00308325
XLOC_002798	0.724357	0.75152	1.31762	1.23696	0.00616824	0.996916	0.00308412
XLOC_006345	2.4899	2.66253	1.3679	1.43573	0.00617787	0.00308893	0.996911
XLOC_003071	6.73691	7.77487	0.687393	0.68273	0.00618055	0.00309028	0.99691
XLOC_006313	2.13251	1.99012	0.696033	0.51508	0.00619615	0.00309807	0.996902
XLOC_000376	0.607534	0.584064	2.02476	1.81653	0.00619669	0.996902	0.00309835
XLOC_003252	8.58697	7.91151	2.18328	1.41733	0.00621095	0.00310547	0.996895
XLOC_000552	0.63567	0.598105	0.860109	0.853387	0.00626891	0.996866	0.00313446
XLOC_006036	1.58733	1.58814	0.409167	0.205434	0.00626982	0.00313491	0.996865
XLOC_004156	0.371843	0.343537	1.80788	2.05729	0.00629088	0.996855	0.00314544
XLOC_003324	0.718119	0.819038	1.41742	1.40035	0.0063273	0.996836	0.00316365
XLOC_002703	0.323222	0.296551	1.29781	1.46774	0.00636457	0.996818	0.00318228
XLOC_002130	0.195888	0.186706	1.1587	1.01451	0.00644765	0.996776	0.00322383
XLOC_002358	0.630872	0.631307	0.974897	1.03525	0.00644813	0.996776	0.00322407
XLOC_005085	0.248428	0.233142	1.40572	1.23231	0.00645357	0.996773	0.00322678
XLOC_000440	0.310291	0.286476	1.17499	1.04602	0.00645711	0.996771	0.00322856
XLOC_002036	0.273052	0.331532	0.777873	0.834708	0.00648152	0.996759	0.00324076
XLOC_004281	0.381143	0.309457	1.34274	1.21009	0.00649202	0.996754	0.00324601
XLOC_001615	9.87848	11.2801	0.39577	1.14448	0.0064972	0.0032486	0.996751
XLOC_003709	3.30006	3.49836	1.24801	0.929878	0.00651816	0.00325908	0.996741
XLOC_004006	0.538121	0.394353	1.36383	1.40416	0.00655255	0.996724	0.00327628
XLOC_006482	0.272153	0.234529	2.07421	1.80262	0.00655391	0.996723	0.00327696
XLOC_000358	1.98927	2.13336	0.995486	0.883084	0.00656666	0.00328333	0.996717
XLOC_001086	0.350581	0.438379	1.07791	1.1563	0.00656721	0.996716	0.0032836
XLOC_000589	0.936167	0.960897	0.685203	0.646222	0.00659497	0.00329749	0.996703
XLOC_005338	1.76657	1.83581	0.897319	1.01671	0.00661569	0.00330784	0.996692
XLOC_006388	0.222428	0.152634	1.82326	1.585	0.00663349	0.996683	0.00331674
XLOC_002288	2.81489	2.58772	0.148528	0.468488	0.0066564	0.0033282	0.996672
XLOC_001336	0.313511	0.36446	2.50656	2.18151	0.0066645	0.996668	0.00333225
XLOC_006203	1.92964	2.0451	0.746674	0.55995	0.00670255	0.00335127	0.996649
XLOC_003154	2.84823	3.18046	0.956607	0.856473	0.00670706	0.00335353	0.996646
XLOC_000989	4.51968	4.42429	1.66345	1.1677	0.00675185	0.00337593	0.996624
XLOC_000724	0.316229	0.313948	0.848279	0.944307	0.00675933	0.99662	0.00337966
XLOC_000831	0.357375	0.221245	1.17638	1.24549	0.00679005	0.996605	0.00339503
XLOC_000416	6.40643	7.30297	1.47578	1.40763	0.00682721	0.0034136	0.996586
XLOC_000012	1.9176	2.14892	0.647652	0.605963	0.00690967	0.00345483	0.996545
XLOC_003406	2.8577	3.09801	0.901552	0.617735	0.00695352	0.00347676	0.996523
XLOC_005483	0.274426	0.349942	0.797005	0.835063	0.0069687	0.996516	0.00348435
XLOC_004772	3.3818	3.88931	0.596523	0.486204	0.00696998	0.00348499	0.996515
XLOC_004758	0.283494	0.215089	1.60996	1.84973	0.00701586	0.996492	0.00350793
XLOC_001938	4.38681	3.99351	1.09622	1.39848	0.00702822	0.00351411	0.996486
XLOC_001168	0.970159	0.821589	1.91551	2.01855	0.00704776	0.996476	0.00352388
XLOC_003352	0.400463	0.300902	0.943114	0.938592	0.00705415	0.996473	0.00352708
XLOC_005998	2.30845	2.62942	0.530345	0.573581	0.00706051	0.00353026	0.99647
XLOC_006101	4.03996	4.63585	0.805719	0.816045	0.00706245	0.00353123	0.996469
XLOC_004309	2.16386	2.22959	0.981279	1.15997	0.00707105	0.00353553	0.996464
XLOC_005432	1.64886	1.80492	0.346892	0.151273	0.0070921	0.00354605	0.996454
XLOC_000460	1.40886	1.47935	0.737514	0.629258	0.00713238	0.00356619	0.996434
XLOC_000875	0.385046	0.427623	0.775457	0.734199	0.00715793	0.996421	0.00357897
XLOC_002212	3.95271	4.41951	1.33965	1.15848	0.00718796	0.00359398	0.996406
XLOC_004085	3.05296	3.42699	0.898104	1.0089	0.00719846	0.00359923	0.996401
XLOC_004724	1.56205	1.67221	0.961588	0.930036	0.0072054	0.0036027	0.996397
XLOC_001373	0.331211	0.21062	1.17958	1.29216	0.00722818	0.996386	0.00361409
XLOC_002738	3.14754	3.39765	0.6047	0.950474	0.00723454	0.00361727	0.996383
XLOC_005611	0.325243	0.26181	1.87551	2.16418	0.00724817	0.996376	0.00362409
XLOC_003759	2.80691	2.49835	0.814988	0.720334	0.00724989	0.00362494	0.996375
XLOC_001496	1.63514	1.62954	0.732946	0.875503	0.00733845	0.00366923	0.996331
XLOC_000714	3.17842	3.09563	1.7794	1.53802	0.00736682	0.00368341	0.996317
XLOC_005142	1.5957	1.72388	0.835243	0.7589	0.00739364	0.00369682	0.996303
XLOC_003201	2.86075	3.08922	0.634558	0.936744	0.00740231	0.00370116	0.996299
XLOC_005249	0.53457	0.512518	1.07133	1.17257	0.00741281	0.996294	0.0037064
XLOC_002814	2.24882	2.51493	0.645263	0.762112	0.00741518	0.00370759	0.996292
XLOC_001399	3.64836	3.8148	0.845415	1.27714	0.00742273	0.00371136	0.996289
XLOC_001606	1.70451	1.72681	0.607737	0.39882	0.00742459	0.0037123	0.996288
XLOC_005986	0.453994	0.527717	1.27582	1.40336	0.00744772	0.996276	0.00372386
XLOC_002001	1.876	1.74076	0.988091	0.927836	0.00749259	0.0037463	0.996254
XLOC_004847	0.172717	0.135436	1.55716	1.33529	0.00749352	0.996253	0.00374676
XLOC_000139	4.39672	4.04923	1.35452	0.947489	0.00750241	0.00375121	0.996249
XLOC_000326	1.51926	1.66879	0.64421	0.702742	0.00752157	0.00376078	0.996239
XLOC_004768	0.122462	0.0173405	0.948751	1.07508	0.00752362	0.996238	0.00376181
XLOC_000084	0.541454	0.471006	1.69749	1.51853	0.00753198	0.996234	0.00376599
XLOC_003332	0.438065	0.415676	0.614184	0.641197	0.00754449	0.996228	0.00377224
XLOC_002363	3.37673	3.14229	1.56342	1.3533	0.00755123	0.00377561	0.996224
XLOC_003971	1.39934	1.44444	0.753271	0.851846	0.00757173	0.00378587	0.996214
XLOC_004688	4.04832	4.62934	1.00357	1.03063	0.00757847	0.00378924	0.996211
XLOC_002784	2.25031	2.55514	0.669093	0.642505	0.00758298	0.00379149	0.996209
XLOC_005719	4.14469	4.81241	0.519088	0.255805	0.00760717	0.00380359	0.996196
XLOC_002136	1.37781	1.35502	0.598101	0.720094	0.00760851	0.00380426	0.996196
XLOC_001949	1.48369	1.4772	0.695144	0.821979	0.00764926	0.00382463	0.996175
XLOC_002670	0.343023	0.209192	1.91673	2.20109	0.00767952	0.99616	0.00383976
XLOC_006180	4.19126	4.80342	0.998143	1.04781	0.00772172	0.00386086	0.996139
XLOC_002219	1.71212	1.70748	0.718283	0.525131	0.00779042	0.00389521	0.996105
XLOC_000080	0.375469	0.35899	3.20267	2.73999	0.00780973	0.996095	0.00390486
XLOC_006229	1.50577	1.70178	0.455483	0.498856	0.0078452	0.0039226	0.996077
XLOC_002617	6.74943	7.48419	1.42593	0.620637	0.00790643	0.00395321	0.996047
XLOC_005059	0.317997	0.133156	1.29782	1.36959	0.00790958	0.996045	0.00395479
XLOC_000538	0.674481	0.591177	1.42535	1.55493	0.00797555	0.996012	0.00398778
XLOC_003667	2.87069	3.02427	0.612951	0.971919	0.00810645	0.00405323	0.995947
XLOC_002497	5.23506	5.7981	1.56003	1.04127	0.00814364	0.00407182	0.995928
XLOC_000623	1.79939	1.60104	0.595234	0.541221	0.00814438	0.00407219	0.995928
XLOC_004787	0.474003	0.432443	1.16802	1.30439	0.00818601	0.995907	0.00409301
XLOC_000991	0.759262	0.684297	1.17946	1.14923	0.00823688	0.995882	0.00411844
XLOC_000902	2.56372	2.92368	0.720378	0.779421	0.00826444	0.00413222	0.995868
XLOC_002591	2.01323	2.12643	1.28974	1.18819	0.00827176	0.00413588	0.995864
XLOC_000709	0.39802	0.331361	1.2148	1.37112	0.00827487	0.995863	0.00413744
XLOC_006080	2.02954	1.83011	0.704891	0.578063	0.00830872	0.00415436	0.995846
XLOC_004090	2.44393	2.35011	1.24276	1.03112	0.00833292	0.00416646	0.995834
XLOC_001101	2.9324	3.3211	0.965655	0.837012	0.0083561	0.00417805	0.995822
XLOC_000011	2.56418	2.86226	1.07014	1.10853	0.00845493	0.00422746	0.995773
XLOC_000375	0.37236	0.523541	2.63606	2.29453	0.00846074	0.99577	0.00423037
XLOC_001623	0.301382	0.249257	0.790339	0.718517	0.00846849	0.995766	0.00423425
XLOC_002716	0.686876	0.712361	0.890536	0.868958	0.00848297	0.995759	0.00424148
XLOC_003096	0.484664	0.430974	0.973087	1.06191	0.00848817	0.995756	0.00424409
XLOC_000099	0.365052	0.257874	0.920135	0.892909	0.00852322	0.995738	0.00426161
XLOC_004007	2.41467	2.37178	1.4246	1.23107	0.00854358	0.00427179	0.995728
XLOC_005041	4.64631	3.91054	0.341497	0.274204	0.00854539	0.00427269	0.995727
XLOC_004597	3.37645	3.79758	1.29821	1.1802	0.00856394	0.00428197	0.995718
XLOC_005574	5.4218	6.36032	0.666772	0.849822	0.00856507	0.00428253	0.995717
XLOC_006141	4.91662	5.53472	0.669756	0	0.00856979	0.00428489	0.995715
XLOC_001759	8.30244	9.71068	1.24536	0.742533	0.00859464	0.00429732	0.995703
XLOC_000340	0.577103	0.587661	1.2488	1.13538	0.00861297	0.995694	0.00430649
XLOC_003765	1.94254	2.18339	0.779358	0.764163	0.00862014	0.00431007	0.99569
XLOC_004443	1.13595	1.3975	3.15881	2.94844	0.00870594	0.995647	0.00435297
XLOC_001983	1.48097	1.64089	0.666636	0.705117	0.00871736	0.00435868	0.995641
XLOC_004178	1.96587	2.00516	1.27266	1.13064	0.00871926	0.00435963	0.99564
XLOC_000320	1.33933	1.42816	0.912327	0.910231	0.00872662	0.00436331	0.995637
XLOC_005478	1.98414	1.76413	0.572691	0.438301	0.00875463	0.00437732	0.995623
XLOC_002763	3.02411	3.47931	0.721675	0.526901	0.0087612	0.0043806	0.995619
XLOC_005311	0.672993	0.615659	1.07319	1.02312	0.00876528	0.995617	0.00438264
XLOC_001943	2.92311	3.3306	0.751804	0.514264	0.00882484	0.00441242	0.995588
XLOC_005333	5.54188	6.06261	1.12513	1.76482	0.00884028	0.00442014	0.99558
XLOC_000158	3.618	3.24869	1.357	1.4601	0.00884638	0.00442319	0.995577
XLOC_004781	0.220614	0.180295	1.38078	1.62465	0.00888742	0.995556	0.00444371
XLOC_003289	2.4512	2.83567	0.437041	0.568801	0.00889246	0.00444623	0.995554
XLOC_000153	3.10295	2.78065	0.914635	1.09241	0.00889547	0.00444773	0.995552
XLOC_001522	0.382892	0.332729	1.01891	1.14719	0.0088968	0.995552	0.0044484
XLOC_003541	0.245384	0.156293	0.837991	0.766479	0.00890106	0.995549	0.00445053
XLOC_006460	6.55861	5.56879	0.864999	0.860679	0.00893433	0.00446716	0.995533
XLOC_006310	0.337696	0.383737	2.66704	2.26831	0.00895115	0.995524	0.00447558
XLOC_004143	0.281224	0	1.61051	1.62962	0.00895329	0.995523	0.00447664
XLOC_006290	0.36619	0.411205	0.97985	1.0952	0.00898283	0.995509	0.00449142
XLOC_005569	2.13789	2.01716	1.44013	1.44879	0.00901568	0.00450784	0.995492
XLOC_000098	0.142336	0.16108	0.8429	0.723474	0.00903803	0.995481	0.00451901
XLOC_000157	0.449114	0.539919	0.986789	0.968809	0.00904757	0.995476	0.00452378
XLOC_000330	1.41465	1.34207	1.77294	1.75781	0.00905133	0.995474	0.00452567
XLOC_000491	0.773738	0.664527	1.47388	1.58431	0.00906758	0.995466	0.00453379
XLOC_003043	0.232041	0.192878	0.865574	0.757377	0.00909908	0.99545	0.00454954
XLOC_004771	2.09765	1.95402	0.75706	0.533142	0.00915321	0.0045766	0.995423
XLOC_000423	0.350177	0.283239	1.58281	1.36952	0.00916642	0.995417	0.00458321
XLOC_006355	0.651628	0.704831	1.01645	1.06135	0.00918508	0.995407	0.00459254
XLOC_003458	2.16612	2.02052	3.7698	3.50906	0.00919845	0.995401	0.00459923
XLOC_000616	3.79641	4.37469	1.09813	1.08704	0.00920754	0.00460377	0.995396
XLOC_005014	0.413112	0.399622	1.58539	1.83729	0.00921292	0.995394	0.00460646
XLOC_000304	0.850982	0.936954	1.7965	1.96736	0.00924037	0.99538	0.00462018
XLOC_000406	0.492506	0.563094	1.69651	1.93633	0.00927772	0.995361	0.00463886
XLOC_000169	2.20091	2.33302	0.71858	0.962043	0.00929331	0.00464665	0.995353
XLOC_000138	0.307257	0.188157	0.866952	0.858374	0.00929457	0.995353	0.00464728
XLOC_003493	6.53033	5.53831	0.950879	0.844205	0.00930044	0.00465022	0.99535
XLOC_001125	3.07995	2.95534	0.963027	0.540887	0.00930353	0.00465176	0.995348
XLOC_001631	3.47792	3.88221	1.37127	1.5275	0.00930678	0.00465339	0.995347
XLOC_006002	1.84752	1.99498	1.13946	1.16438	0.00931566	0.00465783	0.995342
XLOC_000391	1.25961	1.1153	0.420698	0.365648	0.00932155	0.00466077	0.995339
XLOC_005185	2.80109	3.23469	0.69588	0.515664	0.00934145	0.00467072	0.995329
XLOC_003026	0.451718	0.27837	2.05361	2.36843	0.00934347	0.995328	0.00467173
XLOC_001583	0.476771	0.40357	1.03925	1.14272	0.0093492	0.995325	0.0046746
XLOC_003320	1.91317	2.20333	0.564482	0.572541	0.00935805	0.00467903	0.995321
XLOC_002622	2.08064	2.40964	0.568445	0.541101	0.00940194	0.00470097	0.995299
XLOC_004219	0.569825	0.414365	1.30837	1.28423	0.00943224	0.995284	0.00471612
XLOC_001121	3.67564	4.2172	1.13804	1.19908	0.00948593	0.00474296	0.995257
XLOC_001088	0.566843	0.484253	1.2477	1.37872	0.00952803	0.995236	0.00476402
XLOC_004636	0.376245	0.25058	0.955818	0.94933	0.00955108	0.995224	0.00477554
XLOC_004356	0.41223	0.322639	0.845334	0.886169	0.00961912	0.99519	0.00480956
XLOC_005258	10.0395	11.7608	0.702327	1.57331	0.00962112	0.00481056	0.995189
XLOC_003346	2.19264	2.10099	0.943228	1.14132	0.00962193	0.00481097	0.995189
XLOC_002857	0.331537	0.464692	1.1148	1.077	0.00969456	0.995153	0.00484728
XLOC_003690	2.10846	1.85164	0.50359	0.618901	0.00970014	0.00485007	0.99515
XLOC_005180	0.437173	0.381139	1.14825	1.30008	0.00971365	0.995143	0.00485682
XLOC_001084	0.472388	0.331323	1.23982	1.16559	0.00975931	0.99512	0.00487965
XLOC_005155	2.41026	2.76842	0.784242	0.796221	0.00977334	0.00488667	0.995113
XLOC_001325	0.294423	0.198687	0.845441	0.930134	0.00978821	0.995106	0.0048941
XLOC_005279	3.21648	3.58994	0.984139	1.24636	0.00979889	0.00489944	0.995101
XLOC_000807	2.17745	2.33331	0.583168	0.847905	0.00980491	0.00490245	0.995098
XLOC_000259	0.25008	0.191782	0.530287	0.55788	0.0098126	0.995094	0.0049063
XLOC_000167	1.05157	0.993183	0.55451	0.471145	0.00982728	0.00491364	0.995086
XLOC_005664	0.525001	0.382003	1.23981	1.32318	0.00984369	0.995078	0.00492184
XLOC_003609	2.54173	2.93658	0.76427	0.684618	0.00984578	0.00492289	0.995077
XLOC_000990	1.77363	1.72404	1.07693	0.937118	0.00985092	0.00492546	0.995075
XLOC_003364	3.19988	3.32616	0.886131	0.374701	0.0098623	0.00493115	0.995069
XLOC_001586	3.22551	3.25712	0.56664	1.05235	0.00986747	0.00493374	0.995066
XLOC_001264	1.16384	1.21515	0.933851	0.924272	0.00989014	0.00494507	0.995055
XLOC_003365	0.495407	0.359292	1.10126	1.1126	0.00994862	0.995026	0.00497431
XLOC_004911	3.28006	3.79024	0.95038	1.01084	0.00996059	0.00498029	0.99502
XLOC_000124	1.19021	1.31311	0.589307	0.521286	0.01002	0.00501	0.99499
XLOC_003300	4.09683	4.50764	1.0968	0.523857	0.0100373	0.00501863	0.994981
XLOC_000295	0.451274	0.455077	0.898449	0.998366	0.010038	0.994981	0.00501898
XLOC_005148	1.13121	1.21194	0.701002	0.639938	0.0100484	0.00502419	0.994976
XLOC_000103	1.01284	0.778769	2.27527	2.45844	0.0100521	0.994974	0.00502606
XLOC_000551	0.509037	0.482757	1.39525	1.59572	0.010074	0.994963	0.00503701
XLOC_003114	1.81642	1.96556	0.826093	0.962283	0.010108	0.00505401	0.994946
XLOC_004648	2.15149	2.17086	0.875237	0.584922	0.0101766	0.00508832	0.994912
XLOC_000070	0.519701	0.459403	1.13209	1.02796	0.0102225	0.994889	0.00511125
XLOC_003441	1.57419	1.70714	0.991759	0.985028	0.0102516	0.00512581	0.994874
XLOC_005638	0.611613	0.665091	1.18117	1.29143	0.0103381	0.994831	0.00516903
XLOC_001753	1.85182	2.08748	0.768367	0.661863	0.0104569	0.00522847	0.994772
XLOC_001786	1.96411	2.01084	0.756235	0.476541	0.0105253	0.00526263	0.994737
XLOC_000315	1.40623	1.63668	0.388922	0.315354	0.0105315	0.00526577	0.994734
XLOC_000882	3.65735	3.47636	1.07805	0.536289	0.010541	0.00527049	0.99473
XLOC_003962	2.35187	2.62701	1.07589	1.15008	0.0105459	0.00527294	0.994727
XLOC_004938	0.452845	0.256388	1.3557	1.44772	0.0105618	0.994719	0.0052809
XLOC_004502	5.93027	5.9832	0.395007	1.43797	0.0105624	0.0052812	0.994719
XLOC_004857	1.71561	1.86604	0.641968	0.429874	0.010564	0.00528199	0.994718
XLOC_000091	0.453942	0.328395	1.61074	1.41416	0.010646	0.994677	0.00532299
XLOC_005836	1.30732	1.43	0.52974	0.385246	0.0106467	0.00532335	0.994677
XLOC_001437	0.203689	0.241982	1.28751	1.09017	0.0106541	0.994673	0.00532707
XLOC_005425	2.37379	2.46117	0.818112	0.458132	0.0106622	0.00533109	0.994669
XLOC_002641	7.17963	6.1701	1.25617	0.616122	0.0106731	0.00533655	0.994663
XLOC_000596	0.238607	0.152499	0.966079	0.845645	0.0106871	0.994656	0.00534356
XLOC_001675	10.7206	12.7922	0.544464	1.41719	0.0107052	0.00535261	0.994647
XLOC_000630	0.439921	0.33935	1.16888	1.31563	0.01071	0.994645	0.005355
XLOC_005732	4.99594	5.03617	1.07391	0.155966	0.0107214	0.0053607	0.994639
XLOC_001440	0.248036	0.35934	1.02426	1.14337	0.0107415	0.994629	0.00537073
XLOC_004147	0.471126	0.426681	1.26358	1.44793	0.0107552	0.994622	0.00537762
XLOC_000208	1.09131	1.00564	0.629559	0.599308	0.0107787	0.00538933	0.994611
XLOC_003287	3.62441	4.06177	1.11268	1.42722	0.010781	0.0053905	0.994609
XLOC_000612	1.48676	1.6441	0.81482	0.813756	0.0107931	0.00539654	0.994603
XLOC_005133	2.13198	2.18022	1.2361	1.02687	0.0108016	0.00540079	0.994599
XLOC_000676	1.96144	2.17262	0.737559	0.522031	0.0108405	0.00542025	0.99458
XLOC_002234	0.702167	0.688809	1.13144	1.04921	0.0109487	0.994526	0.00547436
XLOC_002837	0.981387	1.01584	0.596461	0.508853	0.0109575	0.00547877	0.994521
XLOC_000343	2.49638	2.63121	1.45015	1.22972	0.0109609	0.00548047	0.99452
XLOC_000246	3.77715	3.72068	1.37581	0.818719	0.0109653	0.00548263	0.994517
XLOC_001509	0.320865	0.255118	1.05274	1.21937	0.0109703	0.994515	0.00548513
XLOC_001899	3.18458	2.78506	1.05686	0.922232	0.0109782	0.00548908	0.994511
XLOC_000036	1.30759	1.42012	0.495387	0.328673	0.0109807	0.00549034	0.99451
XLOC_005209	0.175677	0.296637	1.54308	1.32011	0.0110704	0.994465	0.0055352
XLOC_006040	0.500835	0.441847	1.29422	1.47937	0.0110772	0.994461	0.00553858
XLOC_005434	2.20559	1.91815	0.444931	0.601438	0.0111225	0.00556127	0.994439
XLOC_001734	0.276257	0.233713	1.2571	1.06861	0.011137	0.994432	0.00556849
XLOC_002792	0.294554	0.275278	0.956001	0.828192	0.01114	0.99443	0.00557002
XLOC_004922	0.387593	0.301676	0.773534	0.816107	0.011152	0.994424	0.00557601
XLOC_002377	0.245443	0.386396	1.28612	1.46295	0.011216	0.994392	0.00560799
XLOC_005427	2.72823	2.34731	0.1867	0.466291	0.0112238	0.00561191	0.994388
XLOC_000019	0.692765	0.750177	0.407012	0.435665	0.0112341	0.00561704	0.994383
XLOC_004790	0.299763	0.394455	0.794098	0.822091	0.0112766	0.994362	0.0056383
XLOC_005323	17.7587	14.5836	0.591485	1.32473	0.011277	0.00563851	0.994361
XLOC_005723	2.24642	2.09234	0.775461	1.00247	0.0112847	0.00564237	0.994358
XLOC_002699	0.1473	0.191024	1.51744	1.25982	0.0112852	0.994357	0.00564262
XLOC_001861	2.17736	2.50487	0.525691	0.699585	0.0113108	0.00565538	0.994345
XLOC_002632	0.680701	0.557804	1.27526	1.21954	0.0113408	0.99433	0.00567039
XLOC_004374	1.78202	2.06252	0.601995	0.626582	0.0113884	0.00569421	0.994306
XLOC_003097	1.90198	2.21742	0.588423	0.603679	0.0114401	0.00572004	0.99428
XLOC_000609	0.492542	0.358611	2.12125	1.81571	0.0114863	0.994257	0.00574313
XLOC_000893	0.243139	0.174898	0.706636	0.803145	0.0115192	0.99424	0.00575958
XLOC_005917	5.41207	5.91677	1.02563	1.79635	0.0115259	0.00576293	0.994237
XLOC_004193	0.142494	0.116836	1.53428	1.26073	0.0115374	0.994231	0.00576871
XLOC_000412	1.09193	1.2608	2.48587	2.7486	0.0115433	0.994228	0.00577165
XLOC_003965	3.08486	3.61149	0.923054	0.816599	0.0115463	0.00577314	0.994227
XLOC_003782	6.59613	7.03605	0.853181	1.94301	0.0115599	0.00577995	0.99422
XLOC_000345	0.286997	0.14706	1.04609	0.949909	0.0116127	0.994194	0.00580637
XLOC_002105	2.69407	3.15949	0.635525	0.768479	0.0116278	0.0058139	0.994186
XLOC_000684	0.465271	0.484807	0.671618	0.714907	0.0116353	0.994182	0.00581763
XLOC_001220	0.785789	0.754567	1.91465	1.69163	0.0116739	0.994163	0.00583693
XLOC_002876	1.25902	1.46761	0.382398	0.412193	0.0116864	0.00584318	0.994157
XLOC_003065	3.87121	4.39788	1.54905	1.27346	0.0117019	0.00585095	0.994149
XLOC_005548	3.43681	3.91774	1.07867	0.705177	0.0117386	0.00586928	0.994131
XLOC_001668	0.60856	0.276261	1.99176	1.95308	0.0117423	0.994129	0.00587117
XLOC_004947	3.9541	3.97556	1.20447	0.527179	0.011743	0.00587152	0.994128
XLOC_004511	0.478866	0.476039	2.59912	2.18079	0.0117516	0.994124	0.00587582
XLOC_000021	0.512272	0.558577	2.2607	2.68293	0.0118168	0.994092	0.00590839
XLOC_005428	1.02539	0.976345	0.38115	0.237311	0.0118557	0.00592783	0.994072
XLOC_000822	0.564508	0.470594	1.42808	1.63018	0.0119172	0.994041	0.00595859
XLOC_000381	3.37366	2.87401	0.730716	0.854748	0.0119744	0.00598721	0.994013
XLOC_000282	1.41484	1.59868	0.515587	0.368669	0.0119958	0.00599791	0.994002
XLOC_003913	2.55674	2.95276	0.884696	0.968463	0.0120355	0.00601775	0.993982
XLOC_005686	2.44407	2.63587	1.22465	0.968826	0.0120493	0.00602463	0.993975
XLOC_004021	0.238853	0.0647624	0.948097	1.00537	0.0121155	0.993942	0.00605776
XLOC_001092	0.574251	0.606461	1.28148	1.14661	0.012133	0.993933	0.0060665
XLOC_001013	0.52407	0.4514	1.25389	1.11681	0.0121411	0.993929	0.00607054
XLOC_000297	0.37542	0.370723	1.14125	0.987188	0.0122062	0.993897	0.00610309
XLOC_005433	2.21265	2.01791	0.513643	0.777585	0.012225	0.00611249	0.993888
XLOC_001911	1.71605	1.80334	0.476799	0.720894	0.0122385	0.00611927	0.993881
XLOC_003249	2.9712	2.62956	0.786517	0.436363	0.012258	0.00612902	0.993871
XLOC_002559	1.95895	1.71815	0.554108	0.683323	0.0123156	0.00615782	0.993842
XLOC_006296	2.11835	2.2429	0.547258	0.854624	0.0123269	0.00616344	0.993837
XLOC_000379	1.06807	1.02169	0.829921	0.809869	0.0123778	0.00618888	0.993811
XLOC_005242	0.701262	0.70424	1.55086	1.3793	0.0124299	0.993785	0.00621497
XLOC_002722	0.440344	0.336762	0.971573	1.06929	0.0124599	0.99377	0.00622993
XLOC_000367	0.256098	0.15935	2.65585	2.16825	0.0124769	0.993762	0.00623844
XLOC_005915	0.917558	0.840017	0.510593	0.469696	0.0124823	0.00624115	0.993759
XLOC_000461	0.936265	0.793827	1.61983	1.54339	0.0124859	0.993757	0.00624296
XLOC_003858	1.45605	1.36416	0.893533	0.953647	0.0124959	0.00624796	0.993752
XLOC_004086	4.36446	3.59257	0.199139	0.482464	0.012533	0.00626652	0.993733
XLOC_001475	3.02809	3.41536	1.48539	1.35815	0.0125811	0.00629057	0.993709
XLOC_004858	1.27083	1.41199	0.615921	0.683895	0.012592	0.00629601	0.993704
XLOC_001762	5.24044	6.16228	1.42815	0.998682	0.012595	0.0062975	0.993702
XLOC_000127	1.99184	2.19045	1.13698	1.20238	0.0126295	0.00631473	0.993685
XLOC_003470	0.140587	0.147569	1.2127	1.48614	0.0126314	0.993684	0.00631569
XLOC_001880	1.35691	1.51904	0.686555	0.724015	0.0126504	0.00632522	0.993675
XLOC_000354	4.14791	4.87029	1.34099	1.32272	0.0126858	0.00634291	0.993657
XLOC_005082	0.50707	0.368574	1.69657	1.47487	0.0127176	0.993641	0.00635881
XLOC_005393	2.19837	2.49818	0.830235	0.968882	0.0127486	0.00637429	0.993626
XLOC_003165	5.81806	6.94574	0.995275	0.343238	0.0127507	0.00637533	0.993625
XLOC_000577	2.02092	2.26089	0.821498	0.972835	0.0127594	0.00637972	0.99362
XLOC_002519	3.04243	3.61252	0.839307	0.730035	0.0127786	0.0063893	0.993611
XLOC_001129	1.60072	1.89296	0.459944	0.473294	0.0128039	0.00640196	0.993598
XLOC_002306	0.655472	0.729032	1.55037	1.38861	0.0128175	0.993591	0.00640876
XLOC_006085	0.447993	0.396235	1.12752	0.991248	0.0128297	0.993585	0.00641485
XLOC_000695	1.17437	1.04099	0.23776	0.36521	0.0128395	0.00641977	0.99358
XLOC_002251	1.54522	1.65803	0.457084	0.186322	0.0128771	0.00643853	0.993561
XLOC_005872	2.50027	2.89033	0.904905	0.712544	0.0130269	0.00651345	0.993487
XLOC_001307	1.48616	1.67706	0.398717	0.565631	0.0130393	0.00651966	0.99348
XLOC_003806	6.96162	5.75739	1.12132	1.18036	0.0131321	0.00656603	0.993434
XLOC_001317	0.513301	0.477428	1.00554	0.905206	0.0131497	0.993425	0.00657485
XLOC_000230	0.341451	0.515579	1.5422	1.76703	0.0131831	0.993408	0.00659155
XLOC_000222	1.17681	0.966227	2.19847	2.38816	0.0131869	0.993407	0.00659344
XLOC_001329	3.69149	4.28002	0.627426	1.06049	0.0132541	0.00662705	0.993373
XLOC_001021	0.333643	0.305861	1.21039	1.02658	0.0132723	0.993364	0.00663615
XLOC_002803	0.204459	0.177656	0.829827	0.995702	0.0132816	0.993359	0.0066408
XLOC_004991	7.08591	8.6911	0.944424	1.02652	0.0132839	0.00664194	0.993358
XLOC_000525	0.175384	0.197612	0.849145	0.712283	0.0133404	0.99333	0.00667018
XLOC_000429	8.78899	10.5115	2.09234	2.319	0.0133439	0.00667195	0.993328
XLOC_004591	3.41719	3.99387	1.24249	1.12208	0.0133554	0.00667772	0.993322
XLOC_003648	1.33676	1.53748	0.530375	0.577752	0.0133641	0.00668204	0.993318
XLOC_001535	2.93182	3.15534	1.38874	1.02173	0.013386	0.00669299	0.993307
XLOC_005426	3.12481	2.5764	0.16798	0.408731	0.013386	0.00669301	0.993307
XLOC_005948	0.480197	0.434911	0.829404	0.915338	0.0134331	0.993283	0.00671653
XLOC_005679	0.285938	0.412595	1.02516	1.1416	0.0134543	0.993273	0.00672713
XLOC_000939	5.16044	6.29599	0.866257	0.915375	0.0135226	0.00676131	0.993239
XLOC_002640	0.343735	0.312305	1.78021	2.16565	0.0135376	0.993231	0.00676879
XLOC_005829	2.13669	2.3514	1.11108	0.917121	0.0135552	0.00677759	0.993222
XLOC_003968	3.35609	3.61925	1.16625	1.5875	0.0135619	0.00678095	0.993219
XLOC_003621	3.25188	3.83883	0.871824	0.556302	0.0135676	0.00678379	0.993216
XLOC_002548	0.236544	0.226449	0.986038	1.18745	0.0136171	0.993191	0.00680856
XLOC_001597	1.67019	1.89766	0.700859	0.791633	0.0136418	0.0068209	0.993179
XLOC_001915	2.24242	2.67106	0.647597	0.560691	0.013649	0.00682452	0.993175
XLOC_002651	7.18464	8.69494	0.634557	1.29245	0.0136556	0.00682778	0.993172
XLOC_002774	0.163889	0.268839	1.78636	2.19357	0.0137645	0.993118	0.00688227
XLOC_005926	0.191546	0.13162	1.23398	1.01375	0.0137746	0.993113	0.00688728
XLOC_004923	2.86317	3.31566	1.19618	1.11333	0.0138412	0.00692059	0.993079
XLOC_002483	0.393603	0.377423	1.01876	1.18895	0.0138656	0.993067	0.00693279
XLOC_000454	0.469428	0.496795	1.82531	1.54103	0.0138658	0.993067	0.00693288
XLOC_005901	0.512325	0.555013	1.02261	0.926634	0.0138907	0.993055	0.00694534
XLOC_006375	0.205723	0.146008	1.2052	1.47619	0.0138931	0.993053	0.00694657
XLOC_001363	1.4877	1.63705	0.680019	0.806205	0.0139409	0.00697047	0.99303
XLOC_004716	4.39997	5.33647	0.931076	0.67653	0.0139556	0.00697778	0.993022
XLOC_001444	0.203429	0.177946	1.25595	1.54372	0.0139723	0.993014	0.00698617
XLOC_000969	1.90312	1.81502	0.598016	0.854119	0.0139861	0.00699305	0.993007
XLOC_000255	2.98532	3.46047	1.21762	1.24837	0.0140139	0.00700697	0.992993
XLOC_001123	2.20863	2.51945	1.07135	1.05852	0.0140345	0.00701725	0.992983
XLOC_001199	0.148457	0.0811357	1.04277	0.853784	0.0141763	0.992912	0.00708813
XLOC_002413	3.55788	4.17078	1.16005	0.845761	0.0141783	0.00708915	0.992911
XLOC_002228	2.16765	2.43179	0.544226	0.830071	0.0142521	0.00712603	0.992874
XLOC_002965	0.245919	0.255011	1.15089	0.957126	0.0142577	0.992871	0.00712885
XLOC_003377	0.528435	0.562	2.19254	1.83851	0.0143115	0.992844	0.00715575
XLOC_006053	6.72493	8.01278	0.667239	1.48168	0.0143368	0.00716842	0.992832
XLOC_002040	5.25141	6.4025	0.975797	1.11986	0.0144126	0.0072063	0.992794
XLOC_002572	0.511511	0.619761	1.12255	1.05582	0.0144309	0.992785	0.00721544
XLOC_005860	1.09093	1.22489	0.453209	0.541922	0.01448	0.00724002	0.99276
XLOC_003322	0.494609	0.457878	1.13725	1.31616	0.0144866	0.992757	0.00724328
XLOC_000266	0.545233	0.482553	1.50317	1.76903	0.0144904	0.992755	0.00724518
XLOC_003978	0.388445	0.341334	0.943231	1.09546	0.0144996	0.99275	0.00724981
XLOC_003107	17.8623	14.4912	2.35473	1.55807	0.014512	0.00725601	0.992744
XLOC_002471	1.97979	2.18765	0.624085	0.286116	0.0145161	0.00725807	0.992742
XLOC_003331	2.16439	2.40026	1.04975	0.821642	0.0145208	0.0072604	0.99274
XLOC_000966	0.16942	0.0953619	0.585888	0.683946	0.0146215	0.992689	0.00731073
XLOC_000189	0.718175	0.52854	2.16532	1.87852	0.0147751	0.992612	0.00738757
XLOC_002800	2.84763	3.45288	0.686048	0.694299	0.0148002	0.00740011	0.9926
XLOC_000528	1.96382	1.73959	0.831355	0.681548	0.0148198	0.00740992	0.99259
XLOC_003565	0.499267	0.620971	1.0677	1.11595	0.0148204	0.99259	0.00741021
XLOC_002394	1.6818	1.56813	1.00209	0.877207	0.0148413	0.00742066	0.992579
XLOC_002997	0.600209	0.588186	1.22245	1.39871	0.0148659	0.992567	0.00743295
XLOC_003791	0.830634	0.89998	0.583921	0.584312	0.0148675	0.00743373	0.992566
XLOC_001972	0.564022	0.392229	1.19807	1.16951	0.0148871	0.992556	0.00744355
XLOC_000241	1.22567	1.32186	0.811616	0.861028	0.0149368	0.00746842	0.992532
XLOC_001078	2.8259	3.06853	1.1049	0.651927	0.0150763	0.00753813	0.992462
XLOC_005468	2.83711	3.49023	0.448056	0.553533	0.0150829	0.00754145	0.992459
XLOC_004215	0.355816	0.436808	0.727742	0.757117	0.0151388	0.992431	0.00756938
XLOC_006317	0.104777	0.0933066	2.07564	1.63819	0.0151416	0.992429	0.0075708
XLOC_005188	3.45638	4.23717	0.612937	0.733461	0.0151421	0.00757105	0.992429
XLOC_006473	2.40187	2.7255	0.872561	0.542314	0.0151604	0.00758021	0.99242
XLOC_002626	3.37298	3.31735	1.45315	0.917859	0.0151722	0.0075861	0.992414
XLOC_000300	0.396266	0.284547	0.800176	0.784727	0.0152076	0.992396	0.00760379
XLOC_002179	1.77654	1.96218	0.620201	0.324021	0.0152883	0.00764413	0.992356
XLOC_005263	0.692879	0.773797	1.35945	1.51612	0.0153057	0.992347	0.00765286
XLOC_001587	2.66234	3.11122	0.657607	0.928514	0.0153176	0.00765878	0.992341
XLOC_004725	2.98795	3.60298	0.751379	0.856719	0.0153226	0.00766132	0.992339
XLOC_002930	1.29185	1.40319	0.58719	0.720615	0.0153333	0.00766664	0.992333
XLOC_000767	2.52645	2.35164	1.42322	1.20158	0.0153346	0.0076673	0.992333
XLOC_000018	0.933353	0.865336	1.64088	1.84136	0.0154465	0.992277	0.00772327
XLOC_004259	1.0763	1.1622	0.665475	0.728266	0.0154956	0.00774782	0.992252
XLOC_005827	2.60775	3.02853	1.12822	0.978134	0.0156422	0.00782111	0.992179
XLOC_003553	3.04289	3.35417	0.929748	0.361705	0.0157172	0.00785862	0.992141
XLOC_000940	0.41682	0.360209	0.918238	1.05994	0.0157586	0.992121	0.0078793
XLOC_004233	0.355565	0.32819	0.68959	0.786592	0.0157955	0.992102	0.00789776
XLOC_001718	0.690604	0.45408	1.94808	1.72854	0.0158598	0.99207	0.0079299
XLOC_000232	0.247076	0.45028	1.91189	2.31326	0.0158762	0.992062	0.00793808
XLOC_000970	1.23472	1.30613	0.803923	0.885821	0.0159109	0.00795544	0.992045
XLOC_001259	0.249274	0.243147	0.995272	1.2145	0.0159201	0.99204	0.00796007
XLOC_001712	2.69883	3.10105	0.745528	1.05944	0.0159231	0.00796155	0.992038
XLOC_000945	0.329088	0.411428	1.14799	1.35799	0.0159354	0.992032	0.00796768
XLOC_002739	3.52309	4.31858	0.465417	0.757759	0.0160048	0.0080024	0.991998
XLOC_005913	0.564461	0.471672	0.882012	0.909625	0.0160264	0.991987	0.00801318
XLOC_005457	1.17413	1.07821	0.453893	0.285357	0.0160314	0.00801569	0.991984
XLOC_002935	0.335237	0.315291	0.944081	0.804722	0.0160366	0.991982	0.00801832
XLOC_003095	0.297531	0.198595	1.01737	1.21719	0.0160554	0.991972	0.00802768
XLOC_000178	0.232369	0.266273	0.67163	0.580909	0.0161056	0.991947	0.00805278
XLOC_005194	2.2778	2.56545	1.13466	0.921293	0.0161117	0.00805587	0.991944
XLOC_006449	2.88376	3.21387	0.894767	1.27656	0.0161257	0.00806285	0.991937
XLOC_006133	0.217541	0.166742	0.903078	0.748149	0.016161	0.991919	0.00808051
XLOC_004676	1.4854	1.61008	1.0616	1.06542	0.0161899	0.00809495	0.991905
XLOC_000296	0.178843	0.235368	0.59922	0.698419	0.0162956	0.991852	0.00814779
XLOC_006350	0.431017	0.389937	1.49295	1.81191	0.0163525	0.991824	0.00817624
XLOC_005115	4.19875	4.52348	1.41672	0.61336	0.0163553	0.00817764	0.991822
XLOC_004125	0.664168	0.673924	1.05406	0.966222	0.0163731	0.991813	0.00818656
XLOC_005307	0.164469	0.0820352	1.72241	2.19017	0.0163741	0.991813	0.00818703
XLOC_001540	3.07668	3.17546	0.73236	1.27403	0.0164053	0.00820263	0.991797
XLOC_003428	2.44429	2.66502	0.421017	0.865326	0.0164272	0.00821359	0.991786
XLOC_004039	4.77748	3.80532	0.564165	0.526139	0.0164462	0.00822312	0.991777
XLOC_004439	2.08588	2.01086	0.933066	0.609143	0.0165227	0.00826136	0.991739
XLOC_001461	0.332266	0.343115	0.674749	0.775094	0.0165631	0.991718	0.00828157
XLOC_000284	0.516566	0.658584	1.12773	1.13971	0.0166024	0.991699	0.00830118
XLOC_003495	0.542194	0.538284	0.590877	0.605511	0.0166516	0.991674	0.0083258
XLOC_005212	7.7631	9.85979	0.596132	0.860062	0.0166607	0.00833037	0.99167
XLOC_005583	0.655474	0.531726	1.56256	1.8218	0.0166682	0.991666	0.00833411
XLOC_004163	5.29111	4.29913	0.963951	1.02493	0.0166685	0.00833425	0.991666
XLOC_002511	1.76742	1.85513	1.02523	1.18749	0.0166906	0.00834531	0.991655
XLOC_003800	2.61334	3.10838	0.917799	0.714892	0.0166918	0.00834588	0.991654
XLOC_002245	4.82132	5.10056	1.34475	0.297767	0.0167011	0.00835056	0.991649
XLOC_000475	1.50279	1.47866	1.33934	1.36632	0.0167953	0.00839765	0.991602
XLOC_005556	0.643907	0.636393	1.48214	1.28649	0.0168688	0.991566	0.00843439
XLOC_003275	0.826233	0.750626	0.286464	0.379481	0.0168791	0.00843954	0.99156
XLOC_002718	1.49449	1.49779	0.935305	0.76477	0.0169807	0.00849035	0.99151
XLOC_000542	0.307152	0.234396	2.02766	1.62362	0.0169857	0.991507	0.00849283
XLOC_002538	8.79623	7.17648	0.792776	1.57306	0.0170144	0.0085072	0.991493
XLOC_000565	1.68855	1.60141	5.31881	4.46456	0.0170417	0.991479	0.00852087
XLOC_005348	2.20256	2.10687	0.542303	0.908433	0.0170763	0.00853813	0.991462
XLOC_005361	0.174739	0.184543	1.03564	1.29722	0.0171413	0.991429	0.00857065
XLOC_001173	0.5583	0.352949	1.33315	1.24943	0.0171534	0.991423	0.00857672
XLOC_000292	0.815705	0.868485	1.53901	1.3834	0.0171597	0.99142	0.00857987
XLOC_004427	0.350879	0.593316	1.65282	1.48957	0.0172237	0.991388	0.00861183
XLOC_006519	2.43106	2.81156	0.959476	0.664945	0.0172299	0.00861495	0.991385
XLOC_000828	0.685489	0.639509	0.844316	0.834349	0.0172397	0.99138	0.00861986
XLOC_005386	2.9591	3.58484	0.920207	0.749251	0.0172518	0.0086259	0.991374
XLOC_004001	1.97727	2.10168	0.833199	0.487893	0.0172551	0.00862757	0.991372
XLOC_006326	0.230331	0.232724	1.28918	1.04033	0.0173181	0.991341	0.00865906
XLOC_004970	3.9033	4.75595	1.08366	1.15878	0.0173322	0.0086661	0.991334
XLOC_004160	1.0034	1.08044	0.585299	0.471703	0.0174017	0.00870085	0.991299
XLOC_003678	7.3633	6.05839	0.79045	1.50457	0.0174077	0.00870387	0.991296
XLOC_000217	0.307393	0.310343	0.941018	0.791947	0.017409	0.991296	0.00870449
XLOC_001512	2.49755	2.74154	0.890534	1.22939	0.0174528	0.00872642	0.991274
XLOC_001470	1.48968	1.63026	1.03905	1.02773	0.0174647	0.00873237	0.991268
XLOC_003650	2.48507	3.0602	0.628448	0.477549	0.0174712	0.00873562	0.991264
XLOC_004503	1.41648	1.5607	0.822842	0.907248	0.0174853	0.00874263	0.991257
XLOC_003728	2.36336	2.36767	1.34463	1.0284	0.0175168	0.0087584	0.991242
XLOC_001035	1.68661	1.6763	1.05094	0.855693	0.0175534	0.00877669	0.991223
XLOC_005295	2.30021	2.69556	1.04265	1.00219	0.0176583	0.00882913	0.991171
XLOC_005976	0.33167	0.201782	1.51664	1.24553	0.017712	0.991144	0.00885599
XLOC_005365	0.486723	0.484821	1.59812	1.9454	0.0177477	0.991126	0.00887384
XLOC_005320	0.641182	0.744873	2.40974	2.01302	0.0177496	0.991125	0.00887482
XLOC_003668	0.723434	0.717349	1.14655	1.04524	0.0177788	0.991111	0.00888941
XLOC_003457	2.33163	2.17278	0.719339	1.05276	0.0177846	0.00889229	0.991108
XLOC_000397	0.698882	0.738698	1.35774	1.55289	0.0177957	0.991102	0.00889785
XLOC_001304	2.68204	3.04494	0.363873	0.855263	0.0178728	0.00893639	0.991064
XLOC_002733	1.37405	1.5394	0.695198	0.538418	0.0179062	0.00895312	0.991047
XLOC_000471	1.13731	1.22969	2.09379	1.89406	0.0179385	0.991031	0.00896926
XLOC_003078	1.66303	1.44414	0.755695	0.722727	0.0179751	0.00898757	0.991012
XLOC_005951	0.330031	0.222956	1.30291	1.60499	0.0180231	0.990988	0.00901153
XLOC_000478	0.97005	0.750869	1.75865	1.90707	0.0180259	0.990987	0.00901294
XLOC_003014	1.93206	1.75796	0.594379	0.247126	0.0180939	0.00904695	0.990953
XLOC_002947	0.315549	0.325346	1.28469	1.58919	0.0181105	0.990945	0.00905524
XLOC_000731	0.37958	0.294644	1.20477	1.01218	0.0181109	0.990945	0.00905546
XLOC_000210	0.385849	0.393185	0.72486	0.644634	0.018111	0.990945	0.00905548
XLOC_005941	2.69981	2.24059	0.793375	0.780278	0.0181152	0.00905762	0.990942
XLOC_000148	2.3011	2.7008	0.847287	1.00532	0.0181216	0.00906082	0.990939
XLOC_001634	1.94599	1.8443	0.764592	1.01921	0.0181647	0.00908236	0.990918
XLOC_002650	1.91972	1.80905	0.444305	0.769912	0.0181954	0.00909769	0.990902
XLOC_005011	1.75364	2.0238	0.911018	0.876495	0.0182219	0.00911093	0.990889
XLOC_005554	3.66614	4.47755	0.864458	1.10407	0.0182588	0.00912942	0.990871
XLOC_004930	3.39603	4.08402	1.05003	1.23339	0.0182599	0.00912995	0.99087
XLOC_000535	0.450968	0.418119	1.23158	1.48221	0.0182629	0.990869	0.00913143
XLOC_006069	2.56911	2.99734	0.601006	0.947495	0.0182816	0.00914082	0.990859
XLOC_006196	2.57069	2.78405	0.996137	0.512795	0.0183556	0.00917779	0.990822
XLOC_002066	2.10922	2.37068	1.00795	0.738004	0.0183766	0.00918832	0.990812
XLOC_004959	0.327962	0.229152	1.0734	1.3032	0.0183814	0.990809	0.00919072
XLOC_000402	0.852427	0.895955	0.639432	0.679418	0.0184139	0.00920697	0.990793
XLOC_001885	0.939881	0.879543	1.51977	1.70327	0.0184176	0.990791	0.00920882
XLOC_005004	0.283928	0.148	0.78147	0.882938	0.0184197	0.99079	0.00920986
XLOC_001951	1.36988	1.44886	0.754573	0.563332	0.0184803	0.00924013	0.99076
XLOC_002071	3.4471	4.32659	0.535722	0.723089	0.018524	0.00926198	0.990738
XLOC_003435	2.07521	2.47905	0.819149	0.714851	0.0185419	0.00927095	0.990729
XLOC_005477	1.21261	1.10865	0.708234	0.762946	0.0185672	0.00928361	0.990716
XLOC_004541	1.60256	1.77536	0.402244	0.670766	0.0186574	0.00932871	0.990671
XLOC_001607	1.4194	1.58542	0.818411	0.695438	0.018666	0.009333	0.990667
XLOC_003682	4.12231	3.35407	0.944948	0.68656	0.018693	0.0093465	0.990654
XLOC_005032	2.64045	3.07631	0.837244	1.12287	0.0187046	0.0093523	0.990648
XLOC_004598	5.23502	6.28949	0.873045	1.56929	0.0188122	0.00940612	0.990594
XLOC_005124	0.478684	0.309724	1.18319	1.35969	0.0188476	0.990576	0.00942382
XLOC_002747	4.37461	4.23022	0.382519	1.33183	0.018872	0.009436	0.990564
XLOC_004267	0.264303	0.330908	0.974115	1.18109	0.0188779	0.990561	0.00943895
XLOC_004413	2.63858	3.14348	1.08294	0.944352	0.0188948	0.0094474	0.990553
XLOC_003859	0.821793	0.841702	0.598883	0.652776	0.018911	0.00945552	0.990544
XLOC_000487	0.356211	0.207782	1.7409	1.41145	0.0189365	0.990532	0.00946823
XLOC_000859	2.98653	3.25318	1.59774	1.19683	0.0189777	0.00948887	0.990511
XLOC_000776	5.48781	6.94662	0.976108	0.515727	0.0189879	0.00949397	0.990506
XLOC_000835	2.74036	2.70801	0.429361	0.992316	0.0190516	0.00952582	0.990474
XLOC_003683	3.96846	4.26353	1.40663	0.582235	0.0191088	0.00955438	0.990446
XLOC_004818	0.234591	0.286237	1.35523	1.08999	0.0191534	0.990423	0.00957672
XLOC_002936	0.47222	0.333635	1.04468	1.18982	0.0191655	0.990417	0.00958273
XLOC_000746	0.251507	0.184421	1.22741	1.54948	0.0191834	0.990408	0.00959169
XLOC_004738	1.78146	1.70022	1.0636	0.859937	0.0192344	0.00961719	0.990383
XLOC_000235	0.733471	0.776944	0.919903	0.944121	0.0192351	0.990382	0.00961754
XLOC_002075	2.72595	3.15404	0.98738	0.551237	0.0192455	0.00962275	0.990377
XLOC_000844	3.30684	4.12033	0.769354	0.854713	0.0192941	0.00964706	0.990353
XLOC_002825	0.349485	0.279843	0.989582	1.19831	0.0193553	0.990322	0.00967766
XLOC_002829	1.42721	1.61637	0.771257	0.639173	0.0193782	0.0096891	0.990311
XLOC_003775	5.02234	6.41884	0.792634	0.775511	0.0194288	0.00971439	0.990286
XLOC_001617	0.572571	0.688615	1.47844	1.72798	0.019433	0.990284	0.00971649
XLOC_005221	5.25283	5.37173	1.54758	0.31094	0.0194998	0.00974989	0.99025
XLOC_005026	0.168252	0.307662	1.28577	1.06025	0.0195139	0.990243	0.00975694
XLOC_004428	3.19855	3.19706	1.68194	1.18089	0.0195286	0.00976432	0.990236
XLOC_004385	2.36942	2.70584	1.21251	1.33754	0.0196084	0.0098042	0.990196
XLOC_000219	0.689788	0.473474	1.63916	1.46729	0.0196217	0.990189	0.00981087
XLOC_004213	3.15389	3.41855	0.837211	1.39555	0.019676	0.00983799	0.990162
XLOC_000796	0.303047	0.223887	2.12763	1.6686	0.019702	0.990149	0.00985102
XLOC_004283	0.315612	0.151346	1.22962	1.03339	0.0197035	0.990148	0.00985177
XLOC_002992	4.36454	4.2001	1.87456	1.0944	0.0197041	0.00985206	0.990148
XLOC_001930	3.41333	3.24109	0.772637	1.38943	0.0197216	0.00986079	0.990139
XLOC_005672	0.755147	0.703089	0.407596	0.471679	0.0197366	0.00986831	0.990132
XLOC_002176	1.94844	1.9344	0.721095	1.02582	0.0197934	0.00989668	0.990103
XLOC_005509	2.54818	3.17674	0.60411	0.684321	0.0197965	0.00989827	0.990102
XLOC_005479	3.43827	4.12599	0.919005	1.26282	0.0198019	0.00990095	0.990099
XLOC_005257	0.282807	0.349983	1.06398	0.887815	0.0198255	0.990087	0.00991275
XLOC_000414	1.57214	1.42573	0.769337	0.585691	0.0198328	0.00991641	0.990084
XLOC_003087	0.450255	0.407092	1.84916	1.49606	0.0198383	0.990081	0.00991913
XLOC_004885	0.521087	0.406114	1.2405	1.46777	0.0198425	0.990079	0.00992127
XLOC_003699	0.421787	0.578443	1.10955	1.21694	0.0198979	0.990051	0.00994894
XLOC_005332	0.442766	0	1.78824	1.75475	0.0199032	0.990048	0.00995158
XLOC_002462	2.83153	3.34949	1.21106	0.953395	0.0201211	0.0100606	0.989939
XLOC_006293	3.47557	2.69998	0.431609	0.244095	0.0204072	0.0102036	0.989796
XLOC_003403	0.148245	0.35308	1.27817	1.54588	0.020418	0.989791	0.010209
XLOC_000227	2.24026	2.74351	0.769438	0.742914	0.020431	0.0102155	0.989784
XLOC_001710	0.326243	0.240002	0.881746	0.752621	0.0204861	0.989757	0.0102431
XLOC_002253	5.82535	7.19977	0.481708	1.3578	0.0205794	0.0102897	0.98971
XLOC_006501	2.05394	2.51834	0.693325	0.695688	0.0206275	0.0103137	0.989686
XLOC_002701	0.608364	0.385587	2.53407	2.05797	0.0206823	0.989659	0.0103411
XLOC_003440	3.30153	4.10866	0.70302	0.943935	0.0206999	0.01035	0.98965
XLOC_002517	1.80932	2.16143	0.739471	0.57581	0.0207179	0.0103589	0.989641
XLOC_004223	2.00676	2.07717	0.693092	1.03144	0.0207883	0.0103942	0.989606
XLOC_001212	2.70154	2.98027	1.18292	0.701304	0.0208031	0.0104015	0.989598
XLOC_000225	0.868885	0.945245	0.566164	0.484349	0.0208106	0.0104053	0.989595
XLOC_006380	0.292818	0	1.43009	1.24027	0.0208705	0.989565	0.0104352
XLOC_001320	1.84984	2.2329	0.747589	0.718185	0.0208802	0.0104401	0.98956
XLOC_003606	0.828911	0.674875	1.52786	1.73548	0.0209124	0.989544	0.0104562
XLOC_002771	3.64518	3.96822	1.61168	0.941954	0.0209208	0.0104604	0.98954
XLOC_004312	1.63031	1.88975	0.789803	0.875613	0.0210263	0.0105132	0.989487
XLOC_005640	5.51914	4.78573	1.10995	1.89733	0.0210575	0.0105287	0.989471
XLOC_003898	1.64403	1.83345	0.618228	0.846786	0.0210722	0.0105361	0.989464
XLOC_000089	0.380075	0.458325	0.943771	0.830006	0.0211035	0.989448	0.0105518
XLOC_005394	0.650708	0.871519	1.5025	1.518	0.0211371	0.989431	0.0105686
XLOC_001010	9.89383	13.0369	0.909146	0.760279	0.0212084	0.0106042	0.989396
XLOC_003021	2.16567	2.34954	1.25372	1.44937	0.0212544	0.0106272	0.989373
XLOC_004548	3.36674	4.21304	0.719129	0.947949	0.0212853	0.0106427	0.989357
XLOC_000791	0.441472	0	2.27759	1.93379	0.0213278	0.989336	0.0106639
XLOC_000271	2.04141	2.26629	1.03522	1.23775	0.0214147	0.0107074	0.989293
XLOC_003571	0.366217	0.366584	1.4662	1.18062	0.021546	0.989227	0.010773
XLOC_000181	2.02129	2.41048	0.888569	0.924446	0.021557	0.0107785	0.989222
XLOC_002215	3.31671	3.96002	1.06072	0.499898	0.0215731	0.0107866	0.989213
XLOC_004763	2.7829	3.50899	0.684	0.736475	0.0216109	0.0108054	0.989195
XLOC_004017	1.99571	1.81322	0.710231	0.97135	0.0216975	0.0108488	0.989151
XLOC_003662	0.66161	0.49775	1.75283	1.48765	0.0217076	0.989146	0.0108538
XLOC_001697	9.71299	12.7439	0.679757	1.22709	0.0217328	0.0108664	0.989134
XLOC_001047	0.421054	0.362377	2.54158	1.98351	0.02176	0.98912	0.01088
XLOC_004119	2.13762	2.0687	0.493389	0.908599	0.0217921	0.0108961	0.989104
XLOC_002661	0.575488	0.348918	1.3027	1.46084	0.0218333	0.989083	0.0109166
XLOC_002902	3.48984	4.46362	0.525065	0.77036	0.0220004	0.0110002	0.989
XLOC_006493	3.85618	4.63216	1.39401	0.862256	0.0220337	0.0110168	0.988983
XLOC_003622	1.14764	1.24941	1.54058	1.58092	0.0220791	0.98896	0.0110395
XLOC_000196	0.259432	0.217254	0.619453	0.747173	0.0220889	0.988956	0.0110444
XLOC_000581	2.14812	1.76532	0.703557	0.625594	0.0220967	0.0110484	0.988952
XLOC_004107	0.21693	0.231103	1.31762	1.70683	0.0220967	0.988952	0.0110484
XLOC_003761	2.09715	1.80379	0.796341	0.543758	0.0220968	0.0110484	0.988952
XLOC_000481	3.93525	4.59098	2.08522	1.86334	0.022113	0.0110565	0.988944
XLOC_003152	22.3177	29.8518	1.48159	0.771274	0.02222	0.01111	0.98889
XLOC_005282	3.29011	3.7417	1.26224	0.626061	0.0222418	0.0111209	0.988879
XLOC_000194	3.44886	4.41881	0.752127	0.729435	0.0223117	0.0111558	0.988844
XLOC_004953	6.61777	8.78099	0.662595	0.250624	0.0223388	0.0111694	0.988831
XLOC_004827	0.887667	0.713745	1.46147	1.38602	0.0223737	0.988813	0.0111869
XLOC_001285	4.05076	3.18104	0.79225	0.650586	0.0223948	0.0111974	0.988803
XLOC_004926	2.29784	2.46174	1.15647	0.755091	0.0223987	0.0111993	0.988801
XLOC_001186	3.66591	4.58528	1.13508	1.05605	0.0224096	0.0112048	0.988795
XLOC_003718	0.249449	0.274619	1.60186	1.24851	0.0224115	0.988794	0.0112058
XLOC_003731	0.968606	0.977589	2.16812	2.5983	0.0224936	0.988753	0.0112468
XLOC_002754	0.28821	0.324468	0.885255	1.09007	0.0225164	0.988742	0.0112582
XLOC_003408	0.44137	0.617593	1.68479	2.05423	0.0225396	0.98873	0.0112698
XLOC_002088	1.25015	1.29792	0.844529	0.698429	0.0225973	0.0112986	0.988701
XLOC_004058	0.301382	0.291677	1.22543	0.979055	0.0226209	0.98869	0.0113105
XLOC_001428	0.176101	0	0.684032	0.769012	0.0226538	0.988673	0.0113269
XLOC_001174	1.89689	1.61212	0.644824	0.786701	0.0226584	0.0113292	0.988671
XLOC_002654	2.00196	2.22078	1.16996	0.929156	0.0226796	0.0113398	0.98866
XLOC_000092	1.9707	2.03739	1.38841	1.17773	0.0226887	0.0113443	0.988656
XLOC_000849	0.704319	0.902296	1.70212	1.54639	0.0227357	0.988632	0.0113679
XLOC_002082	0.388993	0.362538	1.54433	1.23442	0.0227416	0.988629	0.0113708
XLOC_004179	0.552421	0.457683	1.70856	2.13323	0.0228054	0.988597	0.0114027
XLOC_003431	0.819483	0.857617	1.16478	1.27587	0.0228549	0.988573	0.0114275
XLOC_004074	1.39573	1.32848	1.98941	1.83403	0.0229127	0.988544	0.0114564
XLOC_004432	1.39599	1.62787	0.744036	0.767823	0.022951	0.0114755	0.988525
XLOC_004600	5.21724	6.47624	1.02587	1.62736	0.0230033	0.0115016	0.988498
XLOC_001672	2.10115	2.61272	0.674413	0.468165	0.0230338	0.0115169	0.988483
XLOC_004242	3.1323	3.99029	0.786327	0.517795	0.023052	0.011526	0.988474
XLOC_005771	0.329575	0.236147	0.807609	0.969906	0.0230588	0.988471	0.0115294
XLOC_002476	0.687605	0.599501	1.19007	1.06841	0.0230875	0.988456	0.0115437
XLOC_003783	1.59682	1.73745	1.08247	0.935193	0.0230955	0.0115477	0.988452
XLOC_005288	0.312725	0.32663	1.26002	1.6041	0.0231298	0.988435	0.0115649
XLOC_000618	1.98237	2.34221	0.900056	1.00466	0.0231512	0.0115756	0.988424
XLOC_005602	6.62077	8.6904	1.05328	0.664933	0.0231679	0.011584	0.988416
XLOC_004100	0.5827	0.412661	1.64485	1.38006	0.0232066	0.988397	0.0116033
XLOC_002579	2.4041	2.67855	1.11545	0.687316	0.0232076	0.0116038	0.988396
XLOC_004751	8.30658	6.66367	0.55873	1.66047	0.0232314	0.0116157	0.988384
XLOC_002691	0.378947	0.374405	0.980332	0.818114	0.0232733	0.988363	0.0116367
XLOC_001267	9.16268	11.9872	0.394572	1.41562	0.0232789	0.0116394	0.988361
XLOC_005214	1.18211	1.26091	1.93035	1.75433	0.0232854	0.988357	0.0116427
XLOC_000434	3.47163	4.50464	0.708743	0.584588	0.0233913	0.0116956	0.988304
XLOC_000265	0.434583	0.31605	0.946618	1.11236	0.0234077	0.988296	0.0117038
XLOC_000627	0.142985	0.0998388	0.621132	0.492545	0.0234086	0.988296	0.0117043
XLOC_002724	4.42202	3.60656	0.592185	1.13764	0.023411	0.0117055	0.988294
XLOC_000437	3.223	2.60452	0.830194	0.952219	0.0234366	0.0117183	0.988282
XLOC_005656	0.406651	0.35431	0.974148	0.821476	0.0234785	0.988261	0.0117392
XLOC_003721	4.46362	4.66579	2.15899	1.29707	0.0234961	0.0117481	0.988252
XLOC_000283	2.60602	3.26843	0.711733	0.840778	0.0235248	0.0117624	0.988238
XLOC_004678	0.332364	0.317957	0.720775	0.866376	0.0235336	0.988233	0.0117668
XLOC_005530	1.90876	2.36736	0.396101	0	0.0235342	0.0117671	0.988233
XLOC_002791	1.47519	1.60333	0.539361	0.782112	0.0235472	0.0117736	0.988226
XLOC_006001	26.5439	35.9121	0.714169	1.58988	0.0236045	0.0118022	0.988198
XLOC_004363	0.285766	0.189374	0.770985	0.938244	0.0236068	0.988197	0.0118034
XLOC_004915	1.44532	1.48238	0.579026	0.816373	0.0237071	0.0118536	0.988146
XLOC_001567	1.96095	1.69285	0.80296	0.565226	0.0237073	0.0118537	0.988146
XLOC_002086	0.690826	0.552547	1.05639	1.07965	0.0237971	0.988101	0.0118986
XLOC_005255	2.12687	2.40891	0.889838	1.16004	0.0238082	0.0119041	0.988096
XLOC_004544	2.11681	2.54071	0.994861	0.955863	0.0238513	0.0119257	0.988074
XLOC_001085	1.91072	1.80081	0.903742	0.568839	0.0238991	0.0119496	0.98805
XLOC_006494	0.310285	0.205021	1.01666	1.27663	0.0239925	0.988004	0.0119962
XLOC_005940	3.25435	3.97022	1.08111	0.567896	0.0240605	0.0120302	0.98797
XLOC_002578	11.6167	15.4247	1.02026	1.62174	0.0240678	0.0120339	0.987966
XLOC_000140	1.37555	1.27765	2.01021	2.24345	0.0240814	0.987959	0.0120407
XLOC_002004	0.566613	0.462802	1.48099	1.2352	0.0241201	0.98794	0.0120601
XLOC_002291	1.98524	1.55169	0.386649	0.224416	0.0241287	0.0120643	0.987936
XLOC_002247	8.48484	11.502	0.371096	0.533856	0.0241683	0.0120841	0.987916
XLOC_000611	1.62448	1.99448	0.590854	0.657141	0.0242252	0.0121126	0.987887
XLOC_001359	2.47523	2.46403	1.53866	1.1877	0.0242666	0.0121333	0.987867
XLOC_006075	0.578728	0.477011	2.44804	1.93064	0.0242687	0.987866	0.0121343
XLOC_003515	0.569842	0.825045	1.64648	1.52609	0.0242821	0.987859	0.012141
XLOC_006126	0.605441	0.552501	1.081	0.952493	0.0242835	0.987858	0.0121418
XLOC_001421	0.390391	0.260897	2.21966	1.71456	0.0243112	0.987844	0.0121556
XLOC_002372	0.321789	0.330996	0.748796	0.633204	0.0243665	0.987817	0.0121832
XLOC_000298	0.51409	0.537642	1.63743	2.0577	0.0244314	0.987784	0.0122157
XLOC_001454	0.367632	0.332696	1.34954	1.72636	0.0244509	0.987775	0.0122254
XLOC_004932	0.321088	0.235074	0.810221	0.687357	0.0244536	0.987773	0.0122268
XLOC_003568	1.83273	1.82311	0.536034	0.891057	0.0244649	0.0122324	0.987768
XLOC_002510	1.24764	1.29117	1.41082	1.43218	0.0244754	0.987762	0.0122377
XLOC_002405	0.355253	0.475067	1.62981	2.07198	0.0245212	0.987739	0.0122606
XLOC_000164	0.155144	0.130687	1.56768	1.176	0.0245583	0.987721	0.0122791
XLOC_005298	3.26203	4.03157	0.679948	1.10662	0.0245914	0.0122957	0.987704
XLOC_005184	8.89382	11.4589	1.56485	0	0.0246357	0.0123179	0.987682
XLOC_004796	0.660684	0.561389	0.304381	0.279744	0.024766	0.012383	0.987617
XLOC_005067	0.877085	0.718784	1.28743	1.32997	0.024794	0.987603	0.012397
XLOC_001247	0.514486	0.418729	0.843317	0.940695	0.0248125	0.987594	0.0124062
XLOC_001743	3.78235	4.88177	0.830444	0.337229	0.0248772	0.0124386	0.987561
XLOC_000971	0.53923	0.477679	1.35201	1.12539	0.024892	0.987554	0.012446
XLOC_000211	0.247325	0.260062	1.4326	1.8843	0.0249064	0.987547	0.0124532
XLOC_005047	0.27923	0.4865	1.01872	1.05163	0.0249141	0.987543	0.0124571
XLOC_001138	3.61386	4.66051	0.933279	0.753437	0.0250172	0.0125086	0.987491
XLOC_000318	0.266915	0.232045	1.60789	1.23203	0.0250288	0.987486	0.0125144
XLOC_000883	1.18498	1.04573	0.483475	0.294744	0.0250972	0.0125486	0.987451
XLOC_001553	2.12596	2.73289	0.354904	0.552836	0.0251259	0.0125629	0.987437
XLOC_001082	0.494009	0.175407	1.46096	1.3323	0.0251886	0.987406	0.0125943
XLOC_005950	0.641812	0.581383	1.21835	1.05886	0.0251968	0.987402	0.0125984
XLOC_002984	0.54059	0.354133	1.03388	1.11348	0.0252091	0.987395	0.0126045
XLOC_003429	2.66221	2.56196	0.652424	1.19125	0.0252928	0.0126464	0.987354
XLOC_004804	2.25314	2.1129	0.961487	0.513725	0.025347	0.0126735	0.987327
XLOC_004128	0.173642	0.144313	1.19975	0.910015	0.0254122	0.987294	0.0127061
XLOC_004822	3.00237	3.90081	0.722007	0.625812	0.0254495	0.0127247	0.987275
XLOC_005296	3.26145	2.96681	1.20248	0.533715	0.0254598	0.0127299	0.98727
XLOC_000355	4.20011	5.1933	1.56642	1.68472	0.0255068	0.0127534	0.987247
XLOC_000104	1.37837	1.07733	0.243301	0.314242	0.025537	0.0127685	0.987232
XLOC_000568	0.181949	0.0683675	1.28549	0.977778	0.0255387	0.987231	0.0127693
XLOC_003989	1.64937	1.84898	0.770986	0.4594	0.0256035	0.0128017	0.987198
XLOC_003549	0.549858	0.625771	0.886261	0.96655	0.0256059	0.987197	0.0128029
XLOC_000756	1.47157	1.76297	0.324681	0.571184	0.0256166	0.0128083	0.987192
XLOC_001650	0.620035	0.503302	0.958854	0.91927	0.0256478	0.987176	0.0128239
XLOC_001842	0.523361	0.541101	1.49426	1.22462	0.0256562	0.987172	0.0128281
XLOC_002625	12.4358	16.8451	1.01419	1.23866	0.02566	0.01283	0.98717
XLOC_001000	2.29169	2.77715	1.04837	0.882916	0.0256955	0.0128477	0.987152
XLOC_004050	0.539438	0.55852	1.12598	1.35082	0.0257507	0.987125	0.0128753
XLOC_005356	3.10702	3.921	0.986788	0.64353	0.0257552	0.0128776	0.987122
XLOC_006423	2.26513	2.44556	0.896017	0.360166	0.0257586	0.0128793	0.987121
XLOC_001928	2.33535	2.44907	1.31089	0.905317	0.0258609	0.0129305	0.98707
XLOC_004689	0.202139	0.202597	1.63257	1.22906	0.0259282	0.987036	0.0129641
XLOC_004808	1.40206	1.32864	0.828009	0.963781	0.0259775	0.0129887	0.987011
XLOC_004736	3.7378	4.97596	0.482858	0.642009	0.0260078	0.0130039	0.986996
XLOC_001106	2.35237	2.67208	1.47039	1.27411	0.0260235	0.0130118	0.986988
XLOC_001154	6.40274	7.50753	2.19495	0.770127	0.0260782	0.0130391	0.986961
XLOC_005908	0.169433	0.11859	1.32438	0.99375	0.0260938	0.986953	0.0130469
XLOC_001970	0.293446	0.176965	1.2458	1.62424	0.0261642	0.986918	0.0130821
XLOC_000810	4.53563	5.96157	0.953905	0.521987	0.0262087	0.0131043	0.986896
XLOC_004897	2.50856	2.08763	0.860889	0.542304	0.0262619	0.0131309	0.986869
XLOC_005584	0.387775	0.428219	0.668303	0.6045	0.0262737	0.986863	0.0131369
XLOC_000530	0.158716	0.130797	1.40674	1.9062	0.0263001	0.98685	0.01315
XLOC_000496	0.448384	0.307662	1.18399	1.46414	0.0263729	0.986814	0.0131865
XLOC_002769	0.470907	0.586988	1.23348	1.48266	0.0263976	0.986801	0.0131988
XLOC_001328	0.30589	0.230532	1.39267	1.83197	0.0264074	0.986796	0.0132037
XLOC_003649	3.00496	3.57496	0.729786	1.23945	0.0264176	0.0132088	0.986791
XLOC_005850	3.70002	4.72799	0.967996	1.16043	0.0264715	0.0132358	0.986764
XLOC_000215	0.37458	0.334682	0.665451	0.584871	0.0265241	0.986738	0.0132621
XLOC_001390	0.694863	0.681372	1.75567	1.45166	0.026526	0.986737	0.013263
XLOC_004249	3.22172	2.68148	0.620215	1.06674	0.0265388	0.0132694	0.986731
XLOC_002717	2.50405	2.98517	1.02704	1.25654	0.0265544	0.0132772	0.986723
XLOC_003706	2.61172	3.2228	0.832862	0.360303	0.0266002	0.0133001	0.9867
XLOC_004455	0.547071	0.724704	1.97506	1.62945	0.0266447	0.986678	0.0133224
XLOC_000372	1.60203	1.91708	0.824258	0.796014	0.0266447	0.0133224	0.986678
XLOC_001301	0.607294	0.574632	1.17156	1.00845	0.0266723	0.986664	0.0133362
XLOC_001318	3.24897	4.17386	0.868622	0.973587	0.0267114	0.0133557	0.986644
XLOC_006502	8.49919	11.2552	1.07905	1.72098	0.0267455	0.0133728	0.986627
XLOC_000050	7.14162	6.71682	2.29311	3.5605	0.0267697	0.0133849	0.986615
XLOC_000764	0.484138	0.428587	1.60572	1.28073	0.0267893	0.986605	0.0133946
XLOC_004442	0.805725	0.571833	1.80496	2.17093	0.0268218	0.986589	0.0134109
XLOC_002815	1.93672	2.43041	0.672582	0.72545	0.026844	0.013422	0.986578
XLOC_001956	2.16608	2.6177	0.671079	0.947254	0.026846	0.013423	0.986577
XLOC_000752	0.272289	0.201807	1.14216	1.4975	0.0268619	0.986569	0.013431
XLOC_001877	0.220336	0.186298	1.39671	1.8751	0.0268945	0.986553	0.0134472
XLOC_005891	2.40023	2.64025	1.7644	1.81448	0.0270051	0.0135025	0.986497
XLOC_000575	1.58695	1.37526	0.797362	0.65954	0.0270222	0.0135111	0.986489
XLOC_004834	5.53663	7.29669	1.16459	1.18699	0.027061	0.0135305	0.98647
XLOC_000829	3.6572	2.90717	0.967144	1.0804	0.0270631	0.0135316	0.986468
XLOC_003511	0.421379	0.323724	0.851171	1.01195	0.0271612	0.986419	0.0135806
XLOC_002849	0.570071	0.591989	1.21154	1.03106	0.0271613	0.986419	0.0135807
XLOC_000524	0.616608	0.538008	1.16883	1.01458	0.0271678	0.986416	0.0135839
XLOC_004778	5.37553	7.1159	0.57252	1.10452	0.0271701	0.013585	0.986415
XLOC_000984	1.34057	1.55907	0.757866	0.626127	0.0271879	0.0135939	0.986406
XLOC_003846	0.471731	0.393353	1.52681	1.2196	0.0272451	0.986377	0.0136225
XLOC_006007	5.48843	6.82873	1.90385	1.07504	0.0273161	0.013658	0.986342
XLOC_000751	2.31571	2.58557	0.86088	1.24768	0.0273558	0.0136779	0.986322
XLOC_005956	2.2444	2.63481	0.90719	0.460312	0.0273857	0.0136929	0.986307
XLOC_001141	12.5852	17.5444	0.31823	0.484333	0.0274536	0.0137268	0.986273
XLOC_006271	2.86555	3.88896	0.400054	0.262869	0.0275502	0.0137751	0.986225
XLOC_000914	4.96482	6.63382	0.945498	0.718484	0.0275625	0.0137812	0.986219
XLOC_001976	4.35596	5.60088	0.887071	1.31262	0.0275809	0.0137904	0.98621
XLOC_005488	1.4787	1.75152	0.668034	0.429883	0.0276532	0.0138266	0.986173
XLOC_006157	1.65866	1.97091	0.865593	0.908312	0.0276535	0.0138267	0.986173
XLOC_003999	0.345961	0.322465	0.990078	1.25739	0.0276859	0.986157	0.0138429
XLOC_003340	1.19289	1.23481	1.81082	2.05107	0.0277202	0.98614	0.0138601
XLOC_002329	9.06978	12.0434	1.34735	1.9389	0.0277273	0.0138637	0.986136
XLOC_004068	5.47064	7.25276	1.12505	0.500723	0.0277529	0.0138764	0.986124
XLOC_003935	3.21778	3.92833	0.698435	1.23109	0.0277773	0.0138887	0.986111
XLOC_001382	0.274598	0.277514	1.67848	1.27042	0.0277854	0.986107	0.0138927
XLOC_005855	2.39283	3.00579	0.83099	0.925741	0.0278006	0.0139003	0.9861
XLOC_004020	7.8178	10.051	2.15662	1.02575	0.0278429	0.0139214	0.986079
XLOC_004302	2.73372	2.75878	1.43159	0.891992	0.0278492	0.0139246	0.986075
XLOC_002775	1.66851	1.98528	0.873319	0.91024	0.0278673	0.0139336	0.986066
XLOC_005262	3.44301	4.37925	1.11228	0.687336	0.0279288	0.0139644	0.986036
XLOC_003329	8.44272	10.883	1.04904	2.27785	0.0279472	0.0139736	0.986026
XLOC_000759	0.467627	0.3543	1.11676	1.37931	0.0279575	0.986021	0.0139788
XLOC_006370	4.1706	4.76348	1.14714	1.94895	0.0279587	0.0139793	0.986021
XLOC_000385	0.195746	0.104575	0.514613	0.447714	0.0279606	0.98602	0.0139803
XLOC_000599	0.458322	0.414066	1.08524	0.900264	0.0279764	0.986012	0.0139882
XLOC_003361	1.5541	1.77105	1.03207	1.02232	0.0279851	0.0139925	0.986007
XLOC_000301	0.210393	0.347834	1.10272	1.40677	0.0280183	0.985991	0.0140091
XLOC_003659	0.423789	0.39175	0.906137	1.10873	0.0280244	0.985988	0.0140122
XLOC_002463	1.65274	1.32198	0.517268	0.523288	0.0280293	0.0140147	0.985985
XLOC_002129	0.570396	0.407865	1.2162	1.06365	0.0280995	0.98595	0.0140498
XLOC_001550	4.97138	6.50713	1.32767	1.02901	0.0281795	0.0140898	0.98591
XLOC_001581	0.548462	0.640841	0.867144	0.90579	0.0281986	0.985901	0.0140993
XLOC_004839	3.97989	4.40742	2.17248	1.4799	0.0283	0.01415	0.98585
XLOC_001072	0.464377	0.40133	1.67819	2.19071	0.0283149	0.985843	0.0141575
XLOC_006374	1.77765	1.95208	1.18182	0.974934	0.0283439	0.0141719	0.985828
XLOC_004320	1.27045	1.3073	0.174702	0.500209	0.0283822	0.0141911	0.985809
XLOC_001105	2.3469	2.62757	1.67468	1.66949	0.0283916	0.0141958	0.985804
XLOC_001603	4.03088	5.05776	1.13348	1.54347	0.0284756	0.0142378	0.985762
XLOC_002263	0.919436	0.920865	0.658926	0.735832	0.0285354	0.0142677	0.985732
XLOC_002437	2.19763	2.18082	1.59231	1.34366	0.0285749	0.0142874	0.985713
XLOC_001589	1.95117	1.98269	0.918278	0.481543	0.0285844	0.0142922	0.985708
XLOC_005651	0.22285	0.209736	1.81408	1.34323	0.0286087	0.985696	0.0143043
XLOC_001234	2.33169	2.74963	0.296004	0.836076	0.0286237	0.0143118	0.985688
XLOC_003358	2.2133	2.58467	1.09062	0.735052	0.0286426	0.0143213	0.985679
XLOC_004650	0.686643	0.621154	1.0551	1.20655	0.0286437	0.985678	0.0143218
XLOC_000854	5.81945	7.94287	0.50332	0.835624	0.0286495	0.0143248	0.985675
XLOC_002065	2.2726	2.7355	0.739074	1.04927	0.0286695	0.0143348	0.985665
XLOC_001131	2.27912	2.95189	0.52809	0.696548	0.0286844	0.0143422	0.985658
XLOC_003075	0.344851	0.294089	0.658114	0.788405	0.0286958	0.985652	0.0143479
XLOC_005297	1.82442	1.60554	0.558633	0.835261	0.0287293	0.0143646	0.985635
XLOC_003957	0.679556	0.626391	1.34262	1.62573	0.0287387	0.985631	0.0143694
XLOC_004234	7.88288	10.8134	0.970324	0.792175	0.0287681	0.014384	0.985616
XLOC_005627	1.44494	1.50367	1.16074	1.23627	0.0287915	0.0143958	0.985604
XLOC_000439	0.122346	0.118233	1.89582	1.37078	0.0288115	0.985594	0.0144058
XLOC_001493	1.20613	1.33665	0.683744	0.810582	0.0288353	0.0144177	0.985582
XLOC_005561	1.8564	1.5934	0.902989	0.975419	0.0288382	0.0144191	0.985581
XLOC_004464	3.71138	4.78349	1.13558	1.18072	0.0288633	0.0144317	0.985568
XLOC_004384	2.46973	2.9478	1.17432	0.821018	0.0288731	0.0144366	0.985563
XLOC_004647	1.5243	1.74897	0.769651	0.504645	0.0289045	0.0144522	0.985548
XLOC_005981	1.5793	1.46199	0.695416	0.914807	0.0289179	0.0144589	0.985541
XLOC_005592	1.79981	1.94796	0.395317	0.811528	0.0289259	0.014463	0.985537
XLOC_005563	0.696229	0.876984	1.44267	1.63081	0.0289363	0.985532	0.0144682
XLOC_001038	4.38171	5.62406	1.06084	1.45348	0.028942	0.014471	0.985529
XLOC_006171	3.57742	4.38264	0.640051	1.30815	0.0289794	0.0144897	0.98551
XLOC_005286	0.654896	0.808898	1.41784	1.6512	0.0290245	0.985488	0.0145122
XLOC_005088	0.928988	0.87219	1.11528	1.0775	0.0290311	0.985484	0.0145155
XLOC_002125	3.65584	4.35377	0.438364	1.28414	0.029099	0.0145495	0.985451
XLOC_000052	1.01061	0.927584	0.51943	0.353122	0.0291042	0.0145521	0.985448
XLOC_004681	3.76459	4.78664	0.349927	1.06254	0.0291371	0.0145686	0.985431
XLOC_005896	2.72818	2.23136	1.06959	0.914578	0.0292603	0.0146302	0.98537
XLOC_006514	0.73364	0.716796	1.5796	1.32563	0.0292734	0.985363	0.0146367
XLOC_003639	1.8285	2.28923	0.760756	0.708217	0.0293096	0.0146548	0.985345
XLOC_006189	2.74491	3.37874	1.14831	0.774184	0.0293479	0.014674	0.985326
XLOC_006172	1.6746	1.87291	0.654946	0.934801	0.0293503	0.0146751	0.985325
XLOC_000649	2.46378	3.10282	0.952031	0.96646	0.029355	0.0146775	0.985322
XLOC_004112	2.19199	1.79948	0.75583	0.471981	0.0293732	0.0146866	0.985313
XLOC_003828	4.86154	3.62043	0.668572	0.159262	0.0293735	0.0146867	0.985313
XLOC_005769	2.34653	2.51379	0.239459	0.874577	0.0293866	0.0146933	0.985307
XLOC_003670	4.56367	5.56181	1.16133	1.89675	0.0294231	0.0147115	0.985288
XLOC_003272	1.60946	1.83428	0.722838	0.378635	0.0294538	0.0147269	0.985273
XLOC_005303	1.88134	1.90701	0.530554	0.937243	0.0294799	0.01474	0.98526
XLOC_002713	3.82922	5.05567	0.965421	0.933384	0.0294837	0.0147418	0.985258
XLOC_000213	0.209393	0.241171	0.61881	0.504882	0.0295149	0.985243	0.0147575
XLOC_003023	0.187479	0.149923	1.18689	1.61964	0.0295823	0.985209	0.0147911
XLOC_001237	1.79888	2.13108	1.01683	0.887304	0.0296094	0.0148047	0.985195
XLOC_002948	2.489	3.02996	0.939098	0.454408	0.0296272	0.0148136	0.985186
XLOC_005833	2.22525	2.73789	0.550841	0.897501	0.02963	0.014815	0.985185
XLOC_004662	4.55527	5.45062	1.53109	0.43168	0.0296986	0.0148493	0.985151
XLOC_005853	1.42933	1.594	0.998297	0.881492	0.029782	0.014891	0.985109
XLOC_000690	2.04739	2.63951	0.656763	0.419745	0.0298178	0.0149089	0.985091
XLOC_000261	1.86108	1.53816	0.787582	0.673574	0.0298311	0.0149155	0.985084
XLOC_003848	5.27917	7.14084	0.925033	0.957979	0.029835	0.0149175	0.985083
XLOC_000064	1.76962	1.67542	1.30222	1.15531	0.0298403	0.0149201	0.98508
XLOC_001640	0.591456	0.579793	1.0092	0.882286	0.0299163	0.985042	0.0149581
XLOC_001566	3.45505	4.63148	0.719188	0.281022	0.02998	0.01499	0.98501
XLOC_003945	2.60296	3.27589	0.941751	1.07043	0.0299905	0.0149953	0.985005
XLOC_003981	0.331023	0.238196	1.31106	1.01389	0.0300326	0.984984	0.0150163
XLOC_002123	1.9993	1.72605	0.719304	0.331138	0.0300797	0.0150398	0.98496
XLOC_001965	3.52903	4.53037	1.24863	1.00056	0.0301077	0.0150538	0.984946
XLOC_005539	2.76771	2.32923	0.738222	1.11257	0.0301263	0.0150632	0.984937
XLOC_000937	3.20312	3.91156	1.42953	1.59297	0.030146	0.015073	0.984927
XLOC_000364	2.03101	2.64939	0.599465	0.602516	0.0301812	0.0150906	0.984909
XLOC_004831	1.44399	1.55141	0.984435	0.797116	0.0302187	0.0151094	0.984891
XLOC_000129	0.677146	0.829835	1.20683	1.17584	0.0302278	0.984886	0.0151139
XLOC_000163	1.69163	1.88202	0.782235	1.031	0.0302354	0.0151177	0.984882
XLOC_001109	4.46879	5.88759	1.12232	1.23647	0.0302463	0.0151231	0.984877
XLOC_006220	0.791566	0.884772	1.32846	1.51412	0.0302945	0.984853	0.0151473
XLOC_001701	0.468456	0.28691	0.995221	1.16896	0.030373	0.984814	0.0151865
XLOC_002452	2.74882	3.38213	0.936264	0.343954	0.0305017	0.0152509	0.984749
XLOC_004357	4.16694	5.40279	1.05736	1.37527	0.0305126	0.0152563	0.984744
XLOC_001896	0.947406	0.964588	1.27825	1.41729	0.0305139	0.984743	0.015257
XLOC_005270	0.384493	0.339691	1.29449	1.01449	0.0305561	0.984722	0.015278
XLOC_003608	0.209302	0.219409	0.541571	0.683796	0.0305719	0.984714	0.0152859
XLOC_000520	1.41434	1.67967	0.59969	0.760766	0.0305963	0.0152982	0.984702
XLOC_005856	5.72592	7.91042	0.750222	0.683962	0.0306143	0.0153071	0.984693
XLOC_002493	0.38707	0.55326	1.25342	1.06953	0.0306653	0.984667	0.0153326
XLOC_001315	1.44283	1.65645	0.939842	0.961673	0.0306702	0.0153351	0.984665
XLOC_005861	0.217525	0.182778	1.25309	0.93427	0.0307295	0.984635	0.0153648
XLOC_000869	3.80262	4.7428	0.652339	1.35454	0.0307319	0.0153659	0.984634
XLOC_002649	1.65554	1.56872	1.22011	1.30971	0.0307932	0.0153966	0.984603
XLOC_006327	2.66872	3.07107	1.56268	1.21362	0.0308205	0.0154103	0.98459
XLOC_003270	1.88889	1.80882	0.742172	0.264913	0.0308594	0.0154297	0.98457
XLOC_001685	0.875452	0.738373	1.54109	1.3555	0.030861	0.984569	0.0154305
XLOC_006312	3.37108	4.39829	0.617871	1.02235	0.0309451	0.0154725	0.984527
XLOC_004614	3.53733	4.18468	0.896575	1.58407	0.0309598	0.0154799	0.98452
XLOC_005100	1.96614	2.50758	0.725131	0.503946	0.03099	0.015495	0.984505
XLOC_004873	1.21956	1.12293	0.794466	0.668794	0.0310058	0.0155029	0.984497
XLOC_004123	2.8065	3.66151	0.899248	0.784545	0.0310093	0.0155047	0.984495
XLOC_005162	3.5439	4.78886	0.750905	0.371942	0.0310687	0.0155343	0.984466
XLOC_003131	2.52638	3.0722	1.30617	1.25836	0.0310982	0.0155491	0.984451
XLOC_005128	4.33587	5.18816	1.87057	1.03145	0.0311081	0.015554	0.984446
XLOC_003148	1.61845	1.59514	1.32943	1.20963	0.0312146	0.0156073	0.984393
XLOC_000173	0.477965	0.61193	1.05786	0.957229	0.0312664	0.984367	0.0156332
XLOC_002055	0.328989	0.247627	0.575325	0.526135	0.0312842	0.984358	0.0156421
XLOC_001458	2.9615	3.72477	1.18293	1.26663	0.031312	0.015656	0.984344
XLOC_003774	5.11126	7.09072	0.471841	0.725056	0.031344	0.015672	0.984328
XLOC_004854	2.39298	2.87087	1.16213	0.800602	0.0314074	0.0157037	0.984296
XLOC_004295	0.271242	0.413194	0.90112	1.09186	0.0314663	0.984267	0.0157332
XLOC_003664	0.616571	0.43838	1.08144	1.01664	0.0314884	0.984256	0.0157442
XLOC_006155	0.301809	0.297969	1.45188	1.96394	0.0315127	0.984244	0.0157563
XLOC_002461	4.96694	6.66517	1.1424	0.485842	0.0315649	0.0157825	0.984218
XLOC_005929	0.500019	0.48851	1.48287	1.92298	0.0316064	0.984197	0.0158032
XLOC_002048	0.45381	0.337858	1.09994	1.38612	0.031641	0.984179	0.0158205
XLOC_003417	1.92461	1.945	1.10699	1.36154	0.0316519	0.015826	0.984174
XLOC_000338	1.20021	1.13965	0.826404	0.688461	0.0317649	0.0158824	0.984118
XLOC_004520	0.184216	0.0922393	1.57055	2.20258	0.0317819	0.984109	0.0158909
XLOC_005487	0.617065	0.738518	1.19652	1.38467	0.0318028	0.984099	0.0159014
XLOC_001746	0.843916	0.857734	1.71286	1.44653	0.0318782	0.984061	0.0159391
XLOC_002429	4.34248	5.2563	0.776147	1.70553	0.0319399	0.01597	0.98403
XLOC_003979	0.421937	0.393087	1.58981	1.22475	0.0319425	0.984029	0.0159712
XLOC_001478	0.244259	0.227155	1.44425	1.07031	0.0319666	0.984017	0.0159833
XLOC_006431	1.13307	1.39113	0.384773	0.528167	0.0319696	0.0159848	0.984015
XLOC_005893	3.23003	3.64336	1.63094	0.964377	0.0320059	0.0160029	0.983997
XLOC_000606	3.48058	4.34292	1.55098	1.57042	0.0320418	0.0160209	0.983979
XLOC_001342	7.88844	10.3088	1.95077	0.308234	0.0320709	0.0160354	0.983965
XLOC_002319	3.90152	5.19148	1.03641	1.02803	0.0320733	0.0160367	0.983963
XLOC_005793	3.72969	4.80553	0.898604	0	0.0320809	0.0160404	0.98396
XLOC_006415	0.258736	0.31714	1.28269	0.978805	0.032089	0.983956	0.0160445
XLOC_001729	4.80826	6.57759	0.912647	0.824058	0.032094	0.016047	0.983953
XLOC_003199	0.475312	0.421749	0.592774	0.596744	0.0321128	0.983944	0.0160564
XLOC_002606	3.88495	5.13236	1.10672	0.617829	0.0321336	0.0160668	0.983933
XLOC_006179	2.84338	3.53093	1.24334	0.867845	0.0321493	0.0160747	0.983925
XLOC_004917	2.01462	1.90697	0.954511	1.25103	0.0321712	0.0160856	0.983914
XLOC_000681	0.590747	0.524068	1.29789	1.07619	0.0321769	0.983912	0.0160885
XLOC_003598	2.39552	2.9523	1.01425	1.17777	0.0321888	0.0160944	0.983906
XLOC_000550	2.5069	2.57306	1.41364	1.75858	0.0322651	0.0161325	0.983867
XLOC_003216	0.514263	0.423864	1.33371	1.07769	0.0323247	0.983838	0.0161624
XLOC_003755	3.18103	3.40602	1.43579	0.634202	0.0323339	0.016167	0.983833
XLOC_006060	3.5458	4.71864	0.983604	0.904811	0.0323487	0.0161743	0.983826
XLOC_005813	0.637079	0.571349	0.886091	0.990501	0.0324455	0.983777	0.0162228
XLOC_005670	0.252701	0.134131	1.00624	1.35051	0.0325089	0.983746	0.0162544
XLOC_004075	0.328928	0.484098	0.92509	0.841334	0.0325459	0.983727	0.016273
XLOC_004362	1.41452	1.56183	0.769567	0.949514	0.0325512	0.0162756	0.983724
XLOC_000668	1.62475	1.80363	0.936468	0.644778	0.0326449	0.0163224	0.983678
XLOC_004813	2.20869	2.58607	1.1055	0.699123	0.0327208	0.0163604	0.98364
XLOC_003658	2.4124	2.1947	0.950614	1.32447	0.0327354	0.0163677	0.983632
XLOC_004355	6.76741	9.40433	1.03645	0.921265	0.0327949	0.0163975	0.983603
XLOC_001460	2.16082	2.4545	1.26539	0.923231	0.032836	0.016418	0.983582
XLOC_003656	1.56423	1.98625	0.659105	0.562884	0.0328628	0.0164314	0.983569
XLOC_004876	0.243321	0.275693	1.07796	1.45013	0.03288	0.98356	0.01644
XLOC_000006	7.82935	10.9902	0.804174	0.991538	0.0328975	0.0164487	0.983551
XLOC_006446	2.50548	3.17493	1.05207	1.02868	0.0329283	0.0164641	0.983536
XLOC_000621	0.245316	0.254085	1.10179	0.834529	0.0329298	0.983535	0.0164649
XLOC_004806	0.440863	0.423144	1.01846	1.28623	0.0329888	0.983506	0.0164944
XLOC_006447	3.7331	4.87259	0.852519	1.26008	0.0330265	0.0165132	0.983487
XLOC_000802	0.281355	0.251581	1.52172	2.0962	0.0330561	0.983472	0.016528
XLOC_005031	1.47804	1.70947	0.707065	0.892398	0.0331362	0.0165681	0.983432
XLOC_001937	3.95402	5.3884	0.827878	0.8403	0.0332067	0.0166033	0.983397
XLOC_002407	3.57572	4.74027	1.06827	1.0096	0.0332081	0.016604	0.983396
XLOC_000492	0.501015	0.391117	1.28199	1.64686	0.0332679	0.983366	0.016634
XLOC_000410	4.41892	6.07994	0.799483	0.826464	0.0333119	0.016656	0.983344
XLOC_003027	0.354259	0.782169	1.6996	1.71636	0.0335273	0.983236	0.0167637
XLOC_004422	4.90858	6.65731	0.752879	1.21446	0.0337189	0.0168595	0.983141
XLOC_002635	6.01366	7.83913	0.88064	1.89649	0.033785	0.0168925	0.983108
XLOC_000250	0.101839	0.0359312	0.592396	0.824624	0.0338136	0.983093	0.0169068
XLOC_000477	1.89274	1.86626	1.64438	1.53893	0.033865	0.0169325	0.983068
XLOC_003180	2.21626	2.76706	0.904659	0.515513	0.0340067	0.0170034	0.982997
XLOC_000678	2.09875	2.64195	0.593743	0.887143	0.0340472	0.0170236	0.982976
XLOC_002596	2.01579	1.809	1.07522	0.760247	0.0340538	0.0170269	0.982973
XLOC_003927	1.53433	1.80238	0.810337	0.548573	0.0340617	0.0170309	0.982969
XLOC_002368	3.69317	4.89858	0.800285	1.15862	0.0341164	0.0170582	0.982942
XLOC_002819	2.35571	2.81448	0.700779	1.13564	0.0341227	0.0170613	0.982939
XLOC_001962	2.86198	3.79228	0.880171	0.870331	0.0341607	0.0170803	0.98292
XLOC_002480	2.81915	3.82039	0.478175	0.726328	0.0341853	0.0170927	0.982907
XLOC_000824	1.72266	1.58625	1.22558	1.09722	0.0342383	0.0171192	0.982881
XLOC_001874	2.13848	2.4963	1.38238	1.36759	0.0342571	0.0171285	0.982871
XLOC_005343	0.538677	0.457147	1.3529	1.74375	0.0342738	0.982863	0.0171369
XLOC_000594	6.19949	8.68641	0.851969	0.940591	0.0342757	0.0171379	0.982862
XLOC_000281	2.37741	2.68746	1.55245	1.70178	0.0342771	0.0171385	0.982861
XLOC_006079	2.46114	3.09008	0.631353	1.02311	0.0343077	0.0171539	0.982846
XLOC_000516	2.5607	2.76242	1.13539	1.58721	0.034349	0.0171745	0.982826
XLOC_006421	1.89106	1.93407	0.949966	0.500062	0.0343547	0.0171773	0.982823
XLOC_004887	2.04207	2.60113	0.704244	0.293535	0.034357	0.0171785	0.982822
XLOC_006156	2.20567	2.09879	1.30951	0.931558	0.0343769	0.0171885	0.982812
XLOC_003032	4.22611	4.44704	1.42588	0.0792157	0.0343866	0.0171933	0.982807
XLOC_004212	1.16682	1.27221	0.768254	0.876699	0.0344064	0.0172032	0.982797
XLOC_005987	7.65461	10.3913	1.88649	0.912458	0.034435	0.0172175	0.982783
XLOC_004247	1.19031	0.989468	0.569146	0.553285	0.0344419	0.017221	0.982779
XLOC_003348	3.49079	4.60209	1.16717	1.08644	0.034536	0.017268	0.982732
XLOC_000133	0.50016	0.746676	1.43238	1.29424	0.034585	0.982708	0.0172925
XLOC_005559	2.3534	2.80036	0.751838	1.17605	0.0346077	0.0173039	0.982696
XLOC_003385	4.90601	5.10554	2.13019	0.789795	0.0346317	0.0173159	0.982684
XLOC_003368	4.0059	5.47923	0.541317	0.950548	0.034702	0.017351	0.982649
XLOC_004841	4.34431	5.02907	1.09317	2.06603	0.0347529	0.0173765	0.982624
XLOC_001664	1.62638	1.62769	0.794128	0.39969	0.0347545	0.0173772	0.982623
XLOC_002078	1.27353	1.47435	0.847624	0.763821	0.034763	0.0173815	0.982618
XLOC_001430	0.336339	0.278888	1.02391	0.799629	0.0348081	0.982596	0.017404
XLOC_005871	1.8379	2.09224	0.798012	0.321827	0.0349774	0.0174887	0.982511
XLOC_004047	0.800146	0.813823	0.483939	0.587339	0.0350089	0.0175045	0.982496
XLOC_003333	2.25474	2.18121	1.02351	0.460822	0.0350328	0.0175164	0.982484
XLOC_004939	0.516419	0.474565	0.889823	1.07195	0.035115	0.982443	0.0175575
XLOC_006219	2.09724	2.71242	0.646025	0.829281	0.0351188	0.0175594	0.982441
XLOC_002090	1.77373	2.11946	0.66646	0.93996	0.0352104	0.0176052	0.982395
XLOC_004844	4.43671	5.56704	0.664263	1.63057	0.0352557	0.0176279	0.982372
XLOC_000532	0.103992	0.0809844	2.9487	2.02513	0.0352605	0.98237	0.0176302
XLOC_003964	0.193743	0.212253	0.813069	1.10405	0.0352704	0.982365	0.0176352
XLOC_000671	1.61307	1.94167	0.93937	0.901447	0.0352874	0.0176437	0.982356
XLOC_001240	4.67886	6.32292	1.32331	1.01778	0.0353168	0.0176584	0.982342
XLOC_002951	0.855631	0.579148	1.42158	1.49863	0.0353657	0.982317	0.0176829
XLOC_002705	3.81871	3.60004	1.63091	0.664475	0.0354285	0.0177143	0.982286
XLOC_000399	0.548734	0.269762	1.11945	1.14849	0.0354657	0.982267	0.0177328
XLOC_003304	1.9048	1.81661	1.22231	1.4131	0.035476	0.017738	0.982262
XLOC_003864	0.752675	0.537141	1.20131	1.2871	0.0354768	0.982262	0.0177384
XLOC_001321	3.38373	3.76918	1.5362	0.656258	0.0355192	0.0177596	0.98224
XLOC_000377	3.51751	4.44749	1.39654	1.62455	0.0355247	0.0177624	0.982238
XLOC_006360	2.51432	2.70515	1.00128	0.257622	0.0355837	0.0177918	0.982208
XLOC_003176	0.252538	0.366009	0.974266	1.26789	0.0355952	0.982202	0.0177976
XLOC_002230	2.18382	2.21893	1.15924	1.49622	0.0356025	0.0178012	0.982199
XLOC_004980	0.309658	0.207487	1.19354	0.904375	0.0356399	0.98218	0.0178199
XLOC_005121	0.348656	0.386074	2.8927	2.07201	0.0357123	0.982144	0.0178561
XLOC_000160	1.31889	1.6613	0.625718	0.561215	0.0357403	0.0178702	0.98213
XLOC_002940	0.146959	0.0837324	0.984479	1.39774	0.0357452	0.982127	0.0178726
XLOC_004948	0.648282	0.654216	1.22651	1.03935	0.0357641	0.982118	0.0178821
XLOC_002683	2.53692	3.14232	1.30512	1.12036	0.0358225	0.0179113	0.982089
XLOC_003847	2.51726	3.12652	0.915464	1.22286	0.0358703	0.0179352	0.982065
XLOC_005660	0.491219	0.45428	1.66147	1.27552	0.0358754	0.982062	0.0179377
XLOC_000203	9.12131	12.3857	2.15979	2.49868	0.0359122	0.0179561	0.982044
XLOC_001279	3.10939	4.29753	0.706331	0.551122	0.0359338	0.0179669	0.982033
XLOC_005241	0.357345	0.253232	0.737316	0.910662	0.0359564	0.982022	0.0179782
XLOC_000014	2.52295	3.04216	1.39527	1.4764	0.0360224	0.0180112	0.981989
XLOC_004280	3.97052	4.92884	1.42339	0.440313	0.0360312	0.0180156	0.981984
XLOC_000339	0.504225	0.437158	1.20946	0.975948	0.0360874	0.981956	0.0180437
XLOC_005413	0.420763	0.30639	2.32898	3.27467	0.0361043	0.981948	0.0180521
XLOC_004088	1.18333	1.13579	0.312956	0.586262	0.0361148	0.0180574	0.981943
XLOC_004297	0.82982	0.716297	1.41705	1.23339	0.0361678	0.981916	0.0180839
XLOC_002972	0.6553	0.502978	1.36373	1.14732	0.0362049	0.981898	0.0181024
XLOC_000393	1.05461	1.17171	0.570911	0.713268	0.0362127	0.0181063	0.981894
XLOC_002917	1.11473	1.36127	0.50826	0.608168	0.0362157	0.0181078	0.981892
XLOC_001958	1.29298	1.31816	0.842942	0.619467	0.0362549	0.0181274	0.981873
XLOC_001918	4.2331	5.71897	1.19948	1.17004	0.0363344	0.0181672	0.981833
XLOC_004018	2.08072	2.25974	1.63098	1.4654	0.0363387	0.0181693	0.981831
XLOC_004134	2.13196	2.76764	0.858084	0.699691	0.0363474	0.0181737	0.981826
XLOC_003612	4.13596	5.47697	1.30301	1.43713	0.0363673	0.0181837	0.981816
XLOC_001912	0.471612	0.228171	0.977951	0.963957	0.0364445	0.981778	0.0182222
XLOC_003719	0.854013	0.868482	0.996364	1.06037	0.0364476	0.981776	0.0182238
XLOC_000151	1.48694	1.7299	0.960287	1.00194	0.0365053	0.0182526	0.981747
XLOC_004512	0.849122	0.572914	1.40305	1.43292	0.0365056	0.981747	0.0182528
XLOC_000832	0.472467	0.404504	1.13758	1.47121	0.0365483	0.981726	0.0182741
XLOC_003425	2.43345	2.53371	1.35626	0.815156	0.0366304	0.0183152	0.981685
XLOC_000543	2.204	2.69499	1.00513	1.20375	0.0366465	0.0183232	0.981677
XLOC_002479	0.621281	0.637789	1.00553	1.18904	0.0366718	0.981664	0.0183359
XLOC_005207	0.413482	0.337008	1.41987	1.92529	0.0366894	0.981655	0.0183447
XLOC_001782	0.9189	1.02785	0.519484	0.333483	0.0367139	0.018357	0.981643
XLOC_004920	2.542	3.42678	0.734372	0.748473	0.0367782	0.0183891	0.981611
XLOC_000571	2.09984	2.63223	0.64428	0.957348	0.0367905	0.0183953	0.981605
XLOC_000815	0.368499	0.197891	2.17145	3.08043	0.0368229	0.981589	0.0184115
XLOC_004166	3.17772	4.06831	1.23138	0.663224	0.0368287	0.0184144	0.981586
XLOC_006369	4.09452	3.1529	1.09611	1.28577	0.0368328	0.0184164	0.981584
XLOC_004638	0.548241	0.677187	1.95931	1.53076	0.0369032	0.981548	0.0184516
XLOC_000386	1.603	1.98929	0.616385	0.804894	0.0370347	0.0185174	0.981483
XLOC_000046	0.31864	0.239337	0.927187	1.23535	0.0371497	0.981425	0.0185749
XLOC_000495	2.29562	2.74062	1.3973	1.39525	0.0371595	0.0185797	0.98142
XLOC_002396	0.751515	0.761712	1.21815	1.44647	0.0372145	0.981393	0.0186072
XLOC_005272	0.481177	0.683368	1.19617	1.09874	0.0372363	0.981382	0.0186182
XLOC_005614	1.93399	2.3604	0.724596	0.211804	0.0372537	0.0186268	0.981373
XLOC_003881	0.518466	0.520085	1.17231	1.49618	0.0372872	0.981356	0.0186436
XLOC_001151	0.411016	0.279133	1.69982	2.35539	0.0372939	0.981353	0.018647
XLOC_001771	5.32274	7.2282	1.41602	0.501194	0.037313	0.0186565	0.981343
XLOC_003866	1.19504	1.44652	0.537956	0.671501	0.0373311	0.0186655	0.981334
XLOC_000639	1.14006	1.49324	0.41722	0.436984	0.0373325	0.0186662	0.981334
XLOC_005960	1.85015	2.15474	0.457241	0.889741	0.0374022	0.0187011	0.981299
XLOC_000722	1.11263	0.804046	1.88673	1.74175	0.0374561	0.981272	0.018728
XLOC_006221	2.39663	3.25379	0.7051	0.434865	0.037486	0.018743	0.981257
XLOC_005511	0.374253	0.358517	1.65024	2.28934	0.0375205	0.98124	0.0187602
XLOC_000628	0.385446	0.507441	1.27324	1.02141	0.0376152	0.981192	0.0188076
XLOC_003711	0.418244	0.389116	0.977725	0.788487	0.0376364	0.981182	0.0188182
XLOC_001979	0.388019	0.517475	2.05543	1.53505	0.0376485	0.981176	0.0188243
XLOC_003811	0.598821	0.4652	1.43086	1.15696	0.037749	0.981125	0.0188745
XLOC_002143	2.46629	2.75746	0.843459	1.37038	0.0377545	0.0188772	0.981123
XLOC_004851	3.52369	4.2227	1.44665	0.526186	0.037817	0.0189085	0.981092
XLOC_002707	4.37319	4.75558	2.37691	1.36912	0.0378391	0.0189196	0.98108
XLOC_000149	5.11312	7.30288	0.680682	0.800175	0.0379452	0.0189726	0.981027
XLOC_000845	2.13397	2.87406	0.688147	0.608058	0.0379456	0.0189728	0.981027
XLOC_001322	4.49833	4.89353	0.752748	2.02148	0.0380369	0.0190185	0.980982
XLOC_004899	0.522643	0.460042	0.651688	0.685786	0.0380783	0.980961	0.0190392
XLOC_006046	2.96999	4.04783	0.64252	0.88402	0.0381602	0.0190801	0.98092
XLOC_005820	1.72947	1.91425	0.986807	1.21139	0.0381742	0.0190871	0.980913
XLOC_000928	1.81212	1.97746	0.855054	0.365057	0.0382011	0.0191005	0.980899
XLOC_001029	0.678089	0.648949	1.20626	1.02601	0.0383615	0.980819	0.0191807
XLOC_005147	2.99246	3.48762	1.33078	0.544785	0.0383755	0.0191877	0.980812
XLOC_000781	6.91494	9.74841	1.44364	1.03308	0.0383983	0.0191991	0.980801
XLOC_000993	2.17638	1.80658	1.05083	1.09024	0.038433	0.0192165	0.980784
XLOC_005248	2.85598	3.90501	0.744643	0.815405	0.038522	0.019261	0.980739
XLOC_001644	6.28189	4.5215	1.14162	0.795707	0.0385911	0.0192956	0.980704
XLOC_002840	2.69753	3.67606	0.81426	0.684705	0.0386421	0.0193211	0.980679
XLOC_003328	0.186781	0.163349	1.66594	1.1641	0.0386746	0.980663	0.0193373
XLOC_004386	2.2133	2.85105	0.973123	0.939425	0.0386905	0.0193452	0.980655
XLOC_000240	0.612267	0.48097	0.863907	0.887836	0.0387058	0.980647	0.0193529
XLOC_002436	1.66399	1.82248	1.22239	1.02813	0.0387696	0.0193848	0.980615
XLOC_002257	1.31971	1.36466	1.14708	1.19896	0.0387863	0.0193931	0.980607
XLOC_002697	0.313565	0.261809	1.16739	1.61159	0.0388052	0.980597	0.0194026
XLOC_000224	0.465832	0.309249	0.783502	0.76717	0.0388194	0.98059	0.0194097
XLOC_000110	1.55557	1.25215	0.303673	0.556995	0.0388277	0.0194138	0.980586
XLOC_003472	2.51259	2.31818	1.21242	0.63976	0.0388374	0.0194187	0.980581
XLOC_000435	1.14497	1.27458	0.695986	0.824621	0.0388731	0.0194365	0.980563
XLOC_004310	3.67352	5.31333	0.365489	0.515609	0.0388786	0.0194393	0.980561
XLOC_001187	0.531008	0.745373	1.36559	1.64581	0.0389507	0.980525	0.0194753
XLOC_000625	0.373655	0.450632	0.844395	1.04736	0.0389508	0.980525	0.0194754
XLOC_000311	0.624017	0.509683	0.861292	0.842171	0.0389895	0.980505	0.0194947
XLOC_004630	2.72433	3.37966	1.40781	1.06723	0.0390112	0.0195056	0.980494
XLOC_000871	1.73003	2.18884	0.667745	0.84175	0.0390642	0.0195321	0.980468
XLOC_005565	4.76723	6.40547	1.561	0.856586	0.0390711	0.0195356	0.980464
XLOC_002501	0.563195	0.657632	1.2656	1.58368	0.0390978	0.980451	0.0195489
XLOC_002335	4.40677	5.85444	1.06483	1.60834	0.0391087	0.0195543	0.980446
XLOC_006170	3.33239	4.07891	1.26873	0.354083	0.0391716	0.0195858	0.980414
XLOC_004599	4.70136	6.11824	0.72592	1.69109	0.0391971	0.0195986	0.980401
XLOC_001638	11.9398	17.5883	0.778883	1.0388	0.0392064	0.0196032	0.980397
XLOC_003084	2.23294	2.48773	0.760262	1.25112	0.0392329	0.0196165	0.980384
XLOC_001065	0.483062	0.454453	0.941718	1.18225	0.0392448	0.980378	0.0196224
XLOC_001287	2.48095	2.61644	0.708922	1.32074	0.039283	0.0196415	0.980359
XLOC_004366	0.204704	0.167314	1.28078	1.84202	0.0393612	0.980319	0.0196806
XLOC_003412	2.18621	2.62679	0.531042	1.02962	0.0393946	0.0196973	0.980303
XLOC_005079	10.0315	14.4908	0.986968	1.56008	0.0394008	0.0197004	0.9803
XLOC_005342	1.51832	1.74715	0.92024	1.05276	0.0394031	0.0197016	0.980298
XLOC_001385	0.665253	0.627386	0.965665	1.12438	0.0394112	0.980294	0.0197056
XLOC_000567	0.697346	0.474935	1.13342	1.12623	0.0394206	0.98029	0.0197103
XLOC_001401	0.594204	0.74593	1.26404	1.5172	0.0394771	0.980261	0.0197385
XLOC_000973	3.20076	4.18763	1.31356	1.24502	0.0394842	0.0197421	0.980258
XLOC_003685	1.60289	1.88271	1.06378	0.952113	0.0395457	0.0197728	0.980227
XLOC_005683	1.55417	1.74253	0.94356	0.649172	0.0395859	0.0197929	0.980207
XLOC_001193	6.90451	9.39924	2.20503	1.56948	0.0397203	0.0198601	0.98014
XLOC_006297	4.21638	6.10932	0.637076	0.420944	0.0397591	0.0198795	0.98012
XLOC_001985	2.20531	2.98085	0.687124	0.313501	0.0397929	0.0198964	0.980104
XLOC_002804	0.121161	0.123977	1.39098	0.95815	0.0398117	0.980094	0.0199058
XLOC_004268	0.521601	0.456308	0.285823	0.32413	0.0398164	0.0199082	0.980092
XLOC_004246	1.60902	1.45763	1.15094	1.1726	0.0398356	0.0199178	0.980082
XLOC_004743	1.63157	1.34418	0.762706	0.593864	0.0398588	0.0199294	0.980071
XLOC_004982	3.32377	3.87004	0.98062	1.72623	0.0399122	0.0199561	0.980044
XLOC_005535	2.64814	3.56798	0.896483	0.55207	0.0399194	0.0199597	0.98004
XLOC_005499	0.656462	0.499283	0.970114	0.952137	0.0400572	0.979971	0.0200286
XLOC_003011	1.49279	1.24625	0.773384	0.771356	0.0400721	0.020036	0.979964
XLOC_005353	1.62076	1.97611	0.629444	0.875263	0.0401048	0.0200524	0.979948
XLOC_002799	0.955045	1.0252	0.730908	0.621726	0.0401975	0.0200988	0.979901
XLOC_004317	1.88311	1.88474	0.826669	0.275284	0.0402157	0.0201079	0.979892
XLOC_001405	1.34268	1.34985	1.08997	1.1776	0.0402433	0.0201216	0.979878
XLOC_003705	5.71185	8.10378	1.23905	0.90307	0.0402463	0.0201232	0.979877
XLOC_002356	0.590323	0.362491	1.24837	1.0783	0.0402566	0.979872	0.0201283
XLOC_002085	0.179385	0.360106	0.997651	1.31783	0.0402839	0.979858	0.020142
XLOC_004523	2.82448	3.1094	1.36838	0.597546	0.0403181	0.0201591	0.979841
XLOC_005517	4.62206	4.45847	1.87139	0.488284	0.0403615	0.0201807	0.979819
XLOC_004799	1.84573	2.31098	0.430359	0.81462	0.0403653	0.0201827	0.979817
XLOC_004091	1.27958	1.41439	0.861998	0.659781	0.0404003	0.0202002	0.9798
XLOC_003336	2.13622	1.79384	1.14931	1.02606	0.0404173	0.0202086	0.979791
XLOC_006052	2.52291	3.35265	0.42162	0.880906	0.0404183	0.0202092	0.979791
XLOC_005655	0.481638	0.551393	1.42198	1.88956	0.0404543	0.979773	0.0202271
XLOC_003747	0.269396	0.254506	1.23023	0.897681	0.0404717	0.979764	0.0202359
XLOC_002275	3.03266	4.23346	0.740796	0.739319	0.0404743	0.0202371	0.979763
XLOC_005817	1.73779	1.66584	1.04746	0.714094	0.0405313	0.0202656	0.979734
XLOC_003707	2.31399	2.33096	0.927157	1.40683	0.0405328	0.0202664	0.979734
XLOC_005965	0.116747	0.139559	1.32831	0.91596	0.0405487	0.979726	0.0202743
XLOC_002243	0.547667	0.647017	2.08416	1.58065	0.0405598	0.97972	0.0202799
XLOC_002202	0.317977	0.21886	1.08652	1.50114	0.0405961	0.979702	0.0202981
XLOC_002134	3.29709	3.15282	1.45144	0.534655	0.0406116	0.0203058	0.979694
XLOC_001555	1.66494	2.26237	0.555284	0.381427	0.0406648	0.0203324	0.979668
XLOC_002727	1.9947	2.50914	0.877648	1.03756	0.040685	0.0203425	0.979657
XLOC_001310	0.800625	0.624765	1.13771	1.13266	0.0407215	0.979639	0.0203608
XLOC_004358	0.39665	0.317021	0.993552	1.31648	0.0407728	0.979614	0.0203864
XLOC_005639	2.63982	3.0517	1.14448	1.60033	0.0408255	0.0204127	0.979587
XLOC_002014	4.43535	5.89939	1.66036	1.02498	0.04088	0.02044	0.97956
XLOC_004459	0.567265	0.444085	1.21724	1.56584	0.0408939	0.979553	0.020447
XLOC_005801	1.24681	1.15935	0.749653	0.531831	0.0409034	0.0204517	0.979548
XLOC_002283	0.580296	0.790456	1.25173	1.4264	0.0410194	0.97949	0.0205097
XLOC_001448	0.798044	0.787109	1.04558	1.17914	0.0412084	0.979396	0.0206042
XLOC_006234	0.250344	0.194619	0.951882	1.3337	0.0412482	0.979376	0.0206241
XLOC_004746	1.98531	2.48762	0.909674	0.512184	0.0413615	0.0206807	0.979319
XLOC_002256	2.11752	1.63309	0.737838	0.702471	0.0414709	0.0207355	0.979265
XLOC_004755	1.93926	2.34791	0.849251	0.342506	0.0414954	0.0207477	0.979252
XLOC_005062	0.599985	0.843217	1.29133	1.31211	0.0415312	0.979234	0.0207656
XLOC_001490	3.84407	5.32331	1.06211	1.0753	0.0415397	0.0207698	0.97923
XLOC_004466	0.334516	0.212469	1.24311	1.74199	0.0416226	0.979189	0.0208113
XLOC_006136	0.705962	0.581561	0.994648	0.939228	0.0416411	0.979179	0.0208206
XLOC_002740	1.81985	2.4	0.733093	0.733854	0.0416564	0.0208282	0.979172
XLOC_004840	8.75427	11.992	1.18548	2.66731	0.0416695	0.0208348	0.979165
XLOC_005022	0.572032	0.614114	1.04809	0.894141	0.0417835	0.979108	0.0208918
XLOC_005938	1.73395	1.85632	1.22219	0.948521	0.0418204	0.0209102	0.97909
XLOC_002242	0.562308	0.335053	1.57557	1.23989	0.0418783	0.979061	0.0209392
XLOC_002159	1.37493	1.6101	0.627344	0.248188	0.0419395	0.0209698	0.97903
XLOC_000570	1.73113	2.05342	1.05609	0.808225	0.042026	0.021013	0.978987
XLOC_005841	1.09424	1.18629	1.37985	1.45159	0.0420679	0.978966	0.021034
XLOC_001266	4.54428	6.55659	0.802738	0.8017	0.0420878	0.0210439	0.978956
XLOC_006068	1.85538	2.15252	0.93088	0.462154	0.0422133	0.0211067	0.978893
XLOC_002312	0.596903	0.313241	1.25879	1.12589	0.0422895	0.978855	0.0211447
XLOC_001570	27.6263	18.1098	0.523026	0.437593	0.0423281	0.021164	0.978836
XLOC_003904	2.39039	3.29279	0.722253	0.717623	0.0423731	0.0211866	0.978813
XLOC_004567	1.71098	1.7172	1.04314	1.27856	0.0424366	0.0212183	0.978782
XLOC_003834	2.01918	2.57528	0.224759	0.756431	0.0424707	0.0212353	0.978765
XLOC_000780	2.57786	3.09505	1.30913	1.59326	0.0424952	0.0212476	0.978752
XLOC_000445	0.961821	0.943963	0.743499	0.631958	0.0424991	0.0212496	0.97875
XLOC_000980	2.86156	3.96658	0.761699	0.862223	0.0425754	0.0212877	0.978712
XLOC_004651	0.63449	0.358201	1.14135	1.25907	0.0426243	0.978688	0.0213121
XLOC_000317	1.52298	1.69695	0.93881	1.1164	0.0426635	0.0213318	0.978668
XLOC_004889	2.226	2.47458	1.05694	1.45307	0.0426802	0.0213401	0.97866
XLOC_001208	1.76803	2.29988	0.71341	0.357447	0.0426978	0.0213489	0.978651
XLOC_004729	0.694052	0.811445	0.482824	0.444767	0.0427014	0.0213507	0.978649
XLOC_000422	0.750683	0.528786	1.44735	1.24319	0.0427551	0.978622	0.0213775
XLOC_000821	2.50818	2.24609	1.65334	1.76662	0.0428653	0.0214326	0.978567
XLOC_006432	1.63626	1.96742	0.624304	0.916274	0.0428694	0.0214347	0.978565
XLOC_003129	2.85027	3.79125	0.972333	0.318963	0.0429161	0.0214581	0.978542
XLOC_001222	1.7383	2.01639	1.20088	1.0301	0.0429391	0.0214696	0.97853
XLOC_005848	0.260123	0.21679	0.849084	0.637175	0.042982	0.978509	0.021491
XLOC_005851	0.632121	0.616942	1.28118	1.04974	0.0430157	0.978492	0.0215079
XLOC_001419	2.33736	2.71274	1.66988	1.6013	0.0430631	0.0215315	0.978468
XLOC_004344	1.14703	1.16669	0.516125	0.741786	0.0430765	0.0215382	0.978462
XLOC_005452	1.51654	1.523	0.478437	0.846394	0.0431058	0.0215529	0.978447
XLOC_005873	4.10556	4.24089	0.69967	1.92164	0.0431522	0.0215761	0.978424
XLOC_002749	0.253851	0.289325	0.787992	1.06766	0.0431705	0.978415	0.0215853
XLOC_004940	0.493057	0.526711	1.16504	1.52148	0.0431733	0.978413	0.0215866
XLOC_002618	2.17922	2.219	1.03993	1.4485	0.0432266	0.0216133	0.978387
XLOC_002682	1.2231	1.02568	0.606004	0.673306	0.0433017	0.0216509	0.978349
XLOC_005905	4.67994	6.88538	0.545454	0.735134	0.043335	0.0216675	0.978332
XLOC_001180	5.33341	7.76409	0.968339	0.823166	0.0433893	0.0216947	0.978305
XLOC_002729	2.0725	2.24223	1.25684	0.8009	0.0434574	0.0217287	0.978271
XLOC_004838	2.19114	2.87532	0.753846	0.97585	0.0434612	0.0217306	0.978269
XLOC_000602	0.657782	0.763918	0.951798	0.967693	0.0434714	0.978264	0.0217357
XLOC_002725	1.98772	2.52514	0.749539	0.20055	0.0434872	0.0217436	0.978256
XLOC_000956	0.705536	0.420933	1.20937	1.2947	0.0435043	0.978248	0.0217522
XLOC_003381	0.219901	0	1.1961	1.73959	0.0435814	0.978209	0.0217907
XLOC_001865	0.791517	0.695351	1.47706	1.23144	0.0435962	0.978202	0.0217981
XLOC_003837	0.78356	1.02879	1.58149	1.47289	0.0436019	0.978199	0.0218009
XLOC_004870	0.325881	0.281236	0.827441	0.645355	0.0438406	0.97808	0.0219203
XLOC_003938	0.594396	0.617648	1.09941	0.924967	0.0438704	0.978065	0.0219352
XLOC_001725	4.69546	5.92259	0.6996	1.9224	0.0438726	0.0219363	0.978064
XLOC_001580	3.02658	4.1148	0.368919	0.989795	0.043876	0.021938	0.978062
XLOC_000868	4.49063	6.4612	0.69682	1.03309	0.0439178	0.0219589	0.978041
XLOC_005317	2.11047	2.44523	1.17183	0.69435	0.0439357	0.0219679	0.978032
XLOC_001294	1.64444	1.64471	0.95394	0.571389	0.0439614	0.0219807	0.978019
XLOC_004232	1.38315	1.70263	0.518134	0.750123	0.0440911	0.0220456	0.977954
XLOC_004978	1.64968	1.57127	0.871458	0.470753	0.0441287	0.0220643	0.977936
XLOC_003980	0.228914	0.200797	0.682872	0.941108	0.0441967	0.977902	0.0220983
XLOC_006322	22.3662	34.5596	0.483012	0.389014	0.0442077	0.0221039	0.977896
XLOC_001289	0.538258	0.470328	1.17863	0.945476	0.044269	0.977866	0.0221345
XLOC_006451	2.04074	2.37858	1.0142	0.47134	0.0443621	0.022181	0.977819
XLOC_003443	2.6303	2.67216	0.674906	1.38137	0.0443874	0.0221937	0.977806
XLOC_001455	0.400555	0.216445	2.31285	1.61459	0.0444352	0.977782	0.0222176
XLOC_003149	0.394445	0.338825	0.936415	1.24822	0.0444712	0.977764	0.0222356
XLOC_003861	2.25363	2.67491	1.47712	1.51444	0.0445141	0.022257	0.977743
XLOC_005120	1.50171	1.84553	0.905564	0.833691	0.0445522	0.0222761	0.977724
XLOC_005835	5.02628	6.91822	0.0846635	1.37625	0.0445783	0.0222892	0.977711
XLOC_006354	0.365156	0.40341	0.902265	1.18891	0.0446301	0.977685	0.022315
XLOC_002289	0.185284	0	0.592113	0.513569	0.0446311	0.977684	0.0223156
XLOC_002690	1.74723	2.43412	0.551916	0.464286	0.0446793	0.0223396	0.97766
XLOC_002563	1.89499	1.82046	0.498903	0.982798	0.0448353	0.0224176	0.977582
XLOC_001176	0.77637	0.704049	0.997937	1.11677	0.0448877	0.977556	0.0224438
XLOC_000341	0.483437	0.456091	0.965924	1.24331	0.0449652	0.977517	0.0224826
XLOC_002218	0.672064	0.893577	1.2992	1.27944	0.0449707	0.977515	0.0224854
XLOC_004747	1.91973	2.6289	0.621333	0.685089	0.0449991	0.0224995	0.9775
XLOC_000600	2.01574	2.0081	1.53097	1.70405	0.0450019	0.022501	0.977499
XLOC_006128	0.610736	0.503115	1.182	0.978433	0.0451532	0.977423	0.0225766
XLOC_000558	1.43396	1.54122	1.24189	1.18824	0.0451627	0.0225814	0.977419
XLOC_004618	1.55213	1.92444	0.834828	0.913579	0.0452265	0.0226132	0.977387
XLOC_001705	2.40152	2.37043	1.65007	1.23549	0.0452987	0.0226494	0.977351
XLOC_005076	4.35902	5.99156	1.05698	1.55614	0.0453909	0.0226954	0.977305
XLOC_003897	1.48874	1.48512	0.763271	1.02487	0.0453938	0.0226969	0.977303
XLOC_004774	0.24089	0.136629	1.58912	1.09142	0.0454539	0.977273	0.022727
XLOC_004637	0.319382	0.271155	0.85978	1.17506	0.0454658	0.977267	0.0227329
XLOC_004639	0.267983	0.247336	2.12367	3.18186	0.0455122	0.977244	0.0227561
XLOC_004551	4.12097	5.9972	0.812757	0.815536	0.0455299	0.022765	0.977235
XLOC_003460	3.70755	5.4054	0.427822	0.810409	0.0455365	0.0227683	0.977232
XLOC_000979	1.90275	2.48457	0.717014	0.904568	0.0455418	0.0227709	0.977229
XLOC_006051	0.260712	0.208525	1.33913	1.96351	0.0455825	0.977209	0.0227913
XLOC_000873	2.69333	2.98724	1.9067	2.12326	0.0455976	0.0227988	0.977201
XLOC_003594	1.05459	1.07155	1.41865	1.29077	0.045598	0.977201	0.022799
XLOC_003857	2.86256	3.9479	0.563346	0.98474	0.0456249	0.0228125	0.977188
XLOC_005595	0.486164	0.307226	0.993627	0.846578	0.0456273	0.977186	0.0228137
XLOC_003564	1.05229	1.34999	0.350651	0.515242	0.0456886	0.0228443	0.977156
XLOC_002411	3.92199	2.90797	0.58224	1.10418	0.0458105	0.0229052	0.977095
XLOC_002953	0.691763	0.756612	0.509338	0.412016	0.0458793	0.0229397	0.97706
XLOC_001707	3.88528	5.28243	1.25053	1.51556	0.0459708	0.0229854	0.977015
XLOC_005811	2.37407	3.13255	0.820909	1.07913	0.0459777	0.0229889	0.977011
XLOC_002043	0.432557	0.479559	1.39403	1.92722	0.045986	0.977007	0.022993
XLOC_006020	7.58214	6.61098	2.82476	0.64347	0.0461605	0.0230802	0.97692
XLOC_004674	3.47832	4.11726	1.443	0.30981	0.0461684	0.0230842	0.976916
XLOC_004937	0.120962	0.172936	1.48598	1.00025	0.0462342	0.976883	0.0231171
XLOC_004949	2.0502	2.27921	1.02804	0.430628	0.0462521	0.0231261	0.976874
XLOC_003996	1.82029	1.54264	0.10551	0.623123	0.0462919	0.0231459	0.976854
XLOC_005702	0.807019	0.803513	1.86834	1.48069	0.0462985	0.976851	0.0231493
XLOC_000531	0.255272	0.346362	3.31024	2.21552	0.0463357	0.976832	0.0231678
XLOC_003530	0.26509	0.095766	0.957188	0.717801	0.0463514	0.976824	0.0231757
XLOC_000655	1.73299	2.2077	0.930942	0.787751	0.0463599	0.0231799	0.97682
XLOC_001041	0.568841	0.718899	1.17212	1.03273	0.0464272	0.976786	0.0232136
XLOC_001111	0.252748	0.374296	1.71406	1.21457	0.0464395	0.97678	0.0232197
XLOC_001862	0.165889	0.256791	0.779407	1.08947	0.0464654	0.976767	0.0232327
XLOC_000305	0.982676	0.949121	1.60644	1.97305	0.0464679	0.976766	0.023234
XLOC_005243	0.431549	0.527052	1.67661	1.24778	0.0464935	0.976753	0.0232468
XLOC_000592	1.03041	0.799638	0.360992	0.412315	0.0465793	0.0232897	0.97671
XLOC_006429	1.77176	2.10017	0.565094	0.97152	0.0465926	0.0232963	0.976704
XLOC_002912	0.323367	0.216536	0.50258	0.529871	0.0466357	0.976682	0.0233178
XLOC_006033	0.364381	0.471386	2.10937	1.49795	0.0466737	0.976663	0.0233369
XLOC_000489	3.47212	4.9807	0.67559	0.945712	0.0468212	0.0234106	0.976589
XLOC_000556	7.31688	9.49095	2.00729	3.36843	0.0468333	0.0234167	0.976583
XLOC_005755	5.50731	7.95032	0.754681	1.42174	0.0468777	0.0234388	0.976561
XLOC_004965	3.09482	4.43361	0.663248	0.847099	0.0469034	0.0234517	0.976548
XLOC_006269	3.18335	4.26752	1.25204	1.35209	0.0469393	0.0234697	0.97653
XLOC_002838	0.676569	0.575911	1.00416	0.898343	0.0469518	0.976524	0.0234759
XLOC_000915	1.56143	2.09855	0.658393	0.472486	0.0469759	0.023488	0.976512
XLOC_005199	5.57939	8.10131	0.290995	1.3048	0.0470451	0.0235226	0.976477
XLOC_004095	1.1963	1.02468	0.579466	0.702705	0.047099	0.0235495	0.97645
XLOC_002886	3.20634	4.11028	1.41018	0.644068	0.0471442	0.0235721	0.976428
XLOC_000209	0.39046	0.333685	1.01968	1.39731	0.0473057	0.976347	0.0236529
XLOC_002064	5.22643	7.7787	0.445417	0.995317	0.0473769	0.0236885	0.976312
XLOC_005912	1.94374	1.51388	0.658567	0.289367	0.0473845	0.0236922	0.976308
XLOC_006396	0.572	0.320641	1.48188	1.17302	0.0474557	0.976272	0.0237279
XLOC_000462	3.34957	5.02873	0.442817	0.503152	0.0474973	0.0237486	0.976251
XLOC_003936	1.75051	2.22532	0.404858	0.810061	0.0475028	0.0237514	0.976249
XLOC_004011	3.01757	3.60093	1.15923	1.75925	0.0475386	0.0237693	0.976231
XLOC_001049	2.03126	1.98296	0.669888	1.1613	0.047543	0.0237715	0.976228
XLOC_005132	2.54853	3.26275	0.877443	1.28928	0.0475526	0.0237763	0.976224
XLOC_002049	2.92325	2.79985	1.56419	0.818446	0.0475793	0.0237896	0.97621
XLOC_004044	0.87828	0.676417	1.48026	1.8197	0.0475796	0.97621	0.0237898
XLOC_004279	0.65864	0.550268	0.899654	0.845196	0.0475872	0.976206	0.0237936
XLOC_001312	2.80933	3.94172	0.91819	0.495043	0.0476537	0.0238269	0.976173
XLOC_001910	1.74241	1.97212	1.02959	0.621531	0.0478373	0.0239186	0.976081
XLOC_000009	1.79915	2.58105	0.500389	0.415634	0.0478729	0.0239364	0.976064
XLOC_002032	0.261042	0.227162	0.850959	1.20555	0.0479092	0.976045	0.0239546
XLOC_006338	2.27974	2.76906	1.37672	1.47487	0.0479145	0.0239573	0.976043
XLOC_003121	0.358806	0.506971	1.25536	1.70836	0.047932	0.976034	0.023966
XLOC_003871	2.05596	2.53656	1.09623	0.670104	0.0479653	0.0239826	0.976017
XLOC_000951	2.27331	2.76335	1.18773	1.43479	0.0479889	0.0239945	0.976006
XLOC_000468	1.59806	2.24052	0.475371	0.527855	0.047994	0.023997	0.976003
XLOC_004350	3.9781	3.05232	0.54214	1.2807	0.0480239	0.024012	0.975988
XLOC_004418	4.38284	6.0885	1.58019	1.26652	0.0480385	0.0240193	0.975981
XLOC_003867	0.26887	0.126807	1.7247	1.17322	0.0480902	0.975955	0.0240451
XLOC_002346	4.96425	7.37794	0.930911	0.790221	0.0481115	0.0240557	0.975944
XLOC_000291	0.319426	0.353743	2.25572	1.54372	0.048257	0.975871	0.0241285
XLOC_000712	1.94196	2.53463	0.883278	0.967915	0.0482668	0.0241334	0.975867
XLOC_002050	4.32191	6.25488	1.10492	0.984678	0.0483277	0.0241638	0.975836
XLOC_001593	0.535224	0.212203	1.18752	1.48646	0.0484306	0.975785	0.0242153
XLOC_002637	1.71789	1.61976	1.411	1.45547	0.0485107	0.0242554	0.975745
XLOC_000497	1.00923	0.912223	3.26098	4.62064	0.0485297	0.975735	0.0242648
XLOC_006433	0.981709	0.898935	0.522905	0.293809	0.0486283	0.0243141	0.975686
XLOC_002409	1.74256	1.96501	0.715885	1.09038	0.0486818	0.0243409	0.975659
XLOC_000665	3.75993	5.27681	1.29363	1.02324	0.0487604	0.0243802	0.97562
XLOC_001867	0.556029	0.542665	1.24712	0.987001	0.0488035	0.975598	0.0244018
XLOC_004914	5.42251	8.39294	0.291785	0.534899	0.0488263	0.0244131	0.975587
XLOC_004572	4.4717	6.3083	1.48655	1.18594	0.0488617	0.0244309	0.975569
XLOC_002433	3.36784	4.66428	1.00653	1.26936	0.0489641	0.024482	0.975518
XLOC_002264	2.94528	3.81806	0.57805	1.28849	0.0489703	0.0244851	0.975515
XLOC_005027	0.487397	0.379992	1.64263	1.20125	0.0489748	0.975513	0.0244874
XLOC_003983	1.05079	1.03317	0.801698	0.659592	0.0490276	0.0245138	0.975486
XLOC_005455	2.68076	2.81238	1.82851	1.30075	0.0490814	0.0245407	0.975459
XLOC_003099	1.64667	1.40374	0.677749	0.254336	0.049216	0.024608	0.975392
XLOC_000264	0.441005	0.291609	0.994787	0.800609	0.0492494	0.975375	0.0246247
XLOC_004460	1.53908	1.58881	0.58429	0	0.0492554	0.0246277	0.975372
XLOC_003672	1.77542	2.05785	0.380844	0.897945	0.0493001	0.02465	0.97535
XLOC_000864	2.45738	3.59146	0.53553	0.593188	0.0493563	0.0246781	0.975322
XLOC_000954	2.96074	3.85861	0.680505	1.33291	0.0494126	0.0247063	0.975294
XLOC_002489	0.589316	0.802849	2.2591	1.70454	0.0494737	0.975263	0.0247368
XLOC_003477	0.313499	0.456117	0.721187	0.833348	0.0494993	0.97525	0.0247497
XLOC_006417	4.55432	5.30771	2.41266	1.17138	0.0495513	0.0247756	0.975224
XLOC_002307	0.261589	0.320216	0.825507	1.14028	0.0495766	0.975212	0.0247883
XLOC_001532	3.09768	4.01408	0.822806	1.46298	0.0496891	0.0248446	0.975155
XLOC_006096	7.65702	11.7155	0.846903	1.00067	0.0497358	0.0248679	0.975132
XLOC_004603	1.44167	1.6647	0.902601	0.607372	0.049745	0.0248725	0.975127
XLOC_005146	1.95265	1.99233	0.95105	0.335973	0.0497914	0.0248957	0.975104
XLOC_006227	1.86963	2.40849	0.81272	0.321429	0.0498097	0.0249048	0.975095
XLOC_005879	1.81098	2.26374	0.371485	0.854186	0.049951	0.0249755	0.975025
XLOC_001249	1.94802	1.70734	0.90869	1.18136	0.0499733	0.0249867	0.975013
XLOC_002276	5.35158	3.81161	1.07753	1.35462	0.0500184	0.0250092	0.974991
XLOC_000277	0.763881	0.573533	1.06735	1.12573	0.0501083	0.974946	0.0250541
XLOC_000275	0.462194	0.454772	1.30239	0.983672	0.0501763	0.974912	0.0250882
XLOC_001429	1.18496	1.08443	0.864887	0.917662	0.050321	0.0251605	0.97484
XLOC_003290	2.54778	2.9008	1.28824	0.514757	0.0503229	0.0251614	0.974839
XLOC_001936	2.90179	4.05837	0.612997	1.04888	0.0503452	0.0251726	0.974827
XLOC_002451	2.23147	2.92186	0.910728	1.13332	0.0503518	0.0251759	0.974824
XLOC_004935	0.388529	0.310426	1.5488	1.10044	0.0503762	0.974812	0.0251881
XLOC_003526	0.547705	0.667915	1.73011	1.31939	0.0503777	0.974811	0.0251888
XLOC_001608	2.63237	4.01779	0.396151	0.30411	0.0503779	0.0251889	0.974811
XLOC_004300	6.55398	10.0493	0.940245	0.630642	0.0504043	0.0252021	0.974798
XLOC_005451	4.77117	7.15348	0.781686	0.921169	0.0504175	0.0252088	0.974791
XLOC_003338	2.23877	2.30192	0.54787	1.19747	0.0504256	0.0252128	0.974787
XLOC_002544	1.98857	1.6996	1.15095	0.899404	0.0506005	0.0253002	0.9747
XLOC_005504	2.94117	3.79877	0.708535	1.37986	0.050689	0.0253445	0.974656
XLOC_001126	2.13849	3.15256	0.34534	0.5393	0.0507563	0.0253782	0.974622
XLOC_001523	1.68507	1.75775	1.5685	1.53789	0.0508043	0.0254022	0.974598
XLOC_000917	1.09155	1.29733	0.583196	0.29463	0.0508561	0.025428	0.974572
XLOC_005033	2.79625	2.91188	1.35151	0.438483	0.0509892	0.0254946	0.974505
XLOC_001964	2.05964	2.5174	0.769545	0	0.0511016	0.0255508	0.974449
XLOC_004924	3.47869	4.89636	1.00301	1.25285	0.0511333	0.0255667	0.974433
XLOC_002331	1.52131	1.95153	0.815009	0.584343	0.0512072	0.0256036	0.974396
XLOC_005681	2.7565	3.4767	0.999771	0	0.0512116	0.0256058	0.974394
XLOC_003339	2.56823	2.89111	0.698643	1.41675	0.051218	0.025609	0.974391
XLOC_002557	3.18206	2.40033	0.984385	0.364938	0.0512843	0.0256422	0.974358
XLOC_002006	1.62864	1.59746	1.09778	0.782103	0.0512894	0.0256447	0.974355
XLOC_000200	0.297688	0.270967	0.698839	0.952671	0.0513176	0.974341	0.0256588
XLOC_003903	1.41596	1.66667	1.02167	0.932569	0.0513545	0.0256773	0.974323
XLOC_004874	0.323123	0.287315	1.18978	0.853684	0.0513809	0.97431	0.0256905
XLOC_003150	1.84473	1.82949	1.16352	0.748059	0.0513811	0.0256906	0.974309
XLOC_002546	2.31735	3.30668	0.738435	0.694886	0.0515593	0.0257797	0.97422
XLOC_005576	0.733378	0.713191	1.26258	1.59587	0.0516351	0.974182	0.0258175
XLOC_001364	3.44278	4.84236	1.25378	0.76543	0.0516665	0.0258333	0.974167
XLOC_005165	2.13231	2.74657	0.658372	1.07844	0.0517743	0.0258872	0.974113
XLOC_003088	0.355601	0.278906	1.17433	1.69924	0.0518091	0.974095	0.0259046
XLOC_000418	2.02892	2.75231	0.743818	0.907324	0.0518142	0.0259071	0.974093
XLOC_000417	1.92146	1.99972	1.24344	1.50912	0.0518411	0.0259205	0.974079
XLOC_003697	3.38964	4.91478	0.62998	1.02749	0.0518866	0.0259433	0.974057
XLOC_004675	2.21732	3.17642	0.713295	0.339593	0.0518921	0.0259461	0.974054
XLOC_001569	3.03839	4.23598	1.05494	0.342074	0.0518926	0.0259463	0.974054
XLOC_002720	2.64414	3.38089	1.36408	0.831219	0.0520107	0.0260053	0.973995
XLOC_004927	3.06469	4.62003	0.617974	0.497849	0.0520336	0.0260168	0.973983
XLOC_003777	1.92705	2.19516	1.28777	1.46995	0.0520662	0.0260331	0.973967
XLOC_005824	1.55789	1.78994	0.740854	1.03384	0.0520748	0.0260374	0.973963
XLOC_006215	1.96897	2.35374	1.17125	1.35589	0.0521164	0.0260582	0.973942
XLOC_000131	1.47898	1.34161	1.08542	0.964035	0.0521276	0.0260638	0.973936
XLOC_006455	3.16923	3.26066	1.59092	0.581064	0.0523028	0.0261514	0.973849
XLOC_003880	8.44297	13.2621	0.77146	0.697209	0.0523142	0.0261571	0.973843
XLOC_003677	2.44194	2.87858	0.94692	1.48033	0.0523465	0.0261733	0.973827
XLOC_000891	0.508301	0.576018	1.20765	1.61686	0.0523874	0.973806	0.0261937
XLOC_004833	0.558418	0.583042	2.17285	1.55614	0.0524587	0.973771	0.0262294
XLOC_006047	1.38744	1.56019	0.922696	1.07097	0.0525066	0.0262533	0.973747
XLOC_002343	0.125117	0.174461	2.43801	1.5569	0.0525744	0.973713	0.0262872
XLOC_005302	0.838509	1.2269	2.05526	2.50833	0.0526	0.9737	0.0263
XLOC_004734	0.391644	0.420746	0.798064	0.649164	0.0526449	0.973678	0.0263225
XLOC_005108	2.45219	3.02161	1.52213	1.56343	0.0526714	0.0263357	0.973664
XLOC_005352	0.46913	0.377358	1.07495	1.47072	0.0526901	0.973655	0.0263451
XLOC_004094	2.02672	2.54653	0.52954	1.02941	0.0527503	0.0263751	0.973625
XLOC_000775	4.17239	6.23601	0.588273	1.01675	0.0528181	0.026409	0.973591
XLOC_004170	0.82202	0.748235	1.12271	1.31758	0.0528523	0.973574	0.0264261
XLOC_003533	1.81917	2.41556	0.862008	0.882137	0.0528914	0.0264457	0.973554
XLOC_005229	2.83129	3.94737	1.06739	0.513699	0.0529366	0.0264683	0.973532
XLOC_004258	1.26034	1.29256	0.99465	0.820788	0.052965	0.0264825	0.973517
XLOC_001057	2.52067	3.03294	1.51108	0.987097	0.0529883	0.0264941	0.973506
XLOC_004480	3.08144	3.70807	0.952218	1.71672	0.0530136	0.0265068	0.973493
XLOC_000995	2.20637	2.89313	1.16018	0.997244	0.0530193	0.0265097	0.97349
XLOC_000793	1.34554	1.45482	2.2267	1.92212	0.0530441	0.973478	0.0265221
XLOC_001079	2.10214	2.88353	0.888573	0.832852	0.0530513	0.0265257	0.973474
XLOC_002063	1.65935	2.27891	0.582241	0.715524	0.0530602	0.0265301	0.97347
XLOC_003736	0.739792	0.773834	0.236048	0.435323	0.0530676	0.0265338	0.973466
XLOC_000537	0.761349	0.496	1.32278	1.63239	0.0531256	0.973437	0.0265628
XLOC_000539	0.317822	0.343805	1.01591	0.751585	0.0531269	0.973437	0.0265634
XLOC_001433	0.912202	0.836384	1.69205	1.38266	0.053144	0.973428	0.026572
XLOC_002135	2.81024	3.29406	1.39698	0.51216	0.0532151	0.0266075	0.973392
XLOC_004730	3.70822	5.43319	0.905652	1.03879	0.0532174	0.0266087	0.973391
XLOC_001369	0.379538	0.233987	1.146	1.65072	0.0533032	0.973348	0.0266516
XLOC_005626	1.91136	2.11178	1.5599	1.6075	0.0533512	0.0266756	0.973324
XLOC_005453	2.00463	2.77137	0.82223	0.498281	0.0534167	0.0267083	0.973292
XLOC_001733	0.534419	0.539863	1.49819	2.10842	0.0534586	0.973271	0.0267293
XLOC_005843	0.251001	0.11492	1.65669	1.09724	0.0535089	0.973246	0.0267544
XLOC_004012	0.450879	0.473304	0.912566	0.738647	0.0535468	0.973227	0.0267734
XLOC_005235	0.79639	1.01071	1.46378	1.34951	0.053627	0.973186	0.0268135
XLOC_003465	0.467717	0.338633	1.3378	0.992946	0.0536923	0.973154	0.0268461
XLOC_001940	2.13759	2.19272	1.32951	0.800734	0.0537303	0.0268652	0.973135
XLOC_002376	0.812563	0.945387	1.17834	1.28534	0.0537433	0.973128	0.0268717
XLOC_001908	1.63129	1.92151	0.502925	0.926417	0.0537816	0.0268908	0.973109
XLOC_002237	0.262843	0.2223	1.04819	0.736595	0.0537829	0.973109	0.0268914
XLOC_003976	0.348527	0.305379	1.29348	0.919012	0.0538139	0.973093	0.026907
XLOC_006147	0.421513	0.393947	3.11548	2.06006	0.053935	0.973033	0.0269675
XLOC_003995	1.72477	1.45732	0.536861	0.872743	0.053971	0.0269855	0.973014
XLOC_003591	0.312839	0.305645	1.08774	0.78412	0.0540022	0.972999	0.0270011
XLOC_000852	0.376163	0.343726	0.597346	0.744569	0.0540225	0.972989	0.0270112
XLOC_002541	1.92975	2.29769	1.37652	1.26683	0.0540301	0.027015	0.972985
XLOC_001270	1.15505	1.13294	0.391525	0.684537	0.0540644	0.0270322	0.972968
XLOC_000168	4.68977	7.37222	0.50568	0.500238	0.0541305	0.0270653	0.972935
XLOC_004327	0.411866	0.526465	0.811785	0.986096	0.0541596	0.97292	0.0270798
XLOC_005902	2.22095	2.01516	1.43597	1.06979	0.0541839	0.027092	0.972908
XLOC_003712	3.17054	3.28239	0.405549	1.50338	0.0542241	0.027112	0.972888
XLOC_002903	2.63762	3.42642	1.18026	0.445034	0.0542569	0.0271285	0.972872
XLOC_006160	4.84694	7.51262	0.812584	0.499351	0.0542649	0.0271325	0.972868
XLOC_000877	2.12352	2.79853	1.11514	0.963206	0.0544121	0.027206	0.972794
XLOC_001089	0.475161	0.331866	2.08944	1.44213	0.0544243	0.972788	0.0272121
XLOC_004474	1.93764	2.37254	1.19853	1.28746	0.0544264	0.0272132	0.972787
XLOC_003350	1.3496	1.5455	0.798546	0.448641	0.0544275	0.0272137	0.972786
XLOC_004983	3.07664	3.88413	1.68168	1.03952	0.0544294	0.0272147	0.972785
XLOC_002337	2.86031	2.87038	1.21826	0.158404	0.0544625	0.0272312	0.972769
XLOC_002956	0.346415	0.46999	1.25836	0.944309	0.0544714	0.972764	0.0272357
XLOC_003700	3.85501	4.85595	1.98736	1.02517	0.0545516	0.0272758	0.972724
XLOC_005864	0.618679	0.695683	0.829027	0.810373	0.0545993	0.9727	0.0272997
XLOC_003830	1.91005	2.02251	1.34054	0.958532	0.0546072	0.0273036	0.972696
XLOC_002144	3.17627	2.15279	0.595735	0.526847	0.0546395	0.0273198	0.97268
XLOC_004825	2.60752	2.24349	1.38705	0.869039	0.0546922	0.0273461	0.972654
XLOC_002249	1.57244	1.469	0.811769	0.369492	0.0547699	0.027385	0.972615
XLOC_003562	1.99838	2.4115	0.703159	1.1665	0.0548513	0.0274257	0.972574
XLOC_003879	0.997268	0.815543	1.44746	1.3063	0.0549257	0.972537	0.0274629
XLOC_004863	1.74786	2.05724	1.15335	0.833417	0.055011	0.0275055	0.972495
XLOC_000356	2.46381	3.59103	0.629038	0.782985	0.0551269	0.0275635	0.972437
XLOC_002648	0.807936	0.706102	1.13016	1.34162	0.0551321	0.972434	0.0275661
XLOC_002217	0.371675	0.219123	0.639582	0.596595	0.0553508	0.972325	0.0276754
XLOC_005458	2.46098	2.42832	1.08799	0.205459	0.0553573	0.0276786	0.972321
XLOC_005722	2.47999	2.21658	1.05936	0.276605	0.0554224	0.0277112	0.972289
XLOC_006292	1.19475	1.26943	1.04922	0.968785	0.0555139	0.0277569	0.972243
XLOC_000433	2.52939	3.62369	0.77884	0.899431	0.0555356	0.0277678	0.972232
XLOC_001256	0.163333	0.135575	1.7688	1.12917	0.0556624	0.972169	0.0278312
XLOC_001851	0.256835	0.199815	0.728408	1.04936	0.0558317	0.972084	0.0279158
XLOC_005699	1.69693	1.39753	0.9458	0.801231	0.0558334	0.0279167	0.972083
XLOC_004952	4.76133	7.19333	0.710837	1.19536	0.0558489	0.0279245	0.972076
XLOC_000774	2.46674	3.39484	1.09183	0.721849	0.0558664	0.0279332	0.972067
XLOC_002175	5.13544	6.05343	2.05957	0	0.0559368	0.0279684	0.972032
XLOC_002860	1.48024	1.98733	0.736093	0.561476	0.056	0.028	0.972
XLOC_005536	2.84961	4.16005	0.700817	0.929692	0.056065	0.0280325	0.971968
XLOC_006287	1.92746	2.42125	1.06507	0.632821	0.0561745	0.0280873	0.971913
XLOC_006233	0.274378	0.281297	0.867212	1.25497	0.0561763	0.971912	0.0280882
XLOC_001435	1.51856	1.47256	1.19352	1.00198	0.0561857	0.0280928	0.971907
XLOC_004462	0.648997	0.621508	1.43481	1.11824	0.0562547	0.971873	0.0281274
XLOC_000390	1.75766	1.92849	1.28493	0.975607	0.0563002	0.0281501	0.97185
XLOC_005094	1.26507	1.59367	0.610789	0.772026	0.056355	0.0281775	0.971822
XLOC_000093	3.09132	2.09916	0.623767	0.557284	0.0563605	0.0281802	0.97182
XLOC_005623	0.714204	0.627631	2.30535	1.6602	0.0563959	0.971802	0.0281979
XLOC_005716	0.598619	0.706911	0.892192	0.983048	0.0564059	0.971797	0.0282029
XLOC_002342	2.90493	2.60114	1.48785	1.91325	0.056496	0.028248	0.971752
XLOC_000833	0.690699	0.886073	1.19769	1.33069	0.0565096	0.971745	0.0282548
XLOC_003449	0.899577	0.877201	1.19575	1.39728	0.056527	0.971737	0.0282635
XLOC_002624	1.42621	1.6027	1.14617	1.0282	0.0565326	0.0282663	0.971734
XLOC_003208	0.619187	0.643704	0.919363	1.10761	0.0565448	0.971728	0.0282724
XLOC_000730	0.297604	0.250577	0.762328	1.08057	0.0565498	0.971725	0.0282749
XLOC_002107	1.71741	1.79908	1.18356	1.40048	0.0565951	0.0282976	0.971702
XLOC_001119	0.476183	0.343954	0.925952	1.23208	0.0568747	0.971563	0.0284374
XLOC_001091	2.17617	2.91934	1.02905	1.07863	0.0568917	0.0284458	0.971554
XLOC_004981	0.320009	0.322554	0.924047	1.32463	0.0569475	0.971526	0.0284737
XLOC_004473	0.148207	0.223295	1.46287	0.95738	0.0569558	0.971522	0.0284779
XLOC_000501	0.551157	0.408167	0.910089	1.14245	0.0570104	0.971495	0.0285052
XLOC_002655	1.64533	2.0788	0.634683	0.948033	0.057096	0.028548	0.971452
XLOC_005615	1.80704	2.08586	0.473158	1.00814	0.0572567	0.0286283	0.971372
XLOC_001254	0.568006	0.512932	1.00683	1.31143	0.0572617	0.971369	0.0286308
XLOC_001702	0.450968	0.369253	1.94162	1.33301	0.0572707	0.971365	0.0286354
XLOC_003401	2.16093	2.2478	0.31212	1.06562	0.0572933	0.0286466	0.971353
XLOC_006124	1.52966	1.71292	0.96924	0.589484	0.0573648	0.0286824	0.971318
XLOC_002556	1.69967	1.72285	1.01148	0.544577	0.0573834	0.0286917	0.971308
XLOC_004933	0.449456	0.572771	0.867597	1.05704	0.057395	0.971302	0.0286975
XLOC_002794	1.87096	2.41915	0.727324	1.04127	0.0574131	0.0287066	0.971293
XLOC_005550	2.24128	2.85442	1.12556	1.35628	0.0574541	0.0287271	0.971273
XLOC_005164	0.46162	0.310691	1.45111	1.04582	0.0575141	0.971243	0.028757
XLOC_002631	2.37656	2.52757	1.25058	0.465458	0.0575177	0.0287588	0.971241
XLOC_002982	1.82968	2.34418	1.09006	0.905748	0.0575777	0.0287888	0.971211
XLOC_000388	1.68958	1.93586	0.965033	1.22715	0.0575861	0.028793	0.971207
XLOC_005385	3.67772	5.67399	0.792932	0	0.0575973	0.0287986	0.971201
XLOC_002528	5.1203	7.90896	0.780429	1.07772	0.0576301	0.028815	0.971185
XLOC_001503	0.663772	0.64854	0.953142	1.15165	0.0577047	0.971148	0.0288523
XLOC_002950	1.27946	1.13452	0.921148	0.915655	0.0577351	0.0288676	0.971132
XLOC_003560	3.92516	4.72753	1.7603	0.313154	0.0578218	0.0289109	0.971089
XLOC_000798	1.53421	1.44072	0.709494	1.01088	0.0578334	0.0289167	0.971083
XLOC_001924	1.81405	2.0533	0.747412	0	0.0578353	0.0289177	0.971082
XLOC_000420	1.39569	1.50015	1.09902	0.898189	0.0579925	0.0289963	0.971004
XLOC_002551	2.78987	3.92981	0.837136	1.17073	0.0580643	0.0290322	0.970968
XLOC_005126	5.76164	8.73582	1.41269	1.27537	0.0580803	0.0290401	0.97096
XLOC_000772	1.76027	2.17308	0.869194	1.12933	0.0581091	0.0290545	0.970945
XLOC_005476	26.6299	43.6962	0.692014	1.83637	0.0581535	0.0290767	0.970923
XLOC_000307	0.558583	0.562207	2.31536	1.60806	0.0581882	0.970906	0.0290941
XLOC_005080	3.96649	5.47577	1.03814	1.76733	0.058268	0.029134	0.970866
XLOC_000650	1.50139	1.60206	0.809312	0.320823	0.0583471	0.0291736	0.970826
XLOC_005058	0.914051	0.788899	0.523109	0.356975	0.0583572	0.0291786	0.970821
XLOC_005777	1.40925	1.3827	0.677225	0.966353	0.0583823	0.0291911	0.970809
XLOC_006481	0.815355	0.859289	0.687726	0.600439	0.0583883	0.0291942	0.970806
XLOC_000234	1.40486	1.70586	0.875455	0.978063	0.0584339	0.0292169	0.970783
XLOC_003312	2.89266	4.32391	0.73295	0.818764	0.058499	0.0292495	0.97075
XLOC_004284	0.852447	0.769237	0.97007	0.997917	0.0586125	0.970694	0.0293062
XLOC_003038	2.57075	1.81529	0.589445	0.749364	0.0586269	0.0293134	0.970687
XLOC_001213	0.6192	0.377213	1.13102	0.983525	0.058645	0.970678	0.0293225
XLOC_003873	3.62369	5.12023	1.22949	1.51081	0.0587227	0.0293614	0.970639
XLOC_002422	0.925593	0.802583	1.14777	1.10018	0.0587714	0.970614	0.0293857
XLOC_005018	1.6954	1.96401	0.929311	0.403517	0.0587814	0.0293907	0.970609
XLOC_002945	0.483799	0.513079	1.57181	1.13798	0.0588114	0.970594	0.0294057
XLOC_003464	2.72805	2.41086	1.09295	1.62069	0.0588249	0.0294124	0.970588
XLOC_004882	0.828454	0.605454	1.17748	1.33815	0.0589145	0.970543	0.0294573
XLOC_005663	0.292135	0.541185	1.06505	0.91412	0.0589385	0.970531	0.0294693
XLOC_004412	3.03682	4.24801	0.615626	1.2641	0.0589513	0.0294757	0.970524
XLOC_001487	2.57277	3.69487	0.943926	0.365053	0.0591428	0.0295714	0.970429
XLOC_004596	2.45269	2.84411	1.6467	1.14062	0.0592781	0.029639	0.970361
XLOC_006366	0.209029	0.16087	0.711564	1.06769	0.0592944	0.970353	0.0296472
XLOC_005367	0.665015	0.416136	1.32488	1.09193	0.0593948	0.970303	0.0296974
XLOC_001411	10.6547	17.2724	0.966016	1.03704	0.0594219	0.029711	0.970289
XLOC_005788	0.573074	0.489866	1.26474	0.975818	0.0594348	0.970283	0.0297174
XLOC_002484	0.861617	0.830129	0.454715	0.188496	0.0595829	0.0297915	0.970209
XLOC_002375	1.12218	1.37475	0.758148	0.751224	0.0596615	0.0298307	0.970169
XLOC_003236	1.57326	1.24937	0.366968	0.684087	0.0596683	0.0298341	0.970166
XLOC_005111	0.390595	0.468439	1.79843	2.73642	0.059749	0.970126	0.0298745
XLOC_000585	1.00119	0.902042	1.76593	1.44572	0.0598069	0.970097	0.0299034
XLOC_004360	0.306362	0.0688938	1.59398	1.0605	0.0598132	0.970093	0.0299066
XLOC_005826	2.00352	2.92951	0.719552	0.450987	0.0598334	0.0299167	0.970083
XLOC_006120	0.308689	0.250698	2.32845	1.49397	0.0598756	0.970062	0.0299378
XLOC_003644	0.608847	0.656576	0.895871	0.797127	0.059939	0.97003	0.0299695
XLOC_002000	2.19712	3.15852	0.862314	0.6883	0.0600538	0.0300269	0.969973
XLOC_005834	5.22025	8.11051	0.805937	1.17941	0.0600957	0.0300479	0.969952
XLOC_001274	2.05338	2.79251	0.747244	1.027	0.0602756	0.0301378	0.969862
XLOC_000201	1.17878	1.27321	0.873919	0.991626	0.0602862	0.0301431	0.969857
XLOC_006266	1.81387	1.75781	1.35235	1.05873	0.0603917	0.0301959	0.969804
XLOC_000825	0.68307	0.659795	1.41289	1.10987	0.0603978	0.969801	0.0301989
XLOC_001415	1.43287	1.2489	0.942246	0.774774	0.0605247	0.0302623	0.969738
XLOC_005050	0.155818	0.158681	2.08709	1.29576	0.0605366	0.969732	0.0302683
XLOC_002482	0.3914	0.453519	1.35806	0.978394	0.0605495	0.969725	0.0302747
XLOC_005911	0.428747	0.180761	0.824892	0.769574	0.0605621	0.969719	0.0302811
XLOC_003863	2.28894	2.57502	1.16135	0.343235	0.0605744	0.0302872	0.969713
XLOC_002265	1.27472	1.63578	0.717625	0.449233	0.0605854	0.0302927	0.969707
XLOC_001681	0.911511	1.14988	2.3551	1.85425	0.0606802	0.96966	0.0303401
XLOC_002015	1.88253	2.62427	0.766249	0.256933	0.0607003	0.0303501	0.96965
XLOC_004740	1.34081	1.74294	0.632623	0.786103	0.0607958	0.0303979	0.969602
XLOC_003771	0.644076	0.596845	1.26493	1.71095	0.0607981	0.969601	0.030399
XLOC_002426	0.23517	0.417284	0.982187	0.765283	0.0608538	0.969573	0.0304269
XLOC_005363	1.34641	1.61874	0.539418	0.844767	0.0609187	0.0304593	0.969541
XLOC_005604	0.545934	0.498244	2.10158	1.45345	0.0609323	0.969534	0.0304661
XLOC_001923	0.720415	0.696884	1.02664	0.897523	0.0609756	0.969512	0.0304878
XLOC_000430	11.0744	18.1345	0.929791	1.01206	0.0609814	0.0304907	0.969509
XLOC_003660	0.217547	0.227576	0.887976	1.35301	0.0610098	0.969495	0.0305049
XLOC_004421	6.6496	4.54624	0.858002	1.65681	0.0610835	0.0305418	0.969458
XLOC_001982	1.16265	1.49186	0.674636	0.455437	0.0611983	0.0305992	0.969401
XLOC_003411	0.659857	0.482908	0.956731	1.12375	0.0612155	0.969392	0.0306078
XLOC_000840	0.382005	0.390886	0.754005	0.6025	0.0614547	0.969273	0.0307274
XLOC_004809	4.16923	6.38586	0.847988	1.11955	0.0614582	0.0307291	0.969271
XLOC_000088	0.284289	0.222032	0.754838	0.555286	0.0614627	0.969269	0.0307314
XLOC_001852	2.66442	3.86065	0.478078	1.01122	0.0614671	0.0307335	0.969266
XLOC_006288	0.909587	0.830898	0.719944	0.677487	0.0617104	0.0308552	0.969145
XLOC_000096	0.620078	0.634626	0.451602	0.328719	0.0617997	0.0308999	0.9691
XLOC_000166	0.698607	0.707721	0.441567	0.25715	0.0618395	0.0309198	0.96908
XLOC_001283	1.63359	2.21329	0.666007	0.114122	0.0618625	0.0309312	0.969069
XLOC_005551	3.70445	5.33847	1.41068	0.538086	0.061918	0.030959	0.969041
XLOC_005390	7.41488	12.0002	0.681965	1.11139	0.0620162	0.0310081	0.968992
XLOC_003758	1.33955	1.61964	0.734376	0.926207	0.0620505	0.0310253	0.968975
XLOC_001260	0.209831	0.250985	0.791511	1.18592	0.0620705	0.968965	0.0310353
XLOC_002812	3.22556	3.21855	1.78972	0.775519	0.0620711	0.0310355	0.968964
XLOC_001305	2.0735	2.68792	1.00124	0.357481	0.0620947	0.0310473	0.968953
XLOC_003870	2.48365	3.27571	1.39915	1.04274	0.0622171	0.0311085	0.968891
XLOC_006424	1.34996	1.60933	0.886316	0.601361	0.0622277	0.0311138	0.968886
XLOC_002297	3.91469	6.22744	0.353932	0.80277	0.0623805	0.0311902	0.96881
XLOC_000943	0.336226	0.39414	2.27637	1.48398	0.0623898	0.968805	0.0311949
XLOC_004522	8.78451	14.6709	0.629881	0.363799	0.0624412	0.0312206	0.968779
XLOC_001350	1.37444	1.68897	0.93259	0.755095	0.062522	0.031261	0.968739
XLOC_005475	4.64344	2.91694	0.498159	0.487079	0.0625514	0.0312757	0.968724
XLOC_001160	6.78284	10.6522	0.620252	1.60912	0.0625773	0.0312886	0.968711
XLOC_003735	0.274815	0.284659	0.522465	0.695041	0.0625951	0.968702	0.0312975
XLOC_004065	2.72738	4.19882	0.726356	0.579214	0.0627734	0.0313867	0.968613
XLOC_002299	0.202115	0.213532	0.525087	0.393299	0.0627833	0.968608	0.0313916
XLOC_004764	0.461477	0.414268	1.77048	1.21685	0.0627919	0.968604	0.031396
XLOC_003842	3.90347	5.71943	1.45248	1.20628	0.0627931	0.0313966	0.968603
XLOC_005980	3.83527	2.82116	0.824967	1.4007	0.0628142	0.0314071	0.968593
XLOC_003626	0.358951	0.370469	0.619264	0.513676	0.062826	0.968587	0.031413
XLOC_004954	23.424	39.673	0.358142	0.986188	0.062872	0.031436	0.968564
XLOC_003625	1.60946	2.23248	0.651931	0.146756	0.0629747	0.0314873	0.968513
XLOC_006088	2.14262	3.05866	0.778017	0.912592	0.0630479	0.0315239	0.968476
XLOC_005034	1.54538	1.78762	1.0429	0.700654	0.0630775	0.0315388	0.968461
XLOC_006108	0.476192	0.415723	1.46219	2.1871	0.0630826	0.968459	0.0315413
XLOC_002787	2.44632	3.67826	0.720507	0.734502	0.0630946	0.0315473	0.968453
XLOC_004230	5.32267	3.6182	0.910231	1.35598	0.0631439	0.031572	0.968428
XLOC_000579	0.56925	0.521445	1.36746	1.02658	0.0632087	0.968396	0.0316043
XLOC_002966	0.538238	0.65949	1.29572	1.77605	0.0633133	0.968343	0.0316567
XLOC_005649	2.26904	2.5791	0.276423	1.13195	0.0634023	0.0317011	0.968299
XLOC_002746	3.08409	2.79626	0.267588	1.35633	0.0634137	0.0317068	0.968293
XLOC_001732	0.300179	0.310169	1.45412	0.973272	0.0634641	0.968268	0.031732
XLOC_006197	1.29377	1.14148	0.86284	0.683141	0.0635468	0.0317734	0.968227
XLOC_001642	0.308079	0.203985	0.831627	1.22847	0.0636105	0.968195	0.0318052
XLOC_006381	1.23773	1.14393	1.01812	0.976328	0.0636858	0.0318429	0.968157
XLOC_006403	5.82879	9.53354	0.764222	0.622521	0.0637213	0.0318606	0.968139
XLOC_003244	1.88535	2.64133	0.887012	0.73506	0.0638052	0.0319026	0.968097
XLOC_001660	1.54802	1.75169	1.11597	1.25533	0.0639569	0.0319785	0.968022
XLOC_004777	0.734643	0.72379	1.30401	1.06272	0.0640034	0.967998	0.0320017
XLOC_002993	0.457538	0.215282	0.79288	0.790041	0.0641239	0.967938	0.0320619
XLOC_000591	1.23552	1.07753	0.502652	0.739847	0.0641283	0.0320641	0.967936
XLOC_000332	0.788074	0.821682	2.4013	1.73065	0.0641349	0.967933	0.0320674
XLOC_003674	1.5875	1.75337	1.01543	0.581885	0.0641382	0.0320691	0.967931
XLOC_000174	1.94617	2.13127	1.55766	1.28627	0.0641726	0.0320863	0.967914
XLOC_000488	0.879127	0.587809	1.26631	1.39599	0.0643675	0.967816	0.0321837
XLOC_001658	1.02363	1.01166	0.94369	0.89171	0.0644091	0.0322045	0.967795
XLOC_001063	1.24647	1.40387	1.03916	1.01395	0.0644265	0.0322132	0.967787
XLOC_005577	2.43407	2.6271	1.30511	0.441335	0.0644774	0.0322387	0.967761
XLOC_002388	0.208525	0.137505	1.91015	1.18068	0.0644806	0.96776	0.0322403
XLOC_005189	1.42464	1.5541	1.04284	0.755331	0.0645086	0.0322543	0.967746
XLOC_003379	0.386533	0.195953	1.30309	0.91089	0.064591	0.967705	0.0322955
XLOC_002367	1.58016	1.62715	0.910546	0.407656	0.0646308	0.0323154	0.967685
XLOC_003809	1.37073	1.65112	0.890974	0.588595	0.0646365	0.0323182	0.967682
XLOC_003519	1.59044	1.38303	0.888293	0.526588	0.0646992	0.0323496	0.96765
XLOC_001043	1.57921	1.41099	1.00557	1.15186	0.0647773	0.0323887	0.967611
XLOC_001255	0.499237	0.4191	1.00781	1.3982	0.0648593	0.96757	0.0324297
XLOC_006255	3.94895	6.27737	0.694413	0.834552	0.0649966	0.0324983	0.967502
XLOC_003741	0.724023	0.678964	0.87178	0.984782	0.0650022	0.967499	0.0325011
XLOC_001479	1.64959	2.1578	0.773472	0.984023	0.0650645	0.0325323	0.967468
XLOC_001165	22.6578	38.6775	0.525828	1.07907	0.0650674	0.0325337	0.967466
XLOC_003480	1.72623	2.50572	0.717004	0.504743	0.0650759	0.0325379	0.967462
XLOC_000405	0.514739	0.321732	1.21749	0.924827	0.0651131	0.967443	0.0325566
XLOC_006281	1.01439	1.16592	0.703741	0.802623	0.065115	0.0325575	0.967442
XLOC_005631	5.28666	6.96778	2.63286	1.06606	0.0651743	0.0325872	0.967413
XLOC_005751	3.21869	3.61988	0.341082	1.59581	0.0652364	0.0326182	0.967382
XLOC_004368	0.77882	0.562936	1.0577	1.12338	0.0652838	0.967358	0.0326419
XLOC_005038	9.12971	15.1273	0.718798	1.17182	0.0653108	0.0326554	0.967345
XLOC_002561	0.217519	0.112442	1.85206	1.14306	0.0653175	0.967341	0.0326587
XLOC_004416	1.7707	2.00689	0.465366	1.0316	0.0653544	0.0326772	0.967323
XLOC_003253	2.56025	2.82326	1.06881	1.7166	0.0653915	0.0326958	0.967304
XLOC_000961	0.434916	0.398218	1.51149	1.04829	0.0653943	0.967303	0.0326972
XLOC_004895	3.4305	5.0184	1.02587	1.3805	0.0654625	0.0327312	0.967269
XLOC_003126	0.458278	0.485438	1.70857	1.18435	0.065479	0.967261	0.0327395
XLOC_005208	0.415871	0.287733	0.865272	0.678551	0.0655788	0.967211	0.0327894
XLOC_001197	0	0	0.59542	1.03503	0.0656221	0.967189	0.0328111
XLOC_002404	4.76045	7.47844	0.729368	1.24843	0.0656424	0.0328212	0.967179
XLOC_002550	0.171256	0.179183	1.06157	1.71703	0.06577	0.967115	0.032885
XLOC_001209	0.293688	0.260463	1.95144	1.23999	0.0658155	0.967092	0.0329077
XLOC_005609	4.40779	7.18704	0.544926	0.741654	0.0659151	0.0329575	0.967042
XLOC_000887	0.306956	0.22657	1.48027	0.968661	0.0659549	0.967023	0.0329775
XLOC_001639	5.62296	9.19276	0.377962	1.02563	0.0660112	0.0330056	0.966994
XLOC_002287	1.60624	2.48678	0.465073	0.342108	0.0660426	0.0330213	0.966979
XLOC_003692	0.605275	0.604557	1.08116	0.878256	0.066091	0.966955	0.0330455
XLOC_005073	0.436949	0.347838	2.33457	1.51048	0.0661649	0.966918	0.0330825
XLOC_003230	0.411036	0.195063	0.894382	0.724816	0.0662441	0.966878	0.0331221
XLOC_002005	0.547288	0.421233	0.761344	0.900936	0.0662769	0.966862	0.0331384
XLOC_000486	0.282079	0.219611	0.936577	1.44175	0.066335	0.966832	0.0331675
XLOC_002369	1.27012	1.63002	0.806111	0.752772	0.0663441	0.0331721	0.966828
XLOC_003835	1.96979	2.69686	1.0033	0.602037	0.0663477	0.0331739	0.966826
XLOC_001404	1.10178	0.997804	0.773217	0.608203	0.0664855	0.0332428	0.966757
XLOC_005340	0.202539	0	1.84219	3.11911	0.0665308	0.966735	0.0332654
XLOC_000008	1.73926	2.53491	0.621906	0.708332	0.0666072	0.0333036	0.966696
XLOC_004481	4.09037	6.44266	1.00507	0.878585	0.0668264	0.0334132	0.966587
XLOC_004240	0.341963	0.256746	0.751784	1.07533	0.0668338	0.966583	0.0334169
XLOC_001948	1.38842	1.55228	1.18067	1.14199	0.0668558	0.0334279	0.966572
XLOC_003701	1.33671	1.46091	1.13945	1.01572	0.0670633	0.0335316	0.966468
XLOC_004795	1.12817	0.810222	1.57828	1.81776	0.0671458	0.966427	0.0335729
XLOC_000834	1.82992	2.35483	0.93618	0.339415	0.0671993	0.0335997	0.9664
XLOC_004186	0.352219	0.491789	2.13129	1.40809	0.0672286	0.966386	0.0336143
XLOC_004238	3.67618	5.59925	1.2433	0.859645	0.0672911	0.0336455	0.966354
XLOC_006444	0.372197	0.368483	0.577432	0.733291	0.0673323	0.966334	0.0336662
XLOC_002248	1.33404	1.42449	1.02526	0.781002	0.0673479	0.033674	0.966326
XLOC_000184	2.3363	2.85339	1.09921	1.5597	0.0673773	0.0336887	0.966311
XLOC_000293	0.668277	0.610207	1.6459	1.21626	0.0674511	0.966274	0.0337255
XLOC_002504	2.45538	2.65393	1.27761	0.343273	0.0674772	0.0337386	0.966261
XLOC_003544	1.78432	2.55841	0.745378	0.769792	0.0675132	0.0337566	0.966243
XLOC_003246	0.418518	0.178567	0.837	1.12388	0.0676619	0.966169	0.033831
[truncated: 4,035 more rows]

## Sheet: Sheet1
gene	LOG2_DH_REP1	LOG2_DH_rep2	LOG2_4RD_REP1	LOG2_4RD_REP2	LOG2_4RH_REP1	LOG2_4RH_REP2	LOG2_4R4R_REP1	LOG2_4R4R_REP2
YAL004W	1.24238	1.73288	0.747059	0.939006	0.697521	1.01243	-0.0300113	0.216338
YAL005C	1.32461	1.84913	0.790228	0.916541	0.75855	1.05907	-0.0947221	0.217
YAL010C	-2.43699	-2.40711	-2.93634	-2.89901	-2.42994	-2.56086	0.301823	-0.382625
YAL017W	1.44	1.38804	0.859365	0.517033	0.62429	0.619834	0.291906	-0.0945872
YAL018C	2.00386	1.29685	0.638196	0.175565	0.577673	0.279441	-0.132531	-0.759152
YAL019W	-0.495619	-0.779946	0.00928471	-0.23776	0.10689	-0.0246852	1.69212	1.12666
YAL021C	-0.763788	-1.37945	-0.204621	-0.750881	-0.5168	-0.506882	1.23611	0.584305
YAL025C	-2.48891	-2.70305	-2.05887	-4.14326	-1.97059	-2.0648	1.69176	1.37751
YAL028W	2.00872	1.92205	1.28899	1.08608	1.13071	1.10637	0.159533	-0.278579
YAL031C	-0.509459	-0.859141	-0.975669	-1.35919	-1.08292	-1.28732	1.31179	0.687038
YAL033W	-1.50355	-1.91827	-1.96692	-1.95621	-1.91992	-1.94675	-0.0939485	0.336932
YAL034C	1.70153	1.59715	0.934712	0.977139	0.827691	0.960744	-0.155098	-0.430708
YAL034W-A	-1.33002	-1.35947	-1.4999	-1.25434	-1.48085	-1.75725	0.934309	1.41318
YAL035W	-0.589387	-0.613132	-0.896875	-1.28933	-0.863622	-1.01696	1.72516	1.50817
YAL036C	-1.0376	-1.25094	-1.33959	-1.28373	-1.46786	-1.73429	2.22767	1.53853
YAL039C	1.54015	1.94761	1.14174	1.28093	1.08333	1.23012	0.186138	0.0405784
YAL041W	0.276127	0.0183732	-0.0124677	-0.149043	0.12552	-0.27629	1.26286	0.96513
YAL043C	0.023162	-0.133415	0.106639	0.059972	-0.0653478	-0.137304	1.04002	0.674991
YAL051W	1.71074	1.83213	1.7028	1.51889	1.51273	1.5735	1.02894	0.646448
YAL053W	0.605856	0.533618	-0.35239	-0.587797	-0.443216	-0.599417	1.13189	1.03298
YAL054C	4.09292	4.72954	3.58551	3.76556	3.08286	3.50335	-0.0435179	-0.134496
YAL055W	1.31493	1.33065	1.12996	0.964706	1.05954	0.869849	-0.0783195	-0.638337
YAL056W	1.73413	1.7442	1.00385	0.697764	0.826615	0.801063	0.646194	0.233013
YAL059W	1.22295	1.595	1.12142	0.947524	1.5869	0.984953	-0.450488	-1.18225
YAL060W	1.1741	1.56897	0.64542	0.672074	0.514823	0.652015	-0.136843	-0.41314
YAL061W	1.18227	1.18377	1.17381	1.0886	0.798894	0.967052	-1.08393	-1.67677
YAL062W	3.34452	3.68519	2.77307	2.84217	2.54098	2.79957	0.233969	0.0721023
YAL067C	0.980728	1.0791	-0.329916	-0.353441	-0.527076	-0.659843	0.446518	0.495698
YAR007C	0.394034	-0.133692	-0.22925	-0.392901	-0.32833	-0.534272	1.73442	1.38211
YAR009C	0.838597	0.334502	-0.033745	-0.0917773	-0.379804	0.0290028	-1.4908	-1.58569
YAR015W	-2.26541	-3.07887	-3.12678	-3.01892	-2.74368	-2.79306	-0.264457	-0.774613
YAR023C	1.01308	0.55145	0.35665	0.437984	0.0723134	0.205718	-1.17102	-0.759903
YAR028W	-1.27437	-1.83584	-1.00538	-1.47192	-0.992838	-0.984034	0.439321	0.38928
YAR035W	3.21188	2.97482	1.36972	1.11218	1.32787	0.947308	1.74569	1.91644
YAR053W	-0.0105623	-0.0140264	-1.18471	-0.999649	-0.653001	-0.371778	-0.588421	-0.460271
YBL001C	1.05641	1.2193	0.479228	0.438564	0.309583	0.450917	-0.149706	-0.228768
YBL004W	-0.315447	-0.59347	-0.976899	-1.25189	-0.90219	-1.09154	1.39131	0.815255
YBL006C	1.31411	1.1502	1.21275	0.938917	1.01192	1.45147	0.844404	0.756698
YBL012C	2.12995	1.75011	0.911048	1.23208	0.55894	0.551833	0.0957715	-0.142067
YBL013W	1.51373	1.44924	1.06665	0.744017	1.28071	0.562199	0.0716091	0.0285358
YBL015W	2.60515	3.10914	2.05953	2.04032	1.76994	1.81756	-0.435316	-0.914952
YBL021C	2.19018	2.38003	1.63316	1.2506	1.77964	1.91408	1.03024	0.784406
YBL022C	-0.343331	-0.548763	-0.911001	-1.1874	-1.0936	-1.02816	1.56614	0.945544
YBL023C	-1.0496	-0.706586	-0.942377	-1.32525	-0.736029	-0.9048	1.94677	1.28256
YBL024W	-2.31269	-2.70878	-2.16404	-2.83489	-2.04513	-1.94196	1.19702	0.318255
YBL025W	1.13404	1.13932	1.63933	0.628384	1.46059	1.77568	0.194064	0.1284
YBL027W	0.0576461	0.00178516	0.0437433	0.120839	0.0883463	0.0339953	0.356628	0.340972
YBL029C-A	1.43469	1.7908	0.821054	0.782872	0.534684	0.65677	-0.174717	0.0581044
YBL032W	2.23082	1.9269	1.04425	0.836416	0.876653	0.629761	0.988808	0.630429
YBL033C	1.65194	1.72194	1.33333	1.30566	1.38649	1.44517	0.949138	0.981062
YBL038W	1.92984	1.80588	1.19427	0.868642	0.90547	0.713713	0.640274	0.275828
YBL039C	-1.5896	-2.42269	-1.69618	-2.31335	-2.00073	-2.82287	1.95756	1.20089
YBL041W	1.14368	1.40414	0.669919	0.679453	0.633574	0.630874	0.531431	0.605036
YBL043W	2.00927	1.70246	0.960066	0.669961	1.12364	1.264	0.419656	0.21188
YBL045C	1.39783	1.6327	0.625269	0.569237	0.483821	0.560387	-0.189864	-0.646566
YBL048W	3.56464	3.3124	2.07077	1.33624	1.61747	1.77656	-0.0311182	-0.390832
YBL049W	2.72983	3.09551	1.49947	1.52388	1.40667	1.51579	-0.00655831	-0.237251
YBL050W	1.57795	1.66043	1.27618	1.25902	1.25888	1.24688	0.309311	0.0920182
YBL054W	0.0342014	-0.124448	0.366417	0.12469	0.497	0.492918	1.67211	1.15545
YBL058W	1.7951	2.21938	1.06644	0.964943	1.08816	1.12457	0.671305	0.435935
YBL064C	1.67652	2.07144	0.835741	0.88283	0.770158	0.950339	-0.120391	-0.268581
YBL066C	2.44606	2.60369	1.98479	1.83391	1.76923	1.77255	1.19586	0.836873
YBL067C	2.42802	2.51105	2.06058	1.72905	2.11558	2.03793	0.971687	0.487867
YBL071C	2.5227	2.51915	2.11843	1.76469	2.20461	2.4419	0.629901	0.214447
YBL071W-A	2.20604	2.69676	1.76722	1.68405	1.74566	2.29413	0.53232	0.356522
YBL072C	0.0491143	-0.131626	-0.0332495	-0.159704	-0.079614	-0.150299	0.418597	0.460345
YBL075C	3.08987	3.98208	2.89964	3.10123	2.88222	3.25984	0.210856	0.559172
YBL076C	-0.983658	-1.14829	-0.188966	-0.453405	-0.0989113	-0.321323	1.79486	1.36663
YBL078C	1.51223	2.13009	0.898725	1.06913	0.834644	0.998606	0.264196	0.300942
YBL086C	2.81359	3.40615	2.59273	2.62198	2.36809	2.51128	0.165657	-0.236252
YBL087C	-0.672969	-0.905565	-0.628131	-0.69804	-0.686468	-0.802487	0.49837	0.398547
YBL092W	0.371589	0.322476	0.153694	0.231656	0.13737	0.152483	0.59404	0.627032
YBL093C	2.03769	2.22559	1.60749	1.24729	1.39181	1.43584	1.10031	1.20862
YBL104C	-1.02527	-1.15022	-1.49021	-2.27526	-1.43613	-0.76754	1.48586	1.00043
YBL111C,YBL112C,YBL113C	0.978997	0.965841	-0.124779	-0.428814	-0.392951	-1.0692	-0.086007	-0.42457
YBR002C	1.1323	1.18001	0.890517	0.845551	0.908374	0.982923	0.497039	0.379677
YBR003W	0.433423	0.388924	-0.132618	-0.506016	-0.282449	-0.331687	-0.47244	-0.816901
YBR006W	1.39091	1.49636	1.23195	1.33591	1.0829	0.947301	0.377945	-0.0289774
YBR010W	1.27745	1.88753	0.75501	0.979874	0.711713	1.08539	-0.168563	0.153169
YBR011C	0.452345	0.45566	0.29312	0.194707	0.203464	0.153353	-0.260273	-0.403122
YBR015C	-0.141248	-0.209903	0.0975763	-0.319593	-0.163341	-0.236795	0.989594	0.719319
YBR016W	1.59985	1.73972	1.15057	1.26612	0.947627	1.02181	0.684856	0.725626
YBR017C	-1.31742	-1.7636	-2.03735	-2.08859	-2.01063	-2.02807	1.32962	0.848065
YBR023C	-1.65264	-1.8329	-2.16932	-2.57715	-2.39044	-2.32418	0.62079	0.208023
YBR026C	-0.94281	-1.04795	-1.43028	-1.75908	-1.48204	-1.6479	0.447654	0.103157
YBR029C	-0.646155	-0.601513	-0.619443	-0.642148	-0.58872	-1.04561	1.31096	1.03768
YBR031W	0.0228254	-0.103318	-0.456576	-0.49648	-0.565551	-0.670459	0.441383	0.403225
YBR034C	-1.58444	-1.54137	-1.66829	-2.24683	-1.24848	-1.70725	1.38191	0.80161
YBR036C	1.71424	1.93843	1.04795	0.935982	0.918634	0.970162	0.871138	0.777746
YBR037C	2.51932	2.8311	1.82478	1.59209	1.53102	1.54739	0.225528	-0.190615
YBR039W	2.16175	2.3707	1.02492	0.999729	1.13224	1.03471	0.137437	-0.370787
YBR041W	-1.57094	-1.9755	-2.02064	-2.08107	-1.93987	-2.1978	-0.142545	-0.336124
YBR043C	0.502508	0.56138	0.94876	0.652748	0.965675	0.802536	1.86214	1.54306
YBR046C	1.2667	1.30302	0.859153	0.747262	0.784537	0.819028	0.921368	0.977449
YBR048W	-0.920835	-0.643652	-0.822827	-0.993753	-0.964267	-1.06613	0.282265	0.253126
YBR049C	3.05515	3.09552	2.6326	2.68956	2.71324	2.8361	1.10987	0.577631
YBR050C	1.31784	1.22684	2.02765	1.75051	1.69106	1.78818	0.862721	0.678069
YBR052C	1.39635	1.68768	1.03592	0.993008	0.811591	0.957523	0.121411	-0.0559484
YBR054W	-1.3725	-1.65677	-1.65562	-1.87842	-1.32845	-1.69534	0.0314219	0.0144115
YBR056W-A	0.0176629	0.272649	0.368981	0.230513	0.310905	0.407741	0.766862	0.878642
YBR058C	-1.13821	-1.59287	-2.10666	-1.87016	-2.09159	-2.32366	1.21088	0.538028
YBR063C	3.51133	3.62094	2.45789	2.07069	2.47326	2.29753	1.61351	1.29787
YBR064W	3.56487	3.85765	3.00322	2.06983	2.67877	3.09716	1.65928	1.40553
YBR065C	3.84479	4.40771	3.4164	3.43304	3.2799	3.49123	0.443367	0.101656
YBR066C	0.603395	0.414108	0.353968	0.241539	0.184243	0.17471	-0.909008	-1.64906
YBR068C	1.71442	2.0845	1.37774	1.50572	1.31922	1.56963	0.187788	-0.0685532
YBR069C	2.17124	2.39845	1.85114	1.83336	1.85016	2.07213	0.0517229	-0.690145
YBR070C	0.570944	0.577062	0.446885	0.326276	0.410683	0.311445	0.0255203	-0.193835
YBR071W	1.01599	1.22783	0.540708	0.592569	0.505673	0.613834	0.154967	0.142015
YBR072W	1.84177	2.71219	2.09743	2.31073	1.94926	2.36518	-0.1776	0.145555
YBR076C-A	2.06404	1.60806	1.01453	1.12946	0.952031	0.759287	0.279909	0.0137274
YBR077C	1.63118	2.02444	1.37111	1.49276	1.28891	1.43249	0.147017	0.154281
YBR078W	-0.981123	-1.3564	-0.771251	-0.901358	-0.733644	-1.0423	0.576504	0.567016
YBR079C	-2.65533	-2.85326	-2.21848	-2.46551	-2.03348	-2.24781	1.47121	0.539364
YBR080C	-1.31268	-1.57648	-0.965365	-1.19474	-0.681642	-1.14993	0.781039	0.149269
YBR082C	0.924489	1.10896	0.562663	0.691099	0.553278	0.678337	-0.0397964	-0.000180376
YBR084C-A	-0.270464	-0.485198	-0.280048	-0.31126	-0.239768	-0.503922	0.343622	0.321954
YBR084W	-1.63989	-1.71603	-1.95074	-2.56658	-1.51761	-2.30238	1.06703	0.998388
YBR089C-A,YBR090C	1.2058	1.65216	0.774262	0.897252	0.576129	0.747576	0.324522	0.378356
YBR101C	1.80092	2.51376	1.4681	1.62903	1.50469	1.85057	0.0233889	0.307164
YBR102C	-0.715392	-0.782238	-0.652714	-1.4096	-1.10365	-0.687035	1.41653	0.708254
YBR105C	2.1477	2.7615	1.70445	1.7195	1.75322	1.93468	0.101368	-0.0380993
YBR106W	0.406126	0.305476	-0.0570709	-0.0611527	0.0209154	-0.101215	0.787043	0.990159
YBR111C	0.687371	0.566106	0.369126	0.406342	0.452006	0.258555	-0.443021	-0.809397
YBR114W	1.5393	1.68306	1.26528	1.13308	1.15486	1.16484	0.170265	-0.34437
YBR116C,YBR117C	2.11961	2.55724	2.16245	2.21054	1.73474	1.78485	-0.626828	-0.906571
YBR120C	0.952841	0.789994	0.644623	0.170319	0.47796	0.83043	-0.147653	-0.464104
YBR121C	-2.09852	-2.70252	-2.5501	-3.01569	-2.75818	-3.15721	0.389817	-0.2062
YBR124W	-1.17462	-0.728693	-0.358759	-0.609743	-0.639531	-2.44947	1.17338	0.905692
YBR126C	1.05196	1.39087	0.635128	0.741884	0.570587	0.777664	-0.524485	-0.837425
YBR126W-A,YBR126W-B	1.33689	2.10582	0.938017	1.08832	0.746486	1.09556	-0.0336963	-0.0572647
YBR130C	-1.33451	-1.43351	-1.09509	-1.40474	-1.18567	-1.75105	0.84416	0.384048
YBR131W	-1.64134	-0.924066	-0.152786	-0.709304	-0.253351	0.0879621	1.48339	1.29429
YBR132C	1.95747	1.99485	2.41858	2.32428	1.98817	2.21314	-0.267007	-0.928599
YBR135W	0.866053	0.997541	0.135538	-0.36492	0.344329	0.117184	0.356494	0.0523612
YBR142W	-0.904062	-0.668999	-0.837854	-1.04574	-0.63062	-1.09306	1.25952	0.746292
YBR143C	-0.922383	-1.45443	-1.08455	-1.39043	-1.0281	-1.21985	0.786782	0.308809
YBR147W	2.15902	2.05339	1.37873	1.53024	1.23646	1.35708	0.278989	-0.193838
YBR151W	1.78698	2.25084	1.23725	1.28315	1.1893	1.27048	0.193968	-0.0520268
YBR154C	-1.8451	-1.72859	-1.42951	-2.14364	-1.51674	-1.77693	0.656403	0.123796
YBR155W	-0.806366	-2.03444	-1.22304	-1.72886	-0.583818	-0.648107	2.10084	1.54157
YBR156C	-1.02756	-1.1385	-1.88259	-2.33887	-2.15765	-2.20603	0.508354	0.617089
YBR162C	-0.78326	-1.28029	-1.55669	-1.86143	-1.56272	-1.7976	1.06778	0.716546
YBR164C	-1.4502	-1.95994	-2.62917	-2.9774	-2.22263	-2.98506	0.453859	0.612185
YBR165W	1.95352	2.01801	1.19236	1.07483	1.05828	0.96461	0.832458	0.404412
YBR169C	2.17145	2.54339	1.50494	1.52529	1.40406	1.57751	-0.0173914	0.00383504
YBR171W	-1.1522	-1.9999	-1.4175	-1.60155	-1.04327	-1.58083	0.966691	0.574351
YBR173C	-0.621442	-1.12729	-0.948485	-1.30427	-0.95425	-1.38384	0.906778	0.804084
YBR177C	0.786933	0.763428	0.309488	0.20618	0.223584	0.231502	-0.44999	-0.958674
YBR181C	-0.781561	-1.47354	-0.967898	-1.01693	-1.05808	-0.959763	0.792049	0.634417
YBR182C	0.38889	0.0944981	0.222968	-0.256173	0.0924771	0.119801	2.2537	2.29246
YBR183W	0.681634	0.617787	-0.453052	-0.630367	-0.470083	-0.612388	-0.0820202	-0.431448
YBR187W	-0.826665	-1.43473	-1.63934	-1.85632	-1.27328	-1.57527	0.469243	0.237987
YBR189W	-0.499424	-0.824201	-0.755781	-1.01149	-0.854291	-0.949449	1.1364	0.907324
YBR190W,YBR191W	-0.860499	-1.40564	-1.06548	-1.21759	-1.22292	-1.2475	1.04751	0.681713
YBR199W	1.40519	1.40737	0.793994	0.723824	0.734835	0.709084	0.59833	0.392086
YBR201C-A	2.29293	2.8869	0.780089	0.660208	0.610323	0.922484	0.391155	0.231805
YBR208C	0.567723	0.265151	-0.950468	-1.33378	-0.758065	-0.905575	2.81957	2.37215
YBR210W	2.11795	2.72852	1.02229	0.696352	1.0553	0.784355	0.367212	0.0561857
YBR214W	1.75748	1.93564	1.12413	1.06566	0.924962	1.03924	0.057798	-0.16584
YBR217W	1.35513	1.39689	0.668085	0.302807	0.847873	0.730791	0.538922	0.686317
YBR222C	1.73217	1.69297	0.965272	0.955549	0.941559	0.975263	0.731583	0.750857
YBR229C	-0.956863	-0.868972	-1.82843	-2.22684	-2.11858	-2.20371	0.606726	0.192345
YBR230C	0.875758	0.975218	0.483804	0.487631	0.453419	0.476546	-0.189322	-0.310113
YBR231C	-0.161658	-0.503381	-0.4118	-0.810939	-0.778377	-0.846566	1.92033	1.45518
YBR233W	-1.27082	-1.27218	-2.16415	-3.83465	-2.40997	-2.1001	1.72198	0.710772
YBR238C	-2.13578	-2.11222	-2.07793	-3.45928	-2.60537	-2.68529	0.312473	-0.405116
YBR242W	-0.772294	-0.908776	-0.667937	-0.697723	-0.659852	-0.737058	0.393898	0.0820025
YBR243C	-1.78273	-1.86996	-1.81713	-2.00481	-2.02234	-2.03514	0.69385	0.176009
YBR244W	-2.1076	-1.85997	-1.88014	-2.44929	-1.84689	-1.92409	-0.190454	-0.433474
YBR245C	-2.27985	-2.70756	-2.05546	-2.48334	-2.08183	-2.10377	1.04074	1.01506
YBR246W	-1.03779	-1.20455	-1.26722	-1.54667	-1.72087	-1.37158	0.739003	0.0657591
YBR247C	-1.59426	-1.30261	-1.47181	-2.04371	-1.66955	-1.44928	2.27533	1.23201
YBR248C	-2.88982	-3.39917	-2.57135	-3.4862	-2.71248	-2.98999	2.10847	1.10238
YBR249C	-3.0954	-3.57179	-4.16627	-4.54946	-3.9327	-4.1503	0.935077	-0.291494
YBR250W	-0.584276	-0.668242	-0.401886	-0.411074	-0.382252	-0.127334	1.25982	1.12539
YBR251W	-1.15613	-1.20173	-1.18689	-0.996214	-1.15891	-1.19302	0.254781	0.365829
YBR253W	-1.87321	-1.29649	-1.87767	-2.80157	-1.92437	-2.01259	0.689461	0.576751
YBR254C	-1.70107	-1.60323	-2.26802	-2.76795	-2.61381	-1.77525	0.535961	0.123951
YBR255C-A	-0.773271	-1.03097	-1.32094	-2.83233	-1.57678	-1.54529	0.848905	0.652113
YBR255W	-0.545641	-0.84405	-0.110982	-0.758794	-0.416644	-0.359887	0.890232	0.400241
YBR257W	-0.312452	-0.515322	-0.476509	-0.866086	-0.303974	-0.254652	1.49527	1.11221
YBR259W	0.142832	0.13309	-0.526149	-0.853669	-0.611019	-0.780889	1.39358	1.06062
YBR260C	-0.192519	-0.531298	-0.289602	-0.640758	-0.636253	-0.549298	1.05971	0.721216
YBR263W	0.350419	0.151704	-0.283714	-0.609655	-0.328609	-0.436126	1.23226	1.06479
YBR265W	0.227236	-0.195524	0.37787	-0.0935448	0.239566	-0.0535622	1.6574	1.23247
YBR266C	-1.32735	-1.86594	-1.32956	-1.44283	-0.389227	-1.66386	1.5682	0.783574
YBR269C	1.51576	1.65732	0.785562	0.778011	0.645702	0.75332	0.555768	0.351901
YBR275C	-1.59238	-1.79302	-1.86262	-1.7329	-1.48053	-1.76727	0.586565	0.00252971
YBR280C	1.70154	1.59053	1.01468	0.782704	0.512848	0.653357	1.0478	0.898777
YBR281C	-0.598527	-0.823592	-1.64635	-1.55359	-1.03207	-1.55294	1.02891	0.758571
YBR285W	0.86746	0.937814	0.363261	0.50033	0.347502	0.642245	-0.81406	-1.58059
YBR287W	0.982527	0.989985	0.386746	0.230235	0.336236	0.315881	0.457294	0.24321
YBR289W	-1.52992	-1.88048	-1.84151	-2.25549	-1.80824	-2.054	1.23356	0.385403
YBR290W	1.82605	1.73413	1.009	0.985273	1.06278	1.05213	1.04037	0.735287
YBR291C	0.321005	0.533499	-0.0742841	-0.518998	-0.190436	-0.582542	1.34634	1.26769
YBR295W	-1.15807	-0.971192	-0.432787	-0.947887	-0.728686	-0.817749	1.61578	1.0225
YBR296C	3.24686	3.47359	3.56478	3.44542	3.38437	3.38602	1.55364	1.83644
YCL001W-B	0.680745	0.334765	0.640464	0.381166	-0.116125	-0.412163	-0.443979	-0.350338
YCL002C	1.34755	1.34647	0.807773	0.749173	1.10014	1.02775	0.10922	-0.585545
YCL011C	1.06544	1.18434	0.572229	0.578625	0.583516	0.564449	0.458154	0.263531
YCL017C	1.07585	1.07795	0.482783	0.261345	0.426884	0.444891	0.45369	0.0917352
YCL025C	2.28634	2.62671	0.973705	0.934889	0.899065	1.02701	0.919811	0.883157
YCL026C-A	0.311227	0.65889	-1.0745	-1.04152	-1.12992	-0.888758	-1.93844	-2.39911
YCL034W	1.39064	1.40393	0.726726	0.621487	0.569249	0.705069	0.264718	0.044629
YCL035C	0.832921	1.2695	0.412466	0.486373	0.347247	0.392769	-0.110075	-0.0927687
YCL040W,YCL042W	1.19382	1.8331	0.73498	0.945559	0.679185	0.979256	-0.121315	-0.0345406
YCL041C,YCL043C	1.1689	1.36959	0.583756	0.408569	0.477488	0.538783	0.445153	0.215142
YCL045C	-2.00505	-2.08613	-1.79331	-2.18527	-1.88958	-2.02104	0.30147	-0.061233
YCL046W	-1.38807	-1.62047	-1.88013	-2.67277	-2.18345	-1.5549	0.156289	-0.234642
YCL048W-A	1.44591	1.62333	0.439812	0.261619	0.232309	0.412427	-0.0858503	0.0214771
YCL050C	0.961931	0.906972	0.927651	0.883586	0.946736	0.993748	0.243156	0.035144
YCL052C	1.67651	1.86062	1.02409	0.84594	0.942902	0.832216	0.477469	0.0424445
YCL054W	-2.30095	-2.34426	-2.74889	-2.69265	-2.61611	-2.38831	2.97683	1.70912
YCL057C-A	0.716832	0.980135	0.468947	0.530057	0.522092	0.585725	-0.174427	-0.481299
YCL059C	-2.33533	-2.13676	-3.05827	-2.57635	-3.05897	-4.10044	0.76655	0.542694
YCL064C	0.570806	0.377274	0.198788	0.0603165	0.0930159	0.169312	3.85906	3.70079
YCR004C	1.44516	1.62864	1.13338	1.08615	1.04898	1.11905	-0.203701	-0.428698
YCR005C	1.83137	2.42668	2.21327	2.24694	1.97199	2.31081	-0.161475	-0.0883987
YCR006C	2.93846	2.71339	2.39787	2.31466	2.10162	2.54215	0.28731	-0.0311221
YCR008W	3.00778	3.3458	2.18994	2.06652	2.20719	2.26103	0.317262	-0.00399843
YCR009C	1.15779	1.34171	0.69636	0.574785	0.625533	0.630081	0.483231	0.190293
YCR010C	4.18684	5.26944	3.79608	4.00661	3.39404	4.06601	0.218519	0.505635
YCR012W	0.279286	0.173329	-0.227791	-0.215767	-0.219353	-0.23375	-0.28311	-0.296961
YCR013C	0.304413	0.291756	-0.135864	-0.0293813	-0.165005	-0.117304	-0.302828	-0.39981
YCR016W	-1.69166	-2.48609	-2.597	-3.18528	-2.32586	-2.98322	0.498603	-0.157514
YCR020C-A	-0.710138	-0.730056	-2.04911	-1.9571	-2.12051	-1.94821	-0.0362716	0.0630412
YCR021C	1.43128	2.10074	1.11546	1.29734	0.994606	1.37309	-0.269609	-0.199722
YCR023C	0.607519	0.284994	0.492219	-0.0860728	0.473506	0.295733	-1.52403	-2.25324
YCR024C-A	0.782659	0.776289	0.305803	0.388217	0.27077	0.213675	0.356827	0.292514
YCR024C-B	1.03707	1.315	-0.044228	-0.0498475	-0.0516464	0.059027	0.235581	0.146606
YCR028C-A	-1.71922	-2.59065	-2.09692	-2.44349	-1.72802	-1.94573	1.07667	0.82476
YCR034W	-2.77972	-2.79873	-3.30137	-4.5972	-3.52854	-5.10814	0.339183	0.96632
YCR035C	-1.36834	-1.61753	-1.17714	-1.28917	-0.882134	-1.18422	1.29221	0.556346
YCR037C	-0.631818	-0.50045	-0.902738	-1.23167	-0.861565	-1.19039	1.5299	0.917585
YCR043C	-0.85845	-1.03191	-1.23049	-1.37116	-1.19418	-1.26618	0.815063	0.539721
YCR045C	1.33314	1.56882	1.2506	1.07826	0.851408	0.795448	0.369329	-0.188005
YCR047W-A	2.17496	2.34571	2.32827	2.39348	2.06634	1.91377	1.18157	0.735515
YCR052W	-0.646051	-1.25247	-0.738047	-0.996427	-0.648835	-0.728559	1.6333	0.944898
YCR053W	-0.670335	-1.01221	-0.70768	-0.973687	-0.653104	-0.803069	1.28322	0.825892
YCR060W	1.07561	1.22305	0.970409	0.902521	0.860704	1.03773	-0.210736	-0.521362
YCR068W	2.30027	2.35622	2.029	1.66731	1.69608	1.80179	0.683439	0.204765
YCR073W-A	1.36286	1.45491	1.13665	0.862725	0.873565	0.820761	0.396476	0.0910627
YCR077C	-0.797773	-1.21233	-0.88452	-1.18021	-1.15297	-0.997011	0.834275	0.447125
YCR081W	-1.65165	-1.74958	-2.23411	-2.39478	-2.3839	-2.19644	0.688233	-0.176603
YCR082W	1.43316	1.75201	0.751349	0.669615	0.688686	0.683223	0.506468	0.431343
YCR083W	1.22314	0.906049	0.524601	0.338927	0.513385	0.346471	-0.200082	-0.801347
YCR086W	-1.04459	-0.922937	-0.0540596	-0.851833	-0.787047	-1.01272	0.304379	0.151113
YCR090C	-1.02189	-1.53591	-1.89583	-1.98415	-1.79166	-2.32491	0.817149	0.196149
YCR091W	1.60918	1.57332	1.46037	1.26937	1.23071	1.36047	0.106537	-0.385162
YCR093W	-0.809052	-1.33211	-1.53949	-1.91458	-1.48519	-1.6731	0.77351	0.480111
YCR094W	-1.35255	-2.04049	-1.82599	-1.86608	-2.15566	-2.12647	0.981349	0.678657
YCR095C	1.50333	1.51493	0.19249	0.0455906	0.198266	0.41882	1.07375	0.979522
YCR107W	0.564743	0.805488	0.0563362	-0.0807026	0.312486	0.226867	-0.712732	-1.10999
YDL001W	1.85308	1.75804	1.07566	1.05769	1.35438	1.36078	0.0789502	-0.416095
YDL002C	2.01226	2.33055	2.03821	1.93355	1.79386	2.06411	0.0468064	-0.639231
YDL004W	1.67275	2.07161	1.15247	1.0913	0.898886	1.09916	-0.352571	-0.596022
YDL005C	1.97184	1.90349	1.21194	1.25423	1.36643	1.27886	0.502754	-0.0828208
YDL007W	1.24458	1.4251	0.671287	0.693558	0.63807	0.674471	0.933234	0.87215
YDL012C	1.41363	1.7086	1.35332	1.35299	1.29366	1.61847	0.128041	-0.0150747
YDL014W	-1.92524	-2.51117	-0.854265	-1.02171	-0.781828	-1.11876	1.83428	0.853099
YDL019C	0.583591	0.407107	1.02707	0.908358	0.961025	1.03085	-0.804434	-1.35911
YDL020C	2.12282	2.66683	1.20306	1.24174	1.04271	1.24288	0.472462	0.585796
YDL022C-A,YDL024C	3.5714	3.81047	2.84899	3.12905	3.32707	2.96097	-0.793249	-1.8354
YDL022W	1.85819	2.55282	1.4108	1.59435	1.24883	1.6454	-0.234116	-0.174712
YDL023C	2.28085	3.12925	1.6674	1.7013	1.37795	1.86235	-0.148143	-0.234504
YDL025C	2.55968	2.93999	2.24768	2.28331	2.15993	2.32196	0.23139	-0.0292486
YDL025W-A	2.91651	3.2167	2.43813	1.3209	1.94535	2.32897	-0.442064	0.638669
YDL026W	0.611834	0.705424	0.80745	0.439053	0.532406	0.305726	-0.397098	-0.34116
YDL031W	-0.587581	-0.813385	-0.0673628	-0.137665	-0.16803	-0.13535	1.42894	0.713266
YDL032W	-0.130068	0.0787131	0.236569	0.374153	0.105866	0.422589	1.31572	1.38495
YDL040C	-2.23335	-3.13408	-2.41877	-2.89584	-2.56308	-2.44478	0.762432	0.25962
YDL042C	-0.394778	-0.33937	0.393404	0.0429592	0.413473	0.312871	0.821172	0.56793
YDL043C	-2.23848	-2.6558	-1.65646	-2.02015	-1.39309	-2.43129	1.37116	0.475502
YDL044C	-0.626573	-1.02759	-1.09227	-1.66193	-0.719051	-0.881888	0.559614	0.641301
YDL045C	-0.44039	-0.736121	-0.251353	-0.298477	-0.135183	-0.275157	0.558208	0.437371
YDL046W	1.46917	1.75013	0.825133	0.841506	0.778645	0.914862	0.00917684	-0.142126
YDL047W	2.10108	2.2698	1.74311	1.81044	1.72869	1.90785	0.170108	-0.134208
YDL050C	-1.10393	-1.2092	-1.75936	-1.73435	-1.56853	-2.2778	0.687485	0.324807
YDL055C	-0.583164	-1.02887	-2.31618	-2.5331	-2.37482	-2.63441	0.302535	0.242249
YDL062W	-2.26328	-2.09172	-1.01403	-0.203424	-0.0215117	-1.31584	2.49407	1.70862
YDL067C	2.13592	2.85262	1.26041	1.19668	1.06943	1.0713	0.331999	0.109795
YDL068W	1.83	1.66427	1.70256	0.543215	1.54712	2.00763	-0.671349	-1.47451
YDL070W	1.24741	1.46266	1.14378	1.12906	1.12068	1.27303	0.453247	0.496541
YDL071C	2.60179	2.88763	2.20822	2.20233	1.86653	1.27095	0.952544	0.554827
YDL073W	-0.15824	0.0525384	-0.478122	-0.616549	-0.274908	-0.34163	0.80864	0.641366
YDL075W	-0.706083	-1.07874	-0.843887	-0.957331	-0.876426	-0.919061	0.734352	0.401075
YDL076C	1.22273	1.31862	0.956915	0.937095	0.959489	0.793144	0.572465	0.249993
YDL079C	1.59701	1.68628	0.890821	0.84789	0.742909	0.848004	-1.20792	-1.69562
YDL081C	0.0828124	-0.00953536	-0.395458	-0.564003	-0.560635	-0.837993	0.429889	0.494697
YDL082W	-1.10886	-1.94924	-2.01618	-2.40855	-1.72721	-2.17905	0.782748	0.362814
YDL083C	-0.816503	-1.28608	-0.635097	-0.829258	-0.726743	-0.748878	0.727279	0.689341
YDL085C-A	0.82978	0.866822	0.927107	1.10593	1.05922	0.968052	0.196918	-0.0180127
YDL085W	2.24637	1.76665	1.19651	1.16679	0.968159	0.693972	0.500192	-0.176915
YDL097C	1.17331	1.23882	0.609422	0.44473	0.458095	0.581142	0.812475	0.842778
YDL099W	-0.208865	-0.236432	-0.728456	-1.06127	-0.582735	-0.896108	1.22468	0.789397
YDL100C	0.0278463	-0.179238	-0.967431	-1.16814	-1.00016	-1.0626	1.48547	1.27419
YDL102W	-0.449303	-0.860406	-1.84419	-1.83975	-1.75768	-2.55453	1.06247	0.905351
YDL103C	-1.2403	-1.32336	-2.63522	-2.81613	-2.58681	-2.4735	0.741334	0.348351
YDL106C	0.292574	-0.0906938	-0.330343	-0.441308	-0.451675	-0.535948	1.6701	1.32889
YDL110C	0.286543	0.220151	0.316205	0.411238	0.460519	0.515761	-0.254546	-0.427527
YDL112W	-0.564315	-0.588984	-1.06158	-1.64647	-1.35239	-1.21049	1.386	0.702664
YDL113C	1.80941	1.80248	1.58718	1.24246	1.27639	1.49357	0.790739	0.784389
YDL116W	-1.06464	-2.11018	-1.46982	-1.31458	-1.07387	-1.01468	1.66705	1.28229
YDL117W	-1.83218	-2.00646	-2.96977	-3.3275	-2.73032	-2.91219	0.613309	0.0274163
YDL121C	-1.39201	-1.71381	-1.49335	-1.58278	-1.35395	-1.68989	1.51293	0.884965
YDL123W	2.55693	2.80273	1.97023	2.03592	1.87221	1.9911	0.480307	0.0992297
YDL124W	1.35271	1.91694	0.963092	1.0715	0.869414	1.06203	-0.150634	-0.134469
YDL125C	1.19778	1.4286	0.615757	0.818	0.583492	0.623144	0.061192	-0.018797
YDL126C	0.991339	1.16469	0.270219	0.209444	0.168492	0.188264	0.459905	0.429517
YDL127W	0.673616	0.861415	-1.01799	-1.05565	-1.13558	-1.11332	0.0731791	-0.153662
YDL128W	1.49827	1.44942	0.166494	-0.12854	0.242302	0.228716	-0.229627	-0.663732
YDL129W	2.17306	2.68308	2.23203	2.07441	1.89307	1.94172	0.59643	-0.164149
YDL130W-A	0.955482	1.51792	0.557401	0.582106	0.468141	0.587222	-0.120765	-0.159624
YDL131W	0.102035	0.0616009	0.358735	0.171724	0.241758	0.251047	1.2599	1.15214
YDL132W	-1.4539	-1.76387	-2.65934	-2.76298	-2.66425	-2.81467	1.15409	0.717636
YDL133W	2.41896	2.35385	1.8401	1.60664	1.87109	1.87926	0.794619	0.409062
YDL137W	1.12267	1.5587	0.753025	0.781022	0.727598	0.95826	0.0734255	0.0999788
YDL138W	0.993124	0.753827	0.596573	0.345562	0.557539	0.633023	0.0532523	-0.239486
YDL143W	-1.34675	-1.93212	-2.07702	-2.61005	-2.29926	-2.19581	1.63764	1.36257
YDL144C	-0.78903	-1.01148	-0.984838	-1.09839	-0.445035	-0.973855	0.860776	0.538713
YDL145C	-2.37625	-3.39648	-3.12275	-3.17322	-2.97371	-3.39099	0.608804	0.134031
YDL146W	-0.915703	-0.619322	-0.759418	-1.04637	-0.940657	-1.28438	0.162472	0.1277
YDL148C	-0.95411	-1.38511	-2.02153	-2.18767	-1.31252	-1.78027	2.15472	1.77713
YDL150W	-1.74274	-1.77827	-2.02672	-2.46885	-2.24513	-2.49904	1.49782	1.03579
YDL153C	-1.09178	-1.64931	-2.00284	-2.11929	-1.78691	-1.66215	2.12749	1.61545
YDL155W	0.385065	0.424896	0.18668	-0.0668404	0.227674	0.198227	1.84887	1.40489
YDL156W	-1.06815	-1.24653	-0.2037	-1.28773	-0.640647	-0.479943	1.10722	0.557299
YDL157C	-1.46415	-1.74696	-1.34193	-1.61925	-1.13025	-1.64151	0.885928	0.734649
YDL159W	2.98629	3.00833	2.0957	1.97863	1.89694	1.72723	0.733353	0.528096
YDL161W	-1.59953	-2.1825	-1.43382	-1.92338	-1.60931	-1.64317	0.514957	0.293997
YDL163W	-2.44999	-1.83409	-2.94711	-2.17793	-1.55492	-2.15878	1.70499	0.379975
YDL166C	-1.08882	-1.57832	-0.575657	-0.919246	-0.56882	-1.57568	0.504229	0.163045
YDL168W	0.822482	0.665019	1.17503	0.940773	1.2598	1.20992	0.279164	0.131319
YDL169C	2.2498	2.42405	1.82002	1.50143	1.55921	1.70362	0.731185	0.557252
YDL170W	3.16535	3.51221	2.36245	2.13093	2.64167	2.73143	1.0781	0.756344
YDL173W	1.7418	1.857	0.887096	0.895705	0.938124	0.898681	0.936993	0.998646
YDL174C	1.96811	2.52537	1.93704	2.01837	1.78391	2.09284	0.50154	0.121478
YDL180W	2.83186	3.02335	2.5236	2.34322	2.22862	2.45041	0.513501	0.108322
YDL181W	2.43651	2.86766	2.11652	2.42421	1.96717	2.39775	-0.217053	-0.38587
YDL182W	1.67824	1.99038	1.40092	1.41189	1.28093	1.31197	0.675143	0.13924
YDL183C	2.79069	3.18386	2.03616	1.68985	1.78662	1.53809	0.501972	0.00198242
YDL186W	1.19143	1.34678	-0.108167	-1.13291	-0.614587	-0.391394	0.346139	0.0692375
YDL192W	-0.138493	-0.281214	-0.0256454	-0.197183	-0.12139	-0.232953	0.914652	0.525249
YDL197C	1.29927	0.916002	0.977813	0.590827	0.520684	0.588791	-0.0846342	-0.426214
YDL201W	-0.670878	-0.995301	-0.613323	-1.30853	-0.36062	-0.649992	1.23161	1.18128
YDL206W	1.08164	0.789057	0.2089	-0.18904	0.610872	0.255064	-1.42469	-2.34829
YDL208W	-0.720939	-1.26992	-1.67079	-1.60249	-1.42199	-1.66346	0.707713	0.412483
YDL214C	4.87756	5.50046	4.01116	4.34305	3.82551	4.08591	-0.378947	-0.776165
YDL218W	0.932984	1.04505	0.591352	-0.241622	0.428412	-0.11852	-1.07451	-1.81829
YDL221W	1.37612	1.34761	0.635856	-0.17513	0.395735	-0.289381	-0.170927	-0.016918
YDL222C	3.13752	3.64012	2.11699	2.11124	1.71082	2.01734	-0.140684	-0.0179225
YDL223C	1.51035	1.49399	0.538059	0.359921	0.50686	0.424465	0.178812	-0.059712
YDL225W	-1.75625	-1.29871	-1.67433	-1.91256	-1.59664	-1.37833	1.7796	0.66692
YDL226C	-1.1704	-1.93501	-1.42547	-1.90736	-1.49253	-1.8663	1.19557	0.512033
YDL228C	-1.41304	-1.49783	-1.74035	-1.82395	-1.54285	-1.88009	0.943957	0.442129
YDL229W	-1.50116	-2.08191	-1.6652	-1.97612	-1.97479	-2.28172	0.740151	0.403613
YDL230W	1.58709	1.59752	1.12573	0.901492	0.912612	0.915168	0.332273	-0.24865
YDL231C	3.05432	3.13538	1.94855	1.7652	1.69484	1.77873	1.68258	1.25294
YDL243C	0.742954	0.767632	1.11785	0.874413	0.980988	0.855115	-1.64654	-2.56829
YDR001C	1.56531	1.87859	0.895658	0.929148	0.878027	1.00512	-0.00747813	-0.246983
YDR002W	1.05552	1.54911	0.656264	0.738609	0.663633	0.831344	-0.0318858	-0.105439
YDR003W	2.54255	2.91884	2.05184	2.21133	2.08621	2.45303	0.0272471	-0.0846832
YDR003W-A	2.30263	2.47278	2.532	2.1102	2.74308	2.38697	-0.0679179	0.131327
YDR006C	2.31831	2.08184	1.53015	1.19572	1.48787	1.3972	1.00501	0.706736
YDR007W	1.16643	1.35721	0.805127	0.997327	0.76602	1.03989	-0.0342425	0.000243346
YDR008C	1.08368	1.37323	0.863781	1.06776	0.760665	1.15548	-0.0380027	-0.0231427
YDR009W	0.827024	0.54366	0.656021	0.236546	0.39501	0.0974459	-0.0682174	-0.164174
YDR011W	1.80503	1.80585	1.56114	1.31775	1.5003	1.66761	1.47947	1.4898
YDR012W	-1.18487	-1.63181	-1.03722	-1.10298	-1.02828	-1.17538	1.35042	1.17064
YDR017C	1.68652	1.61464	1.57018	1.44435	1.68696	1.64843	0.0520885	-0.535825
YDR018C	1.36945	1.10433	0.54012	0.446212	0.225107	0.271706	-0.418769	-0.896981
YDR019C	-0.518	-0.86122	-0.229594	-0.542333	-0.358252	-0.555374	0.785496	0.485704
YDR023W	-2.6254	-3.5791	-3.71369	-3.35649	-3.42191	-3.20247	0.705015	0.281697
YDR025W	-1.20431	-1.18768	-0.842616	-1.00151	-0.875068	-0.874631	0.691389	0.83032
YDR026C	0.364633	0.0987765	0.391609	0.312943	0.670637	0.582479	1.30664	1.01745
YDR029W	2.24643	2.02462	1.4915	1.21166	1.49308	1.64927	0.656813	0.18179
YDR031W	0.620492	0.291548	0.196487	0.178278	0.0869324	0.130855	-0.500096	-0.814555
YDR034C	2.49925	3.01342	2.59756	2.46448	2.28249	2.43714	0.764295	0.0117322
YDR034C-A	1.15165	1.75535	0.517303	0.751018	0.696823	0.879486	-0.106879	0.129669
YDR034W-B	1.11724	1.32604	0.595341	0.668399	0.397	0.673777	0.00610564	0.271564
YDR035W	0.815568	0.867264	0.832589	0.648946	0.721719	0.754608	0.445371	0.287114
YDR036C	0.293356	0.255197	0.750688	0.537772	0.753049	0.849799	1.94393	1.43235
YDR037W	-1.32827	-1.91493	-1.72522	-1.89554	-1.48053	-1.72076	1.11425	0.756587
YDR040C	4.37587	5.09004	3.37513	3.37984	3.13226	3.62726	0.124826	0.0964997
YDR041W	1.90839	2.60532	1.63181	1.5585	1.41445	1.77596	0.160248	0.0384264
YDR042C	1.79896	1.83345	1.29255	0.320093	0.974739	0.906143	-0.910103	-1.7632
YDR043C	1.4277	1.65353	1.12724	1.25743	1.20695	1.24299	0.550176	0.513497
YDR046C	0.947223	0.97297	0.939357	0.990753	1.11733	0.957673	-0.778174	-1.3997
YDR049W	-0.600614	-0.568775	-0.0665778	-0.501411	-0.165993	-0.45095	0.820588	0.542335
YDR054C	1.86586	2.20587	1.65737	1.72995	1.57833	1.85708	0.425253	0.264075
YDR055W	-1.66452	-2.28837	-2.1682	-2.157	-2.10869	-2.46739	0.0474291	-0.359349
YDR059C	0.904532	0.955136	0.870353	0.861163	0.691874	0.718201	0.458879	0.470494
YDR060W	-1.37415	-1.28646	-1.33609	-2.10909	-1.24599	-1.24279	2.05551	1.35962
YDR062W	-1.13431	-1.3264	-0.991893	-1.20891	-0.848911	-1.19119	0.694801	0.0994739
YDR064W	-0.600983	-0.895187	-0.369394	-0.555726	-0.445864	-0.653003	0.88436	0.880278
YDR065W	-0.54623	-0.322725	-0.378671	-1.51502	-0.444572	-0.492768	0.493246	0.30716
YDR069C	2.07561	2.28842	2.21244	1.98373	2.15132	2.24421	0.345189	-0.210945
YDR070C	2.38357	3.27547	1.80865	2.12272	1.55856	2.0084	-0.193474	-0.0593202
YDR071C	1.26303	1.38596	0.618915	0.57232	0.769328	0.516012	0.128707	0.045744
YDR072C	2.13425	2.14129	1.38657	1.41465	1.34629	1.45006	1.16775	0.79434
YDR073W	1.73387	1.77483	1.533	1.54481	1.37006	1.43898	0.0752144	-0.225169
YDR074W	1.64273	2.16378	1.27574	1.47123	1.15444	1.47772	-0.205648	-0.275162
YDR078C	2.54502	2.51792	2.07792	2.13228	2.04545	2.50219	0.138628	-0.39321
YDR079W	1.773	1.77042	1.31886	1.40459	1.4391	1.05528	-0.282344	-0.552824
YDR087C	-1.33328	-1.88992	-0.554832	-1.01416	-0.305431	-1.1813	1.02624	0.283184
YDR088C	2.25983	2.32466	1.55118	1.6205	1.56206	1.73751	-0.124095	-0.976466
YDR089W	0.983057	0.623403	0.259637	-0.277546	0.286878	0.27056	-0.562214	-1.22661
YDR090C	1.53315	1.54189	2.1717	1.8576	1.91149	1.96149	1.15641	0.957761
YDR091C	-2.77666	-3.61857	-2.68689	-3.08699	-1.92948	-2.54451	0.307543	0.169091
YDR096W	2.68737	2.95688	2.56538	2.46166	2.39843	2.57907	0.467535	0.321406
YDR099W	1.0185	1.29643	0.386215	0.264375	0.208962	0.265769	-0.0545897	-0.392609
YDR104C	-0.742718	-0.517614	0.171337	-0.215147	0.181911	0.184306	1.63056	1.20969
YDR111C	3.35537	3.59285	2.41787	2.05621	2.2356	2.45657	1.51243	1.43651
YDR115W	0.958966	1.26733	0.467614	0.374643	0.525749	0.662542	0.166167	-0.193492
YDR117C	-0.599838	-0.742572	-0.50974	-1.05663	-0.423027	-0.616732	1.10073	0.837107
YDR119W-A	1.54864	2.03708	0.550144	0.536866	0.436337	0.600457	-0.21725	-0.212218
YDR121W	-0.196894	0.00168531	-0.168741	-0.425083	-0.333181	-0.357097	1.77982	1.31979
YDR125C	0.556073	0.816784	0.193278	-0.075046	0.307271	-0.0362805	-0.60767	-1.0097
YDR127W	-1.33514	-1.88431	-1.76376	-1.86989	-1.57576	-1.5704	0.746655	0.395967
YDR129C	0.834478	0.983183	0.406696	0.351452	0.318686	0.380905	0.447703	0.353794
YDR133C	0.467862	0.644428	-0.00370715	-0.111465	-0.126658	-0.127289	-0.364299	-0.489368
YDR139C	0.340853	0.213111	-0.113103	-0.136711	-0.0327224	-0.132899	0.87748	0.857952
YDR147W	1.67184	1.41199	1.56804	1.22773	1.46489	1.82094	2.8209	2.56747
YDR148C	0.94872	0.938135	0.423717	0.211162	0.414418	0.341785	-0.00796439	-0.436107
YDR149C	2.15921	2.50275	3.09744	2.90837	1.7809	2.58925	0.874675	0.905459
YDR150W	2.05511	2.19478	1.2503	0.822311	1.03653	1.04696	1.06393	0.681852
YDR151C	2.52764	3.16629	2.00878	2.0891	2.07298	2.38965	0.189329	-0.226419
YDR152W	1.68718	1.47522	1.18936	1.20707	0.949987	1.12035	0.881611	0.756081
YDR153C	2.00366	1.97597	1.55314	1.47188	1.55059	1.74231	0.426565	-0.301295
YDR154C,YDR155C	1.11314	1.60984	0.743452	0.96344	0.730756	1.07366	-0.0669134	0.182573
YDR156W,YDR157W	2.74313	2.88147	2.26878	2.39242	2.2691	2.74698	0.341257	0.368523
YDR161W	-1.19686	-1.11618	-1.87704	-1.94052	-2.10767	-1.91236	1.73512	0.777039
YDR162C	0.938623	0.906557	-0.52146	-0.873126	-0.622553	-0.877055	1.3703	1.30732
YDR164C	-1.02205	-1.86846	-1.20382	-1.65326	-1.59637	-1.85314	0.745001	0.473452
YDR165W	-1.22782	-1.05425	-2.05339	-1.3078	-1.43483	-1.59958	0.747494	0.525378
YDR171W	1.58033	2.34975	0.943468	1.16999	0.901102	1.27102	-0.136389	0.171719
YDR173C	1.27756	0.999511	0.339076	0.227477	0.244317	0.401427	-0.077973	-0.229543
YDR174W	1.56042	1.69346	1.75782	1.8181	1.83595	2.07059	0.796596	0.778817
YDR178W	1.94159	2.17512	0.957482	0.976924	0.97725	0.958726	-0.00693338	-0.493471
YDR181C	-1.11045	-0.82789	-1.19268	-1.32176	-0.818707	-0.728338	1.30849	1.1565
YDR182W	-0.377741	-0.367883	-0.418062	-0.572322	-0.428523	-0.134797	0.703085	0.456984
YDR185C	1.56751	1.42981	1.13773	0.909893	1.05218	0.995318	-0.45988	-1.39763
YDR186C	2.80514	2.77604	1.9219	1.89046	1.78327	2.03825	0.997218	0.860099
YDR189W	-0.825558	-1.10133	-1.39123	-1.55395	-1.20893	-1.74398	1.14436	1.073
YDR190C	-1.48898	-1.62233	-1.44299	-1.95106	-1.43956	-1.64491	1.29554	0.549366
YDR191W	-0.959907	-1.38538	-1.34353	-1.88824	-1.32912	-0.928201	0.657008	0.152402
YDR193W	0.319016	0.429497	0.149424	-0.318339	-0.113817	0.335403	1.34038	1.40838
YDR197W	-2.18569	-3.1634	-2.18189	-2.57521	-2.80575	-2.47401	-0.222913	-0.317129
YDR202C	1.43288	1.53912	0.529781	0.422335	0.357998	0.112689	-0.0490371	-0.88215
YDR203W	1.304	1.08702	0.324195	-0.0758258	0.467304	0.254508	-0.193356	-0.450381
YDR207C	1.4705	1.39333	2.49461	1.96054	2.07786	2.2078	1.87887	1.99449
YDR208W	2.05404	2.29317	1.63414	1.43892	1.51724	1.6288	0.941867	0.557211
YDR209C	-0.149569	-0.326445	-0.0774898	-0.383966	-0.125768	-0.336337	1.36041	1.38701
YDR210C-D	1.25473	0.429472	0.485435	-0.0230201	0.285954	0.0807018	-1.11845	-1.45331
YDR212W	-0.971163	-1.24951	-1.0802	-1.50503	-1.29243	-1.08634	1.13005	0.816334
YDR213W	-0.485855	-0.739564	0.603211	0.248746	0.73097	0.318289	1.93227	1.47322
YDR214W	1.30372	1.54004	1.35123	1.29699	1.4234	1.44271	0.0684627	-0.0739039
YDR216W	1.89244	2.21494	2.01541	1.93855	1.84264	2.05076	0.155682	-0.0603373
YDR218C	2.16032	2.33292	1.17478	0.762011	1.35996	1.49447	0.703569	1.05497
YDR219C	2.31102	2.18027	1.77146	1.34083	1.55348	1.66187	0.653047	-0.238433
YDR221W	-0.812886	-0.932454	-0.899959	-1.04587	-0.821193	-1.09321	0.274376	-0.129505
YDR222W	0.334562	0.231455	-0.110945	-0.625762	0.145954	0.272548	1.81719	1.37427
YDR226W	-1.77074	-1.48685	-1.31715	-1.60765	-1.41936	-1.53823	-0.233254	-0.591112
YDR230W	1.83048	2.42338	1.4085	1.5213	1.2711	1.11442	0.276373	0.041743
YDR231C	2.24288	2.15865	1.51878	1.42174	1.35231	1.44765	0.306121	0.0921778
YDR232W	2.55185	2.37249	1.71151	1.65832	1.55582	1.6775	1.28257	0.791405
YDR239C	-0.579968	-0.788791	-0.590613	-0.78581	-0.458141	-0.765112	1.36126	0.685777
YDR244W	1.5173	1.75967	1.32404	1.05293	1.4395	1.59542	0.762735	0.357469
YDR245W	1.50911	1.42984	1.05793	0.955998	1.17337	1.001	0.574628	0.0803808
YDR246W	1.46219	1.73078	1.35562	1.25716	1.24361	1.41866	0.292013	0.226164
YDR247W	3.2412	3.92574	3.34715	3.4254	2.97065	3.45535	-0.215571	-0.362027
YDR249C	3.25329	3.22756	1.88498	1.86106	2.02313	2.2083	0.581524	0.320216
YDR251W	1.57204	1.70065	1.03365	0.840213	0.855464	0.911123	0.616542	0.115765
YDR253C	1.6111	1.55518	0.192298	0.0151123	0.249527	0.0523837	-1.03063	-1.29501
YDR255C	2.2048	2.22647	1.83148	1.52761	1.3974	1.60336	0.193629	-0.366872
YDR256C	3.78905	4.33744	2.48124	2.66516	2.3886	2.74043	0.498508	0.6823
YDR258C	1.95893	2.51444	1.43121	1.55866	1.45564	1.72055	0.0298829	0.136833
YDR261C-D	1.43039	1.92125	-0.0208881	-0.0312996	0.00487333	0.416089	0.0908463	-0.283791
YDR262W	2.56488	3.2928	1.71695	1.86887	1.70811	1.97049	-0.018597	-0.0948912
YDR267C	-0.981377	-1.71141	-1.33318	-1.58795	-1.19712	-1.42899	1.69873	0.763603
YDR272W	1.51484	1.53968	0.890573	0.865449	0.824184	0.955231	-0.0599841	-0.417457
YDR273W	2.09792	2.05135	1.9789	1.53751	1.78512	1.52284	0.771616	0.632023
YDR275W	3.68216	3.93157	3.34479	3.73493	3.14465	3.7982	0.410973	0.366505
YDR276C	1.15039	1.56202	0.66706	0.810409	0.652158	0.87376	-0.0405776	0.159927
YDR277C	1.85808	2.50139	1.71418	1.83292	1.61188	2.00869	0.142624	0.233105
YDR284C	-2.31256	-1.99417	-2.28931	-2.77499	-2.28134	-2.81268	-0.132805	-0.0396037
YDR285W	-0.556536	-0.920482	-0.880883	-0.936641	-0.661983	-0.781776	0.8748	0.541823
YDR291W	-0.165168	-0.162516	-0.269281	-0.351315	-0.153599	-0.269546	1.09248	0.650165
YDR292C	-0.760834	-1.03836	-1.00616	-1.45167	-0.959099	-0.987049	1.36439	0.863744
YDR294C	-0.843818	-1.13098	-1.36042	-1.51697	-1.37952	-1.43031	1.22047	0.784532
YDR295C	-1.91993	-1.81999	-2.62397	-2.61986	-2.53476	-3.20591	0.912977	0.0872202
YDR297W	0.635315	0.506987	0.166507	-0.1595	0.138285	0.0217224	1.21234	1.0716
YDR299W	-0.85689	-2.2001	-1.23746	-1.15262	-0.490216	-0.585525	2.50407	2.16264
YDR300C	-2.12313	-2.29194	-2.39018	-3.17501	-2.79968	-2.29986	0.651806	0.208909
YDR301W	-1.20799	-1.48201	-1.58784	-1.87556	-1.37084	-1.64132	0.823858	0.183476
YDR303C	-1.63575	-1.24954	-1.59987	-1.89683	-1.8341	-1.84166	0.582965	0.124907
YDR305C	-0.994227	-0.883564	-1.4642	-1.44125	-2.0037	-1.65515	0.794848	0.277651
YDR312W	0.0874964	-0.390424	0.311432	0.0048324	0.45875	0.237076	2.48296	1.78879
YDR313C	3.54094	4.35547	2.74976	2.62699	2.56386	2.72185	0.759418	0.520997
YDR322C-A	1.02058	0.87964	0.45119	0.831389	0.739136	0.563424	-0.323234	-0.613096
YDR323C	-1.06803	-1.36068	-1.54373	-1.38627	-0.669158	-1.12123	0.980854	0.449779
YDR325W	-0.393976	-0.88983	-0.635981	-0.992935	-0.564905	-0.0787456	1.42402	1.11446
YDR326C	-0.934966	-1.26085	-0.969512	-1.41723	-0.879487	-0.909906	1.33643	0.872095
YDR329C	1.94196	2.12419	1.27883	1.13674	1.14418	1.17868	0.790753	0.727484
YDR334W	2.50712	2.71865	2.64785	2.55495	2.30747	2.48628	0.63359	-0.0488378
YDR341C	-2.74986	-2.81662	-2.77345	-3.21065	-2.41043	-3.1365	0.154341	-0.030874
YDR342C	0.917092	1.44445	0.733362	0.789175	0.603983	0.864964	-0.235876	-0.283195
YDR344C	0.650435	1.07421	-2.97105	-2.41129	-2.24468	-1.15823	-1.92094	-3.04312
YDR349C	1.27402	1.16596	0.78896	0.599838	0.771158	0.700822	0.601055	0.317191
YDR354W	-0.872292	-1.2374	-0.739293	-0.933942	-0.755131	-0.880842	1.89411	1.55029
YDR357C	1.04721	0.709718	-0.0123283	-0.0901401	0.241537	0.175253	0.0111533	-0.1847
YDR358W	1.39801	1.2147	0.97261	0.65528	0.736279	0.769826	-0.0296181	-0.449761
YDR361C	1.97404	1.99908	1.69967	1.42853	1.85373	1.93706	1.11923	1.01785
YDR363W-A	1.20097	1.12661	0.716582	0.627154	0.476582	0.560859	0.761435	0.668926
YDR365C	-1.65788	-1.91121	-1.12124	-1.55519	-1.40934	-1.29408	1.07871	0.410053
YDR371W	-1.76193	-1.40815	-2.08276	-2.09996	-2.05872	-2.32225	1.07624	0.373607
YDR372C	-0.978336	-1.25316	-1.72062	-1.83107	-1.2634	-1.28623	0.762729	0.195284
YDR374C	2.86884	2.805	1.19844	1.08977	1.12013	1.25187	0.443724	-0.422542
YDR377W	1.99728	2.60453	1.61309	1.81902	1.51735	1.82698	-0.279471	-0.697762
YDR379C-A	1.73895	2.11256	0.893883	0.578568	0.899438	0.934926	0.465135	0.624995
YDR380W	-0.0569688	-0.26778	-0.295218	-0.550302	0.165662	-0.733856	3.63144	3.62323
YDR384C	2.31827	2.63936	1.92711	1.84552	1.73275	2.14522	0.635318	0.595414
YDR385W	-0.674087	-0.910758	-0.750875	-0.827905	-0.718516	-1.12468	0.461756	0.10435
YDR394W	0.695877	0.724534	0.112654	-0.058119	0.121459	-0.194143	1.42068	1.36288
YDR395W	-0.731	-1.0901	-0.582125	-0.918632	-0.407201	-0.259266	1.2953	1.04395
YDR397C	-0.30814	-0.655193	-0.0536066	-0.494938	-0.248775	-0.245558	0.799345	0.525172
YDR398W	-1.1015	-1.70518	-1.14916	-1.33294	-0.900499	-1.57968	1.3311	1.21576
YDR403W	1.87434	1.84459	0.731384	0.441894	0.472675	0.638773	0.69231	0.351347
YDR405W	1.44749	1.75488	1.23096	1.28196	1.12733	1.41821	0.377951	0.258847
YDR407C	-1.15766	-1.29096	-1.65224	-2.22527	-1.4252	-1.61369	1.07206	0.803887
YDR408C	0.625036	0.662125	0.746647	0.638061	0.556434	0.662405	0.153923	-0.107453
YDR411C	-0.494661	-0.761513	-0.899811	-1.33093	-1.03003	-1.11157	0.80669	0.548609
YDR413C	-1.04345	-0.786777	-0.402084	-0.813767	-0.596035	-0.346459	0.937808	0.896176
YDR417C	-0.182673	-0.7363	-0.584785	-0.628327	-0.289557	-0.528072	0.952938	1.2952
YDR418W	-0.706323	-1.36665	-0.654372	-0.801461	-0.996088	-0.914023	0.858515	0.498285
YDR419W	1.30975	1.07569	0.996416	0.782044	1.19389	1.06991	0.402372	0.0653268
YDR420W	-1.13655	-0.962708	-1.48896	-1.616	-1.28764	-1.34785	0.656629	0.305429
YDR423C	1.5414	1.4479	1.41168	1.07306	1.00681	1.06555	0.14492	-0.400365
YDR427W	-0.69788	-1.36429	-1.68846	-1.84506	-1.37951	-1.63493	1.6115	1.01732
YDR428C	-1.26433	-1.74373	-0.829281	-0.671778	-0.934965	-0.958361	0.622543	0.862069
YDR429C	-1.0177	-1.21307	-0.962119	-1.04388	-0.874702	-1.20689	1.47641	0.616673
YDR432W,YDR433W	1.49742	1.77268	0.92432	0.901204	0.816002	1.00234	0.589699	0.61256
YDR434W	-0.424614	-0.494473	-1.03575	-1.73802	-1.16126	-1.46573	0.906198	0.449676
YDR435C	1.69615	1.68202	1.08137	0.847657	0.934977	0.746792	0.381131	0.121871
YDR437W	-0.766663	-0.571477	-0.653072	-0.707246	-0.403845	-1.53622	0.800509	0.281734
YDR440W	-1.11139	-2.13026	-1.20636	-1.57153	-1.11111	-1.61255	1.26181	0.710839
YDR447C	-0.686709	-1.12066	-0.896206	-1.21596	-0.872577	-0.892903	0.650723	0.964961
YDR448W	1.92772	1.9587	1.33564	1.35007	1.39578	1.36021	0.497969	-0.182074
YDR449C	-1.37989	-1.51696	-2.29845	-1.61804	-1.02119	-2.0884	1.9179	1.44545
YDR458C	-1.00936	-1.36054	-0.2177	-0.435131	-0.46625	-0.436469	0.575421	0.0225929
YDR460W	1.60975	1.64501	1.12804	1.06215	1.34015	1.12531	1.10459	0.877352
YDR461C-A	2.76535	3.63874	1.984	1.96994	1.95243	2.24975	0.245219	0.282465
YDR461W	3.10845	2.93481	2.51991	1.91776	2.22206	2.14809	0.978116	0.823766
YDR463W	2.53551	2.78472	1.84617	1.83767	1.77609	2.0151	0.714874	0.603394
YDR465C	-1.96534	-2.49378	-2.09458	-2.21666	-2.1018	-2.59024	2.07056	1.62777
YDR466W	-1.6086	-1.19071	-1.50599	-1.60999	-1.47645	-1.29072	1.32581	0.390595
YDR467C	-0.967268	-2.00101	-0.614824	-2.4087	-0.869422	-0.757428	1.08146	0.966368
YDR469W	0.0409712	-0.253172	-0.855097	-0.83059	-0.49085	-0.255378	1.04007	1.0784
YDR471W	-0.497818	-0.82363	-0.150723	-0.243293	-0.0200186	-0.0905568	0.73411	0.364805
YDR475C	2.05229	1.99275	2.24522	2.10122	2.03287	2.09353	0.257209	-0.310191
YDR476C	2.00682	2.23211	1.69188	1.61991	1.5866	1.56965	0.267014	0.0727758
YDR480W	0.927945	1.41963	1.10208	0.73601	0.872401	0.38824	-0.0921536	-0.546269
YDR481C	2.32315	2.80904	1.57535	1.6728	1.37435	1.64216	0.714919	0.633277
YDR482C	1.92743	1.88484	1.70373	1.47698	1.52427	1.41114	1.02216	0.597055
YDR484W	-0.694782	-1.31267	-0.337118	-1.00435	-0.189153	-0.43572	0.437398	0.427237
YDR490C	1.99701	1.89401	0.820805	0.739394	0.63211	0.519623	0.0990138	-0.704948
YDR491C	2.4379	1.91031	2.33367	1.69921	2.1422	2.33837	0.641509	0.846257
YDR492W	2.25363	2.30332	1.98317	1.70169	1.93512	1.98479	0.73494	0.385455
YDR494W	1.51878	1.56015	0.543402	0.314718	0.575018	0.532124	0.64782	0.346293
YDR496C	-1.35416	-2.02663	-1.73709	-1.7607	-0.853599	-1.52663	1.92325	1.44925
YDR497C	0.5475	0.544386	0.184844	0.113909	0.186908	0.249717	1.44729	1.29737
YDR498C	-0.0978523	-0.448522	-0.302345	-0.796581	-0.713375	-0.767906	1.05422	0.694535
YDR499W	0.483853	0.488461	0.244455	-0.275726	-0.00318443	-0.130881	1.88107	1.68476
YDR501W	1.99854	1.79036	1.31279	0.942169	0.945782	1.30144	0.494038	0.166408
YDR505C	2.68928	2.92906	1.78354	1.63911	1.52166	1.63343	0.957284	0.555969
YDR508C	1.46375	1.67747	0.48275	0.299296	0.498083	0.416383	-0.94611	-1.58739
YDR509W	1.47222	1.88356	0.691849	0.881593	0.603987	0.583821	-0.985522	-1.20964
YDR510W	1.10361	1.02103	0.792509	0.798316	0.665944	0.882251	-0.45239	-0.80224
YDR511W	1.05007	1.30479	0.57363	0.521835	0.718575	0.479791	-0.344985	-0.806478
YDR512C	1.1111	1.40487	0.474877	0.450459	0.560891	0.447496	-0.300314	-0.770715
YDR513W	1.05436	1.14768	0.367788	0.224686	0.232915	0.260908	-0.57208	-0.929676
YDR516C	0.937319	1.14613	0.274431	0.240841	0.0890622	0.153665	-0.809431	-1.30616
YDR517W	1.56411	1.78868	1.17974	1.10697	0.935257	1.13412	-0.372755	-0.994828
YDR519W	-1.71568	-1.53209	-1.57545	-1.8063	-1.55591	-1.363	0.24827	-0.437342
YDR524C-B	0.968023	1.30609	0.487047	0.570785	0.494876	0.674808	-0.0396544	0.213744
YDR525W-A	2.35098	2.89305	1.74732	1.88059	1.69492	1.9818	0.656505	0.671444
YDR527W	2.22917	2.44753	1.9858	1.83884	1.99841	1.9054	0.448769	-0.0386706
YDR528W	1.96535	1.83009	2.32065	2.57229	1.89864	2.13227	-0.568331	-0.706605
YDR529C	1.52943	2.19928	0.8527	0.98899	0.786557	1.00778	-0.210861	-0.260399
YDR530C	2.16434	2.43851	1.58052	1.36535	1.34539	1.54313	0.0728292	-0.26855
YDR535C	5.1636	4.40574	4.70554	5.38455	5.50578	4.83606	-0.386657	-0.559278
YDR536W	4.02929	4.35998	3.69245	3.61077	3.8408	4.09883	-1.10347	-1.76876
YEL002C	-1.56201	-1.91117	-2.48473	-2.44365	-2.2453	-2.69434	0.315551	-0.156706
YEL003W	-0.622622	-1.05815	-1.71069	-2.75375	-2.4488	-1.83528	0.71875	0.536001
YEL006W	1.47222	1.54683	1.16778	1.12819	1.10154	1.07745	1.01554	0.853112
YEL009C	1.15975	1.48004	0.657568	0.663777	0.635347	0.75192	0.538701	0.565437
YEL011W	1.76503	2.26965	1.50959	1.58952	1.17723	1.45447	-0.417131	-0.815311
YEL012W	1.82928	2.57697	1.35586	1.42239	1.2449	1.45853	0.0763456	0.0654855
YEL013W	-1.48139	-1.93831	-2.22412	-2.7549	-2.61019	-3.15417	0.721105	0.052772
YEL015W	-0.471137	-0.654825	-0.571798	-0.898982	-0.774647	-0.614051	0.866994	0.384708
YEL019C	-1.569	-2.09813	-0.978594	-1.22649	-0.591135	-1.02259	1.68799	0.516266
YEL022W	-2.21607	-1.73429	-1.01419	-1.99651	-0.979249	-1.61402	0.188838	-0.339423
YEL023C	0.845196	0.625528	-0.449081	-0.733215	-0.433003	-0.753322	0.2122	0.0982111
YEL024W	1.49821	1.55177	0.845202	0.810799	0.791672	0.796695	-0.379323	-0.718527
YEL026W	-0.516537	-0.425175	-0.223895	-0.695254	-0.299755	-0.289002	1.1415	0.708074
YEL031W	0.224233	0.228976	-0.494895	-0.743522	-0.428521	-0.568382	1.42881	1.07099
YEL033W	1.46955	1.46111	0.360573	0.504958	0.540704	0.599684	0.24833	0.100465
YEL034C-A	1.2883	1.61895	0.443754	0.643428	0.403477	0.549054	0.164274	0.263599
YEL034W	1.12422	1.51126	0.528495	0.617175	0.475069	0.589805	-0.00340183	0.153866
YEL036C	1.66963	1.50858	0.683946	0.361063	0.756941	0.756423	0.478265	0.0747629
YEL038W	1.78945	2.17588	0.843469	0.888602	0.838283	0.954582	-0.516292	-1.52973
YEL039C	1.52196	2.12629	0.671153	0.754113	0.656791	0.813225	-0.993367	-1.48716
YEL040W	-1.58545	-2.09622	-2.00201	-2.28204	-1.93998	-2.2321	0.0912073	-0.461046
YEL042W	-0.817956	-0.689458	-0.758042	-1.09971	-0.862728	-1.39115	1.11184	0.584568
YEL043W	-0.379836	-0.214911	-0.192492	-0.807344	-0.468927	-0.519782	0.597543	0.340109
YEL044W	2.07811	2.51674	1.52705	1.51852	1.5537	1.72972	0.385138	0.272154
YEL047C	-1.33689	-1.65852	-2.5165	-2.8411	-2.67084	-2.70468	0.0994969	-0.270207
YEL053W-A	-0.558491	-0.658989	-0.869714	-1.19831	-0.899356	-1.00009	1.12782	1.40603
YEL054C	-0.443933	-0.884494	-0.658793	-0.82749	-0.758144	-1.05058	1.11495	1.19419
YEL058W	-0.106066	-0.475801	0.279451	0.12201	0.207675	0.0714601	0.775004	0.610089
YEL059C-A	1.28329	1.02676	0.0578061	-0.146859	0.141728	0.220135	0.531104	0.372892
YEL060C	1.51124	1.88629	0.911857	0.9553	0.817049	1.0129	0.334675	0.521896
YEL068C	-0.643892	-0.986274	-1.55859	-1.97804	-0.583976	-0.855589	0.656584	0.349827
YEL070W	1.55034	1.67741	-0.398315	-0.359297	-0.504637	-0.769736	-1.33989	-2.10462
YEL071W	1.89516	1.87368	1.45728	1.04714	1.26326	1.25149	0.0522487	-0.486763
YEL073C	1.29529	1.10237	0.763601	0.987573	0.678879	0.675775	-0.399893	-0.8959
YER001W	-1.80659	-2.19728	-2.1637	-2.29311	-1.39186	-1.23584	1.03042	0.475958
YER002W	1.40564	1.59089	0.437176	0.200785	0.296644	0.495599	0.961621	0.969742
YER003C	-1.47382	-1.55422	-2.08341	-2.55491	-2.16931	-2.49004	0.615413	0.354048
YER005W	0.815958	0.830201	0.737274	0.484388	0.492454	0.689314	0.0058368	-0.436537
YER006W	-1.86083	-1.89637	-1.64916	-2.49868	-1.7255	-1.70956	1.89167	1.42239
YER007C-A	-1.49712	-1.36574	-2.21944	-2.94346	-1.95757	-2.41303	0.185996	0.0233201
YER009W	-1.52845	-2.16819	-1.27132	-1.37822	-1.24243	-1.86133	0.511523	0.210403
YER012W	0.286182	0.0418665	-0.393939	-0.851047	-0.312959	-0.517805	1.15224	0.922028
YER014W	-1.05245	-1.8402	-1.9139	-1.59958	-1.54505	-1.60751	1.16845	0.852669
YER017C	2.76834	2.90567	1.00333	0.886795	0.933337	0.778993	0.513042	0.0427593
YER019C-A	1.14025	1.59784	0.782652	0.811371	0.916354	0.886303	0.322881	0.247676
YER020W	1.23427	1.41195	1.31963	1.37442	1.04857	1.1865	0.38097	0.436231
YER021W	0.756047	0.69101	-0.0641984	-0.173911	-0.0690305	-0.0973527	1.0457	0.959275
YER022W	-1.3077	-1.03503	-1.00016	-0.993471	-0.960489	-1.23127	1.43975	0.74688
YER023C-A	-0.833408	-0.83318	-1.1276	-1.64629	-0.980238	-1.31198	1.02765	0.762852
YER023W	-0.765464	-1.17505	-0.985873	-1.04859	-1.13601	-1.2281	1.43193	1.17697
YER024W	0.260614	0.163408	-0.252137	-0.241103	-0.0736285	-0.237557	2.44224	2.39609
YER027C	-0.240489	-0.470056	-0.272979	-0.250671	-0.232008	-0.314785	1.25278	1.03088
YER028C	-0.836089	-1.32604	-0.733637	-0.763558	-0.771639	-1.01941	1.87014	1.3693
YER032W	-1.0569	-0.841417	-1.98524	-2.31869	-2.00475	-2.06523	1.38067	0.587499
YER034W	2.04673	1.70475	1.34134	1.09715	1.2084	1.39605	0.628168	0.59315
YER035W	1.84705	2.35623	1.28357	1.40261	1.27689	1.51404	-0.00855246	0.0191178
YER036C	2.4873	2.87202	1.6844	1.56412	1.88638	1.79693	0.69233	0.55541
YER037W	1.13696	1.06905	0.35042	0.249787	0.637188	0.564557	0.132173	-0.0324367
YER043C	-1.92538	-2.55661	-2.01081	-2.1888	-1.80685	-2.18494	1.23313	1.05927
YER044C-A	-0.0195889	0.123642	-0.77969	-2.02351	-1.31297	-1.69123	-0.457088	-0.639005
YER048W-A	1.08165	1.16928	0.448344	0.47494	0.422594	0.644625	-0.443197	-0.722823
YER050C	1.66354	2.05924	0.971429	0.964374	0.966478	1.20586	0.546301	0.286944
YER053C-A	1.10625	1.41539	0.770771	0.92286	0.687885	0.830702	-0.231922	-0.0522848
YER054C	2.76146	3.18657	2.12356	2.07398	1.97721	2.23797	-0.618384	-1.08294
YER055C	1.55998	1.67885	1.28236	1.12438	1.25137	1.18524	0.112181	-0.398566
YER056C	1.45234	1.47234	1.22912	1.20378	1.45204	1.66024	0.559815	0.0775907
YER058W	1.15473	1.07771	1.6946	1.20126	1.33919	1.29526	-0.520157	-1.40712
YER061C	1.04551	1.04852	1.19035	1.22117	1.14284	1.3182	-0.523154	-1.19754
YER062C	1.70173	2.18035	1.44478	1.41175	1.34762	1.53743	-0.274093	-0.552572
YER063W	1.54069	1.64445	1.81544	1.63826	1.58834	1.67346	-0.0784426	-0.230439
YER064C	2.16101	2.34027	1.68782	1.66208	1.6322	1.85033	-0.352055	-0.871461
YER065C	0.454808	0.38114	0.483918	0.0526345	0.189806	0.116188	1.68886	2.00777
YER066C-A	1.71975	2.09787	1.38296	1.4445	1.40495	1.59597	-0.0463437	-0.383393
YER067C-A	1.15086	1.76229	0.519994	0.639615	0.363388	0.581094	-0.619693	-1.00256
YER067W	1.13052	1.82912	0.530962	0.634782	0.417216	0.701397	-0.590485	-0.750359
YER068C-A	1.82239	1.88424	1.12344	0.101886	-0.480472	0.197401	0.530066	0.385967
YER068W	2.45735	2.7428	1.6254	1.40732	1.65652	1.7758	0.810793	0.110336
YER072W	1.21622	1.323	1.27162	1.16197	1.10962	1.39831	-0.00531274	-0.114404
YER073W	-0.598696	-0.967428	-0.768141	-0.77609	-0.795538	-0.912528	2.78384	1.80186
YER074W	-0.0974679	-0.293969	-0.208868	-0.334401	-0.36804	-0.368283	0.586314	0.407714
YER074W-A	1.23484	1.26498	0.702043	0.466692	0.431268	0.713414	0.128365	-0.174274
YER079W	2.06277	2.48674	1.73311	1.66846	1.44528	1.54082	0.146851	0.0577918
YER082C	-0.986553	-1.23676	-1.32803	-1.31313	-0.86407	-1.124	1.17537	0.907617
YER084W	2.14681	1.92352	1.39494	1.00261	1.4804	1.70482	0.176252	-0.0591436
YER086W	-1.46479	-1.43569	-1.70221	-1.76219	-1.50434	-1.81944	1.42951	0.558854
YER088C	1.93376	2.1794	1.8642	1.85664	1.63163	1.94729	0.417236	0.482523
YER088C-A,YER089C	0.697738	0.603242	-0.00734654	0.0707581	0.211565	-0.124312	0.304609	0.194927
YER090W	-1.33222	-1.67884	-1.60971	-1.8253	-1.5622	-2.07692	0.802025	0.227002
YER091C	1.20242	1.31073	-0.905511	-1.18844	-0.828875	-0.850799	-0.0370211	-0.433453
YER092W	1.91258	2.24794	1.55416	1.55526	1.46162	1.84476	-0.157659	-0.337595
YER093C	1.42654	1.24815	0.531633	0.343495	0.341843	0.574846	0.445854	-0.00496584
YER095W	2.35895	2.6569	1.45774	1.47938	1.30536	1.54341	0.275879	0.201508
YER096W	2.50881	2.2247	1.98613	1.81624	2.03403	1.69139	0.68093	0.153207
YER097W,YER098W	1.74208	1.13599	0.752189	0.69597	0.581411	0.578637	-0.0449935	-0.166661
YER103W	1.99144	2.59911	1.82583	2.0596	1.73417	2.13522	-0.112125	-0.236243
YER104W	1.92314	1.96282	2.37034	2.39382	2.13658	2.48202	0.136818	-0.171094
YER106W	-1.02056	-1.45868	-1.31898	-1.72904	-1.22247	-0.68285	1.7603	0.71227
YER107W-A	0.0956095	-0.0398028	-1.22183	-1.49048	-1.0253	-1.09958	-0.9134	-0.875056
YER110C	-1.38097	-2.17516	-1.79706	-2.39203	-2.1355	-2.00187	1.02986	0.310993
YER111C	-1.11768	-1.02033	-1.66462	-1.8119	-1.53565	-1.80137	0.522707	0.030643
YER116C	1.80542	1.88673	1.47465	1.3807	1.36225	1.51351	-0.105591	-0.674805
YER117W	0.0411589	-0.107346	-0.288329	-0.170832	-0.304242	-0.292391	0.731535	0.592114
YER123W	-0.617332	-0.837995	-1.10483	-1.0361	-0.95721	-1.48704	0.533098	0.275913
YER125W	0.829685	0.761956	0.166655	0.0718478	0.0138677	0.247645	0.14212	-0.198464
YER126C	-2.91441	-4.2146	-2.80777	-3.90585	-2.95681	-2.8352	1.90338	1.59181
YER127W	-0.911068	-1.48876	-1.16532	-1.46646	-0.969653	-0.987185	2.27748	1.5679
YER131W	-1.46417	-2.35975	-1.95767	-2.08397	-1.77765	-1.88848	1.01338	1.21852
YER133W	1.49072	1.61534	0.942641	1.00902	1.00726	1.12844	-0.0270554	-0.148839
YER135C	1.34368	1.49527	-1.61092	-0.282215	0.279092	0.00327169	-1.58795	-2.03871
YER141W	1.89265	2.15011	1.69093	1.64747	1.42726	1.65106	0.364244	-0.0944596
YER145C	-0.0775306	-0.25523	0.347466	0.430237	0.185589	0.35823	0.82412	0.493448
YER146W	1.41803	1.55897	1.06323	1.13799	0.839726	0.98485	0.170466	-0.116001
YER147C	1.37512	1.01451	0.866381	0.487677	0.585633	0.508198	0.0730632	-0.401649
YER147C-A	2.13509	2.54667	1.69358	2.26354	1.401	1.74735	0.561624	0.077849
YER148W	2.1949	2.40667	1.71375	1.86522	1.73596	1.73981	0.868734	0.329348
YER149C	2.24583	2.34931	2.14115	1.72285	1.93014	2.06024	-0.64141	-1.51014
YER150W	1.56516	2.43761	1.21306	1.38252	1.05113	1.40094	-0.176713	0.0851644
YER156C	-1.97627	-2.19412	-0.35229	-0.736448	-0.520088	-0.700688	0.760897	0.461016
YER157W	-1.3932	-2.27143	-1.34947	-1.50281	-0.97003	-0.89739	0.865459	0.701649
YER158W-A	1.49771	2.2982	1.06514	0.934655	1.21508	1.70475	0.0581545	-0.215007
YER159C	1.38986	1.773	0.986138	1.08779	1.04526	1.08135	0.00421853	0.105147
YER162C	1.86632	1.94691	1.71962	1.4394	1.52759	1.79012	1.0307	0.77525
YER164W	-0.450545	-1.12319	-0.229723	-0.820512	-0.421896	-0.40977	0.809099	0.784125
YER165W	-0.125935	-0.412735	-0.624206	-0.759237	-0.706527	-0.752734	1.45118	0.95519
YER167W	-0.082658	-0.135203	0.675064	0.452356	0.544536	0.579823	1.57587	1.12763
YER169W	2.49862	2.71269	1.89892	1.67376	2.0725	1.91604	0.375511	0.0251961
YER171W	-0.707572	-0.957638	-1.66573	-2.79435	-1.78807	-1.93061	1.10261	0.476816
YER177W	0.593048	0.804153	0.222193	0.23989	0.128607	0.154167	-0.0194292	-0.119883
YER178W	0.942176	0.941516	0.111622	0.00364849	0.025547	-0.0267366	-0.0366394	-0.488345
YER180C	1.67797	1.69038	-0.0425893	0.00128617	0.440607	0.215593	0.302779	-0.205017
YER180C-A	2.04296	1.33325	1.20532	0.324738	0.793262	0.180217	-0.198868	-0.351405
YER182W	1.51662	1.80277	0.773109	0.453473	0.584202	0.677442	0.00703054	-0.419704
YER185W	-2.47674	-3.24413	-1.4742	-1.7845	-1.47084	-1.68487	2.0203	1.20352
YER186C	1.21625	1.39139	1.31781	1.28822	0.92355	1.25012	0.238282	-0.0748831
YFL007W	-0.579608	-0.790425	-0.628129	-0.839848	-0.659563	-0.783953	1.69689	1.44505
YFL008W	-0.0897634	-0.545325	-1.86911	-2.32787	-1.61927	-1.91267	1.42827	1.1513
YFL010W-A	0.200796	0.350782	-0.0252141	0.270466	0.216386	0.393256	0.87795	0.898943
YFL011W	0.891438	1.02474	0.178561	0.166034	0.12688	-0.48094	-0.645569	-1.32946
YFL013W-A	1.2047	1.19949	0.562975	0.819267	1.4023	1.11858	-0.140804	-0.388518
YFL015C	2.91798	3.07499	1.17608	0.910993	1.64649	0.513318	-0.505379	-2.33977
YFL016C	2.66827	3.31682	2.07286	2.13477	1.98384	2.35295	0.0851999	0.235307
YFL017C	1.00344	0.956512	0.674597	0.593031	0.677339	0.562388	-0.58108	-1.35202
YFL017W-A	1.33795	1.17893	1.23961	0.45478	0.924079	1.03122	0.0766498	0.0480621
YFL018C	0.98311	1.08937	0.312366	0.230431	0.330412	0.119274	0.00438132	-0.272239
YFL021C-A	3.46052	3.75085	2.98274	2.80685	2.56693	3.16552	-0.881747	-1.66338
YFL021W	2.73612	2.82479	1.53141	1.5452	1.57084	1.60077	1.59073	1.25411
YFL024C	2.64506	2.5777	2.59883	2.45475	2.57344	2.7258	0.975732	0.744884
YFL025C	-0.535674	-0.229974	-1.05863	-0.917428	-0.830939	-1.42491	0.500806	0.394579
YFL027C	-0.492996	-0.401083	-0.463763	-0.422612	-0.863629	0.10399	1.60786	0.92326
YFL030W	2.15989	2.41095	2.76779	2.71639	2.43411	2.66184	-0.374727	-0.817713
YFL031W,YFL032W	1.30418	1.80544	0.724843	0.878891	0.757363	0.979996	0.184345	0.166705
YFL034C-A	-0.828681	-0.862339	-0.744175	-0.87617	-0.0773662	-0.771735	0.977383	0.438312
YFL034C-B	-1.55209	-1.94238	-2.6471	-2.19222	-2.13269	-2.77648	0.616289	0.099859
YFL038C	1.33712	1.7363	0.772677	0.785385	0.712183	0.819235	0.194953	0.153661
YFL045C	-0.871525	-1.37377	-1.55427	-1.63415	-1.51403	-1.70385	1.05545	0.665688
YFL046W	-0.640366	-0.616676	-0.5263	-1.05529	-0.687788	-0.87447	1.27853	0.721514
YFL047W	-0.790718	-0.961485	-1.15053	-1.03035	-0.798797	-1.15269	0.689591	0.122855
YFL052W	0.870868	0.42146	0.207307	0.0752861	0.244234	-0.127665	-1.19762	-1.92613
YFL053W	0.947595	0.501388	0.575836	0.568127	0.55314	0.732782	-1.30321	-2.30465
YFL054C	1.49177	1.50906	1.04089	1.05348	0.986341	1.10005	-0.329332	-0.846014
YFL067W	1.6611	2.08502	-0.453462	-0.852229	-0.884543	-0.616136	0.588571	0.293002
YFR003C	1.25798	1.18855	0.337092	0.190738	0.249058	0.393528	0.0275419	-0.425127
YFR004W	1.23832	1.28843	0.41032	0.378153	0.520947	0.315361	0.801017	0.75869
YFR005C	-0.539526	-0.431187	-0.632639	-0.914767	-1.01015	-0.845968	0.643681	0.34615
YFR009W	-1.45514	-1.84252	-1.85603	-2.24821	-1.66434	-1.94575	0.646458	-0.0487894
YFR012W	0.277454	0.0266448	-1.91403	-1.12655	0.154148	-0.64494	-0.744081	-0.971795
YFR015C	0.665648	0.571593	0.395496	0.27045	0.0842675	0.036758	-0.900535	-1.57855
YFR017C	1.93403	2.15988	1.45014	1.39158	1.23242	1.33271	-0.242346	-0.26283
YFR023W	0.875052	0.729917	0.518338	-0.0471071	0.80352	0.433727	-1.46925	-1.3838
YFR029W	2.65729	2.54949	2.50336	2.1339	2.27228	2.4042	0.988025	0.60906
YFR030W	1.00621	1.01823	0.882669	0.679262	0.706837	0.849037	-0.814143	-1.44801
YFR031C	-2.5368	-2.99922	-2.079	-2.21407	-2.27378	-2.10498	0.492846	-0.355642
YFR031C-A	-0.960672	-1.66182	-0.695119	-0.793123	-0.760854	-0.732332	0.750133	0.799574
YFR032C-A	0.700167	0.809017	0.113369	0.428351	0.251416	0.257381	0.13474	0.294733
YFR033C	1.97621	2.30888	1.17083	1.31146	1.14379	1.30037	0.115537	0.301887
YFR034C	2.7956	2.15744	1.51196	1.53418	1.5366	1.63269	0.656116	0.484241
YFR037C	-0.97848	-1.49326	-1.03331	-1.28888	-1.19323	-1.42033	1.10183	0.522246
YFR039C	1.79276	2.06165	0.702645	0.648156	0.96929	0.788438	1.22292	0.965738
YFR040W	2.10539	2.21255	1.35618	1.17636	1.22727	1.34839	0.633431	0.199352
YFR041C	-1.23832	-1.28682	-1.42694	-2.11651	-1.71513	-2.24742	0.44748	0.509414
YFR044C	-2.20339	-2.42826	-2.40724	-2.73263	-2.37577	-2.36781	0.126904	-0.548626
YFR050C	1.44724	1.68412	0.507509	0.365576	0.515345	0.445254	0.873172	0.596737
YFR052C-A,YFR053C	1.05932	1.54132	0.674995	0.978424	0.714068	1.1043	-0.556082	-0.794478
YFR054C	1.86871	1.59872	-1.28937	-0.0935061	-0.437733	0.161328	-2.20281	-1.46519
YGL002W	2.12746	2.4487	1.37785	1.33921	1.38929	1.13697	0.557785	0.390972
YGL003C	3.01576	3.0069	1.97778	1.73602	1.88978	1.93307	0.531906	-0.0282119
YGL004C	2.31268	2.56494	2.04496	1.98631	1.75351	1.73055	0.497619	0.046553
YGL010W	2.49415	2.62109	1.41448	1.36304	1.35505	1.34564	0.182791	-0.301572
YGL011C	0.944342	1.09502	0.361056	0.182833	0.346209	0.163334	0.682073	0.637958
YGL016W	-1.71259	-1.03386	-2.33733	-2.58348	-2.24673	-2.51401	0.522458	0.515516
YGL018C	-0.64183	-1.17028	-0.529761	-0.536034	-0.6003	-0.578809	0.720683	0.417574
YGL020C	-1.25377	-1.52661	-1.62353	-2.26916	-2.09138	-1.83972	0.924469	0.162059
YGL025C	-0.341361	-1.14783	-0.024346	-0.273151	0.274355	0.0533278	1.88985	1.29177
YGL026C	-0.933051	-1.12942	-1.10162	-1.46096	-1.01846	-1.05715	1.18152	0.779452
YGL027C	-2.38754	-2.16113	-1.73473	-2.00746	-2.1378	-1.73413	1.15003	1.05995
YGL031C	-1.29753	-1.70638	-1.37652	-1.41217	-1.59142	-1.75336	0.771673	0.498811
YGL035C	2.78286	3.46289	2.5453	2.53695	2.36265	2.56994	0.218235	0.10138
YGL036W	2.20318	2.51567	1.72304	1.74786	1.59946	1.76693	0.134398	-0.156127
YGL037C	1.31464	1.98644	0.762521	1.00612	0.739079	1.07442	-0.173546	0.0421186
YGL040C	-1.0243	-1.19029	-0.984232	-1.1534	-1.0397	-1.398	0.519731	-0.0563668
YGL041C	1.1807	1.51044	0.818166	0.862175	1.0391	1.07136	-0.309092	-0.290427
YGL045W	2.20665	2.28736	2.30935	2.25294	2.19393	2.31518	0.762575	1.00107
YGL050W	2.34722	1.76705	2.15201	1.55166	1.82619	2.15991	-0.231925	-0.733939
YGL051W,YGL052W	1.67262	1.81169	1.43741	1.02474	1.5139	1.23735	0.305928	0.0981404
YGL053W	1.17684	1.20157	1.10081	0.752839	0.800499	0.857765	0.066189	-0.489484
YGL054C	1.65102	2.0521	0.852257	0.840265	0.916709	0.866238	0.0448974	-0.464485
YGL055W	0.447088	0.527436	0.086669	0.0041056	0.0658164	0.0218441	0.976945	1.13537
YGL058W	2.21387	2.47201	1.35304	1.64462	1.67976	1.55833	0.64366	0.404473
YGL062W	2.62673	3.12978	2.48719	2.60765	2.25007	2.57231	0.0931072	-0.249317
YGL063W	1.81198	1.65693	0.642411	0.695291	1.08743	0.660105	0.235178	-0.0396094
YGL065C	-2.52253	-2.89986	-2.46069	-3.32164	-2.40826	-2.32599	0.869937	0.195616
YGL066W	-0.447556	-0.677274	-0.973482	-1.02997	-0.727456	-0.509473	1.62505	0.977235
YGL069C	-0.388412	-0.0936727	0.641696	0.816189	0.24806	0.42917	1.181	0.857857
YGL076C	-0.576138	-0.799869	-0.732933	-0.871136	-0.789725	-0.791148	0.670916	0.383097
YGL077C	-1.40423	-1.63092	-1.69415	-1.95078	-1.50598	-1.93805	1.85081	1.29981
YGL078C	-1.16799	-2.03006	-1.57602	-1.85616	-1.58292	-1.61585	1.48704	0.842906
YGL080W	-0.0364949	-0.165643	-0.0882123	-0.229276	-0.078762	-0.12751	0.833084	0.831929
YGL092W	-1.88608	-2.6354	-2.19157	-2.35539	-2.19266	-2.02995	1.48207	1.01216
YGL093W	-0.0910931	0.273362	0.198046	-0.1006	-0.186246	0.1031	1.60284	1.19223
YGL094C	-0.156154	-0.362751	-0.49847	-0.668253	-0.535315	-0.516868	1.89118	1.22992
YGL098W	1.79009	1.87893	1.16927	1.12236	1.11453	1.28888	-0.419731	-0.936788
YGL105W	-1.37308	-1.72555	-2.16188	-2.00085	-1.91372	-2.09615	1.01424	0.446514
YGL108C	-1.5111	-0.982443	-1.77254	-1.71932	-1.16533	-1.4226	0.12514	0.0073721
YGL109W	-1.65091	-1.14481	-1.75838	-1.12942	-0.636941	-0.697397	0.91142	0.776131
YGL112C	-0.0443643	-0.266132	-0.389262	-0.506119	-0.410804	-0.583164	1.20099	0.765152
YGL116W	-1.26018	-1.36808	-2.93701	-2.80132	-2.51565	-3.21263	0.131034	-0.325353
YGL120C	-2.07581	-2.02446	-0.932232	-0.893861	-0.722756	-0.768873	1.02035	0.454473
YGL121C	1.09401	1.28279	1.11926	1.08301	1.07945	1.34317	-0.107502	-0.292873
YGL122C	1.37705	1.3781	0.980484	0.884758	0.75633	0.884289	0.774853	0.473607
YGL123W	0.720596	0.931931	0.299993	0.307391	0.264544	0.300188	0.23744	0.0680065
YGL125W	2.26049	2.5194	1.10352	1.02368	0.889438	0.793868	0.226975	0.0137814
YGL126W	1.0357	0.929389	1.08603	0.855933	0.961511	0.800581	0.413192	0.158582
YGL127C	3.22055	3.34722	2.91228	2.58437	2.48363	2.72855	-0.107788	-0.550859
YGL128C	1.31652	1.08227	1.79108	2.07866	1.49078	1.7762	-0.621988	-1.01612
YGL133W	-0.0633467	-0.478818	0.128686	-0.189228	0.211825	0.11036	1.6991	1.44994
YGL134W	2.13126	1.87886	2.44449	2.52627	2.53586	2.43182	1.19309	1.01866
YGL137W	-1.23889	-1.60338	-1.30055	-1.68678	-1.37331	-1.44327	0.664005	0.134341
YGL146C	3.21954	2.85233	2.43016	2.95883	2.72326	2.42661	0.877423	0.411803
YGL147C	-1.165	-1.45193	-1.28094	-1.54164	-1.11801	-1.68023	1.38044	1.0077
YGL148W	-0.813348	-1.47679	-0.301919	-0.866621	-0.453365	-0.688749	1.57105	1.29576
YGL151W	-0.933198	-1.47618	-0.918213	-1.17528	-0.833071	-0.652869	0.993255	0.734846
YGL152C	-0.237424	-0.335638	-0.750627	-0.800865	-0.502765	-0.381061	1.60692	1.07475
YGL155W	-0.135128	-0.616804	-0.457264	-0.633289	-0.376686	-1.01836	1.01849	0.998133
YGL162W	3.38127	3.44773	2.51076	2.5379	2.37482	2.41662	-1.54245	-2.5445
YGL163C	2.96387	3.19773	1.96104	1.82452	1.90983	1.98904	0.365013	-0.177195
YGL165C	2.35909	2.90885	2.24873	2.39601	2.01874	2.32715	0.583701	0.766316
YGL166W	2.68721	3.11026	2.29986	2.33573	2.21191	2.55172	0.445104	0.72304
YGL171W	-2.62302	-2.29198	-2.71543	-2.42427	-3.09129	-2.71115	1.8341	2.32512
YGL173C	-0.796884	-1.01464	-1.23167	-1.89582	-1.60753	-1.63672	1.00725	0.393146
YGL181W	1.8918	1.74828	1.47037	1.3333	1.27037	1.28307	0.83321	0.611345
YGL182C,YGL183C	2.12966	1.95707	2.36599	1.89578	1.76283	2.04371	1.08758	0.960675
YGL184C	4.01206	4.3013	3.41507	3.69591	3.75049	3.73415	0.568712	0.201763
YGL187C	1.43266	1.49586	0.831237	0.904267	0.761266	0.784478	-0.266519	-0.603815
YGL189C	0.640419	0.760414	0.299005	0.297878	0.157256	0.273316	0.153542	0.254821
YGL190C	1.49944	1.37695	0.893318	0.770586	0.712721	0.677821	0.604881	0.206865
YGL191W	1.60942	2.25968	0.86013	0.928886	0.797917	1.07855	-0.0229292	-0.0905953
YGL192W	2.51535	2.77657	1.82438	1.55688	1.51213	1.70196	0.639013	0.27245
YGL193C	3.1304	3.13089	1.23662	1.59499	1.52195	1.85165	1.06029	0.509728
YGL196W	-0.222086	-0.635696	-0.196144	-0.722712	-0.188976	-0.399825	1.68191	1.349
YGL197W	0.348441	0.281095	0.0511514	-0.0926327	-0.249146	-0.0575709	1.43201	1.0396
YGL198W	0.980942	1.19165	0.256911	0.0980699	0.110911	0.0858222	0.253277	-0.158075
YGL203C	1.17732	1.14472	0.30775	0.209016	0.217472	0.274012	-0.10733	-0.610359
YGL205W	3.5567	3.81721	2.43967	2.34402	2.84087	2.85207	0.97851	0.775629
YGL207W	-0.605485	-0.577029	-1.06944	-1.2884	-1.02241	-1.06821	1.57858	1.10258
YGL213C	-1.59412	-1.60123	-1.79624	-1.75274	-1.56861	-1.53429	0.825073	0.237764
YGL218W	2.33967	2.60319	1.61503	1.39859	1.59891	1.54442	0.599988	0.233261
YGL219C	2.33353	2.58666	1.45019	1.40281	1.32717	1.30309	0.694683	0.29268
YGL220W	1.17106	1.36435	0.392143	0.517307	0.505661	0.578825	0.345044	0.204282
YGL228W	1.72408	1.90522	0.851992	0.779167	0.717891	0.859205	0.397263	-0.0625334
YGL229C	0.976814	0.665219	-0.286207	-0.156168	-0.1079	-0.0819133	-2.09754	-2.47875
YGL231C	-1.66262	-1.63893	-2.66041	-2.7663	-2.45089	-3.21753	-0.741906	-0.992578
YGL234W	-1.68868	-1.94555	-1.79228	-1.97732	-1.66053	-1.93758	0.385736	-0.136498
YGL238W	-0.678705	-1.05953	-1.41572	-1.99301	-1.48919	-1.66152	1.2445	0.558002
YGL245W	-1.92905	-2.83598	-2.66964	-2.70867	-2.61254	-2.83174	1.30907	0.865508
YGL246C	-0.489317	-0.947834	-0.76722	-1.01087	-0.749826	-1.3371	1.07053	0.829973
YGL248W	0.903638	1.03325	0.60935	0.641404	0.540859	0.529944	-0.67158	-1.26194
YGL252C	1.38514	1.31548	0.820085	0.647094	0.81167	0.794134	0.915469	0.689175
YGL253W	-1.93112	-2.00043	-1.85438	-2.15732	-1.83002	-2.12442	-0.380983	-0.834507
YGL255W	2.34453	2.86568	1.41434	1.39995	1.50368	1.72981	-0.950065	-1.54535
YGL256W	0.293488	-0.00856828	-0.562013	-0.628072	-0.659202	-0.572155	-2.20345	-3.08808
YGL259W	0.836437	0.491829	-0.757892	-0.565795	-0.249293	-0.390991	-2.12057	-2.07139
YGL262W	1.36495	0.860885	-1.23026	-1.12056	-0.489034	-0.841151	-0.822513	-0.877007
YGR002C	1.6999	1.80485	0.873763	0.494054	0.775634	0.709892	0.586882	0.126052
YGR008C	1.08869	1.59675	0.579125	0.787281	0.541175	0.736768	-0.254374	-0.233322
YGR009C	1.77843	1.98445	1.51783	1.37735	1.50041	1.48039	0.99632	0.598642
YGR017W	-1.13107	-1.09125	-0.892546	-1.55179	-1.24528	-1.93755	0.728854	0.473463
YGR018C	-0.807667	-1.34316	-1.47026	-1.62152	-1.42536	-1.9132	0.506783	0.413818
YGR019W	0.97612	1.04626	0.901794	0.622359	0.697423	0.690452	0.172193	-0.116014
YGR021W	1.05799	1.03256	1.13347	0.90195	0.971287	1.08227	-0.312316	-0.676354
YGR023W	1.81785	2.01018	1.80969	1.84907	1.5892	1.77106	-0.434924	-1.07904
YGR024C	1.36675	1.56341	0.681649	0.779201	0.669443	0.770829	0.132465	-0.182337
YGR028W	1.74952	1.99713	1.36753	1.24504	1.38689	1.22419	0.179768	-0.349749
YGR029W	1.53363	1.77393	0.962718	0.968211	1.13945	0.987552	0.413481	-0.108337
YGR030C	1.3718	1.55423	0.741952	0.884693	0.847877	1.00266	0.360104	0.181014
YGR031C-A	2.02599	2.09236	1.829	1.59182	1.69274	1.54278	0.240829	-0.223342
YGR031W	1.83444	1.98497	1.86141	1.36824	1.4283	1.5913	0.453376	-0.0757352
YGR035W-A	0.199312	0.760641	-1.36574	-1.96069	-1.2184	0.355092	-0.946102	-1.45535
YGR037C	-0.744408	-0.920707	-0.205653	-0.193336	-0.385767	-0.334258	0.241501	0.137561
YGR043C	1.98612	2.62849	1.52047	1.56424	1.29884	1.51308	-0.220397	-0.235943
YGR044C	0.806632	0.750464	0.671358	0.371822	0.386482	0.483699	0.0489786	-0.264752
YGR046W	2.68799	2.96368	2.00126	1.96752	1.91195	2.15381	0.740458	0.555343
YGR048W	1.87721	1.97098	0.777679	0.517602	0.556331	0.7324	0.824658	0.569765
YGR050C	2.02986	1.99158	1.58992	1.67496	0.984141	1.02762	-0.17732	-0.808839
YGR051C	2.19247	2.3376	1.86089	2.1788	1.67445	2.16315	-0.555015	-1.11678
YGR053C	1.23945	1.49007	1.71745	1.33212	1.40162	1.3675	0.100457	-0.350465
YGR055W	3.10521	3.76948	2.8728	2.89851	2.8559	3.20131	-0.436396	-0.849961
YGR057C	1.43238	1.59221	1.10847	0.980124	1.22389	1.28507	0.859729	0.774948
YGR059W	-0.164308	-0.101445	-0.749114	-0.913372	-0.592419	-0.739207	-1.74016	-2.05198
YGR060W	-1.35351	-1.7162	-2.21102	-2.14915	-2.33345	-2.28325	1.4102	1.21182
YGR061C	-2.18617	-2.72644	-2.58251	-2.62137	-2.35797	-2.53898	1.07626	0.397217
YGR064W	1.36098	1.35642	0.93991	0.735866	0.799086	1.03416	-0.131797	-0.071713
YGR066C	2.00048	1.71054	1.22052	1.4632	1.1933	1.37664	-1.35353	-2.29441
YGR067C	2.50479	2.30777	1.57114	1.20757	1.56863	1.26929	-0.838008	-1.40574
YGR070W	0.381395	0.217839	0.675078	0.581898	0.751215	0.70102	-0.99133	-1.72096
YGR072W	-0.658662	-1.06022	-1.55109	-2.23852	-1.51316	-2.19118	0.963481	0.545402
YGR075C	-1.35675	-1.01056	-0.476111	-0.693813	-0.253008	-0.716642	0.427895	0.524066
YGR078C	-1.41918	-1.39681	-1.18888	-1.602	-0.935847	-1.4574	0.372555	0.178819
YGR085C	-0.0945925	-0.169665	0.0408587	-0.0123666	0.233865	-0.104536	0.719919	0.578657
YGR086C	1.41445	1.8208	0.85341	0.975534	0.776319	1.01417	0.0860849	0.208785
YGR088W	1.87089	2.16076	0.543418	0.4819	0.288771	0.312446	-0.516	-0.841647
YGR089W	-0.35076	-0.239076	-1.57735	-1.49548	-1.04677	-1.21609	0.922751	0.486427
YGR090W	-0.977651	-0.913726	-1.77364	-1.99463	-1.34098	-1.28228	0.989937	0.334156
YGR093W	2.05442	1.84203	1.13689	1.10478	1.0513	1.35868	0.431256	0.0528496
YGR094W	-1.53402	-1.77881	-1.48165	-1.87618	-1.46017	-1.62398	0.749449	0.334049
YGR096W	0.79447	1.1366	1.50464	0.935524	1.36001	1.017	-1.53376	-2.32303
YGR099W	-0.387256	-0.0897586	-0.0970627	-0.417331	-0.0333952	-0.0100609	1.72414	1.16814
YGR101W	-0.660057	-0.963889	-0.575022	-0.563661	-0.477468	-0.710937	1.28624	1.33192
YGR102C	1.97214	2.02584	1.42985	1.15054	1.34699	1.32703	0.0778094	-0.230806
YGR103W	-1.65786	-2.05969	-1.74155	-2.13194	-1.44625	-2.25676	1.70011	0.853748
YGR109C	0.343516	0.489397	0.247203	0.359792	0.136063	-0.0984334	-0.471714	-0.290573
YGR110W	2.76384	2.76262	2.57781	2.4115	2.37245	2.39252	1.18997	0.954014
YGR113W	-1.39439	-1.35172	-1.57518	-2.22546	-1.66872	-2.19662	0.871039	0.142704
YGR116W	-0.452663	-0.377607	-0.412804	-0.76253	-0.650141	-0.621808	0.888207	0.406931
YGR118W	0.0697138	0.0818677	0.174055	0.172268	0.279658	0.258181	0.465769	0.638881
YGR121C	2.24162	2.21553	1.9453	1.75361	1.81098	1.67436	1.23696	1.17521
YGR122W	1.67158	1.63517	0.606017	0.364691	0.229304	0.428976	0.901842	0.747644
YGR124W	0.942435	0.975721	0.548117	0.508345	0.509256	0.562635	2.05255	1.84741
YGR127W	0.0530201	0.0666106	-0.863632	-1.27492	-0.938866	-1.42583	-0.87191	-1.36124
YGR128C	-2.23358	-1.66815	-2.63595	-2.82748	-2.01886	-1.91205	1.38541	0.652548
YGR130C	1.11419	1.21638	0.592651	0.408118	0.335317	0.31568	0.35297	0.102346
YGR132C	1.41546	1.45676	0.838861	0.792206	0.790736	0.863462	0.206869	-0.00190953
YGR135W	-0.0548508	-0.280413	-0.399833	-0.548223	-0.309579	-0.397524	0.696318	0.602578
YGR141W	1.23108	1.33902	1.10946	1.05575	1.03283	0.973972	0.112954	-0.245926
YGR142W	1.88326	2.59654	1.40186	1.59958	1.45214	1.77399	-0.0240886	0.351667
YGR143W	1.98086	2.08005	1.52046	1.38485	1.49583	1.47051	0.29566	-0.294857
YGR145W	-2.00149	-2.71437	-1.29812	-1.96755	-1.03586	-1.29475	0.900089	0.630524
YGR146C	1.01689	1.0138	0.30215	0.15733	0.295356	0.173482	-0.727787	-1.17634
YGR147C	1.97253	2.40868	1.81148	1.8219	1.66517	2.06706	0.166049	-0.0513195
YGR151C,YGR152C	-1.08953	-1.50618	-1.49136	-1.56335	-0.861342	-1.32442	1.8549	1.04974
YGR154C	1.54575	1.58044	1.15048	0.876856	1.11546	1.10803	-0.0313319	-0.748701
YGR158C	-1.4489	-1.69599	-2.8536	-1.9494	-2.44277	-2.79461	1.447	0.677977
YGR161C	1.66625	2.10607	1.0891	1.09032	0.959297	1.22475	0.0754727	0.329432
YGR161W-C	2.73186	3.21053	2.29046	2.55209	2.21681	2.48684	0.190728	0.478734
YGR162W	-0.418979	-0.650866	-0.276155	-0.697513	-0.271019	-0.529661	1.49785	1.27613
YGR169C-A	0.936536	0.908107	0.824875	0.91747	0.776182	0.904256	-0.342288	-0.435974
YGR170W	-0.275871	-0.377454	-0.623724	-1.03649	-0.816833	-1.06154	0.518055	0.444642
YGR172C	-0.46604	-0.393981	-1.57374	-1.46797	-1.45736	-2.00469	0.113727	-0.0213458
YGR173W	-1.3885	-1.21965	-2.90814	-3.08218	-2.28055	-2.15647	1.38298	0.53741
YGR174C	1.27941	1.50154	0.487806	0.397668	0.609165	0.483247	0.0890596	-0.328449
YGR175C	-0.689362	-0.787987	-0.371604	-0.572265	-0.464695	-0.610644	0.437564	0.183392
YGR179C	-0.0895947	-0.185077	-0.431693	-0.962371	-0.175682	-0.679124	0.946328	0.949469
YGR180C	0.309271	0.262939	-0.159824	-0.35229	-0.264564	-0.286416	0.0961515	0.142705
YGR182C	1.88539	2.01484	1.21497	1.54597	1.14241	1.23018	0.00477036	-0.0906961
YGR183C	1.40728	2.05222	0.865844	0.985585	0.697663	0.949809	-0.18742	-0.29746
YGR185C	-1.91448	-2.2658	-2.70543	-3.06744	-2.6902	-2.72103	0.279272	0.391162
YGR189C	-1.09688	-1.74742	-1.91869	-2.20689	-2.06656	-2.47894	1.03124	0.846947
YGR194C	0.114324	-0.118805	0.365054	0.248409	0.337095	0.0807504	-1.47502	-2.00726
YGR197C	2.06518	1.91345	1.85153	1.55081	1.82965	1.61628	1.38812	1.16486
YGR200C	-1.87313	-2.79326	-2.47377	-3.02046	-2.4039	-2.96627	1.49138	1.05502
YGR201C	1.5448	1.55756	1.50768	1.35108	1.26016	1.5328	-0.0836526	-0.289305
YGR202C	1.32925	1.50824	1.56576	1.29797	1.48679	1.35436	-0.0238285	-0.407935
YGR203W	1.58811	1.95242	0.928228	1.07837	0.784715	1.09509	0.110933	0.231753
YGR205W	-1.70419	-1.9157	-1.99445	-2.11296	-2.25399	-2.46063	0.528104	-0.251021
YGR208W	-2.17014	-2.25346	-2.59755	-1.89476	-1.46174	-1.49986	0.634588	-0.0868959
YGR209C	1.13049	1.63747	0.640754	0.678408	0.59738	0.741752	-0.233765	-0.206829
YGR210C	1.61179	1.71991	1.54911	1.35812	1.55622	1.60648	0.0354199	-0.307563
YGR211W	1.85583	2.2015	1.27582	1.26624	1.40065	1.49556	0.291923	0.332232
YGR213C	-1.33733	-1.2458	-0.903706	-1.09044	-0.658718	-1.27591	0.157789	-0.37869
YGR214W	-0.553055	-1.00818	-0.570379	-0.889995	-0.68778	-0.898663	0.985176	0.864274
YGR217W	-1.47214	-1.82835	-1.50788	-1.63528	-1.7321	-1.58711	0.840865	0.183552
YGR224W	1.34571	1.0079	-0.075325	-0.470223	0.145217	-0.183667	-0.303371	-0.79243
YGR227W	-1.82516	-2.9257	-1.55954	-2.0445	-1.61652	-2.33857	1.43752	0.640553
YGR230W	1.29782	1.09134	0.231999	-0.0452617	0.0253149	0.0110726	-0.454781	-0.883102
YGR236C	3.03171	3.62274	2.2549	2.53924	1.63287	2.0102	0.00614977	0.345364
YGR239C	-0.952967	-1.42958	-0.449776	-0.46713	-0.470711	-0.377177	1.39897	1.19994
YGR241C	1.52107	1.40157	0.846967	0.608656	0.679352	0.725065	-1.36077	-1.89811
YGR242W	1.38065	1.75032	0.988742	0.457014	1.128	0.811062	-1.61389	-2.21683
YGR243W	2.79918	3.83117	1.6859	1.88678	1.42539	1.78267	-0.185408	0.0593286
YGR248W	0.454948	0.421885	0.225966	0.00750813	0.0294899	0.000113368	-1.30414	-2.05506
YGR249W	0.259769	0.0639276	-0.131241	0.0925577	-0.279824	-0.382011	-2.41519	-3.41045
YGR250C	1.80727	2.1052	1.41127	1.40294	1.35951	1.53368	0.251951	0.23489
YGR251W	-1.00753	-1.48211	-0.664054	-0.394318	-0.73857	-0.492615	0.212604	0.00823871
YGR256W	0.691544	0.600846	-0.365767	-0.566863	-0.822286	-0.725353	-0.958643	-1.82537
YGR265W	-0.180528	-0.244339	0.82452	0.317551	1.48324	0.931578	1.02277	1.03708
YGR269W	3.91376	4.17421	4.12957	3.22762	4.22869	3.92808	0.577329	0.492522
YGR270W	1.64113	1.64849	1.33794	1.18536	1.28506	1.34221	0.706017	0.234253
YGR271W	-1.16227	-1.15952	-2.244	-2.6313	-2.14006	-2.30833	0.744996	0.224727
YGR275W	1.05365	1.02938	-0.0490433	-0.621359	0.110749	-0.132572	0.655244	0.487442
YGR277C	-1.21713	-0.878614	-1.25128	-1.80418	-0.918449	-0.763045	0.705175	0.77934
YGR278W	-1.57999	-1.26687	-2.16624	-2.90818	-2.27393	-2.05238	1.0004	0.489768
YGR280C	-0.118476	-0.300838	0.756711	0.496479	0.638838	0.522627	0.34613	0.448712
YGR281W	-0.253208	-0.478532	-0.61372	-1.12694	-0.619401	-0.681363	1.04734	0.781904
YGR282C	0.941463	1.21787	0.243955	0.256767	0.226372	0.274345	0.106349	0.187576
YGR284C	0.681768	0.790071	0.524189	0.432864	0.517374	0.527596	0.350629	0.191375
YGR285C	-1.2766	-1.79607	-1.30173	-1.4709	-1.28254	-1.37022	0.794224	0.215969
YGR287C	0.140523	0.181625	-0.382922	-0.438435	-0.352289	-0.790506	-0.419588	-0.748341
YGR295C	-0.947013	-1.44953	-1.69416	-1.89582	-1.60589	-1.77475	0.502106	0.301298
YHL008C	3.12772	3.18586	2.40335	2.3383	2.37537	2.55202	0.0075955	-0.470164
YHL010C	-1.17879	-1.1069	-1.43236	-1.59216	-1.49199	-1.53786	1.44215	0.851664
YHL011C	-0.755288	-0.998376	-0.762242	-1.10114	-0.853608	-0.647689	1.31718	0.868711
YHL012W	0.464148	0.434533	0.30266	0.650051	0.0108309	-0.251477	-1.28542	-1.98111
YHL013C	-0.91631	-1.51988	-0.992269	-1.02446	-0.579746	-0.264818	1.91354	1.31505
YHL016C	2.32842	2.36385	0.923482	0.563858	0.877394	1.0086	1.17977	0.489573
YHL018W	-1.69633	-0.873013	-1.64708	-1.41838	-1.20307	-1.849	0.800713	1.29079
YHL021C	1.41612	1.97043	0.625345	0.730559	0.504185	0.589224	-0.273378	-0.580279
YHL022C	0.984258	0.777834	-0.240441	-0.410182	0.0109297	-0.615706	-0.51968	-1.00004
YHL025W	1.92099	1.96281	1.68355	1.62265	1.457	1.74604	0.554953	0.207703
YHL027W	2.05656	2.26628	1.63068	1.56579	1.70531	1.75646	1.04427	0.797025
YHL030W	-1.13928	-1.87379	-1.97213	-2.10569	-1.98736	-2.04484	1.35102	0.627388
YHL033C	-2.06873	-2.53362	-0.755669	-0.994209	-0.819471	-1.08143	1.61091	1.71715
YHL034C	-0.428647	-0.523006	-0.738679	-0.921799	-0.834593	-1.07279	0.205574	0.0368505
YHL036W	1.68607	1.64227	0.946403	0.975076	1.17072	1.35435	-0.513439	-1.19425
YHL038C	-0.319541	-0.16013	-1.50543	-1.20981	-0.829102	-1.13916	0.550512	0.312955
YHL039W	-0.855944	-0.639221	-0.807102	-1.44656	-0.773893	-1.20342	1.06655	0.698184
YHL050C	0.953548	0.884977	-0.0413704	-0.424931	-0.0601006	-0.0787818	-0.00419023	-0.198583
YHR001W-A	1.75183	2.33503	1.11187	1.35322	0.991694	1.32842	-0.371058	-0.833259
YHR002W	2.17879	2.38525	1.88401	1.36725	1.56189	1.52933	-0.381043	-0.893136
YHR006W	1.77487	2.00374	1.36511	1.32187	1.29006	1.29512	0.78749	0.458251
YHR007C	-1.49767	-2.03746	-2.26397	-2.68398	-2.33313	-2.49888	0.664356	0.526564
YHR009C	1.53457	1.54187	0.829867	0.679085	0.789271	0.786435	0.152958	-0.325475
YHR013C	-2.22137	-1.83177	-3.24497	-3.08015	-2.37679	-2.86837	0.524859	0.402072
YHR016C	0.696326	0.592199	0.290901	0.204324	0.14572	0.15595	-0.629275	-0.948428
YHR017W	1.74599	1.60608	0.911492	0.859686	0.819839	0.867011	0.227177	-0.456723
YHR018C	-0.775555	-1.06953	-0.0361234	-0.322552	0.113324	0.0884928	1.43526	0.97717
YHR019C	-1.11604	-1.61511	-1.57977	-1.73302	-1.59823	-1.70521	0.780225	0.178377
YHR022C	-0.634914	-0.664808	-0.481229	-0.65218	-0.940103	-0.22476	-1.84018	-2.11552
YHR024C	-0.851017	-0.999868	-0.769152	-0.903676	-1.00905	-1.27598	1.09224	0.665529
YHR025W	-1.51649	-2.11264	-1.42911	-1.41826	-1.53932	-1.50084	1.16009	0.433822
YHR029C	-1.37325	-2.10506	-0.392147	-0.633518	-0.772668	-0.508605	0.573233	0.394359
YHR031C	1.30313	1.37592	0.853281	0.734358	0.992828	0.932581	-0.216686	-0.633553
YHR032W	0.856895	0.800689	0.0503322	-0.164054	0.147039	0.155121	-0.193174	-0.691909
YHR032W-A	0.532327	0.671992	-0.746391	-0.990352	0.764647	0.013293	-0.427974	-0.831925
YHR033W	5.52914	6.27856	3.41324	3.35881	3.25325	3.7068	-0.364493	-0.541864
YHR039C	-1.3574	-1.83119	-2.82793	-3.15632	-3.23801	-3.11262	1.24088	0.367914
YHR044C	0.147473	0.45908	-0.405546	-0.474382	0.0755534	0.126165	-1.47133	-1.89083
YHR047C	-1.05677	-1.65546	-1.11256	-1.42098	-1.28842	-1.21814	1.28421	0.807408
YHR048W	1.71473	1.67418	1.44805	1.17925	1.18704	1.22213	0.380891	0.0105077
YHR049C-A	4.53448	4.08415	3.58025	3.08627	3.32998	3.32703	1.78395	1.4476
YHR050W	2.24074	2.41238	1.50891	1.19146	1.26895	1.35301	0.723339	0.33107
YHR051W	0.745065	0.715753	0.136138	-0.034674	0.118991	0.0978974	-0.219712	-0.71664
YHR052W	-1.05515	-1.24009	-1.00446	-0.939673	-0.549985	-1.5279	1.31096	0.780122
YHR058C	0.352959	0.11803	-0.275731	-0.26622	-0.182202	-0.248275	1.32245	1.26969
YHR062C	-1.4129	-1.65105	-2.49829	-2.59495	-2.0733	-1.91518	1.58274	0.871599
YHR063C	-2.32065	-3.02236	-3.25155	-3.29882	-2.29379	-2.56966	0.0821179	-0.0227079
YHR064C	-0.672861	-0.902	-1.46186	-1.69308	-1.5685	-1.68315	1.11126	0.68079
YHR065C	-2.40582	-2.65482	-3.49793	-3.39753	-3.02439	-3.91666	0.970325	0.388468
YHR066W	-1.61019	-1.40653	-1.25585	-1.28365	-1.23269	-1.47402	1.84268	1.50672
YHR068W	-2.39089	-3.35103	-2.11281	-2.50646	-2.13591	-2.27503	0.525821	-0.229076
YHR070C-A	-1.10309	-0.752985	-0.230364	-0.527314	-0.395961	-0.388246	0.87649	0.568909
YHR071W	1.52611	2.03062	1.31366	1.35989	1.41376	1.567	-0.058457	-0.292527
YHR072W-A	0.741157	0.90396	0.49425	0.514373	0.529994	0.624886	0.0774849	0.0672716
YHR073W	-0.671889	-0.735706	-0.771022	-1.06548	-1.04229	-1.0064	1.20081	0.567457
YHR076W	-1.28843	-1.39291	-0.856326	-1.11835	-1.19395	-1.33102	0.909806	0.4681
YHR078W	1.6912	1.82634	0.892378	0.689207	1.0173	0.954136	0.457736	-0.196926
YHR079C	-0.750073	-0.8156	0.0297326	0.0279627	-0.145345	-0.113487	1.32118	0.856978
YHR082C	1.88673	2.14971	1.55149	1.32354	1.38102	1.39443	0.507912	0.227471
YHR085W	-0.595434	-0.4617	-0.878035	-1.26285	-0.546916	-0.578917	1.29841	0.752651
YHR087W	1.39214	1.8805	1.12836	1.33548	1.05424	1.3433	-0.194656	-0.0427616
YHR088W	-1.1538	-0.862259	-1.0746	-1.53408	-0.703888	-0.88495	0.879934	0.668009
YHR096C	3.49727	4.26954	3.29367	3.43785	2.91016	3.41002	0.130797	0.350441
YHR097C	1.67909	2.23721	1.22334	1.34252	1.04688	1.30433	0.184536	0.415908
YHR099W	2.58095	2.49336	-0.0390205	-0.377243	-0.126922	-0.139755	1.06529	0.400325
YHR104W	0.367088	0.442841	0.140136	0.05559	0.119481	0.0436075	-1.44766	-2.06466
YHR105W	0.266842	0.482878	0.295566	0.337862	0.352948	0.618805	-0.741466	-1.13903
YHR108W	-1.64811	-1.74433	-1.85166	-2.47288	-2.28952	-2.5653	0.751136	0.201609
YHR118C	-1.11183	-1.34202	-1.21226	-0.968257	-0.902507	-0.787202	1.85255	1.14661
YHR119W	-0.163747	-0.406262	-0.538362	-0.66604	-0.0555444	-0.524301	1.49175	1.16777
YHR120W	-0.587544	-0.940735	-1.59058	-1.91189	-1.62296	-1.48672	0.924981	0.736495
YHR123W	-1.42978	-1.88768	-1.75001	-2.03851	-1.63244	-2.14579	0.841372	0.282633
YHR127W	-1.2802	-1.05528	-1.66137	-2.25441	-1.69802	-1.91429	1.93898	1.91094
YHR128W	-2.20602	-1.29501	-1.99227	-2.10026	-2.40349	-1.69672	1.93537	1.36942
YHR129C	-1.74848	-1.37685	-0.810931	-1.6146	-1.30122	-1.22052	1.79305	1.25327
YHR136C	2.98374	2.86435	2.82407	2.99946	2.87002	2.97216	1.0634	0.806414
YHR137C-A	4.85575	5.12679	3.67497	3.47585	3.30152	3.89195	1.11553	1.38181
YHR137W	4.30015	5.16253	3.16994	3.38601	3.30742	3.54335	1.25817	1.39908
YHR138C	1.09592	1.47315	0.65332	0.751814	0.65335	0.862951	0.0165531	0.358928
YHR139C	1.8857	1.89628	1.65676	1.61183	1.30876	1.33716	0.484388	0.404239
YHR139C-A	1.43327	1.17489	2.01345	2.41888	1.89147	2.71564	-0.115754	-0.334415
YHR141C	0.302928	0.314654	0.0971532	0.15074	0.0701304	-0.00306804	0.393287	0.410123
YHR146W	1.6088	2.10639	1.14194	1.23256	1.06092	1.234	0.563291	0.730993
YHR150W	2.50146	2.29746	1.98047	1.55899	1.88762	2.09965	1.45494	1.23287
YHR155W	-1.54771	-2.06193	-2.17594	-2.18973	-2.08742	-2.03938	0.849034	0.199285
YHR156C	2.50113	2.7614	1.22481	0.785737	1.17442	1.08062	1.91197	1.88385
YHR158C	-1.02509	-1.03226	-0.280585	-0.609804	-0.263953	-0.448471	1.82319	0.941131
YHR160C	2.91617	3.02317	2.18031	1.44566	1.94988	1.99256	0.541556	0.420698
YHR161C	2.17642	2.4443	1.63954	1.62363	1.50468	1.5426	0.0942507	-0.205176
YHR162W	1.21761	1.76893	0.694029	0.824037	0.728888	0.991626	-0.241212	-0.255639
YHR164C	-1.31102	-1.69599	-0.955796	-1.1948	-1.06926	-1.234	0.856548	0.314268
YHR165C	-0.62632	-0.766366	-1.06532	-1.48918	-0.874088	-1.22263	0.608125	0.228435
YHR169W	-0.953301	-0.401483	0.479298	0.164909	0.823462	0.0261077	2.02925	1.22242
YHR170W	-1.54379	-1.6445	-1.1521	-1.60665	-1.27988	-1.05759	2.19046	1.57241
YHR178W	0.143069	0.0215384	-0.73729	-0.979996	-0.741529	-1.05331	1.44464	0.944027
YHR180W	1.32577	1.04094	0.960425	0.760055	0.852378	0.827057	-0.202155	-0.878974
YHR183W	-2.08903	-2.33843	-1.42485	-1.64955	-1.2353	-1.4599	0.571282	0.18432
YHR186C	-0.850314	-1.33352	-0.479807	-1.20526	-0.680907	-0.92433	1.34751	0.664932
YHR187W	-2.30074	-1.80031	-2.37046	-2.22829	-2.58382	-2.65664	1.81306	0.918924
YHR190W	-0.243981	-0.359727	-0.627176	-1.00577	-0.807322	-0.9299	0.615858	0.292786
YHR192W	-2.03957	-2.51067	-1.91878	-2.32661	-2.15112	-2.40509	0.795576	-0.0210748
YHR199C	1.52376	1.69539	1.36334	1.43366	1.30931	1.29797	0.403836	0.187619
YHR203C	-0.922652	-1.28412	-0.709565	-0.819807	-0.904766	-0.895947	0.976204	0.851104
YHR206W	2.45496	2.37989	2.26603	1.94103	2.25237	2.22944	1.06024	0.863711
YHR208W	-2.50445	-2.7851	-3.13989	-3.3193	-3.27426	-3.64316	0.585833	-0.128279
YHR216W	-1.73192	-2.1472	-0.530073	-0.76976	-0.898729	-0.962339	0.340118	-0.331899
YIL002W-A	1.0171	1.37652	0.728348	0.571414	0.465788	0.494066	0.323407	0.412432
YIL004C	1.34951	1.23484	0.710216	0.863439	0.900959	0.829172	0.145295	-0.44764
YIL014C-A	0.253612	0.266664	0.673199	0.59655	0.735331	0.719847	-0.396459	-0.729792
YIL019W	-0.800737	-0.548741	-0.289857	-0.201487	0.0246048	-0.219258	1.80813	1.09316
YIL021C-A	-0.958878	-0.973448	0.0982463	-0.274705	-0.173697	-0.529239	1.21489	0.87264
YIL021W	-0.727008	-1.26026	-0.0549308	-0.343299	-0.223194	-0.270865	1.40451	1.34941
YIL023C	1.01716	1.1066	0.497308	0.410224	0.383963	0.477158	-0.0578674	-0.513875
YIL024C	2.52884	2.31973	0.627705	0.495953	0.789651	0.5009	1.19946	0.952511
YIL027C	-0.744305	-1.22897	-1.36977	-2.07014	-1.51268	-1.46546	0.628365	0.232576
YIL030C	0.192358	-0.559328	-0.807885	-1.14147	-0.530943	-0.817268	1.9809	1.69199
YIL030W-A,YIL031W	3.02683	2.40384	1.82305	1.15798	1.94017	2.2809	0.739465	0.381228
YIL033C	0.981279	1.16674	0.55678	0.569654	0.479373	0.493702	0.086785	-0.172158
YIL035C	-0.142954	-0.29643	-0.17075	-0.407821	-0.0337854	-0.396724	1.00092	0.718705
YIL045W	2.86696	3.42754	2.66965	2.51963	2.24885	2.29625	-0.855298	-1.595
YIL046W	3.95334	4.36359	2.73015	2.84729	2.63609	2.8427	0.187867	0.0252811
YIL047C,YIL047C-A	2.76532	2.8505	1.73494	2.04365	1.94264	1.89959	1.06254	1.06853
YIL050W	1.33613	1.11011	0.643596	0.238938	0.558886	0.312514	0.161152	-0.288083
YIL052C	0.411606	0.455107	-0.346545	-0.400235	-0.190582	-0.510223	0.136949	-0.0227644
YIL053W	0.0312379	-0.295089	-0.78679	-1.08708	-0.701243	-1.00537	0.571964	0.695538
YIL055C	3.42917	3.50661	2.46074	2.51174	2.18975	2.50545	0.86495	0.755926
YIL056W	2.17386	2.18392	2.44713	2.14288	2.25268	2.44406	1.0039	0.504013
YIL057C	2.82548	3.39205	1.48318	1.39422	1.12454	1.29684	0.328435	0.743459
YIL059C	1.01746	0.937603	0.460418	0.584524	0.429588	0.144883	-0.730348	-1.20997
YIL065C	1.26457	1.2888	1.16639	0.942568	0.959707	1.01812	0.168256	-0.491343
YIL066W-A	-0.430406	-0.243825	-0.745673	-0.335594	-0.0737162	-1.69348	0.618172	0.361671
YIL068C	-2.04738	-1.59622	-2.31615	-2.70282	-2.17106	-2.10447	1.27708	0.524148
YIL069C	-0.950882	-1.32441	-1.12111	-1.30439	-1.04153	-1.55867	1.34201	1.26902
YIL075C	0.38427	0.354127	-0.562123	-0.690795	-0.532364	-0.706808	1.05411	0.883497
YIL077C	2.29492	2.51444	2.01663	1.8532	1.74677	1.95937	0.280343	0.156268
YIL078W	-2.16805	-2.40003	-2.50422	-2.77645	-2.6755	-2.98023	0.813179	0.277571
YIL079C	-0.711686	-1.03029	-0.732083	-0.15245	-0.29151	-0.0290742	2.05011	1.16076
YIL086C	2.29035	3.39629	1.44076	1.08106	1.02347	0.727975	-0.102686	-0.68579
YIL087C	0.811096	0.723937	0.425215	0.295753	0.244706	-0.0546695	-0.711471	-1.40874
YIL090W	-0.93903	-1.40672	-0.63345	-1.11187	-0.61548	-0.895319	1.12894	0.873445
YIL091C	-0.84635	-0.79938	-1.89845	-2.45615	-1.50172	-1.4396	1.7665	1.16052
YIL093C	-1.48029	-1.87015	-1.72806	-1.61539	-1.52932	-1.60327	0.878493	0.0452769
YIL094C	-0.528324	-0.662294	-1.04949	-1.50926	-1.50638	-1.68271	1.13161	0.617443
YIL096C	-1.36047	-1.46183	-1.05575	-2.41009	-1.07494	-0.945626	1.08854	0.620705
YIL099W	3.67992	3.72275	2.47327	2.50799	2.3175	2.56744	-0.788876	-1.3871
YIL101C	2.64115	2.9446	1.84244	1.69989	1.4749	1.61293	0.416519	0.227829
YIL104C	-0.13794	-0.0884793	-0.478424	-0.298012	0.121607	0.17165	0.625256	0.402001
YIL105C	2.6069	2.79327	2.01052	1.88367	1.59833	1.70861	0.0329905	-0.346978
YIL106W	1.35903	1.35241	0.816848	0.856862	0.823066	0.697603	0.12678	-0.235668
YIL111W	1.77199	2.23344	1.29612	1.4235	1.30474	1.62064	-0.78749	-1.24183
YIL113W	1.14499	1.01515	0.805577	0.595438	0.273275	0.630108	-0.170091	-0.756219
YIL115C	-0.845913	-1.12591	-1.87677	-1.81181	-1.77737	-1.77758	1.09905	0.489981
YIL117C	-0.287508	-0.621697	-0.868183	-1.24819	-1.0362	-1.15238	1.28594	0.873913
YIL118W	2.38672	2.56554	1.75903	1.61275	1.98374	1.94609	0.729143	0.495923
YIL119C	1.18846	1.08091	0.366272	-0.155976	0.0672536	0.241131	-0.0495746	-0.355909
YIL122W	1.77367	1.71795	1.63195	1.32197	1.57018	1.55612	0.128004	-0.219633
YIL123W	-1.49952	-1.99431	-0.656233	-1.06003	-1.08217	-1.07472	0.337013	-0.252733
YIL125W	1.11565	1.15126	0.337262	0.100284	0.166318	0.13808	0.0355856	-0.380185
YIL126W	0.368569	0.0773192	0.87093	0.831647	0.926399	0.839594	1.96413	1.64541
YIL128W	-1.19672	-0.984129	-2.18074	-2.73275	-2.60641	-2.3545	1.11048	0.656245
YIL133C	-1.32094	-1.83816	-0.692186	-0.934689	-0.514995	-0.598977	0.665357	0.167665
YIL135C	1.80797	1.8598	1.30444	1.1353	1.09462	1.26244	0.124724	-0.325641
YIL136W	1.39339	1.78515	0.757895	0.8313	0.606007	0.727374	-0.385305	-0.784695
YIL138C	-1.24035	-1.83184	-1.5708	-1.70285	-1.50542	-1.71517	0.366825	0.186179
YIL142W	-0.117057	-0.54796	-0.405409	-0.468714	-0.357664	-0.494097	1.85169	1.1816
YIL143C	2.33365	2.62824	1.61163	1.39879	1.41901	1.46064	0.870932	0.389444
YIL144W	1.33997	1.2145	0.883192	0.67967	0.92218	0.982537	0.425392	-0.0226423
YIL150C	-0.77327	-1.21028	-0.538537	-1.02516	-0.383852	-0.820039	1.50565	0.880553
YIL152W	1.78833	1.86452	2.03791	1.87821	1.91022	2.15996	-0.056313	-0.784898
YIL153W	2.06516	1.93064	1.6581	1.76821	1.63032	1.69385	-0.271107	-0.805827
YIL155C	1.54118	1.51554	0.293261	0.188488	0.123214	0.162941	0.550206	0.379605
YIL160C	3.65555	3.89877	2.07703	2.01725	1.98555	2.37571	-0.00851946	-0.205766
YIL162W	1.97332	2.26786	1.164	1.18104	0.89333	1.12922	-0.890233	-1.39786
YIL164C	1.02034	0.918393	0.254572	-0.143235	0.327962	0.311424	0.0454965	-0.255364
YIL169C	-1.03824	-1.25179	-1.99249	-2.06271	-2.06374	-2.20609	1.21902	0.757885
YIR008C	-1.0984	-0.743819	-1.1087	-1.28959	-1.44173	-2.20312	1.00639	0.633582
YIR012W	0.158367	-0.0437531	-0.389972	-0.733148	-0.26795	-0.123832	1.30377	1.05011
YIR016W	2.38157	2.97858	1.85617	1.91696	1.69806	1.94916	-0.0265508	-0.0263876
YIR017W-A	3.52568	4.16231	3.32001	3.33247	3.34835	3.19089	-0.666783	-1.01055
YIR018W	3.79795	3.90423	3.37897	3.09372	2.7959	3.03299	-0.328702	-0.708504
YIR022W	-1.10766	-1.79184	-1.16617	-1.12623	-1.51621	-1.74228	0.648836	0.536235
YIR024C	0.245818	0.26838	-0.592951	-1.08255	-0.668994	-0.454518	1.13474	0.808289
YIR026C	-1.42235	-2.10726	-1.36867	-2.29414	-1.72701	-2.29169	1.36419	1.11906
YIR037W	0.0024743	-0.115663	-0.473892	-0.636857	-0.577373	-0.708558	0.511711	0.523189
YIR039C	0.78083	0.774912	-0.211882	-0.49743	-0.32172	-0.606011	-1.01979	-1.75405
YJL001W	-0.525888	-0.67997	-0.75592	-0.974831	-0.7741	-0.87331	0.577802	0.319542
YJL004C	0.801359	0.61857	0.460259	0.259953	0.253187	0.247103	0.144311	-0.104804
YJL010C	-1.7304	-1.26432	-1.47127	-2.05556	-1.4792	-2.02517	1.17442	0.461318
YJL013C	-0.378727	-0.437765	-0.254655	-0.492911	-0.269157	-0.582156	1.18459	1.06612
YJL014W	0.321442	0.208634	0.226698	0.182804	0.521063	0.223338	1.49752	1.10497
YJL019W	2.41014	2.39941	2.4098	2.16646	2.4829	2.1575	0.681692	0.123791
YJL020C	1.27174	1.19749	0.814608	0.547709	0.541192	0.604794	-0.0132896	-0.639412
YJL033W	-1.14628	-1.17183	0.0926723	-0.0372659	0.316966	0.0363812	1.15148	0.597568
YJL034W	1.67613	2.22712	1.27182	1.38758	1.25737	1.54158	0.1122	0.28084
YJL035C	3.08279	2.69648	2.15698	1.65415	1.7052	2.01258	0.475723	-0.492541
YJL036W	1.72487	1.76349	0.974594	1.09457	0.837422	0.822731	0.91379	0.437153
YJL037W	1.66912	1.73073	0.745878	0.304855	0.376605	-0.210779	-0.645771	-1.05052
YJL038C	0.121107	-0.112806	-0.391399	-0.821365	-0.532332	-0.700429	-0.861056	-1.16631
YJL039C	-1.46748	-1.73648	-1.63664	-1.65416	-1.48856	-1.41409	0.702292	0.23436
YJL041W	0.135138	-0.0960289	-0.201845	-0.664906	-0.197841	-0.341562	2.18666	1.963
YJL042W	2.23338	2.24915	2.09866	1.9934	1.77649	1.88089	0.702432	0.409492
YJL050W	-0.100518	-0.980218	-0.257973	-0.617432	0.496259	0.0859351	1.63694	1.41778
YJL052W	0.262781	0.360504	0.264409	0.324759	0.167078	0.273404	-0.837613	-1.31354
YJL055W	1.22872	1.37901	0.829812	0.764153	0.728128	0.848438	-0.678266	-1.31676
YJL056C	3.99563	3.64257	1.63198	1.55632	1.39389	0.733031	-0.213947	-0.902018
YJL060W	0.100252	-0.186793	-0.724065	-1.03761	-1.06468	-1.3718	-1.25519	-1.83205
YJL062W-A	1.06221	1.10225	0.487212	0.192328	0.321877	0.183462	0.0801332	-0.384517
YJL066C	1.16325	1.55227	0.91897	0.800557	0.698774	0.867543	0.0684411	-0.355609
YJL068C	0.0411498	-0.192274	0.234583	-0.0351102	0.063504	-0.0649215	0.798492	0.556808
YJL069C	-0.668065	-0.77492	-1.36021	-0.849683	-0.289796	-0.243905	1.53673	1.02376
YJL074C	-1.43206	-1.03816	0.0971954	-0.168177	0.486113	0.0876401	1.10517	0.655932
YJL077C	1.5115	1.50932	1.26136	0.899412	0.841447	0.937619	0.556038	0.095022
YJL080C	-2.45483	-2.5335	-2.61825	-3.07601	-2.62955	-2.92166	0.826606	0.0741496
YJL081C	-0.784995	-1.06158	-0.180324	-0.818172	-0.240902	-0.342649	1.47424	0.780968
YJL085W	-2.12226	-3.07233	-2.1444	-2.42339	-2.27517	-2.55403	0.617043	0.840818
YJL089W	1.05083	0.769229	1.62406	1.18817	1.56414	1.55926	2.38724	2.07977
YJL095W	-0.814015	-1.14042	-0.584626	-0.859514	-0.707499	-0.787448	1.49376	0.863918
YJL098W	-0.197949	-0.15834	-1.12475	-1.0151	-0.450547	-0.548502	1.13766	0.849366
YJL100W	1.73192	1.7244	0.623846	0.544713	0.476675	0.508133	0.644398	0.0651777
YJL102W	3.47778	3.21099	2.708	2.143	2.47948	2.40422	1.67489	1.24816
YJL103C	2.96107	2.94981	2.7835	2.49371	2.64984	2.74125	1.45124	0.984902
YJL106W	1.94668	1.62186	0.371655	0.0944457	0.403583	0.120706	0.201939	-0.359705
YJL107C,YJL108C	2.2661	2.66144	1.63113	1.44495	1.51276	1.50987	-0.676528	-1.30829
YJL115W	1.29046	1.6283	-0.247791	-0.558437	-0.454312	-0.746853	0.375414	0.0995539
YJL116C	1.59697	1.34658	1.44689	1.28659	1.43872	1.44195	0.0731324	-0.535579
YJL122W	-0.740745	-0.0627009	-0.758415	-1.31042	0.348357	-0.482296	1.21617	1.25109
YJL123C	-1.23225	-1.67922	-2.04919	-2.30492	-2.10208	-2.17103	1.12783	0.566988
YJL125C	-0.285221	-0.495639	-0.51773	-1.26682	-0.885524	-0.840761	0.884578	1.02685
YJL129C	-0.729562	-0.695147	-0.440544	-0.952604	-0.712996	-0.822129	1.13499	0.550457
YJL133C-A	1.78196	2.56514	1.17328	1.27567	1.13135	1.47206	-0.13252	0.00112242
YJL134W,YJL135W	1.70465	1.90659	1.60468	1.48842	1.48064	1.58286	0.00447446	-0.379952
YJL137C	1.77086	1.64504	0.752403	0.297987	0.268645	0.273867	-0.0188516	-0.756289
YJL138C	0.817501	0.830291	0.484018	0.507393	0.58053	0.451557	0.179146	0.166091
YJL141C,YJL142C	2.09877	2.26571	1.15156	1.1324	0.908045	0.963567	0.0400269	-0.399923
YJL144W	1.65276	2.3943	1.24172	1.48164	1.14776	1.48293	0.1145	0.321422
YJL148W	-0.981615	-1.48225	-0.489564	-1.524	-0.614022	-0.480971	1.84491	1.29219
YJL151C	0.862577	1.19154	0.340689	0.380555	0.318124	0.346209	0.159487	0.19402
YJL155C	1.42889	1.53683	1.05536	1.07839	0.993801	1.12135	0.260586	-0.108676
YJL159W	-0.249979	-0.409139	-0.504807	-0.538777	-0.59381	-0.647823	0.270249	0.438745
YJL163C	1.78825	1.58429	1.64119	1.48816	1.43413	1.32979	-0.0677294	-0.812609
YJL164C	1.66505	1.64119	1.11581	1.02137	1.03492	1.0913	-0.69966	-1.3497
YJL166W	1.59165	2.34363	0.900667	1.28361	0.953991	1.33364	-0.149717	0.00831583
YJL167W	-0.930851	-1.16577	-1.51883	-1.82598	-1.4839	-1.73131	0.550208	0.192307
YJL170C	1.65863	1.56829	1.2757	1.32876	1.42155	1.17117	0.988022	0.881089
YJL172W	0.960215	0.645504	0.938654	0.662189	0.599753	0.60072	1.97064	1.9516
YJL177W	-0.583789	-1.01129	-1.26043	-1.60884	-1.63588	-1.66242	0.963832	0.551387
YJL180C	-1.30684	-1.00021	-2.07966	-2.96412	-2.14237	-2.6534	0.242303	0.0172897
YJL190C	-0.699544	-1.18032	-1.3175	-1.34226	-1.36938	-1.58084	1.09954	0.679942
YJL191W	0.224575	-0.10319	0.47522	0.470968	0.579202	0.380326	1.35857	1.00716
YJL196C	1.50407	1.62034	0.606654	0.518052	0.892299	0.833163	-0.364712	-0.958479
YJL199C	1.72307	1.99781	1.65413	1.57886	1.09147	1.65217	0.164272	-0.686683
YJL200C	-1.62236	-1.83703	-2.92874	-3.52673	-3.52608	-3.5286	0.968862	0.410202
YJL202C	-0.804307	-0.468233	-0.344836	-0.770263	-0.108393	-0.173824	1.30096	0.712786
YJL203W	-0.282677	-0.268252	-0.568485	-0.511161	-0.357	-0.196536	1.32758	1.2121
YJL205C	1.89049	1.85838	1.17833	1.06315	1.11375	1.29341	0.398871	0.17605
YJL207C	-1.11718	-1.03436	-1.37445	-1.3885	-1.23657	-0.970074	0.857343	0.28439
YJL210W	1.89203	1.85428	1.65286	1.52395	1.29324	1.42388	-0.107788	-0.658395
YJL212C	1.48728	1.39555	1.44733	1.27183	1.24964	1.24634	-1.13144	-1.64149
YJL218W	-0.516209	-0.668736	-1.28538	-2.09516	-1.54595	-1.49877	1.01809	1.83977
YJR008W	1.90803	2.33938	1.31583	1.33637	1.13006	1.33246	0.100176	-0.0498959
YJR010W	0.262752	-0.183821	-0.814093	-0.981178	-0.68989	-0.769753	-1.77248	-2.00046
YJR014W	-0.418912	-0.630868	-0.839806	-1.1302	-0.653831	-1.08655	0.784238	0.356321
YJR016C	-1.34789	-2.12154	-1.50036	-2.09832	-1.4604	-1.75213	1.46271	0.85036
YJR027W	1.3116	1.36672	0.392292	0.557655	0.398178	0.674115	-0.276612	-0.389138
YJR029W	0.919148	1.33465	-0.17605	1.2295	0.298995	1.41518	-0.19876	0.131132
YJR032W	-0.640007	-0.899924	-1.38897	-1.1497	-0.987235	-0.783467	0.733942	0.248785
YJR038C	0.480281	0.49398	0.630621	0.0584528	0.0531535	0.0105821	-1.18913	-1.78138
YJR039W	0.396285	0.531819	0.438334	-0.502604	-0.0515884	0.0642301	-0.099331	-0.143386
YJR040W	-1.01181	-1.28908	-0.812026	-0.746262	-0.720262	-0.881008	0.780132	0.480701
YJR042W	-2.04495	-2.38693	-3.43089	-3.91872	-3.17877	-3.9606	1.28473	0.707844
YJR045C	1.23891	1.4994	0.749338	0.822727	0.749749	0.889978	0.334163	0.360601
YJR046W	3.45334	3.67104	2.50308	2.3834	2.53427	2.69659	0.617455	0.570155
YJR052W	1.54859	1.35217	0.78527	0.644195	0.768766	0.85969	0.58192	0.303577
YJR053W	-0.539313	-1.63359	-0.856648	-0.588452	-0.258558	0.0806486	1.29907	1.27203
YJR056C	0.548015	0.56906	-0.167362	0.0685189	0.0850228	-0.556384	0.0740299	-0.174483
YJR058C	1.30609	1.1818	0.526452	0.395296	0.588969	0.311799	-0.266686	-0.907795
YJR059W	1.53834	1.42987	0.87171	0.762954	0.648571	0.741787	-0.319705	-1.03336
YJR060W	1.7364	1.75866	1.44341	1.23383	1.12429	1.04707	0.0310174	-0.636258
YJR061W	0.630094	0.531329	-0.301565	-0.809634	-0.383301	-0.604357	1.40503	1.17355
YJR067C	0.166901	0.377565	-0.0442245	-0.769677	0.154414	0.355591	1.5432	1.12642
YJR069C	-1.65125	-2.45064	-2.04126	-3.18897	-1.95677	-1.94359	0.293395	0.343862
YJR070C	-1.97153	-1.86571	-2.00878	-2.49497	-1.67296	-2.82756	1.2596	0.384846
YJR072C	-0.148268	-0.56524	-0.367085	-0.491437	-0.397273	-0.497068	1.25615	1.05116
YJR073C	1.21101	1.58229	1.0568	1.05979	0.911266	1.19681	0.124434	-0.06223
YJR074W	1.5083	1.29811	1.32779	1.17982	1.39067	1.22438	0.464068	0.113191
YJR077C	2.26378	2.80604	1.81131	1.75232	1.65984	1.96609	0.00379903	-0.29932
YJR078W,YJR079W	2.17918	2.42933	2.70671	2.23965	2.76828	2.48067	0.771406	0.279444
YJR082C	1.02973	1.17778	0.523847	0.668704	0.930958	0.672298	-0.29005	-0.142683
YJR084W	-0.884114	-1.11075	-1.24743	-1.97599	-1.52966	-1.40219	0.42934	-0.0168015
YJR085C	1.22875	1.73811	0.6143	0.562237	0.595791	0.714652	-0.0130794	-0.0996189
YJR086W,YJR087W	0.808164	0.855116	0.160519	0.142615	0.233725	0.502141	0.223836	-0.0636067
YJR091C	1.98107	1.973	1.42036	1.22313	1.172	1.29083	0.443301	0.0388206
YJR096W	1.82333	2.36693	1.11687	1.1213	0.904254	1.09184	-0.587691	-1.07201
YJR097W	2.5889	3.56326	0.952531	0.761326	2.14375	2.43062	0.684607	-0.143673
YJR099W	-0.820795	-1.0811	-0.744584	-1.1124	-0.731038	-0.782698	0.205722	-0.00706712
YJR100C	0.504939	0.758604	0.1705	-0.226471	0.0806972	0.0567687	-0.0548993	-0.343334
YJR104C	1.01284	1.44015	0.707952	0.820763	0.654644	0.896807	-0.157631	-0.0469073
YJR105W	0.924484	0.903967	0.540357	0.463645	0.487583	0.474225	0.219699	-0.130053
YJR110W	2.05365	1.9609	1.63865	1.60897	1.70032	1.71261	0.373981	-0.0518164
YJR111C	-1.60165	-1.84609	-0.898475	-0.651184	-0.762474	-1.14414	0.600482	0.233347
YJR113C	1.37447	1.49697	0.998699	0.937324	0.92741	0.940886	0.0403109	-0.344786
YJR114W	1.42562	1.16931	1.30785	0.923912	0.982118	0.914675	-0.141865	-0.367838
YJR115W	2.37776	2.68101	1.68113	1.75195	1.37687	1.8764	-0.337064	-0.60435
YJR116W	0.946434	1.18085	0.399328	-0.242367	0.152853	-0.100171	-0.49215	-1.33183
YJR118C	-3.25615	-2.73611	-2.96669	-4.59074	-4.03288	-2.62525	0.82101	0.482095
YJR119C	0.449163	0.659989	-0.39725	-1.04515	-0.305257	-0.482041	-0.963502	-1.70628
YJR121W	1.41493	1.79312	0.953709	1.05119	0.880553	1.09084	-0.284213	-0.607103
YJR123W	-0.163874	-0.525509	-0.358256	-0.524262	-0.456273	-0.675022	0.623287	0.490053
YJR127C	1.24963	1.09344	0.345423	0.0332989	0.240497	0.242949	-0.351215	-1.04198
YJR134C	-1.0736	-1.22074	-1.5983	-1.70857	-1.32956	-1.86663	1.10048	0.875747
YJR140C	-1.33901	-2.21746	-1.17164	-1.8752	-1.78353	-2.15293	0.619086	0.323904
YJR143C	-2.90362	-2.96116	-3.39165	-3.70286	-3.36477	-2.97696	0.904246	-0.359526
YJR145C	-0.720771	-1.06108	-0.759492	-0.875762	-0.876542	-1.07512	0.879152	0.5031
YJR146W,YJR147W	2.67018	2.5791	0.880862	0.49619	0.648827	0.569059	1.63937	1.46201
YJR152W	0.800806	1.06024	0.548911	0.536518	0.58189	0.624167	2.64908	2.11016
YJR155W	1.6115	1.59862	0.989594	0.932228	1.07226	1.07458	-0.21949	-0.590659
YKL002W	1.76063	1.91536	1.19749	1.1394	1.09322	1.12601	0.284538	0.120229
YKL003C	1.55638	1.45062	1.0868	1.10241	1.18501	1.42669	0.39876	0.0591313
YKL004W	2.88959	3.24564	1.87352	1.63403	1.65891	1.9192	0.857624	0.367618
YKL005C	2.23309	2.58325	1.87624	1.53934	1.73223	1.66239	0.846445	0.314841
YKL006W	-0.850838	-1.03284	-1.03599	-1.09612	-0.89276	-0.983864	0.673416	0.599455
YKL009W	1.2434	1.05064	0.525728	0.303036	0.808844	0.611283	1.93325	1.97088
YKL014C	-1.51939	-2.75225	-1.92123	-2.49769	-2.14027	-3.16447	1.33473	0.683142
YKL015W	2.32237	2.50679	2.17345	1.88987	2.3442	2.29198	1.53924	1.16148
YKL016C	0.632695	0.759626	-0.287503	-0.52335	-0.336121	-0.461309	-0.346052	-0.706609
YKL021C	-0.744809	-0.995291	0.07358	-0.240899	0.188369	0.241045	0.533735	0.122738
YKL023W	2.13676	2.52417	1.91017	1.58806	1.70242	2.13825	-0.118234	-0.54561
YKL026C	1.89294	2.20812	1.27389	1.18135	1.03748	1.42868	-0.279517	-0.665264
YKL029C	0.224112	-0.11061	0.163136	-0.056546	0.447052	0.382319	1.20152	1.00169
YKL032C	2.34398	2.31738	1.91955	1.96672	1.87429	1.64807	0.808004	0.688474
YKL034W	1.45182	1.11584	1.71631	1.64378	1.72196	1.70193	-0.44129	-0.906791
YKL035W	1.14412	1.38901	0.982122	1.12176	0.856325	1.12399	-0.440322	-0.695965
YKL036C	2.21899	3.18859	1.69625	1.55968	1.64576	1.3353	0.287899	0.0224286
YKL038W	1.51393	1.50569	1.16522	0.91585	1.09044	1.00876	0.302961	-0.418014
YKL043W	2.36421	2.31909	1.20619	0.848959	0.933995	0.987431	1.04063	0.650278
YKL044W	2.41909	1.97295	1.18659	0.914184	0.953406	0.782673	0.466696	0.578777
YKL048C	-0.341798	-0.506816	-0.316716	-0.0682224	-0.10877	-0.316693	0.488147	0.254331
YKL049C	-0.126781	-0.299654	-0.207463	-0.0833043	-0.11498	-0.196209	0.769766	0.533371
YKL052C	2.77594	3.06313	1.99064	2.16187	1.85828	1.99629	0.435966	0.35493
YKL053C-A	1.70749	1.8716	1.18153	0.944027	1.05916	1.06092	0.420964	0.514768
YKL053W	3.25598	2.82598	2.80706	2.50055	2.87034	2.1326	0.209135	-0.0709392
YKL054C	-0.708334	-1.11906	-1.30124	-1.69477	-1.31733	-1.57915	1.15891	0.741648
YKL055C	0.379554	-0.0128446	1.57455	-0.352988	0.67802	0.302276	1.66964	1.37552
YKL056C	0.128001	0.171541	-0.37487	-0.482431	-0.323153	-0.534096	-0.0218808	-0.0706887
YKL057C	-1.67928	-2.10574	-1.605	-2.17248	-1.34891	-1.75993	1.22864	0.64301
YKL058W	1.66366	1.7524	1.44029	1.2844	1.25025	1.35242	0.469704	-0.0602442
YKL059C	2.34039	2.74291	1.89828	1.77039	1.90437	1.71772	1.08691	0.751609
YKL060C	0.48546	0.608166	-0.13552	-0.123247	-0.20708	-0.204666	-0.456992	-0.647714
YKL061W	2.19951	2.578	2.38061	2.20303	2.40207	2.51379	1.2779	1.00789
YKL065C	1.00946	1.3161	0.410691	0.481559	0.347055	0.487873	-0.00391846	5.77039e-05
YKL065W-A	2.22215	1.93375	2.07494	1.71263	1.38772	2.48537	0.0197255	0.043271
YKL066W	1.20379	1.26818	1.02383	0.790679	0.930802	0.765457	-0.84434	-1.01053
YKL067W	1.13355	1.45072	0.609104	0.732196	0.498074	0.638123	-0.431229	-0.71437
YKL068W	2.56583	2.70259	1.53969	1.52678	1.531	1.68671	0.764166	0.108165
YKL068W-A	2.998	4.21069	2.77378	2.99525	2.64418	2.9169	-0.797643	-1.27586
YKL069W	-0.0914342	-0.252212	0.216685	0.0419134	-0.274143	0.0103384	0.745689	0.657401
YKL070W	1.89703	1.82363	1.55644	1.50423	1.46148	1.46586	-0.157768	-0.513646
YKL074C	-0.554311	-0.470485	-0.554703	-0.630595	-0.325793	-0.566794	0.997168	0.435997
YKL078W	-0.220315	-0.779466	-1.81281	-1.91654	-2.51512	-1.96512	1.35808	2.17572
YKL080W	-1.82497	-1.90854	-2.50572	-2.96537	-2.40573	-2.65172	0.376982	-0.442108
YKL082C	1.64751	1.78035	0.094395	-0.0767226	0.424018	0.483084	0.420171	0.0232615
YKL084W	-0.915945	-1.27149	-0.366886	-1.36958	-1.12224	-0.817071	1.19542	0.587608
YKL085W	1.02108	1.21709	0.38828	0.396699	0.345509	0.332647	-0.0530305	-0.457631
YKL087C	1.35367	1.65832	0.936003	0.717974	0.813647	0.522058	0.553138	0.288304
YKL090W	0.988305	1.38519	0.533934	0.229037	0.51638	0.357933	-1.34317	-2.08675
YKL091C	1.3894	1.59177	0.352526	0.273144	0.285037	0.238091	-1.60516	-2.56616
YKL093W	2.18544	2.18302	1.91155	1.42505	1.49812	1.7331	-0.14114	-0.551209
YKL094W	1.68892	1.84066	1.5823	1.58283	1.49223	1.54497	-0.121747	-0.333551
YKL095W	1.96298	2.06497	2.1369	2.10355	2.07331	2.1632	0.0939345	-0.242756
YKL096W	0.794369	0.84761	0.279652	0.299247	0.169675	0.316409	-0.366525	-0.596436
YKL096W-A	0.138922	0.0923226	0.0109558	0.00714978	-0.157657	-0.188479	-0.213814	-0.342139
YKL102C	2.65705	2.0832	-0.941768	-0.47667	-1.28522	-1.95277	-0.0324555	-0.886782
YKL109W	0.585516	0.526612	0.0599193	-0.0991208	-0.0283118	-0.212988	-1.53828	-2.37023
YKL112W	1.24629	1.42191	1.10166	0.906443	1.3011	1.29666	0.153894	-0.133442
YKL113C	-0.885404	-0.455131	-0.359254	-0.85139	-0.509044	-0.800686	1.37913	1.02018
YKL114C	-0.792363	-1.14938	-0.310709	-0.51858	-0.302332	-0.862126	0.585672	0.265806
YKL117W	0.950618	1.03392	0.118135	-0.0231087	0.057423	0.108223	0.615138	0.600019
YKL122C	-1.20494	-1.39638	-1.71349	-2.04696	-1.62412	-2.333	0.289121	0.294697
YKL125W	1.03833	1.22443	0.0170138	-0.372058	0.0995473	0.197511	0.622454	0.526568
YKL135C	-0.532717	-0.760349	-0.520236	-1.03405	-0.57375	-0.783182	1.26463	0.791113
YKL141W	1.06221	1.38568	0.313713	0.155011	0.225265	0.126712	-0.068819	-0.16405
YKL142W	0.745117	0.818196	0.182939	0.124933	0.123141	0.126469	0.036897	-0.0680116
YKL143W	-0.288262	-0.575548	-0.695477	-0.874019	-0.667222	-1.20886	1.64771	1.19912
YKL145W	0.574305	0.548283	0.201185	0.129841	0.296914	0.169812	1.17186	1.04576
YKL146W	2.07691	2.16771	1.29185	1.09316	1.06406	1.00504	0.350497	-0.0543385
YKL147C	3.17506	2.75245	1.96232	1.49509	1.55078	1.01211	0.713592	-0.39984
YKL148C	1.56361	1.66799	0.920255	0.766909	0.726617	0.699614	-0.149559	-0.4692
YKL150W	0.64256	0.432545	-0.968813	-1.19457	-0.96338	-1.27484	-0.841246	-1.43807
YKL151C	1.11555	1.41442	0.371503	0.283548	0.303343	0.223251	-0.900689	-1.38255
YKL152C	0.553076	0.662422	0.0765027	0.120723	0.0409089	0.114944	-0.679933	-1.08656
YKL153W	0.0657751	0.175733	-0.528486	-0.183204	-0.278557	-0.481927	-0.751969	-1.13517
YKL155C	-0.337919	-1.00431	-0.180478	-0.175451	0.00997048	-0.109433	1.70786	1.24158
YKL156C-A	1.76153	1.8632	1.08913	1.02737	1.08993	1.00242	0.424639	0.550261
YKL159C	-1.45901	-1.18354	-0.2795	-0.885803	-0.294869	-0.462006	1.00345	0.660678
YKL164C	0.0217165	-0.163825	-1.14727	-1.40504	-1.23572	-1.3792	0.523737	0.586846
YKL171W	2.42385	2.68042	2.27778	2.30715	2.11769	2.25649	0.930241	0.56408
YKL172W	-0.651947	-0.972789	-0.511741	-0.856709	-0.464343	-0.486313	1.21883	0.879697
YKL173W	-0.606264	-0.674636	-0.607752	-0.781611	-0.588888	-0.330687	1.88204	1.26564
YKL175W	1.72144	1.78117	0.967028	0.822498	1.06652	1.02532	0.160543	-0.318313
YKL177W	-1.88071	-1.96127	-0.515586	-0.862627	-1.41967	-0.827167	-0.336389	-0.804513
YKL182W	-1.96627	-2.14969	-2.05332	-2.33534	-2.07918	-2.3021	0.775271	0.255445
YKL184W	-0.190646	-0.241659	-0.34121	-0.628756	-0.679969	-0.365183	0.560102	0.320419
YKL185W	-2.04402	-1.82615	-2.77416	-3.05607	-2.96649	-2.96651	0.818694	0.0671341
YKL186C	1.05084	1.02401	0.92277	0.859142	0.803157	0.90084	0.662715	0.640128
YKL187C	3.09725	3.04181	1.69017	1.5025	1.68985	1.94204	0.319312	-0.103904
YKL190W	1.07428	1.42955	0.84071	0.712951	0.703896	0.557299	0.191284	-0.0818314
YKL192C	0.568273	0.950703	0.548962	0.477047	0.446295	0.427212	-0.239298	-0.379472
YKL195W	1.63597	1.78888	0.877415	0.873563	0.686667	0.678919	0.568809	0.213536
YKL196C	1.32203	1.36137	0.602521	0.574981	0.682686	0.693968	0.913268	0.859157
YKL198C	2.70399	2.90935	2.05196	1.99295	2.08347	2.23328	0.213116	-0.213482
YKL201C	2.72931	3.05297	2.57821	2.37809	2.43813	2.64414	-0.535239	-1.11232
YKL202W	2.78349	2.58345	2.79462	2.02074	2.5267	2.68846	-0.361728	-0.607166
YKL203C	-0.319883	-0.434306	-0.442186	-0.755107	-0.318696	-0.493445	1.84232	1.27197
YKL210W	-0.683589	-1.341	-1.59659	-1.59704	-1.45871	-1.72699	1.12635	0.747831
YKL212W	-1.30088	-1.48303	-1.61629	-1.84528	-1.37137	-1.90075	0.669724	0.333775
YKL217W	2.15569	2.66166	2.15471	2.18971	1.76721	1.9534	0.260741	0.408874
YKL218C	0.224904	0.254861	0.793772	0.726575	0.642726	0.626462	-1.08785	-1.63629
YKL220C	1.33358	1.35361	-0.305859	-0.298412	-0.327222	-0.516835	0.188747	-0.3889
YKL221W	1.89837	2.12191	0.234704	-0.0750537	0.26427	0.0790763	-1.56486	-2.01132
YKR002W	1.58601	1.44797	1.18756	0.980948	1.23125	1.02807	0.439275	0.10687
YKR007W	2.09812	2.03372	1.62525	1.37129	1.46436	1.35148	0.86802	0.589514
YKR009C	3.45338	3.95628	2.77355	2.76718	2.56574	2.88861	0.174053	-0.15459
YKR010C	-0.572047	-0.71614	-1.76997	-1.30407	-1.16039	-1.25144	0.777748	0.551657
YKR014C	1.8654	2.52566	1.08719	1.12516	1.04174	1.19778	0.43068	0.270794
YKR016W	2.04036	1.94179	1.73887	1.55896	1.42576	1.51901	-0.753663	-1.38836
YKR019C	0.859822	0.649691	1.10634	0.758914	0.991239	0.934555	1.60081	1.42436
YKR023W	-2.10773	-1.866	-1.66053	-1.71742	-1.99083	-2.00534	0.817047	-0.0205237
YKR025W	0.391758	0.244799	0.0600261	-0.317032	0.29088	0.166884	1.61733	1.59108
YKR026C	-1.56059	-1.99725	-1.94603	-1.89088	-1.70006	-1.80048	0.598096	0.285505
YKR027W	-0.572568	-0.583372	-1.05365	-1.13474	-0.971199	-1.5842	-0.130608	-0.258478
YKR028W	-1.62755	-1.63746	-1.28988	-1.67003	-1.21979	-1.45355	1.22814	0.672571
YKR034W	2.53385	2.44916	2.505	2.38651	2.34252	2.03144	1.65874	1.25627
YKR038C	1.09287	1.1016	0.239951	0.084781	0.188493	0.0368053	-0.145401	-0.718281
YKR039W	2.16347	2.28012	0.143535	-0.292298	-0.144059	-0.250441	2.85169	2.78502
YKR041W	1.19997	1.38109	2.00237	1.10424	1.15793	1.69298	0.675497	0.404574
YKR042W	1.16971	1.60543	0.695985	0.745331	0.568922	0.800376	0.110713	0.168925
YKR046C	0.989205	0.932976	0.0324179	-0.0821592	0.00951623	-0.0718692	0.33465	0.0475051
YKR047W	1.27122	1.68439	1.1469	0.910923	0.878331	0.335497	0.408135	0.459613
YKR049C	1.63288	1.94635	0.817974	0.908765	0.806392	0.792219	0.0789657	-0.155568
YKR052C	1.4801	1.06399	1.78588	1.6227	1.44594	1.27452	-0.541753	-1.43747
YKR055W	0.281191	0.304751	0.211593	-0.26645	0.286947	-0.0188609	0.942765	0.857243
YKR058W	1.06667	1.02755	0.692602	0.526679	0.610905	0.571137	-0.692211	-1.71473
YKR059W	-1.69068	-2.67062	-2.51826	-3.04508	-2.73618	-2.58405	0.821165	0.124766
YKR060W	-1.48784	-1.58565	-2.47463	-2.61735	-1.80454	-1.73562	-0.388204	-0.525888
YKR061W	-0.0591776	-0.142864	-0.364429	-0.495196	-0.431507	-0.664696	-1.53446	-2.31591
YKR063C	-0.198039	-0.73475	-0.428449	-0.670642	-0.497344	-0.454554	1.51385	1.18814
YKR064W	-0.579547	-0.956245	-1.11426	-1.61505	-0.969089	-1.17078	1.2121	0.741981
YKR066C	2.42269	2.98322	1.44982	1.46165	1.33592	1.49801	-0.189442	-0.394339
YKR069W	0.871689	0.843411	0.330269	-0.0289599	0.262316	0.347369	-0.79727	-1.48338
YKR071C	1.84379	2.18869	1.737	1.64968	1.74634	1.87668	1.05694	0.736898
YKR072C	1.72994	1.78911	1.47828	1.23958	1.27836	1.4375	0.371642	0.0718409
YKR075C	0.771869	0.962888	-0.293131	-0.405416	-0.203875	-0.296591	0.173294	-0.164927
YKR075W-A	0.815341	0.967571	-0.424398	-0.480725	-0.390518	-0.487828	0.155464	-0.110794
YKR080W	-1.51657	-1.74719	-1.26093	-1.49718	-0.923534	-1.17073	0.847312	0.0622384
YKR082W	-1.36155	-1.16365	-2.31505	-2.55521	-2.44369	-2.34188	0.80049	0.420531
YKR085C	-0.55857	-0.743884	-0.624325	-0.788054	-0.190423	-0.462992	0.643481	0.348887
YKR086W	0.492969	0.62822	0.109537	-0.0403543	0.278438	0.179805	1.86728	1.46511
YKR089C	2.03088	2.27341	1.41238	1.30726	1.17536	1.31367	-0.207741	-0.723202
YKR091W	-0.900934	-1.51886	-1.77243	-2.02213	-2.08021	-2.1096	0.540533	0.202397
YKR094C	-0.458498	-0.803866	-0.158789	-0.0909626	-0.175055	-0.191738	0.803595	0.569867
YKR096W	2.04513	1.99513	1.31815	0.856922	1.06703	1.26091	1.07024	0.663039
YKR097W	0.897152	0.987576	1.60265	1.54306	1.6314	1.75829	0.531875	0.316346
YKR098C	0.784544	0.497425	0.453465	0.15023	0.462924	0.396093	-0.852353	-1.48746
YKR100C	0.993242	1.07694	0.149224	-0.38146	-0.134045	-0.290681	0.244983	-0.177389
YKR102W	1.86461	1.54801	1.22242	0.914159	0.988586	1.10435	0.25324	-0.156769
YLL004W	-0.181704	-0.447825	-0.905161	-0.993881	-0.807042	-1.0314	0.973435	1.26405
YLL005C	0.779581	0.749738	-0.359938	-0.483365	-0.318152	-0.579909	-0.072977	-0.251747
YLL008W	-0.772987	-1.01854	0.227878	-0.441485	0.247181	0.199177	0.812886	0.356072
YLL009C	1.06982	1.06228	0.767906	0.613822	0.684895	0.620825	-0.246479	-0.330439
YLL010C	2.25384	2.71227	2.02357	1.56207	1.79271	2.26736	0.86256	0.478836
YLL011W	-0.381557	0.0757405	0.166794	0.19852	0.641362	0.376102	2.36316	1.87755
YLL014W	0.730119	0.717981	0.434979	0.323748	0.461778	0.397553	0.182933	0.182548
YLL015W	0.0838076	-0.0744756	-0.05327	-0.206833	-0.0309434	0.0191853	1.55938	1.02261
YLL018C	-1.38893	-1.63181	-1.59928	-1.97043	-1.75202	-2.12971	0.662429	-0.0289233
YLL018C-A	2.36312	2.91945	2.65828	2.66735	2.78791	2.56778	0.0995995	-0.201259
YLL019C,YLL020C	3.35435	3.66178	2.97102	2.73713	2.46456	2.80389	0.504927	0.412779
YLL021W	-1.38938	-1.44202	-0.317074	-0.593722	-0.458242	-0.569466	1.67719	1.12988
YLL023C	0.843593	0.994803	0.639028	0.553196	0.539044	0.544655	-0.400215	-0.682881
YLL024C	0.893599	1.03823	0.621845	0.679233	0.688735	0.858082	0.189661	0.288314
YLL025W	0.975369	1.69224	-0.358208	-1.16034	0.161968	-0.756502	-0.717925	-0.264939
YLL026W	1.40309	1.91934	0.87917	1.00813	0.807273	1.06512	0.0459521	0.293583
YLL027W	1.75578	1.93893	1.0006	0.999861	1.06241	1.04984	0.461807	0.303948
YLL029W	1.81737	2.14968	1.35741	1.38535	1.2427	1.38511	0.352651	0.20106
YLL030C	2.78778	2.08231	-0.780228	1.9173	1.62781	3.59164	0.412694	0.129018
YLL034C	-2.00385	-1.31611	-2.85313	-3.16416	-2.08157	-2.54735	2.01004	1.866
YLL036C	-0.666059	-0.714056	0.208577	-0.237052	-0.0237461	-0.0190824	0.854377	0.445262
YLL039C	1.42456	2.07368	0.805623	0.975273	0.751138	1.1125	0.0607006	0.298848
YLL040C	1.3805	1.28166	-0.248424	-0.695462	-0.606526	-0.712503	0.0195082	-0.576817
YLL041C	1.75784	1.88126	1.22533	0.919494	0.956715	1.08123	0.0204408	-0.31705
YLL043W	1.56898	1.49948	1.29473	1.1827	1.2474	1.29339	0.839057	0.53555
YLL044W	-0.374872	-0.468102	-0.437257	-0.650014	-0.452552	-0.556382	0.685124	0.536837
YLL045C	-0.342283	-0.443458	-0.475723	-0.724858	-0.517194	-0.739724	0.536275	0.565192
YLL048C	-1.79661	-1.81194	-2.5192	-2.91437	-2.58287	-2.83772	0.422525	0.0324368
YLL049W	1.18341	1.38105	0.0762632	-0.111539	0.140152	0.0279228	-0.756122	-1.35978
YLL055W	2.0617	2.20096	2.32622	2.00532	2.00172	1.92746	0.0305862	-0.309788
YLL056C	2.03276	2.00042	1.93646	1.7038	1.37016	1.8867	0.292053	-0.0881862
YLL058W	0.0567534	-0.70264	0.37354	-0.262787	0.178473	-0.32118	1.60919	1.48301
YLR001C	2.02286	2.22354	1.68907	1.50683	1.56152	1.5478	0.201591	-0.0759012
YLR005W	1.39209	1.23307	0.865139	0.714395	0.821262	0.544	0.793632	0.570799
YLR007W	1.60944	1.62046	0.749574	0.299431	0.728583	0.720077	0.653921	0.169401
YLR011W	-1.99215	-2.0091	-1.77014	-2.28367	-1.64203	-2.67235	0.249839	-0.39018
YLR012C	2.06346	1.65007	0.635444	0.218143	-0.65087	0.351768	-0.140771	-0.865186
YLR019W	2.12241	2.08273	1.43589	1.58114	1.32963	1.41081	0.770263	0.286096
YLR023C	3.4771	4.09559	2.69203	2.65251	2.55022	2.78038	-0.208447	-0.755473
YLR025W	0.729915	0.841637	0.146555	-0.0998726	0.231464	0.246634	0.275797	0.227162
YLR029C	0.658677	0.823217	0.00834525	-0.0506208	-0.124249	-0.0599866	0.210993	0.248489
YLR030W	0.860382	0.757545	0.779634	0.324033	0.825633	0.463442	0.139629	-0.207938
YLR037C	1.1655	1.37801	-0.297914	-0.334938	-0.216529	-0.306841	0.0464528	-0.200557
YLR038C	0.605582	0.629281	0.25865	0.128792	0.178213	0.142406	-0.0808488	-0.3731
YLR039C	-1.5441	-1.36846	-1.38083	-2.10773	-1.65018	-1.63921	0.510554	0.254702
YLR045C	-1.19734	-1.48722	-0.934696	-1.12852	-0.817082	-0.964771	1.15875	0.604732
YLR048W	-1.14502	-1.48429	-0.775183	-0.863518	-0.705592	-0.820548	0.919646	0.505222
YLR051C	-0.730429	-0.818331	-1.06296	-1.37275	-0.541159	-0.883852	1.06752	0.89532
YLR053C	1.29464	1.26224	1.57047	1.47828	0.946982	0.508424	0.636524	0.806583
YLR055C	2.36496	2.52829	1.69186	1.67887	1.38212	1.42581	1.05772	0.694474
YLR058C	-1.01596	-1.46515	-0.550209	-0.823728	-0.374252	-0.581489	0.973565	0.773326
YLR060W	-1.75149	-2.08915	-2.36969	-2.53076	-2.18558	-2.6665	-0.00192442	-0.448341
YLR066W	-2.33133	-2.04926	-2.65525	-3.94362	-2.76459	-2.96046	0.712143	0.215895
YLR067C	-1.22155	-1.40306	-2.01981	-2.14119	-1.86676	-2.11309	0.853469	0.773985
YLR069C	-1.27782	-1.39213	-1.36481	-1.96477	-1.34238	-1.55794	0.415301	-0.158279
YLR075W	0.403301	0.508488	0.258912	0.465608	0.220857	0.570493	-0.0349118	0.10427
YLR076C	0.239144	0.27973	0.146607	0.234939	0.201462	0.238605	0.069647	0.0813539
YLR083C	-2.32813	-1.81361	-1.56636	-1.67353	-1.48677	-1.44238	1.34424	0.9793
YLR086W	-1.15553	-1.70043	-1.46753	-1.8542	-1.31708	-2.04242	1.46985	1.47819
YLR088W	-1.62155	-1.79714	-1.66271	-1.90106	-1.78419	-1.91045	0.499689	0.123824
YLR090W	1.76351	1.54248	1.33368	1.08283	1.08547	0.964855	0.881811	0.505197
YLR092W	1.2398	0.852443	1.04949	0.697687	1.12472	1.00096	-2.69615	-3.37326
YLR093C	1.53698	1.95566	1.10881	1.2734	1.089	1.23613	0.114884	0.00665607
YLR094C	3.088	3.55606	2.62825	2.62487	2.48825	2.79811	0.459497	0.105177
YLR101C	-0.881198	-0.892407	-1.72211	-1.8707	-1.82451	-1.69451	0.757088	0.159699
YLR107W	1.35914	1.29858	1.56241	1.48169	1.45758	1.65778	0.285122	0.213421
YLR108C	2.25279	2.63666	2.57235	2.54682	2.35802	2.56382	-0.903711	-1.40939
YLR109W	1.0681	1.58617	0.630388	0.84634	0.62734	0.956688	-0.209382	-0.112009
YLR110C	0.569703	0.755531	0.0135417	0.0807042	0.00755085	0.0162634	0.0093924	0.100092
YLR114C	1.08078	1.14523	1.49321	1.24218	1.26339	1.52256	0.207954	-0.217543
YLR120C	-0.743765	-1.26402	-0.556295	-0.798883	-0.624299	-0.891401	0.969098	0.672713
YLR120W-A	-2.2659	-1.24768	-0.530295	-0.0916383	-2.27947	-0.221651	1.67166	2.94165
YLR125W	1.96902	2.07541	0.551445	-0.409615	0.351396	0.302549	0.761561	0.676482
YLR126C	-0.895787	-1.86453	0.571206	-0.0233639	0.524963	0.390724	1.91596	1.58305
YLR129W	-1.79426	-1.62186	-1.89823	-2.52604	-1.74422	-1.92276	1.31881	0.574068
YLR130C	0.720973	0.613631	0.910474	0.61079	0.787571	0.811379	-1.96864	-2.6911
YLR142W	3.34239	3.5563	2.58522	2.28055	1.90932	2.01238	1.65716	2.03306
YLR149C	2.50067	2.95136	1.63673	1.70535	1.4577	1.6141	0.054468	-0.175131
YLR150W	-1.11491	-1.44612	-1.57512	-1.79078	-1.4658	-1.82499	0.938632	0.635658
YLR152C	1.90998	1.89475	1.57497	1.28759	1.58466	1.46605	-0.282781	-0.696041
YLR153C	-2.59371	-3.10273	-3.29205	-3.67108	-3.58187	-3.75074	0.644921	0.092395
YLR154W-E	1.32652	2.04927	0.977597	1.27762	0.932318	1.2702	-0.114351	0.0415998
YLR154W-F	1.31386	1.84084	0.92412	1.27636	0.883477	1.26709	-0.284111	0.0535389
YLR162W	1.7065	1.44304	1.01302	1.2226	1.13902	1.18777	-0.252646	0.319971
YLR164W	2.63188	2.15506	2.63778	1.55442	2.1791	2.23199	-0.277421	-0.553187
YLR168C	2.68762	2.53608	1.7724	1.7317	1.97137	2.21073	-0.588818	-0.935934
YLR175W	-1.44307	-1.55795	-1.27264	-1.92606	-1.75234	-2.0672	0.377899	-0.264569
YLR176C	2.36771	1.83694	1.40014	1.28603	1.13395	1.30092	-0.334875	-0.838372
YLR177W	1.78801	1.97168	1.21579	1.17736	0.929633	1.17197	-0.372849	-0.842123
YLR178C	1.10221	1.39288	0.634947	0.77812	0.519409	0.704827	-0.219911	-0.346563
YLR181C	-1.26669	-1.63719	-1.35575	-1.2525	-1.35669	-1.44448	0.922431	0.161812
YLR182W	-1.93154	-1.77591	-1.22068	-1.72227	-1.4086	-1.58845	0.260692	-0.508054
YLR185W	-0.51484	-0.613279	-0.370032	-0.616583	-0.331291	-0.359134	0.719576	0.309152
YLR189C	3.13423	3.46037	2.47285	2.45639	2.38058	2.39968	0.600046	0.12707
YLR193C	2.43462	2.66074	2.25637	2.19272	2.14561	2.64498	0.628854	0.441299
YLR194C	-0.95843	-1.43031	-0.805226	-0.851332	-0.88408	-1.00005	0.539057	0.860481
YLR195C	-2.02293	-2.28255	-2.12206	-1.92325	-1.79245	-2.19251	0.672193	0.124227
YLR196W	-1.74618	-2.09179	-1.70107	-2.3194	-1.64134	-2.29514	1.91999	1.23565
YLR197W	-3.02938	-3.06851	-2.87804	-3.42192	-3.15787	-3.30399	0.622893	0.518199
YLR199C	-1.07229	-1.6498	-2.10411	-2.13313	-2.164	-2.35265	1.3016	0.984087
YLR200W	-1.3547	-1.55051	-2.32625	-2.70843	-2.18036	-2.23914	0.841676	0.71039
YLR201C,YLR202C,YLR203C	0.875945	0.870276	0.562841	0.366849	0.514615	0.375845	0.170508	-0.0339501
YLR205C	-1.43146	-2.17365	-1.73052	-1.7073	-2.03015	-1.9303	0.173164	-0.0899836
YLR206W	0.979526	1.07778	0.423967	0.163052	0.149053	0.124692	-0.00778638	-0.468176
YLR208W	-1.41681	-1.38029	-1.03575	-1.21251	-1.09444	-1.56315	0.818721	0.179521
YLR209C	-0.511957	-0.400128	-0.562869	-0.583385	-0.623531	-0.911195	0.802322	0.544078
YLR211C	-1.02771	-1.84429	-1.96541	-2.04508	-0.803796	-1.2613	0.763638	0.481047
YLR216C	1.84649	2.34772	1.3096	1.36176	1.31097	1.61567	0.0433809	0.00962374
YLR217W	1.82315	2.29702	1.21707	1.47251	1.32589	1.64443	0.0871387	0.0538237
YLR219W	1.97934	1.90928	1.73479	1.66167	1.59795	1.60076	0.600581	0.225891
YLR222C	-1.92528	-2.58185	-2.7765	-2.03574	-1.9736	-2.48454	1.42248	1.51622
YLR224W	2.82734	3.08557	2.16415	2.09491	2.27396	2.27127	0.718374	0.433943
YLR225C	1.20915	1.27145	0.199827	0.0514625	-0.0996097	0.129121	-0.183789	-0.61891
YLR232W	-1.63852	-1.92748	-0.822012	-1.56878	0.00768228	-0.0407475	-0.50897	-0.703469
YLR233C	0.337962	0.304397	-0.0729871	-0.100106	0.172264	-0.463197	1.08401	1.08071
YLR243W	-2.32047	-2.42048	-3.28389	-3.02474	-2.53866	-2.60302	1.19545	0.708765
YLR245C	1.67998	1.78668	1.24187	1.27843	1.16623	0.703631	0.780209	1.0099
YLR246W	2.0935	2.02741	1.36407	1.07974	1.44428	1.37195	0.416494	-0.0254639
YLR248W	1.43366	1.63847	1.21123	0.996237	1.05212	1.02256	0.378821	-0.0262377
YLR249W	-0.78838	-1.15199	-1.31241	-1.59737	-1.28141	-1.664	1.32703	0.959378
YLR250W	0.613066	0.778863	0.499687	0.611937	0.506218	0.436815	0.0617025	-0.164888
YLR251W,YLR252W	0.715477	0.696345	0.763081	0.43981	0.517976	0.42558	-0.652756	-1.21699
YLR254C	1.52183	1.73854	1.00186	0.783768	0.709449	1.13815	0.509084	0.408892
YLR256W	1.98584	2.00398	1.70366	1.54975	1.5748	1.77762	0.393344	-0.154987
YLR257W	1.06888	1.39976	0.465805	0.548923	0.369429	0.447246	0.418055	0.477848
YLR258W	0.618488	0.410741	0.0554313	-0.0572513	-0.0784938	-0.150263	-1.12758	-1.811
YLR259C	1.78951	2.27669	1.26801	1.34446	1.16916	1.43682	0.26486	0.42247
YLR262C-A	0.952595	1.38039	0.530886	0.537482	0.590268	0.830262	0.0938257	-0.127845
YLR266C	3.18065	3.80879	2.58108	2.4901	2.57446	2.69988	0.385221	-0.00578837
YLR267W	3.24833	3.90423	3.08582	3.18873	2.82124	3.15763	0.312993	0.0971502
YLR270W	1.39478	1.57557	0.44465	0.524754	0.437836	0.501995	-0.368798	-0.928864
YLR276C	-2.26985	-1.99155	-2.64277	-3.31288	-2.54794	-2.99526	1.94054	0.734865
YLR277C	-1.30804	-0.860075	-1.84175	-1.71219	-1.41404	-1.70919	1.33883	0.690312
YLR284C	-0.0582241	0.270077	-0.300091	-0.405975	0.230826	0.021048	1.81908	1.54653
YLR290C	0.389371	0.277035	-0.274965	-0.347429	-0.0792751	-0.351579	-0.294378	-0.480212
YLR294C,YLR295C	1.97819	2.31383	1.32471	1.32181	1.11856	1.3836	-0.151485	-0.439973
YLR297W	1.96084	2.4724	1.61772	1.61031	1.53297	1.54292	0.285195	0.00454917
YLR298C	1.7754	1.8794	0.901314	0.590913	0.969807	0.368223	0.66334	0.16074
YLR300W	-0.473508	-0.867812	-1.94927	-2.05921	-2.07227	-2.41773	0.583513	0.371399
YLR301W	-1.82907	-1.88635	-1.44352	-1.20462	-0.885151	-0.896983	0.946327	0.549098
YLR303W	0.265944	0.243051	-0.0461681	-0.176365	0.000928966	-0.13978	-0.313991	-0.500266
YLR304C	1.19995	1.232	0.348036	0.230016	0.277026	0.290586	-0.555173	-1.15879
YLR305C	-0.795752	-1.00732	-1.58338	-1.91648	-1.64809	-1.90558	0.817171	0.404844
YLR311C	3.1089	2.41171	2.72336	2.71439	3.1395	3.4069	0.327442	-0.213873
YLR312C	2.67094	2.96198	2.13217	2.12808	2.2292	2.52398	0.138879	-0.170578
YLR315W	0.59912	0.374607	0.215778	0.046389	-0.26453	-1.05424	-0.239565	-0.362304
YLR316C	-0.252572	-0.203815	-0.0514937	-0.600162	-0.761207	-0.738127	0.815507	0.425233
YLR317W	0.397546	0.379481	-0.493977	-0.910447	-0.478717	-0.368885	0.804956	0.855685
YLR319C	-1.08857	-1.31098	-0.816861	-0.961689	-0.712226	-1.13383	1.16387	0.819633
YLR325C	0.776701	0.6497	0.189032	0.368532	0.309452	0.362637	0.218968	0.364676
YLR326W	1.47163	1.27577	0.578541	0.120091	0.374125	0.121144	-0.470814	-0.998836
YLR328W	2.11739	1.918	2.06673	1.99961	1.95995	1.97881	-0.355663	-0.801718
YLR330W	1.39159	1.44685	1.13292	1.04459	1.00602	1.06747	0.213007	-0.1231
YLR332W	1.8644	2.09948	1.55862	1.37538	1.36898	1.4497	0.395181	0.0880959
YLR333C	0.856921	0.930023	0.648061	0.694136	0.668773	0.89357	0.121833	-0.0268536
YLR334C	2.2994	2.1867	1.90554	2.42647	1.68524	3.70099	-1.12222	-1.36674
YLR337C	-0.543749	-0.398028	0.393554	0.126843	0.178977	0.027181	0.747376	0.324237
YLR342W	-2.15018	-2.56568	-2.4404	-2.8414	-2.72928	-3.00167	0.811123	0.195774
YLR343W	0.701413	0.837771	0.411658	0.0140039	0.583575	0.562177	-0.0726436	-0.265709
YLR344W	-0.657714	-0.563056	-0.0937396	-0.513021	-0.180659	-0.367678	0.256413	0.00434104
YLR345W	2.03586	2.26161	1.22418	1.20241	1.16412	1.28978	0.392763	0.0347894
YLR349W	1.46781	1.6957	1.12423	1.35854	1.23227	1.29847	0.32758	-0.331103
YLR350W	1.17353	1.5034	0.667091	0.648155	0.488036	0.654952	-0.0224251	-0.0516763
YLR352W	0.183887	0.0539867	-0.942874	-1.0275	-1.03086	-1.03953	2.29605	1.91256
YLR356W	0.763935	0.692672	0.511835	0.332376	0.372578	0.312102	-0.179373	-0.700087
YLR357W	0.201264	-0.0721466	0.825566	0.537036	1.00168	0.788908	1.5695	1.17575
YLR358C	0.559525	0.709885	1.88313	1.41245	1.80283	1.74665	2.20777	2.66538
YLR359W	-2.04124	-2.41939	-1.90869	-2.51542	-1.94213	-2.04739	0.218007	-0.0288814
YLR361C-A	1.75145	1.67108	0.787011	0.852107	0.835594	1.01971	0.323428	-0.0554762
YLR367W	-0.710185	-1.00173	-1.02726	-0.861803	-0.937898	-1.34985	0.88591	0.930661
YLR373C	-0.242008	-0.2783	-0.378905	-0.423341	-0.422563	-0.418518	1.69011	1.20267
YLR381W	0.689697	0.774652	0.822438	0.200684	0.407655	0.632974	2.6339	2.34185
YLR383W	-1.0516	-1.31442	-1.27621	-1.28835	-1.08217	-1.08328	1.40269	0.617784
YLR384C	-0.494569	-0.237497	-0.0982091	-1.0243	-0.200018	-0.424391	1.53029	0.987444
YLR390W-A	0.380534	0.338661	-0.0444481	-0.0454701	0.0182895	0.10185	-0.224365	-0.329272
YLR395C	0.997696	0.894984	0.64283	0.47958	0.51626	0.737194	-0.226854	-0.786042
YLR396C	-0.999395	-1.31055	-1.39382	-1.39931	-1.1325	-1.24204	0.346148	0.0849663
YLR397C	-0.248085	-0.459114	-0.52111	-0.695658	-0.685113	-0.532305	1.06924	0.788749
YLR399C	2.26759	2.4851	1.35939	1.39332	1.32618	1.41345	0.731821	0.543952
YLR399W-A	2.7792	2.33108	1.80931	1.7119	1.71082	0.896236	0.49542	1.1251
YLR402W	2.69274	2.5262	2.86067	3.53683	3.0153	3.04001	0.601235	0.171107
YLR403W	2.04362	2.25147	1.83222	1.67006	1.96598	2.28578	0.84867	0.244597
YLR405W	-1.00628	-0.790285	-0.616293	-0.342602	-0.411533	-1.04892	1.89423	1.36262
YLR406C	-1.20422	-2.00764	-1.83766	-1.98253	-1.90857	-1.99395	0.862343	0.731297
YLR407W	2.80018	2.72131	1.98294	1.7207	2.17619	2.01113	0.985952	0.922435
YLR418C	-2.37869	-1.93594	-2.22801	-2.21188	-2.14373	-2.66612	1.09719	0.885095
YLR419W	-1.81232	-1.43991	-1.48306	-1.84981	-0.961834	-1.17275	1.24637	0.410265
YLR420W	-0.921515	-0.90309	-0.99141	-1.24095	-0.8477	-0.791413	0.993409	0.482251
YLR421C	1.32993	1.47347	0.763014	0.622839	0.891511	0.700674	0.80965	0.775419
YLR423C	-1.72858	-1.60344	-1.52562	-1.69378	-1.43058	-1.34499	0.777512	0.0411073
YLR424W	-0.480528	-0.900541	-0.372833	-0.382246	0.180521	-0.148881	1.32117	0.791264
YLR427W	0.283565	0.354508	-0.0690732	-0.488436	-0.0760689	-0.627724	0.946382	1.27146
YLR432W	-1.60792	-1.64276	-1.30817	-1.76389	-1.57669	-1.53053	1.06544	0.261498
YLR435W	-1.12982	-0.796848	-1.91489	-1.71203	-1.56376	-1.05036	1.64012	1.1774
YLR436C	1.99924	2.11771	1.42627	1.11572	1.24745	1.30922	0.477753	0.0215259
YLR437C	2.40786	2.9147	1.84531	1.8152	1.83715	1.77899	0.555683	0.448893
YLR437C-A	4.14248	5.71667	2.9609	3.62475	2.95557	3.33209	1.14297	1.36314
YLR438W	4.06315	4.78221	3.00166	3.06523	2.72692	3.06295	0.679193	0.808758
YLR441C	-0.490875	-0.68167	-0.611732	-0.836394	-0.536177	-0.610653	0.923812	0.79814
YLR442C	-2.44983	-1.36593	-2.17647	-2.24315	-2.49041	-1.85541	0.906723	0.635351
YLR448W	-1.47818	-2.02938	-1.39966	-1.62297	-1.29535	-1.52036	0.976408	0.583199
YLR449W	-2.43539	-2.8704	-2.51199	-2.99623	-2.89393	-2.69564	1.16595	0.578106
YLR451W	-0.65976	-0.553167	-1.42168	-1.50202	-1.08149	-0.756892	1.37686	1.09718
YLR455W	1.79088	1.59763	1.48874	1.54588	1.47255	1.64978	0.372162	-0.316714
YML002W	1.28806	1.18615	0.532247	0.214911	0.510926	0.650902	-0.633927	-1.10976
YML003W	1.18621	1.13285	1.06498	0.756491	0.945427	0.588372	-1.09686	-1.3455
YML004C	2.02068	2.73196	1.50487	1.69737	1.40087	1.76921	-0.297777	-0.460079
YML007W	1.89485	2.15941	1.19287	1.17707	1.14308	1.38139	1.14296	1.04036
YML008C	-1.46209	-1.81402	-1.68034	-1.9138	-1.77938	-2.17776	0.703074	0.290097
YML009C	1.96173	2.19081	1.36489	1.39105	1.46836	1.68169	0.0784739	-0.17824
YML012C-A	-0.347133	-0.606096	-0.696242	-1.28085	-0.876733	-0.889321	1.59962	0.94515
YML014W	-0.909296	-0.657647	-1.23173	-2.00099	-1.25453	-2.11553	0.919046	0.673467
YML015C	-1.71615	-1.57768	-2.30227	-2.66025	-1.71185	-2.17081	0.986927	0.523099
YML016C	-1.94733	-2.14003	-3.51859	-3.27335	-3.33792	-3.14437	-0.518964	-0.781628
YML019W	-2.35624	-2.22911	-2.49004	-2.60641	-2.49957	-2.98544	0.425473	0.764691
YML024W	-0.119324	-0.495291	-0.108323	-0.102577	-0.0798975	-0.249174	1.02821	1.11403
YML025C	1.51882	1.5978	0.895531	0.572035	0.695221	0.741702	0.693091	0.447511
YML026C	-0.401594	-0.632123	-0.563429	-0.549602	-0.464762	-0.613926	0.71733	0.486983
YML032C	-0.789724	-0.601929	-1.15578	-1.69619	-1.13479	-1.38299	2.04246	1.56629
YML034C-A	2.43541	2.90192	1.73026	1.81814	1.32152	1.56581	0.310505	0.158258
YML034W	2.41861	2.81133	1.69689	1.64671	1.59196	1.7103	0.249285	0.0192387
YML042W	2.12698	2.3019	0.883217	0.494194	0.702264	0.674018	0.0727117	-0.491757
YML043C	1.54757	1.30627	0.610506	0.264194	1.07654	0.384008	0.491728	0.0262146
YML047C	1.18758	1.0721	0.371906	-0.254386	0.257078	-0.485404	-1.10741	-1.75346
YML048W	1.45752	1.57227	0.371589	0.204931	0.251866	0.0558012	0.540956	0.0953237
YML049C	-0.541113	-0.520216	-0.571888	-0.860833	-0.573483	-1.04086	1.31208	0.94652
YML051W	1.57238	1.35059	0.630453	0.491872	0.57683	0.629141	0.0780359	-0.488617
YML052W	1.05601	1.05515	0.130914	-0.21686	0.0368071	-0.0305854	-0.765468	-1.28138
YML053C	0.55317	0.231876	0.570503	0.133724	0.214651	0.422091	-0.517015	-0.90974
YML054C	1.25982	1.43555	1.18288	1.21367	0.853238	0.960393	-0.667997	-1.1389
YML058W	1.21131	1.6087	0.657883	0.743909	0.785955	0.83435	0.0250921	0.138363
YML062C	-1.35615	-1.75103	-1.46148	-1.44121	-1.06977	-1.42058	1.27584	0.467738
YML063W	-0.453045	-0.664801	-0.584535	-0.698008	-0.639627	-0.879448	1.17452	1.06582
YML065W	-0.318203	-0.735399	-0.155503	-0.831327	-0.277543	-0.133533	1.19269	0.703981
YML069W	-0.771758	-1.00442	-0.371882	-0.459193	-0.186591	-0.32041	0.863992	0.755584
YML070W	0.452314	0.371078	0.0729786	-0.180026	0.0457011	-0.0362697	-0.78717	-1.46798
YML072C	-2.18988	-2.41453	-2.16438	-2.44545	-2.26911	-2.79796	-0.024504	-0.696531
YML073C	-0.74922	-0.917522	-0.763015	-0.728176	-0.555264	-0.814764	0.881058	0.784493
YML074C	-0.701399	-0.982379	-1.15984	-1.33607	-1.18869	-1.39627	0.772458	0.369158
YML075C	-2.72158	-2.9388	-3.47154	-3.55579	-3.79079	-3.70251	1.89784	1.50804
YML080W	0.245782	0.454593	0.841441	0.607404	0.99215	0.410125	1.59113	1.22356
YML081C-A	1.62843	1.99752	1.15322	1.32251	1.38262	1.28167	0.161384	0.172119
YML086C	-1.80477	-2.24453	-2.1599	-2.6081	-2.26316	-2.38449	1.01387	0.210568
YML089C	6.55019	8.18083	5.68036	5.53395	5.768	5.77155	-0.284154	-0.956006
YML090W	3.51059	4.10193	4.36797	4.21519	3.60485	4.87941	-0.118461	-1.20793
YML091C	2.80204	3.05809	2.50677	2.39202	2.3205	2.60011	-0.256212	-0.823045
YML092C	-0.0692528	-0.239316	-0.242007	-0.390689	-0.260449	-0.413172	0.931349	0.786263
YML093W	-2.32622	-4.08034	-2.63132	-2.77823	-2.14892	-2.43974	2.43907	1.99787
YML096W	-0.712504	-1.30627	-1.3227	-2.16989	-1.13237	-1.67252	0.532516	0.603316
YML097C	-1.67792	-2.64462	-1.86078	-1.31826	-0.772535	-1.33916	1.21662	1.12773
YML099C	0.656096	0.834767	0.845167	0.42507	0.701904	0.617089	1.62131	1.36104
YML100W	1.36071	1.56275	0.912174	0.999454	0.775295	1.00979	-0.15857	-0.339759
YML101C	2.13342	2.18655	1.7781	1.61166	1.41944	1.73119	-0.196962	-0.419541
YML101C-A	1.44441	1.19348	0.56359	0.33828	0.637402	0.0294226	0.146868	0.36751
YML103C	-1.58099	-1.90114	-2.55617	-3.00536	-3.0356	-2.84386	-0.067765	-0.356929
YML112W	-0.520403	-1.07216	0.175758	-0.0517904	0.322861	0.211456	0.926248	0.608391
YML114C	-0.411245	-1.20135	-1.79939	-2.00177	-1.92026	-1.98626	1.39847	0.97168
YML120C	1.85222	2.0381	1.06341	1.016	0.852299	0.909836	0.000457851	-0.430074
YML122C	2.03034	1.66628	1.34596	1.02371	1.92962	0.846846	-0.696114	-1.46144
YML123C	-0.558694	-0.475867	1.31225	1.09594	1.41034	1.77969	1.23235	0.700301
YML125C	-0.48393	-0.632494	-0.787897	-1.19512	-0.76491	-1.00711	1.4448	1.20137
YML126C	-1.44298	-1.98996	-2.7747	-2.82457	-2.82455	-2.88355	1.23542	0.815957
YML127W	2.94373	2.80796	1.92493	1.67855	1.77564	1.82705	-0.791662	-1.70442
YML128C	1.67269	2.2967	0.868448	1.01179	0.726273	0.939617	-0.420977	-0.653357
YML129C	1.30815	1.95272	0.943849	1.18666	0.85218	0.934831	0.120192	0.263829
YML130C	1.33114	1.45842	0.749336	0.555378	0.705878	0.790536	0.312652	-0.161064
YML131W	1.29796	1.50736	1.40832	1.509	1.30575	1.42552	-0.486251	-0.695095
YMR002W	1.73798	2.30987	1.14762	1.20635	0.969984	1.24781	0.190583	0.226826
YMR003W	2.53645	2.88429	2.12152	2.00012	2.08861	2.05953	1.12036	0.377476
YMR011W	0.0799239	-0.0126739	-0.069468	-0.0499207	0.0445281	0.055103	0.693601	0.959607
YMR012W	-1.72564	-2.18476	-2.22351	-2.65383	-2.02336	-2.3584	0.927815	0.330398
YMR014W	-1.86395	-2.11416	-2.15661	-2.9464	-1.78435	-1.67362	2.17256	1.15531
YMR015C	-2.54742	-3.22494	-4.21666	-4.39599	-4.10197	-4.41152	0.847913	-0.118145
YMR016C	-0.46495	-0.551287	0.232414	0.12174	0.125391	0.14923	1.66798	1.04417
YMR020W	1.60549	1.54509	1.66396	1.67024	1.71243	1.86544	0.653162	0.229109
YMR021C	2.84464	3.09428	2.1129	1.6278	1.94433	2.28254	0.768211	0.55531
YMR022W	1.36291	1.56995	0.954024	0.97219	0.769605	0.760671	0.680888	0.502959
YMR026C	-0.0769514	0.114606	-0.405449	-0.989589	-0.40599	-0.86967	1.26023	1.25668
YMR027W	1.57872	1.80139	0.401017	0.309024	0.358448	0.380533	0.455965	0.121324
YMR030W	2.14844	2.22483	1.76787	1.74239	1.80742	1.68997	0.861628	0.18552
YMR031C	1.50732	1.75076	0.846735	0.808024	0.68417	0.79697	0.14073	-0.242776
YMR034C	2.36836	2.36698	2.52381	2.40232	2.52973	2.67157	1.66773	1.55728
YMR036C	3.50562	3.81105	2.96895	2.95774	2.81712	2.94834	0.793866	0.722337
YMR037C	2.49476	2.55733	1.89351	1.77704	1.87859	1.79294	0.676901	0.331674
YMR038C	1.44666	1.30819	1.55978	1.39842	1.35177	1.70286	0.194534	-0.347137
YMR039C	1.50115	1.8183	1.21725	1.32245	1.27085	1.38171	0.0683403	0.111243
YMR040W	2.13114	2.15212	2.39419	2.47708	2.29848	2.1201	0.924914	0.723609
YMR041C	2.52512	2.70395	1.63267	1.59984	1.4388	1.56365	-0.0417854	-0.389692
YMR042W	2.76383	2.87998	2.38648	2.11087	2.07772	2.25506	0.352516	0.250535
YMR043W	2.60871	2.84016	2.28931	2.20642	2.11013	2.20405	0.0862712	-0.165317
YMR044W	2.75892	2.9222	2.46644	2.68702	2.31503	2.58115	0.585239	0.433904
YMR045C	0.924494	0.964839	0.0691128	0.188463	0.153856	0.391046	-0.404137	0.0490934
YMR049C	-2.15788	-2.65727	-1.36915	-2.09918	-1.47254	-2.08568	1.1873	1.49975
YMR052W	0.903374	0.962306	0.845125	1.06916	1.45062	0.788724	0.400549	0.274178
YMR056C	2.19272	2.30521	2.55355	2.3303	2.31419	2.35912	1.0811	0.78974
YMR062C	1.63444	1.74853	0.909376	0.876215	0.952109	0.908438	0.765166	0.501517
YMR066W	-0.0180879	0.419954	1.14355	0.994694	1.17734	1.18951	1.51848	1.53649
YMR069W	2.11472	2.52995	0.994315	0.704411	0.945728	0.738735	0.530004	0.387496
YMR070W	2.19829	2.29216	1.58704	1.53971	1.39384	1.41518	0.390885	0.027178
YMR073C	1.15435	1.12702	0.380327	0.0791679	0.223131	0.270589	-0.0910368	-0.311681
YMR076C	-0.0331962	0.264096	-0.62177	-0.888576	-0.763404	-0.796966	1.5154	1.16086
YMR079W	-2.04162	-2.66996	-2.49075	-2.98044	-2.60738	-2.88224	1.4213	0.980785
YMR081C	0.528009	0.351145	-0.0183486	-0.0336598	-0.0793111	-0.15844	-0.600749	-1.13365
YMR083W	1.00988	1.17148	0.633518	0.681232	0.576703	0.726978	0.28794	0.262548
YMR084W	2.272	2.39035	2.80982	2.94713	2.36583	2.34409	0.883082	0.630745
YMR085W	2.29508	2.33059	2.21844	2.0792	2.06913	2.15324	0.721341	0.571864
YMR088C	0.648379	0.503128	0.83002	0.430274	0.547626	0.385949	2.08469	1.64756
YMR090W	1.28234	1.65925	1.43097	1.43798	1.25598	1.49141	-0.558952	-0.981727
YMR092C	-1.24195	-1.6031	-1.45045	-1.71426	-1.47486	-1.59314	0.275118	-0.178528
YMR093W	-0.4341	-0.54298	-0.472387	-0.88661	-0.386149	-0.413504	0.72093	0.761048
YMR099C	-1.25422	-1.57226	-2.29084	-2.5523	-1.94893	-2.59766	0.799081	0.431767
YMR102C	-1.66344	-1.63182	-0.928533	-1.43146	-0.778321	-1.07204	0.656687	0.181455
YMR103C	0.834792	0.77441	0.252974	0.141746	0.0569042	0.18176	-0.166541	-0.547472
YMR104C	0.597482	0.596641	0.150412	0.0962735	0.0846302	0.140686	-0.222382	-0.552832
YMR105C	0.957883	1.13685	0.824463	0.945309	0.721927	0.885435	-0.703866	-1.18178
YMR107W	1.89464	2.89689	1.56706	1.77477	1.19368	1.6184	-0.16328	0.179536
YMR108W	1.82153	1.98392	1.46291	1.41685	1.38101	1.51846	1.04184	1.07955
YMR109W	-2.02994	-2.60477	-1.267	-2.03191	-1.45097	-1.40792	0.29062	-0.28742
YMR114C	2.35824	2.86342	1.58877	1.39463	1.45762	1.48106	1.18984	1.02211
YMR118C	1.40567	1.60618	0.816449	0.975802	0.893587	0.847278	0.042537	-0.235369
YMR121C	1.53009	1.53422	1.68849	1.77463	1.54273	1.62763	0.628286	0.504604
YMR124W	-1.27101	-1.65577	-1.23123	-1.69568	-1.22704	-1.4571	0.330428	0.178233
YMR128W	-1.52415	-1.78841	-1.13027	-0.935475	-0.619502	-1.20468	1.63495	1.03791
YMR130W	-0.159194	-0.528827	-0.0387666	-0.526291	-0.120039	0.0187462	1.41104	1.2423
YMR131C	-2.50707	-3.00429	-2.73933	-3.06715	-3.04219	-3.23107	1.61733	0.629137
YMR133W	0.706023	0.624584	-0.304336	-0.283774	-0.274294	-0.163432	-0.798847	-1.34356
YMR134W	-1.02337	-0.877875	-1.19841	-1.37198	-1.47051	-1.80157	0.135986	0.00934414
YMR135C	2.15405	2.55427	1.77316	1.62348	1.62029	1.59686	0.585236	0.247469
YMR140W	1.48097	1.34531	0.987128	0.963698	0.883461	0.997583	0.356135	-0.0737107
YMR141C	1.70249	1.28891	0.663525	0.586191	0.830202	0.841061	0.332288	-0.109307
YMR142C	0.139337	-0.0414319	0.136026	0.0999378	-0.00489088	0.0054541	0.567906	0.508958
YMR143W	-0.166736	-0.459937	-0.426435	-0.533562	-0.337529	-0.442025	0.625769	0.579963
YMR159C	0.0386744	0.28349	0.753264	0.9734	0.722369	-0.113541	0.837616	0.854882
YMR161W	2.56317	2.67346	2.22714	2.18819	2.06718	2.3337	1.16295	0.872651
YMR165C	2.08936	2.14933	1.19519	0.910875	0.7988	0.817543	0.474965	-0.162855
YMR168C	1.055	1.49768	0.566922	0.436126	0.477441	0.342378	0.265979	0.0295665
YMR169C	2.81459	3.29622	2.40598	2.48724	1.78967	2.08101	-1.22863	-1.88141
YMR171C	2.16294	2.09307	1.26409	1.17832	1.21118	1.25074	0.419267	-0.205166
YMR172C-A	1.38614	1.15832	0.485821	1.49103	0.832515	0.766838	0.481222	0.123897
YMR173W,YMR173W-A	0.629476	0.606375	0.740662	0.722028	0.619191	0.753459	-0.306141	-0.470336
YMR174C	1.69871	2.5522	0.560634	0.749183	0.478795	0.676299	-0.111612	0.0999206
YMR175W	3.07636	2.97589	1.23888	1.55923	1.2774	1.39008	-0.092397	-0.150659
YMR181C	1.7216	2.00389	1.13816	1.05099	0.95127	1.12338	0.102972	-0.122286
YMR182C	1.76265	1.68861	1.28232	1.50339	1.04036	1.2269	-0.357783	-0.8183
YMR184W	0.790799	0.62314	0.45228	0.219413	0.489467	0.200523	-0.181829	-0.624702
YMR185W	2.17402	2.26873	2.17753	1.89637	2.20605	2.00404	1.07747	0.587689
YMR186W	1.52445	1.89444	1.03952	1.08378	1.01639	1.19259	0.0609597	0.158109
YMR188C	2.17418	2.51875	1.50661	1.49366	1.41861	1.73585	0.55272	0.407481
YMR193C-A	1.57591	1.52672	1.73248	1.14063	1.58705	1.22766	0.758121	0.438751
YMR194C-A	2.72273	1.83829	3.09465	2.71004	2.46525	2.79292	-1.32419	-2.13063
YMR194C-B	1.99137	2.43494	1.99513	1.80746	1.57296	2.52173	-0.145993	-0.333616
YMR195W	2.28813	2.48605	2.55519	2.56396	2.31831	2.65527	-0.966485	-1.60618
YMR196W	1.3746	1.41652	0.267562	0.0562363	0.0842108	0.0638339	-0.859748	-1.47376
YMR201C	2.13948	2.25703	1.36181	1.12791	1.10621	1.33095	0.618816	0.239249
YMR202W	-0.775835	-1.25166	-1.52001	-1.74897	-1.587	-1.89848	0.31384	0.115433
YMR205C	-1.26333	-1.86178	-1.1305	-1.40909	-1.23127	-1.4163	0.244776	-0.182894
YMR206W	2.39295	2.43785	1.71601	1.56788	1.35281	1.43119	0.553536	0.171879
YMR208W	-1.93095	-2.07628	-2.10301	-2.54562	-2.54067	-2.98601	1.25553	0.422789
YMR212C	-0.988276	-1.46064	-1.88121	-2.4348	-1.63751	-2.04637	1.17954	0.584253
YMR214W	-2.24228	-3.09363	-1.3164	-1.4981	-1.31487	-1.75345	1.96147	1.03806
YMR215W	-1.59051	-1.62452	-0.76184	-1.25208	-0.760471	-0.795136	1.66787	0.827309
YMR216C	2.34288	2.35002	1.85304	1.64788	1.77231	1.87102	1.31512	0.914853
YMR217W	-1.47524	-2.41216	-2.68888	-3.17559	-2.54913	-2.93543	0.625208	0.127889
YMR218C	-2.67175	-2.30465	-1.57217	-1.63427	-2.29562	-1.81945	1.1198	0.386992
YMR219W	-0.801147	-0.970498	-0.893733	-1.02139	-0.815141	-1.12192	1.00809	0.381922
YMR227C	-0.356559	-0.536231	-0.602344	-0.511606	-0.358097	-0.624329	1.59964	1.61544
YMR228W	-1.09612	-1.0676	-1.19167	-1.45355	-0.357029	-1.23365	1.64002	0.779201
YMR229C	-1.91333	-2.1336	-1.85777	-2.00968	-1.84686	-1.72999	1.02332	0.0847196
YMR235C	-0.482005	-0.614083	-0.570405	-0.943447	-0.452907	-0.919986	0.917464	0.61815
YMR238W	-1.59215	-1.9509	-2.08224	-2.13036	-2.0236	-2.13093	2.33264	1.8232
YMR240C	2.35898	2.2182	2.18076	2.13501	2.00416	2.20112	0.816789	0.689835
YMR242C	-0.249676	-0.385121	-0.23465	-0.504552	-0.310661	-0.345647	0.842944	0.59054
YMR243C	1.4114	1.41557	1.06651	0.936304	0.928952	1.00877	0.588285	0.255572
YMR245W	1.06084	1.10982	1.38285	1.15098	1.17026	1.30573	0.691507	0.541802
YMR251W	2.51313	2.64293	3.02184	3.0287	2.98936	2.64853	0.445359	0.1617
YMR252C	2.627	3.0737	1.50747	1.64899	1.62071	1.80112	0.05598	-0.0821814
YMR253C	3.10198	3.36142	2.20042	1.82221	1.90131	2.09835	-0.0454124	-0.612315
YMR254C	4.92555	5.53713	3.56758	2.9896	2.93343	2.14382	-0.933009	-0.839273
YMR255W	1.92491	2.37632	1.34762	1.41486	1.35394	1.57563	0.781766	0.763524
YMR256C	1.65972	2.55332	1.1061	1.30501	1.06165	1.46895	-0.0842479	0.14005
YMR260C	-1.23277	-1.89858	-1.80894	-2.47513	-1.90403	-2.17073	0.650576	0.341804
YMR263W	-1.39247	-1.84916	-1.6098	-1.69642	-1.69238	-1.79659	0.0958459	-0.336971
YMR266W	0.0883006	-0.0464908	0.289068	0.0263457	0.194772	0.0967737	1.6919	1.43158
YMR267W	-1.70627	-2.14466	-2.3544	-2.25571	-2.21483	-2.14855	-0.0336139	-0.479413
YMR271C	1.30721	1.72407	1.28999	1.28851	1.15372	1.2972	-1.10796	-1.86407
YMR272C	2.00549	2.37552	1.47031	1.40615	1.47569	1.52837	-0.0439911	-0.186967
YMR272W-A	1.95479	2.07623	1.32283	1.48636	1.15675	0.904238	0.136002	-0.809422
YMR273C	-0.924832	-0.767783	-1.11365	-1.45803	-1.31524	-1.18357	0.726518	0.466422
YMR274C	-1.96803	-1.69834	-2.21496	-2.32756	-1.64135	-2.35794	-0.161766	-0.665236
YMR276W	0.831587	0.85742	0.289695	0.322137	0.317222	0.367912	1.4199	1.23948
YMR280C	2.34033	2.47678	2.4554	2.19146	2.11132	2.12302	0.664299	0.227445
YMR281W	2.26636	2.66884	2.15279	2.07238	2.06054	2.34793	0.405418	0.423073
YMR286W	1.59109	2.23523	0.941453	0.752916	0.967019	0.934502	0.305131	-0.138744
YMR288W	-1.08074	-0.988319	-0.742021	-1.60175	-0.844688	-1.30829	0.630406	0.401128
YMR290W-A	1.06793	1.67083	2.22232	2.25066	2.46101	2.48064	-1.83213	-1.87958
YMR291W	2.27782	2.54201	2.39149	2.36709	2.09174	2.50066	-0.501939	-1.08452
YMR295C	1.5684	2.10925	0.901275	1.03082	0.945673	1.10288	0.262353	0.296965
YMR297W	0.798741	1.02857	0.309691	0.244962	0.234532	0.265148	-0.112192	-0.336007
YMR298W	1.14076	1.00143	0.471128	0.286545	0.573628	0.466792	0.0136173	-0.538983
YMR302C	2.10845	2.17939	1.45038	1.36535	1.36841	1.12294	0.520155	0.216627
YMR304C-A,YMR305C	-1.13891	-1.60958	-1.82292	-2.00597	-1.93693	-1.80547	1.18071	0.825036
YMR304W	1.03629	1.04057	1.66153	1.31731	1.64848	1.65115	0.513073	0.214568
YMR307W	-1.61483	-2.03066	-1.52173	-1.84378	-1.49738	-1.68081	-0.138482	-0.497388
YMR309C	-1.92527	-1.93717	-2.08781	-2.25115	-1.69451	-1.55298	1.14256	0.489957
YMR311C	1.65535	2.15119	0.977241	1.03841	0.954831	1.03398	0.150739	0.140284
YMR313C	3.20058	3.34658	2.64314	2.26565	2.38017	2.40535	0.465896	-0.111617
YMR314W	1.365	1.54181	0.966732	0.946585	0.835958	0.933161	0.411811	0.397779
YMR315W	1.31654	1.6215	0.759334	0.75049	0.714171	0.753701	-0.138172	-0.262848
YMR316C-A	0.0251773	-0.198707	-0.421487	-0.381479	-0.174743	-0.350337	1.95631	1.50766
YMR316W	-0.0874939	-0.184388	-0.0329437	-0.436288	-0.140895	-0.240726	1.3787	1.41672
YMR317W	1.31979	1.2332	0.645974	0.372996	0.500611	0.417721	-0.0227203	-0.667434
YMR320W	3.42989	2.96336	1.29012	1.17536	1.35028	1.7664	-0.291388	-1.68414
YMR323W	2.61192	2.20257	1.7398	0.818807	1.33119	1.45705	-1.37075	-2.38398
YNL001W	1.81841	1.79875	1.28636	1.06459	1.26952	1.12266	0.188105	-0.108612
YNL005C	1.94079	2.06895	1.37406	1.35692	1.28838	1.47503	0.428419	0.0681294
YNL006W	2.16489	2.31014	1.70832	1.52604	1.61058	1.64906	-0.1578	-0.628726
YNL007C	2.25444	2.7314	1.62573	1.69959	1.67308	1.87589	0.213658	0.462582
YNL009W	2.5793	2.39947	1.45295	1.28804	1.54994	1.68183	0.728774	0.462959
YNL011C	0.350383	0.443627	-0.0452484	-0.623202	-0.466385	-0.179898	-0.850271	-1.45835
YNL012W	1.86162	1.92067	1.57569	1.49463	1.66486	1.34236	0.0253003	-0.537249
YNL014W	3.52844	3.74543	3.09039	3.0096	2.95668	3.11939	1.19441	1.04767
YNL015W	1.17175	1.54528	0.720557	0.651003	0.609917	0.582695	-0.0974649	0.179887
YNL024C-A	1.22428	1.1795	1.19807	0.99094	1.13431	1.35564	0.313964	0.21124
YNL034W	-0.0736707	-0.448897	0.700782	0.170739	0.149283	0.743031	1.80638	1.24248
YNL036W	2.6951	3.59824	1.60054	1.7738	1.44064	1.83559	-0.147732	0.051018
YNL037C	0.754646	0.844036	0.55193	0.480165	0.501036	0.51321	-0.927852	-1.63253
YNL042W	1.24972	1.05531	1.01469	1.0017	0.931062	0.731268	-0.767155	-1.34249
YNL042W-B	1.43344	0.789757	1.59904	0.844951	1.11247	0.84186	-0.587352	-0.809831
YNL044W	-0.370638	-0.567801	0.112194	-0.0665606	0.196471	0.106649	1.08572	1.16938
YNL046W	1.46805	1.68467	0.486592	0.143517	0.191327	0.00279263	-0.0546359	-0.476372
YNL049C	-0.663195	-0.817437	-0.607173	-1.30951	-0.982065	-1.0934	1.22477	0.771435
YNL050C	-0.902256	-1.21746	-1.18494	-2.14695	-1.47061	-1.70606	0.915212	0.479411
YNL052W	2.20097	2.48672	1.35256	1.46579	1.1628	1.33346	0.135091	-0.244396
YNL055C	0.804751	0.921909	0.358066	0.345304	0.268913	0.343145	-0.342135	-0.551558
YNL059C	-2.1411	-2.21093	-2.18407	-2.83102	-2.19714	-2.4448	0.598905	-0.00598075
YNL061W	-1.68071	-1.77806	-2.06809	-2.70016	-2.05724	-2.34659	1.81012	0.939841
YNL063W	1.64482	1.6961	1.55732	1.49314	1.44376	1.34657	0.19776	-0.559634
YNL064C	1.4651	1.8173	1.14108	1.12397	1.28878	1.45905	0.64761	0.640882
YNL067W	-0.08046	-0.103631	0.701194	0.762506	0.810323	0.803968	1.39123	1.30539
YNL069C	-0.670046	-1.09964	-0.294249	-0.50766	-0.451559	-0.461866	0.46677	0.199857
YNL074C	2.01116	2.19826	1.21841	1.12697	1.02371	1.1745	0.529201	0.304457
YNL076W	1.83227	1.90327	1.48041	1.24742	1.35755	1.40722	0.486246	0.019763
YNL077W	3.0532	3.91137	2.53949	2.63734	2.4061	2.86082	0.0388821	0.205639
YNL079C	0.799143	0.873499	0.160004	0.0793988	0.140981	0.152652	0.0696403	-0.0541851
YNL080C	1.79262	1.73777	1.69855	1.23702	1.44164	1.45485	0.739823	0.127691
YNL081C	1.0723	1.2097	0.478176	0.608008	0.772072	0.670227	-0.11946	-0.193094
YNL085W	-1.24839	-1.85805	-2.03727	-2.18896	-1.56176	-1.74552	1.12313	0.450928
YNL087W	-1.37348	-2.00507	-1.66389	-1.52883	-1.49341	-1.49295	1.26721	0.754519
YNL091W	0.457806	0.308728	0.403403	0.135916	0.15272	0.251015	1.45725	1.22468
YNL093W	1.7253	1.93313	2.4722	2.47107	2.52053	2.29958	0.359766	0.368506
YNL097C	1.51481	1.30214	0.127861	-0.192263	-0.0344306	-0.0727957	-0.334439	-1.0527
YNL097W-A	1.5543	1.15226	0.232961	0.222551	0.176482	-0.627575	-0.191061	-0.667773
YNL098C	1.88278	2.40154	1.55377	1.67847	1.51247	1.80283	0.050312	-0.0854657
YNL099C	1.94615	1.85698	1.6241	1.56008	1.41481	1.67835	0.364445	0.108265
YNL100W	1.58379	1.74176	1.02866	0.953015	0.942095	1.04875	-0.17276	-0.797194
YNL101W	2.49195	2.60226	1.7671	1.58701	1.5462	1.749	1.45187	1.13539
YNL103W	2.90211	3.35398	2.27652	2.30264	2.27369	2.30654	1.04684	0.73762
YNL110C	-0.134776	-0.578079	-0.507743	-0.897023	0.0807968	-0.287019	1.09206	0.977257
YNL112W	-1.14449	-1.14601	-1.53685	-2.32377	-1.62234	-2.40184	2.0808	2.38551
YNL115C	1.19659	1.10346	0.286983	0.090351	0.19484	0.0269688	0.392082	0.14423
YNL116W	2.76955	2.67004	1.86809	1.78398	1.87921	1.76036	0.887365	0.665916
YNL117W	-0.384565	-0.222007	0.562335	0.263027	0.672773	0.426688	1.82149	1.53665
YNL119W	-0.482253	-0.532613	-2.33467	-1.46647	-0.791168	-1.64972	1.85405	1.2176
YNL121C	-0.97244	-1.72587	-1.46976	-1.72595	-1.51145	-1.31705	1.29669	1.10375
YNL123W	-0.924766	-1.0401	-0.618919	-1.19615	-0.501405	-0.741683	1.66423	1.35873
YNL124W	2.44559	2.40447	2.54735	2.03588	2.32743	2.64144	1.05094	0.729078
YNL125C	2.84601	2.82698	1.93454	1.79413	1.77749	1.97919	0.718481	0.450696
YNL129W	-0.980623	-0.867025	-1.40626	-1.84364	-0.76113	-1.13142	1.39513	1.19282
YNL130C	-0.061572	-0.451665	-0.484152	-0.807839	-0.554305	-0.890794	2.09651	1.64881
YNL133C	2.47941	2.49832	1.93036	2.10363	2.04584	2.0657	0.668173	0.490066
YNL134C	0.420263	0.500552	0.884972	0.986875	0.708148	0.837273	-0.387666	-0.822894
YNL137C	0.649281	0.402893	0.0921708	-0.225861	0.150079	0.0857566	1.21423	1.09372
YNL141W	-1.37683	-2.17396	-0.854051	-0.937291	-0.819129	-0.817765	1.97931	1.53135
YNL143C	5.6309	5.53775	4.91108	3.16869	4.18466	3.48537	1.2972	1.4555
YNL144C	2.49268	2.85858	2.07884	2.10394	1.89434	2.07491	-0.139987	-0.441903
YNL146C-A	4.52608	4.09331	4.81003	4.23317	2.71748	3.41778	-0.209198	1.10898
YNL147W	1.351	1.55333	0.887537	0.910211	1.04823	0.768657	0.084702	-0.133066
YNL153C	-0.243117	-0.166867	-0.617632	-1.0455	-0.544765	-0.629763	0.326745	0.203401
YNL155W	2.58123	2.43074	0.900349	0.686165	0.889431	0.712842	0.788092	0.659013
YNL156C	1.4532	1.51701	0.616155	0.502229	0.571185	0.585903	0.777157	0.519026
YNL158W	2.07732	1.98903	1.28532	1.07584	1.39358	1.13166	0.719263	0.192046
YNL159C	1.54831	1.73401	1.36971	1.04651	1.10297	1.10974	0.383028	-0.00415448
YNL160W	0.714848	0.899396	-0.471393	-0.5406	-0.447253	-0.603293	-0.162864	-0.189993
YNL162W	-0.319777	-0.367495	-0.555648	-0.502892	-0.455825	-0.477459	0.434346	0.385731
YNL163C	-1.21997	-1.17551	-2.64945	-3.15534	-2.5234	-2.75438	0.547137	-0.0798277
YNL174W	-2.52333	-2.59086	-3.78998	-2.41504	-3.17546	-2.65459	1.91801	0.905934
YNL175C	-2.22848	-3.38057	-2.00329	-2.09865	-2.31963	-2.19197	1.33282	1.54245
YNL178W	-0.388188	-0.807566	-0.471741	-0.504319	-0.406478	-0.638794	0.576177	0.725981
YNL180C	1.28739	1.15835	0.641311	0.377379	0.401805	0.357388	-0.366038	-0.821497
YNL181W	-1.63347	-1.87368	-2.07444	-2.63939	-2.13287	-1.90427	1.0397	0.595897
YNL183C	2.71067	2.91925	1.91733	1.63924	1.69771	1.97368	1.94731	1.56421
YNL189W	-0.719317	-1.12278	-1.35533	-1.79225	-1.29635	-1.54839	1.60753	1.37897
YNL190W	2.3635	2.6801	1.24189	1.24031	1.12879	1.42497	0.602391	0.679371
YNL191W	3.7021	4.0841	3.01778	2.8646	3.09495	3.1857	0.529464	0.365182
YNL192W	1.84617	2.35474	1.32083	1.34665	1.2226	1.41639	0.583658	0.829256
YNL193W	2.53103	2.72378	2.26724	2.21459	2.09036	2.23008	-0.245815	-0.781741
YNL194C	2.30666	3.14044	2.01733	2.09078	1.56246	1.89706	-0.12168	-0.0547193
YNL195C	2.0814	2.23838	1.28278	1.09583	0.962263	1.06943	-0.00811465	-0.162986
YNL196C	1.24307	0.910094	1.61816	1.17751	1.50213	1.35297	-0.291638	-0.683049
YNL197C	2.08115	1.79595	1.63344	1.5178	1.46048	1.44357	0.814396	0.468152
YNL198C,YNL199C	1.5774	1.65762	1.74922	1.50171	1.52537	1.53064	0.608648	0.766126
YNL200C	0.838845	1.08999	0.628952	0.500114	0.491243	0.626118	-0.502978	-1.01501
YNL202W	2.49963	2.80997	2.15832	2.21561	2.27466	2.41703	0.628337	0.65304
YNL209W	-0.818833	-1.29647	-1.19527	-1.44245	-1.26782	-1.47342	1.77154	1.64768
YNL219C	-1.3014	-1.38723	-1.78528	-1.86204	-1.68282	-1.65639	0.881841	0.254406
YNL222W	-1.49778	-1.53546	-2.28236	-2.61142	-2.60842	-2.28238	1.4799	0.639613
YNL225C	-0.715704	-1.05699	-0.187513	-0.176502	-0.0255809	-0.180719	2.55454	1.62101
YNL236W	-1.50173	-1.82781	-1.823	-2.78814	-2.05305	-2.54327	0.976058	0.458163
YNL240C	2.06111	2.071	1.63824	1.62532	1.53185	1.56526	0.525323	0.220213
YNL241C	1.33358	1.47012	0.945747	1.02883	0.915025	1.04707	0.228058	0.0946828
YNL244C	1.13949	1.62836	0.658489	0.628678	0.658157	0.795759	0.140437	0.105112
YNL246W	-0.800664	-1.17629	-0.646281	-0.894812	-0.600193	-0.935919	0.798758	0.471379
YNL247W	-2.30643	-2.42876	-2.73381	-3.70841	-3.27806	-3.32514	1.60988	0.317598
YNL248C	-1.69516	-2.04125	-2.36971	-2.73849	-2.05928	-2.25097	0.63098	0.128838
YNL250W	-1.61826	-1.6894	-2.43822	-2.29979	-2.20988	-2.34004	1.15672	0.486438
YNL255C	-1.00334	-1.33067	-1.79642	-1.98232	-1.84567	-1.85402	0.920775	0.684745
YNL259C	-0.472234	-0.481067	-0.619366	-1.4242	-0.780797	-0.752572	0.131637	0.083841
YNL260C	-0.56571	-0.461425	-0.183888	-0.278769	-0.230862	0.16665	0.406753	0.225737
YNL261W	-0.300438	-0.172681	-1.36498	-1.88337	-1.41789	-1.97777	-1.19086	-1.00935
YNL262W	-0.364455	-0.252709	-1.23363	-1.51313	-1.39158	-1.66921	0.663951	0.313118
YNL263C	-0.50773	-0.287154	-1.1278	-1.48412	-1.17358	-0.966013	1.07304	0.738166
YNL265C	-0.153692	-0.142933	0.0572039	-0.391454	0.0120998	-0.392508	0.99141	0.713705
YNL267W	-0.484433	-0.416631	-0.746666	-1.03776	-0.717105	-0.812304	1.29656	0.889947
YNL268W	0.260845	0.344389	-0.113369	-0.251782	-0.0948271	-0.257959	1.65252	1.48922
YNL269W	2.59172	2.19441	1.0004	0.526637	0.589232	0.00722585	-1.00167	-0.428864
YNL270C	2.1593	2.35772	1.018	0.540807	0.716025	0.712208	0.701906	0.298538
YNL272C	-0.321288	-0.741576	-0.0384165	-0.301075	0.163113	-0.285856	1.74968	1.39686
YNL276C	3.70325	3.78295	2.67121	2.93451	2.59471	2.87831	0.0386043	-0.173375
YNL277W	3.5662	4.14612	2.80704	2.75727	2.43787	2.52609	0.0720478	-0.079879
YNL284C	1.46437	1.49542	0.95552	0.771699	0.97253	1.00561	0.380004	-0.210048
YNL284C-B	1.05746	0.821019	0.0724264	0.177127	0.184357	-0.10118	-0.408153	-1.12581
YNL285W	1.77641	1.84824	1.30016	1.6513	1.50089	1.92542	0.29211	0.00186199
YNL286W	0.939315	1.00059	1.00609	0.991768	0.978303	0.881777	0.0483032	-0.381911
YNL289W	-1.26959	-1.46987	-2.53563	-2.73838	-1.20685	-2.70946	0.660244	0.130093
[truncated: 462 more rows]
