# Supplementary material for: Independent manipulation of histone H3 modifications in individual nucleosomes reveals the contributions of sister histones to transcription
Source: eLife. 2017 Oct 13;6:e30178. doi: 10.7554/eLife.30178 (PMC5677365; doi:10.7554/eLife.30178)
Supplement: Figure 8—source data 3. [file elife-30178-fig8-data3.xlsx]

## Sheet: H3DK4R_H3H1
Midi,j and GSSi,j of H3DK4R/H3H are listed in sheet 'H3DK4R_H3H', and those of H3DK4R/H3H are listed in sheet 'H3D_H3HK4R'
genes	MID	GSS
YAL004W	1	0.218238
YAL005C	1	0.111179
YAL010C	1.4162	none
YAL017W	1	-0.300029
YAL018C	1	-0.544229
YAL019W	1	1.54113
YAL021C	1	1.22475
YAL025C	1.24456	none
YAL028W	1	0.680968
YAL031C	1.57388	none
YAL033W	1.27358	none
YAL034C	1	0.848784
YAL034W-A	1.02571	none
YAL035W	1.44352	none
YAL036C	1.11058	none
YAL039C	1	1.04388
YAL041W	1.4717	none
YAL043C	1	2.48354
YAL051W	1	2.26735
YAL053W	5.05629	none
YAL054C	1	2.35529
YAL055W	1	2.35134
YAL056W	1	-1.11127
YAL059W	1	2.30515
YAL060W	1	0.389537
YAL061W	1	5.59906
YAL062W	1	1.90822
YAL067C	3.90902	none
YAR007C	1.61795	none
YAR009C	1	1.18421
YAR015W	1.3723	none
YAR023C	1	1.82382
YAR028W	1	2.38498
YAR035W	1.935	none
YAR053W	3.21787	none
YBL001C	1	-0.067031
YBL004W	1.8473	none
YBL006C	1	0.81639
YBL012C	1	0.33401
YBL013W	1	0.569924
YBL015W	1	1.75526
YBL021C	1	-0.657583
YBL022C	1.70881	none
YBL023C	1.20517	none
YBL024W	1	8.17556
YBL025W	1	8.427
YBL027W	1	2.34173
YBL029C-A	1	0.0854747
YBL032W	1	-3.12268
YBL033C	1	-0.0521383
YBL038W	1	-0.54464
YBL039C	1	11.341
YBL041W	1	-2.49287
YBL043W	1	-1.05994
YBL045C	1	0.145561
YBL048W	1	0.141998
YBL049W	1	0.221579
YBL050W	1	1.60152
YBL054W	1	2.00683
YBL058W	1	-1.10157
YBL064C	1	0.0545165
YBL066C	1	0.53681
YBL067C	1	1.01945
YBL071C	1	1.39096
YBL071W-A	1	0.819943
YBL072C	1.22974	none
YBL075C	1	2.28799
YBL076C	1	1.35256
YBL078C	1	-0.255476
YBL086C	1	2.39475
YBL087C	1	3.13899
YBL092W	2.17158	none
YBL093C	1	-1.36756
YBL104C	1.68213	none
YBL111C,YBL112C,YBL113C	1.03504	none
YBR002C	1	0.576569
YBR003W	1	-1.16686
YBR006W	1	2.79639
YBR010W	1	0.291475
YBR011C	1	1.45409
YBR015C	1	3.90234
YBR016W	1	0.124714
YBR017C	1.39741	none
YBR023C	1.58452	none
YBR026C	1.94319	none
YBR029C	1.00774	none
YBR031W	2.88642	none
YBR034C	1.29733	none
YBR036C	1	-2.31632
YBR037C	1	0.806614
YBR039W	1	-0.151377
YBR041W	1.362	none
YBR043C	1	1.74629
YBR046C	1.87166	none
YBR048W	1.2401	none
YBR049C	1	2.13322
YBR050C	3.45744	none
YBR052C	1	0.89602
YBR054W	1.3283	none
YBR056W-A	1	1.75837
YBR058C	1.55614	none
YBR063C	1	-0.687058
YBR064W	1	-0.226409
YBR065C	1	2.16778
YBR066C	1	2.90169
YBR068C	1	1.5943
YBR069C	1	2.28794
YBR070C	1	1.32863
YBR071W	1	-0.409181
YBR072W	1	4.92845
YBR076C-A	1	0.276056
YBR077C	1	1.69448
YBR078W	1	2.08247
YBR079C	1	3.02125
YBR080C	1	2.08372
YBR082C	1	0.730578
YBR084C-A	1	2.93498
YBR084W	1.42846	none
YBR089C-A,YBR090C	1	-0.292616
YBR101C	1	1.18413
YBR102C	1.31177	none
YBR105C	1	1.17805
YBR106W	2.55748	none
YBR111C	1	2.08486
YBR114W	1	1.64243
YBR116C,YBR117C	1	4.28086
YBR120C	1	0.62065
YBR121C	1.30684	none
YBR124W	1	1.70492
YBR126C	1	1.36165
YBR126W-A,YBR126W-B	1	0.580026
YBR130C	1	3.79708
YBR131W	1	1.0955
YBR132C	1.30713	none
YBR135W	1.87746	none
YBR142W	1.17353	none
YBR143C	1.05654	none
YBR147W	1	1.11533
YBR151W	1	0.648402
YBR154C	1	12.9648
YBR155W	1.03427	none
YBR156C	2.24891	none
YBR162C	1.70406	none
YBR164C	1.98139	none
YBR165W	1	-0.726118
YBR169C	1	0.853454
YBR171W	1	5.09909
YBR173C	1.29138	none
YBR177C	1	0.895155
YBR181C	1	3.65783
YBR182C	1.25431	none
YBR183W	1.62878	none
YBR187W	1.83154	none
YBR189W	1.2635	none
YBR190W,YBR191W	1.00848	none
YBR199W	1	-1.29569
YBR201C-A	1	-2.19386
YBR208C	2.43025	none
YBR210W	1	-1.27194
YBR214W	1	0.612118
YBR217W	1.33318	none
YBR222C	1	-1.77885
YBR229C	2.69868	none
YBR230C	1	0.741846
YBR231C	1.27605	none
YBR233W	2.38906	none
YBR238C	1.62051	none
YBR242W	1	2.54563
YBR243C	1.07485	none
YBR244W	1.21644	none
YBR245C	1	3.87778
YBR246W	1.37514	none
YBR247C	1.1932	none
YBR248C	1	5.32358
YBR249C	1.56042	none
YBR250W	1	2.86313
YBR251W	1	4.00393
YBR253W	1.6806	none
YBR254C	1.87365	none
YBR255C-A	2.42138	none
YBR255W	1	2.05485
YBR257W	1.29973	none
YBR259W	2.52023	none
YBR260C	1.16492	none
YBR263W	2.55494	none
YBR265W	1	3.36659
YBR266C	1	3.60576
YBR269C	1	-1.29506
YBR275C	1.10574	none
YBR280C	1.22177	none
YBR281C	2.10782	none
YBR285W	1	1.79078
YBR287W	1.13133	none
YBR289W	1.27304	none
YBR290W	1	-2.84055
YBR291C	2.64565	none
YBR295W	1	2.42459
YBR296C	1.17401	none
YCL001W-B	1.00676	none
YCL002C	1	0.838476
YCL011C	1	-1.35648
YCL017C	1	-2.82666
YCL025C	1	-4.83006
YCL026C-A	1	-0.474255
YCL034W	1	-0.477418
YCL035C	1	-0.127625
YCL040W,YCL042W	1	0.44779
YCL041C,YCL043C	1	-2.2193
YCL045C	1	5.22761
YCL046W	2.0541	none
YCL048W-A	1	-1.6285
YCL050C	1	4.73241
YCL052C	1	-0.304259
YCL054W	1.17068	none
YCL057C-A	1	1.24537
YCL059C	1.40217	none
YCL064C	1.20841	none
YCR004C	1	1.73917
YCR005C	1.08969	none
YCR006C	1	2.24619
YCR008W	1	0.910963
YCR009C	1	-1.03941
YCR010C	1	2.09784
YCR012W	1	-2.71474
YCR013C	1	-0.502705
YCR016W	1.71015	none
YCR020C-A	4.4984	none
YCR021C	1	1.36465
YCR023C	1	3.10457
YCR024C-A	1	-4.2749
YCR024C-B	1.48354	none
YCR028C-A	1.07423	none
YCR034W	1.67407	none
YCR035C	1	3.05395
YCR037C	1.55989	none
YCR043C	1.43837	none
YCR045C	1	1.90582
YCR047W-A	1.15447	none
YCR052W	1	4.71641
YCR053W	1	11.6489
YCR060W	1	2.6133
YCR068W	1	1.54822
YCR073W-A	1	0.885442
YCR077C	1.03319	none
YCR081W	1.6275	none
YCR082W	1	-1.86847
YCR083W	1	0.559252
YCR086W	1	0.358789
YCR090C	1.74049	none
YCR091W	1	2.73215
YCR093W	1.77349	none
YCR094W	1.11836	none
YCR095C	4.7621	none
YCR107W	1	0.366825
YDL001W	1	0.741366
YDL002C	1	3.6207
YDL004W	1	1.08909
YDL005C	1	0.538151
YDL007W	2.01942	none
YDL012C	1	2.64042
YDL014W	1	0.833703
YDL019C	1.59902	none
YDL020C	1	-0.758006
YDL022C-A,YDL024C	1	2.61609
YDL022W	1	1.28
YDL023C	1	0.877843
YDL025C	1	2.15989
YDL025W-A	1	0.585429
YDL026W	1	4.81002
YDL031W	1	0.972821
YDL032W	1	1.6584
YDL040C	1	6.90621
YDL042C	1	-0.296986
YDL043C	1	2.18141
YDL044C	1.77058	none
YDL045C	1	1.30218
YDL046W	1	0.212924
YDL047W	1	2.10562
YDL050C	1.71003	none
YDL055C	4.00187	none
YDL062W	1	0.788694
YDL067C	1	-0.328966
YDL068W	1	1.81457
YDL070W	1	1.59739
YDL071C	1	1.42812
YDL073W	2.27141	none
YDL075W	1.01123	none
YDL076C	1	0.727105
YDL079C	1	1.58762
YDL081C	3.42623	none
YDL082W	1.65021	none
YDL083C	1	2.17442
YDL085C-A	1.44335	none
YDL085W	1	0.306351
YDL097C	2.58839	none
YDL099W	2.09331	none
YDL100C	2.36321	none
YDL102W	2.44879	none
YDL103C	2.58085	none
YDL106C	1.6961	none
YDL110C	1.37139	none
YDL112W	1.95914	none
YDL113C	1	0.681422
YDL116W	1	3.87637
YDL117W	2.09777	none
YDL121C	1	7.52664
YDL123W	1	1.34006
YDL124W	1	0.909353
YDL125C	1	0.222364
YDL126C	1.64702	none
YDL127W	3.46752	none
YDL128W	1	-1.64355
YDL129W	1	2.81718
YDL130W-A	1	0.090144
YDL131W	1	2.35879
YDL132W	1.86631	none
YDL133W	1	0.758318
YDL137W	1	0.246016
YDL138W	1	0.487507
YDL143W	1.44854	none
YDL144C	1.1767	none
YDL145C	1.16061	none
YDL146W	1.29669	none
YDL148C	1.59638	none
YDL150W	1.32192	none
YDL153C	1.42598	none
YDL155W	1.5648	none
YDL156W	1	1.93866
YDL157C	1	4.19629
YDL159W	1	0.550719
YDL161W	1	3.29373
YDL163W	1.26408	none
YDL166C	1	0.883224
YDL168W	2.16675	none
YDL169C	1	0.588089
YDL170W	1	0.283769
YDL173W	1.18379	none
YDL174C	1	2.63071
YDL180W	1	2.1026
YDL181W	1	2.7522
YDL182W	1	1.2235
YDL183C	1	0.518997
YDL186W	2.56061	none
YDL192W	1	3.07817
YDL197C	1	1.68522
YDL201W	1.12536	none
YDL206W	1	1.0351
YDL208W	1.82443	none
YDL214C	1	2.23226
YDL218W	1	0.993751
YDL221W	1	-1.8029
YDL222C	1	0.78302
YDL223C	1	-1.43527
YDL225W	1.19338	none
YDL226C	1.0945	none
YDL228C	1.30413	none
YDL229W	1.02465	none
YDL230W	1	0.747854
YDL231C	1	-1.66971
YDL243C	1.16826	none
YDR001C	1	0.360891
YDR002W	1	0.340887
YDR003W	1	1.85034
YDR003W-A	1	5.10327
YDR006C	1	-0.723314
YDR007W	1	1.34848
YDR008C	1	1.92333
YDR009W	1	1.23444
YDR011W	1.28172	none
YDR012W	1	2.78461
YDR017C	1	3.60935
YDR018C	1	0.630104
YDR019C	1	1.75032
YDR023W	1.24076	none
YDR025W	1	2.61907
YDR026C	1	2.74762
YDR029W	1	0.250013
YDR031W	1	1.65279
YDR034C	1	3.24961
YDR034C-A	1	-0.395773
YDR034W-B	1	-0.258458
YDR035W	1	1.89573
YDR036C	1	1.49659
YDR037W	1.14766	none
YDR040C	1	1.2691
YDR041W	1	1.17669
YDR042C	1	1.08542
YDR043C	1	0.923318
YDR046C	1.00484	none
YDR049W	1	1.68289
YDR054C	1	1.97897
YDR055W	1.20451	none
YDR059C	1	2.646
YDR060W	1.25826	none
YDR062W	1	3.52648
YDR064W	1	2.23579
YDR065W	2.2277	none
YDR069C	1	4.59679
YDR070C	1	1.27611
YDR071C	1	-0.519735
YDR072C	1	-0.813088
YDR073W	1	2.90518
YDR074W	1	1.6071
YDR078C	1	2.38842
YDR079W	1	2.11768
YDR087C	1	0.799128
YDR088C	1	1.59641
YDR089W	1	0.124613
YDR090C	2.98624	none
YDR091C	1	3.33049
YDR096W	1	2.77959
YDR099W	1	-0.600352
YDR104C	1	1.24534
YDR111C	1	-0.697982
YDR115W	1	-0.670491
YDR117C	1.13655	none
YDR119W-A	1	-0.720459
YDR121W	1.24197	none
YDR125C	1	0.468182
YDR127W	1.18991	none
YDR129C	1.08532	none
YDR133C	1	-0.733021
YDR139C	2.36064	none
YDR147W	1.24999	none
YDR148C	1	-0.214579
YDR149C	1.93264	none
YDR150W	1	-2.73591
YDR151C	1	1.37337
YDR152W	1	-0.0136951
YDR153C	1	1.60293
YDR154C,YDR155C	1	0.647122
YDR156W,YDR157W	1	2.03617
YDR161W	1.62361	none
YDR162C	8.78377	none
YDR164C	1	6.9296
YDR165W	1.60711	none
YDR171W	1	0.194028
YDR173C	1	-0.968613
YDR174W	1.38373	none
YDR178W	1	0.157957
YDR181C	1.26167	none
YDR182W	1.25687	none
YDR185C	1	2.03983
YDR186C	1	0.144415
YDR189W	1.49143	none
YDR190C	1.1141	none
YDR191W	1.56201	none
YDR193W	1.91731	none
YDR197W	1	2.83261
YDR202C	1	-0.101012
YDR203W	1	-1.26411
YDR207C	2.15261	none
YDR208W	1	0.304868
YDR209C	1	7.78415
YDR210C-D	1	1.3123
YDR212W	1.17497	none
YDR213W	1	0.297733
YDR214W	1	3.76243
YDR216W	1	4.65267
YDR218C	1	-3.8421
YDR219C	1	0.968106
YDR221W	1.21213	none
YDR222W	1.99238	none
YDR226W	1	2.65797
YDR230W	1	0.980023
YDR231C	1	0.799137
YDR232W	1	-0.262545
YDR239C	1.00449	none
YDR244W	1	0.481729
YDR245W	1	0.554902
YDR246W	1	1.85205
YDR247W	1	4.22006
YDR249C	1	0.0566389
YDR251W	1	-0.293216
YDR253C	1	-0.224168
YDR255C	1	1.72008
YDR256C	1	0.412176
YDR258C	1	0.928302
YDR261C-D	1	-4.59588
YDR262W	1	0.703384
YDR267C	1.08859	none
YDR272W	1	0.782435
YDR273W	1	1.73916
YDR275W	1	3.56092
YDR276C	1	0.137161
YDR277C	1	1.96489
YDR284C	1.36648	none
YDR285W	1.23535	none
YDR291W	1.28296	none
YDR292C	1.32708	none
YDR294C	1.45358	none
YDR295C	1.63454	none
YDR297W	2.98889	none
YDR299W	1	3.40346
YDR300C	1.436	none
YDR301W	1.41835	none
YDR303C	1.34032	none
YDR305C	1.69666	none
YDR312W	1	2.6754
YDR313C	1	0.701102
YDR322C-A	1	1.84501
YDR323C	1.25978	none
YDR325W	1.18058	none
YDR326C	1.0867	none
YDR329C	1	-0.879275
YDR334W	1	7.651
YDR341C	1.14679	none
YDR342C	1	1.28295
YDR344C	1.12507	none
YDR349C	1	-1.15959
YDR354W	1	3.55158
YDR357C	1	-4.70928
YDR358W	1	1.09745
YDR361C	1	0.230246
YDR363W-A	1.1931	none
YDR365C	1	2.2222
YDR371W	1.43838	none
YDR372C	1.82783	none
YDR374C	1	-0.578629
YDR377W	1	1.91442
YDR379C-A	1	-2.63754
YDR380W	1.13742	none
YDR384C	1	1.10102
YDR385W	1	8.46599
YDR394W	3.004	none
YDR395W	1	3.58342
YDR397C	1	2.17495
YDR398W	1	3.95369
YDR403W	1	-4.29567
YDR405W	1	1.44425
YDR407C	1.66082	none
YDR408C	1.15725	none
YDR411C	1.74637	none
YDR413C	1	2.31153
YDR417C	1.18575	none
YDR418W	1	2.18825
YDR419W	1	1.11069
YDR420W	1.65704	none
YDR423C	1	2.4412
YDR427W	1.62731	none
YDR428C	1	0.986379
YDR429C	1	4.18877
YDR432W,YDR433W	1	-1.21274
YDR434W	2.63052	none
YDR435C	1	-0.0231964
YDR437W	1.01833	none
YDR440W	1	3.35664
YDR447C	1.17809	none
YDR448W	1	0.980893
YDR449C	1.32575	none
YDR458C	1	-0.457046
YDR460W	1	-2.35386
YDR461C-A	1	0.483763
YDR461W	1	0.715129
YDR463W	1	0.531675
YDR465C	1	5.75913
YDR466W	1.14025	none
YDR467C	1.02203	none
YDR469W	2.26443	none
YDR471W	1	0.686831
YDR475C	1.1471	none
YDR476C	1	1.68058
YDR480W	1	2.28122
YDR481C	1	0.0121232
YDR482C	1	1.30595
YDR484W	1	1.72795
YDR490C	1	-0.105712
YDR491C	1	3.01279
YDR492W	1	1.55609
YDR494W	1.13046	none
YDR496C	1.03465	none
YDR497C	1.95976	none
YDR498C	1.4815	none
YDR499W	1.77392	none
YDR501W	1	0.0558727
YDR505C	1	-0.20156
YDR508C	1	0.490969
YDR509W	1	1.08026
YDR510W	1	2.41426
YDR511W	1	0.835216
YDR512C	1	0.327768
YDR513W	1	0.379749
YDR516C	1	0.746447
YDR517W	1	1.77728
YDR519W	1.08761	none
YDR524C-B	1	-0.460778
YDR525W-A	1	0.509083
YDR527W	1	2.00266
YDR528W	1.4329	none
YDR529C	1	0.293623
YDR530C	1	0.922933
YDR535C	1.09905	none
YDR536W	1	3.22794
YEL002C	1.80131	none
YEL003W	2.89654	none
YEL006W	1	-0.758878
YEL009C	1	-2.60169
YEL011W	1	2.21096
YEL012W	1	0.69547
YEL013W	1.74367	none
YEL015W	1.29005	none
YEL019C	1	1.59257
YEL022W	1	1.60586
YEL023C	3.57294	none
YEL024W	1	0.982235
YEL026W	1	6.93912
YEL031W	2.65312	none
YEL033W	1	-1.99873
YEL034C-A	1	-1.46497
YEL034W	1	-0.582061
YEL036C	1	-2.11635
YEL038W	1	0.758502
YEL039C	1	0.813116
YEL040W	1.36377	none
YEL042W	1.2187	none
YEL043W	1.5287	none
YEL044W	1	0.62438
YEL047C	2.67253	none
YEL053W-A	1.45346	none
YEL054C	1.08679	none
YEL058W	1	0.000447182
YEL059C-A	2.41254	none
YEL060C	1	-0.598694
YEL068C	2.44616	none
YEL070W	1	-0.56877
YEL071W	1	1.21681
YEL073C	1	2.23667
YER001W	1.1644	none
YER002W	3.42856	none
YER003C	1.80564	none
YER005W	1	1.96071
YER006W	1.11049	none
YER007C-A	2.49733	none
YER009W	1	1.68698
YER012W	2.80164	none
YER014W	1.25269	none
YER017C	1	-1.50376
YER019C-A	1	-0.160708
YER020W	1.05231	none
YER021W	7.04089	none
YER022W	1	3.58186
YER023C-A	1.6406	none
YER023W	1.0413	none
YER024W	1.41559	none
YER027C	1	3.90889
YER028C	1	2.83258
YER032W	2.24434	none
YER034W	1	-0.109324
YER035W	1	0.818562
YER036C	1	-0.0772334
YER037W	1	-1.68194
YER043C	1	4.52292
YER044C-A	3.84482	none
YER048W-A	1	0.654152
YER050C	1	-0.696671
YER053C-A	1	1.25621
YER054C	1	1.75268
YER055C	1	1.69448
YER056C	1	1.86829
YER058W	1.31898	none
YER061C	1.16645	none
YER062C	1	1.84454
YER063W	1.15373	none
YER064C	1	1.98989
YER065C	1.20932	none
YER066C-A	1	1.71789
YER067C-A	1	0.665779
YER067W	1	0.482626
YER068C-A	1	-3.00404
YER068W	1	-0.0376529
YER072W	1	4.59509
YER073W	1	8.12924
YER074W	1.21918	none
YER074W-A	1	-0.132076
YER079W	1	1.47764
YER082C	1.19406	none
YER084W	1	0.447066
YER086W	1.2307	none
YER088C	1	2.84615
YER088C-A,YER089C	2.08835	none
YER090W	1.20987	none
YER091C	2.08826	none
YER092W	1	1.77798
YER093C	1	-2.05108
YER095W	1	0.242808
YER096W	1	1.67256
YER097W,YER098W	1	0.215093
YER103W	1	2.58602
YER104W	1.44804	none
YER106W	1.22972	none
YER107W-A	2.00187	none
YER110C	1.25851	none
YER111C	1.99467	none
YER116C	1	2.11931
YER117W	1.5655	none
YER123W	1.60556	none
YER125W	1	-2.19828
YER126C	1	4.61921
YER127W	1.07428	none
YER131W	1.07191	none
YER133W	1	0.882052
YER135C	1	-1.44877
YER141W	1	2.12322
YER145C	1	-1.04049
YER146W	1	1.46843
YER147C	1	0.700293
YER147C-A	1	2.19483
YER148W	1	1.21926
YER149C	1	3.04046
YER150W	1	0.933256
YER156C	1	-0.415404
YER157W	1	2.44366
YER158W-A	1	0.26391
YER159C	1	0.851286
YER162C	1	1.04842
YER164W	1	2.33616
YER165W	1.57369	none
YER167W	1	0.228438
YER169W	1	0.952886
YER171W	2.72276	none
YER177W	1	-0.636837
YER178W	1	-1.46574
YER180C	1.08504	none
YER180C-A	1	0.172285
YER182W	1	-0.352393
YER185W	1	1.39663
YER186C	1	10.5723
YFL007W	1.04342	none
YFL008W	3.21603	none
YFL010W-A	1.49999	none
YFL011W	1	0.561678
YFL013W-A	1	0.903424
YFL015C	1	0.336584
YFL016C	1	1.12888
YFL017C	1	2.20888
YFL017W-A	1	0.932408
YFL018C	1	-0.916075
YFL021C-A	1	2.55143
YFL021W	1	-3.4221
YFL024C	1	4.30019
YFL025C	2.45742	none
YFL027C	1	8.79285
YFL030W	1.31695	none
YFL031W,YFL032W	1	-0.265591
YFL034C-A	1	5.42483
YFL034C-B	1.63878	none
YFL038C	1	-0.325313
YFL045C	1.47555	none
YFL046W	1.19929	none
YFL047W	1.3343	none
YFL052W	1	1.75425
YFL053W	1	3.96151
YFL054C	1	1.85086
YFL067W	2.52713	none
YFR003C	1	-1.05196
YFR004W	2.59502	none
YFR005C	1.5883	none
YFR009W	1.41412	none
YFR012W	2.31161	none
YFR015C	1	2.46077
YFR017C	1	1.41835
YFR023W	1	1.55195
YFR029W	1	2.41636
YFR030W	1	3.04757
YFR031C	1	1.83362
YFR031C-A	1	1.42136
YFR032C-A	1	-3.10754
YFR033C	1	0.195817
YFR034C	1	-0.000842119
YFR037C	1	4.72183
YFR039C	2.00597	none
YFR040W	1	-0.0709167
YFR041C	1.58489	none
YFR044C	1.24144	none
YFR050C	1.71844	none
YFR052C-A,YFR053C	1	1.6651
YFR054C	1	-1.0858
YGL002W	1	-0.0722301
YGL003C	1	0.47544
YGL004C	1	2.04269
YGL010W	1	0.309117
YGL011C	3.15796	none
YGL016W	2.14911	none
YGL018C	1	1.56231
YGL020C	1.5753	none
YGL025C	1	1.54571
YGL026C	1.2486	none
YGL027C	1	2.8837
YGL031C	1	4.23732
YGL035C	1	2.03329
YGL036W	1	1.48474
YGL037C	1	0.310222
YGL040C	1	5.07896
YGL041C	1	1.17345
YGL045W	1.05001	none
YGL050W	1	3.50744
YGL051W,YGL052W	1	1.00968
YGL053W	1	2.11735
YGL054C	1	0.071063
YGL055W	2.55345	none
YGL058W	1	0.207637
YGL062W	1	2.98841
YGL063W	1	-0.899936
YGL065C	1.11096	none
YGL066W	1.47148	none
YGL069C	1	-1.7395
YGL076C	1.1877	none
YGL077C	1.19715	none
YGL078C	1.08471	none
YGL080W	1.12356	none
YGL092W	1.00726	none
YGL093W	1.06493	none
YGL094C	1.35595	none
YGL098W	1	1.40523
YGL105W	1.46678	none
YGL108C	1.76031	none
YGL109W	1.04108	none
YGL112C	1.51381	none
YGL116W	3.55559	none
YGL120C	1	0.537519
YGL121C	1	3.8985
YGL122C	1	-0.528897
YGL123W	1	-1.79138
YGL125W	1	-0.491786
YGL126W	1	5.88856
YGL127C	1	2.52272
YGL128C	1.72874	none
YGL133W	1	2.73641
YGL134W	2.06835	none
YGL137W	1.07969	none
YGL146C	1	2.58584
YGL147C	1.08218	none
YGL148W	1	1.84714
YGL151W	1	3.5967
YGL152C	1.60124	none
YGL155W	1.24462	none
YGL162W	1	2.35935
YGL163C	1	0.598521
YGL165C	1	2.40239
YGL166W	1	1.57742
YGL171W	1.04952	none
YGL173C	1.81943	none
YGL181W	1	0.700388
YGL182C,YGL183C	1.17174	none
YGL184C	1	2.3987
YGL187C	1	1.12714
YGL189C	1	-2.09238
YGL190C	1	-0.508781
YGL191W	1	-0.128717
YGL192W	1	0.370306
YGL193C	1	-1.44282
YGL196W	1.03141	none
YGL197W	1.72854	none
YGL198W	1	-2.80669
YGL203C	1	-0.548345
YGL205W	1	0.226026
YGL207W	1.60839	none
YGL213C	1.16609	none
YGL218W	1	0.176545
YGL219C	1	-0.147998
YGL220W	1	-2.17473
YGL228W	1	-0.624118
YGL229C	1	0.987872
YGL231C	3.71228	none
YGL234W	1.06972	none
YGL238W	1.94359	none
YGL245W	1.17675	none
YGL246C	1.2043	none
YGL248W	1	2.21441
YGL252C	1.25085	none
YGL253W	1.05901	none
YGL255W	1	1.14806
YGL256W	1	1.47541
YGL259W	1	0.113129
YGL262W	1.33185	none
YGR002C	1	-1.70623
YGR008C	1	0.49124
YGR009C	1	0.583483
YGR017W	1.12966	none
YGR018C	1.61272	none
YGR019W	1	1.55895
YGR021W	1	5.77771
YGR023W	1	4.93347
YGR024C	1	0.040106
YGR028W	1	1.29488
YGR029W	1	0.239999
YGR030C	1	-0.259441
YGR031C-A	1	2.28664
YGR031W	1	2.27376
YGR035W-A	1.55035	none
YGR037C	1	-0.702483
YGR043C	1	1.21074
YGR044C	1	1.29262
YGR046W	1	0.667505
YGR048W	1.08081	none
YGR050C	1	2.49032
YGR051C	1	3.5419
YGR053C	1.21483	none
YGR055W	1	2.67726
YGR057C	1	-1.04409
YGR059W	1	0.608557
YGR060W	1.45345	none
YGR061C	1.09122	none
YGR064W	1	0.851357
YGR066C	1	2.62373
YGR067C	1	1.30418
YGR070W	1.39724	none
YGR072W	2.28308	none
YGR075C	1	0.825464
YGR078C	1	7.056
YGR085C	1	2.11719
YGR086C	1	0.125456
YGR088W	1	-0.335248
YGR089W	3.48421	none
YGR090W	2.16741	none
YGR093W	1	0.0869483
YGR094W	1.02047	none
YGR096W	1.17592	none
YGR099W	1.02219	none
YGR101W	1	2.95268
YGR102C	1	0.94724
YGR103W	1.04973	none
YGR109C	1	2.59954
YGR110W	1	2.40519
YGR113W	1.56094	none
YGR116W	1.3247	none
YGR118W	1	1.96126
YGR121C	1	0.762961
YGR122W	1.81915	none
YGR124W	1.8696	none
YGR127W	1	-4.57712
YGR128C	1.52585	none
YGR130C	1	-1.28569
YGR132C	1	0.200403
YGR135W	1.74998	none
YGR141W	1	2.50484
YGR142W	1	0.854931
YGR143W	1	1.32966
YGR145W	1	1.72567
YGR146C	1	0.589122
YGR147C	1	2.23426
YGR151C,YGR152C	1.1669	none
YGR154C	1	1.35321
YGR158C	1.62928	none
YGR161C	1	0.155774
YGR161W-C	1	1.92383
YGR162W	1	5.28415
YGR169C-A	1	4.62291
YGR170W	2.24613	none
YGR172C	5.58144	none
YGR173W	2.49372	none
YGR174C	1	-0.752811
YGR175C	1	1.55249
YGR179C	2.03148	none
YGR180C	5.50554	none
YGR182C	1	1.32124
YGR183C	1	0.538892
YGR185C	1.65664	none
YGR189C	1.54263	none
YGR194C	1.35536	none
YGR197C	1	0.559572
YGR200C	1.22955	none
YGR201C	1	3.72972
YGR202C	1.01605	none
YGR203W	1	0.117343
YGR205W	1.2502	none
YGR208W	1.02765	none
YGR209C	1	0.280517
YGR210C	1	2.90501
YGR211W	1	0.33996
YGR213C	1	1.59011
YGR214W	1	5.0363
YGR217W	1	4.72736
YGR224W	1	-2.39747
YGR227W	1	2.30879
YGR230W	1	-0.530645
YGR236C	1	1.25586
YGR239C	1	1.26233
YGR241C	1	1.68422
YGR242W	1	1.64664
YGR243W	1	0.274605
YGR248W	1	2.48136
YGR249W	1	3.99723
YGR250C	1	1.08348
YGR251W	1	-0.162038
YGR256W	1	-0.265215
YGR265W	1	-0.771739
YGR269W	1	3.10494
YGR270W	1	1.04669
YGR271W	2.55157	none
YGR275W	4.85626	none
YGR277C	1.53612	none
YGR278W	2.02722	none
YGR280C	1.755	none
YGR281W	1.78791	none
YGR282C	1	-3.00369
YGR284C	1	-0.310694
YGR285C	1	3.65622
YGR287C	1	-1.72224
YGR295C	1.74591	none
YHL008C	1	1.72714
YHL010C	1.32267	none
YHL011C	1.0557	none
YHL012W	1.02594	none
YHL013C	1	3.64442
YHL016C	1.12042	none
YHL018W	1.21288	none
YHL021C	1	0.121818
YHL022C	1	-1.47307
YHL025W	1	2.1387
YHL027W	1	0.266794
YHL030W	1.42662	none
YHL033C	1	0.832032
YHL034C	2.18723	none
YHL036W	1	1.36715
YHL038C	4.32889	none
YHL039W	1.46535	none
YHL050C	1.2582	none
YHR001W-A	1	1.17797
YHR002W	1	1.78542
YHR006W	1	0.400822
YHR007C	1.59789	none
YHR009C	1	0.101263
YHR013C	1.91242	none
YHR016C	1	1.38573
YHR017W	1	0.33979
YHR018C	1	0.898625
YHR019C	1.31527	none
YHR022C	1.12524	none
YHR024C	1	4.26805
YHR025W	1	2.50617
YHR029C	1	-0.299212
YHR031C	1	1.15943
YHR032W	1	-1.19934
YHR032W-A	1.38701	none
YHR033W	1	0.60863
YHR039C	2.16549	none
YHR044C	1	0.739736
YHR047C	1	4.69401
YHR048W	1	1.55374
YHR049C-A	1	0.815259
YHR050W	1	-0.246578
YHR051W	1	-0.389372
YHR052W	1	3.52263
YHR058C	1.95509	none
YHR062C	1.73548	none
YHR063C	1.44697	none
YHR064C	1.93859	none
YHR065C	1.57165	none
YHR066W	1	3.62529
YHR068W	1	2.13058
YHR070C-A	1	1.00412
YHR071W	1	1.77594
YHR072W-A	1	0.440658
YHR073W	1.27011	none
YHR076W	1	2.24616
YHR078W	1	-0.551659
YHR079C	1	0.385386
YHR082C	1	0.881501
YHR085W	1.69735	none
YHR087W	1	1.73977
YHR088W	1.33256	none
YHR096C	1	2.5939
YHR097C	1	0.541408
YHR099W	2.04297	none
YHR104W	1	2.59387
YHR105W	1	4.43411
YHR108W	1.42903	none
YHR118C	1	4.24415
YHR119W	1.39287	none
YHR120W	2.23784	none
YHR123W	1.21212	none
YHR127W	1.51098	none
YHR128W	1.17382	none
YHR129C	1	2.96701
YHR136C	1	7.33113
YHR137C-A	1	0.716628
YHR137W	1	0.423591
YHR138C	1	-0.176851
YHR139C	1	2.21285
YHR139C-A	2.19292	none
YHR141C	4.97882	none
YHR146W	1	-0.311673
YHR150W	1	-0.564466
YHR155W	1.32462	none
YHR156C	3.43438	none
YHR158C	1	1.64701
YHR160C	1	0.203448
YHR161C	1	1.31349
YHR162W	1	0.456397
YHR164C	1	1.95541
YHR165C	2.04233	none
YHR169W	1	0.383376
YHR170W	1	3.92436
YHR178W	2.6923	none
YHR180W	1	2.11613
YHR183W	1	1.50112
YHR186C	1	2.89011
YHR187W	1.14567	none
YHR190W	2.36111	none
YHR192W	1	4.04148
YHR199C	1	2.38532
YHR203C	1	2.30896
YHR206W	1	1.86266
YHR208W	1.40704	none
YHR216W	1	-0.979549
YIL002W-A	1	-0.955855
YIL004C	1	0.892318
YIL014C-A	1.91037	none
YIL019W	1	1.98313
YIL021C-A	1	0.366681
YIL021W	1	0.988185
YIL023C	1	0.282472
YIL024C	1.76268	none
YIL027C	2.03495	none
YIL030C	1.78339	none
YIL030W-A,YIL031W	1	-0.397005
YIL033C	1	0.246356
YIL035C	1.12894	none
YIL045W	1	2.78916
YIL046W	1	0.969486
YIL047C,YIL047C-A	1	-0.157241
YIL050W	1	-0.631383
YIL052C	3.2882	none
YIL053W	3.10274	none
YIL055C	1	0.771569
YIL056W	1.16298	none
YIL057C	1	-0.88751
YIL059C	1	1.71373
YIL065C	1	2.4522
YIL066W-A	1.49216	none
YIL068C	1.5052	none
YIL069C	1.06148	none
YIL075C	4.32106	none
YIL077C	1	1.86956
YIL078W	1.25185	none
YIL079C	1	2.25588
YIL086C	1	0.0648392
YIL087C	1	1.80327
YIL090W	1	2.64196
YIL091C	2.18479	none
YIL093C	1	9.25374
YIL094C	1.93081	none
YIL096C	1.28403	none
YIL099W	1	1.56355
YIL101C	1	0.504067
YIL104C	1.87744	none
YIL105C	1	1.4825
YIL106W	1	0.780559
YIL111W	1	1.88492
YIL113W	1	1.61627
YIL115C	1.96424	none
YIL117C	1.78667	none
YIL118W	1	0.441773
YIL119C	1	-1.74151
YIL122W	1	2.50185
YIL123W	1	0.0185297
YIL125W	1	-1.22584
YIL126W	1	0.601652
YIL128W	2.38446	none
YIL133C	1	0.682966
YIL135C	1	1.10456
YIL136W	1	0.795822
YIL138C	1.11114	none
YIL142W	1.11308	none
YIL143C	1	-0.157173
YIL144W	1	0.226421
YIL150C	1	3.23389
YIL152W	1.11716	none
YIL153W	1	2.98326
YIL155C	1.42133	none
YIL160C	1	0.31642
YIL162W	1	1.28892
YIL164C	1	-2.50822
YIL169C	1.82737	none
YIR008C	1.31937	none
YIR012W	2.10548	none
YIR016W	1	1.26954
YIR017W-A	1	3.00794
YIR018W	1	2.61073
YIR022W	1	2.51802
YIR024C	4.06502	none
YIR026C	1.04431	none
YIR037W	2.73778	none
YIR039C	1	-0.133732
YJL001W	1.49914	none
YJL004C	1	-0.0397382
YJL010C	1.22983	none
YJL013C	1	5.44292
YJL014W	1.11636	none
YJL019W	1	4.0147
YJL020C	1	0.864252
YJL033W	1	-0.486891
YJL034W	1	0.865566
YJL035C	1	0.959737
YJL036W	1	-0.982582
YJL037W	1	0.225752
YJL038C	1	-0.583978
YJL039C	1.04194	none
YJL041W	1.44075	none
YJL042W	1	2.93211
YJL050W	1	4.25855
YJL052W	1	6.32775
YJL055W	1	1.82385
YJL056C	1	-0.0480028
YJL060W	1	-0.337676
YJL062W-A	1	-0.593765
YJL066C	1	1.01061
YJL068C	1	1.72104
YJL069C	1.38312	none
YJL074C	1	-0.38909
YJL077C	1	0.811781
YJL080C	1.23974	none
YJL081C	1	1.93981
YJL085W	1	3.26502
YJL089W	1	0.737989
YJL095W	1	2.89727
YJL098W	2.52224	none
YJL100W	1	-2.31743
YJL102W	1	0.0691258
YJL103C	1	2.16464
YJL106W	1	-2.31409
YJL107C,YJL108C	1	1.45073
YJL115W	2.04853	none
YJL116C	1	3.92725
YJL122W	1.77377	none
YJL123C	1.62638	none
YJL125C	1.7456	none
YJL129C	1	6.608
YJL133C-A	1	0.442974
YJL134W,YJL135W	1	2.74292
YJL137C	1	-0.373839
YJL138C	1	-0.0226108
YJL141C,YJL142C	1	0.345712
YJL144W	1	0.789145
YJL148W	1	3.51582
YJL151C	1	-1.8578
YJL155C	1	1.25222
YJL159W	1.56204	none
YJL163C	1	4.0433
YJL164C	1	1.84042
YJL166W	1	0.409468
YJL167W	1.87927	none
YJL170C	1	0.240411
YJL172W	1.00421	none
YJL177W	1.81934	none
YJL180C	3.13254	none
YJL190C	1.42625	none
YJL191W	1	0.783306
YJL196C	1	0.291759
YJL199C	1	2.94433
YJL200C	2.23845	none
YJL202C	1	4.31275
YJL203W	1.34214	none
YJL205C	1	0.144829
YJL207C	1.37131	none
YJL210W	1	2.79151
YJL212C	1	5.06844
YJL218W	2.08617	none
YJR008W	1	0.705837
YJR010W	1	0.0775268
YJR014W	1.84026	none
YJR016C	1.0447	none
YJR027W	1	-0.0972569
YJR029W	1	-0.0985695
YJR032W	1.79182	none
YJR038C	1	3.6817
YJR039W	1	-2.47539
YJR040W	1	1.92459
YJR042W	1.90832	none
YJR045C	1	-0.410728
YJR046W	1	0.724936
YJR052W	1	-1.4355
YJR053W	1	2.46421
YJR056C	1	-9.56052
YJR058C	1	0.420578
YJR059W	1	1.16378
YJR060W	1	2.00491
YJR061W	4.20729	none
YJR067C	2.27837	none
YJR069C	1.47618	none
YJR070C	1.24318	none
YJR072C	1.09601	none
YJR073C	1	1.60211
YJR074W	1	2.69159
YJR077C	1	1.35738
YJR078W,YJR079W	1.18993	none
YJR082C	1	0.679269
YJR084W	2.02066	none
YJR085C	1	-0.473706
YJR086W,YJR087W	1	-3.25064
YJR091C	1	0.721744
YJR096W	1	0.997661
YJR097W	1	-1.9199
YJR099W	1	5.51616
YJR100C	1	-1.94683
YJR104C	1	0.907092
YJR105W	1	0.149326
YJR110W	1	1.93152
YJR111C	1	0.328537
YJR113C	1	1.26014
YJR114W	1	2.91626
YJR115W	1	1.42805
YJR116W	1	0.00775055
YJR118C	1.42909	none
YJR119C	1	-1.05578
YJR121W	1	1.26736
YJR123W	1.21427	none
YJR127C	1	-0.148736
YJR134C	1.47419	none
YJR140C	1	2.96881
YJR143C	1.38372	none
YJR145C	1	4.36343
YJR146W,YJR147W	2.6056	none
YJR152W	1.53524	none
YJR155W	1	1.08447
YKL002W	1	0.528913
YKL003C	1	1.08205
YKL004W	1	-0.203287
YKL005C	1	0.686466
YKL006W	1.1574	none
YKL009W	2.82012	none
YKL014C	1.04684	none
YKL015W	1	0.831243
YKL016C	1	-3.18764
YKL021C	1	-0.932967
YKL023W	1	1.83983
YKL026C	1	1.04673
YKL029C	1.00662	none
YKL032C	1	1.62444
YKL034W	1.40474	none
YKL035W	1	2.9162
YKL036C	1	0.453123
YKL038W	1	1.22644
YKL043W	1	-2.85111
YKL044W	1	-1.11849
YKL048C	1	1.28183
YKL049C	1	3.55441
YKL052C	1	0.995069
YKL053C-A	1	-0.288811
YKL053W	1	2.73893
YKL054C	1.62695	none
YKL055C	1	1.09304
YKL056C	4.90059	none
YKL057C	1	9.54993
YKL058W	1	1.74363
YKL059C	1	0.371533
YKL060C	1	-0.676887
YKL061W	1	3.56711
YKL065C	1	-0.677598
YKL065W-A	1	3.338
YKL066W	1	2.48056
YKL067W	1	1.00055
YKL068W	1	-0.00513179
YKL068W-A	1	2.4456
YKL069W	1	0.926285
YKL070W	1	2.49947
YKL074C	1.1306	none
YKL078W	2.20415	none
YKL080W	1.94733	none
YKL082C	1.28532	none
YKL084W	1	2.96426
YKL085W	1	-0.16556
YKL087C	1	-0.740999
YKL090W	1	1.38041
YKL091C	1	1.02609
YKL093W	1	1.96515
YKL094W	1	3.31234
YKL095W	1.10176	none
YKL096W	1	0.536421
YKL096W-A	1	1.4294
YKL102C	1.17641	none
YKL109W	1	1.74878
YKL112W	1	1.59034
YKL113C	1	4.79662
YKL114C	1	0.595367
YKL117W	3.91178	none
YKL122C	1.72784	none
YKL125W	3.70091	none
YKL135C	1.15601	none
YKL141W	1	-1.49619
YKL142W	1	-1.88889
YKL143W	1.38036	none
YKL145W	2.44573	none
YKL146W	1	0.167722
YKL147C	1	0.347876
YKL148C	1	0.578269
YKL150W	1	-4.80401
YKL151C	1	0.648149
YKL152C	1	0.947464
YKL153W	1	0.302367
YKL155C	1	1.7447
YKL156C-A	1	-0.4018
YKL159C	1	0.937608
YKL164C	4.84803	none
YKL171W	1	2.57313
YKL172W	1	3.75785
YKL173W	1.04898	none
YKL175W	1	0.184871
YKL177W	1	-3.37602
YKL182W	1.10597	none
YKL184W	1.81909	none
YKL185W	1.82425	none
YKL186C	1	0.709658
YKL187C	1	0.0150388
YKL190W	1	0.604014
YKL192C	1	1.73833
YKL195W	1	-0.789167
YKL196C	2.30614	none
YKL198C	1	1.3669
YKL201C	1	2.99912
YKL202W	1	3.39051
YKL203C	1.22908	none
YKL210W	1.5997	none
YKL212W	1.35785	none
YKL217W	1	2.95797
YKL218C	1.64957	none
YKL220C	1.27992	none
YKL221W	1	-0.0474054
YKR002W	1	0.906539
YKR007W	1	0.438918
YKR009C	1	1.56279
YKR010C	2.3645	none
YKR014C	1	-0.528074
YKR016W	1	2.99084
YKR019C	1	1.70511
YKR023W	1	2.80872
YKR025W	1.69488	none
YKR026C	1.12567	none
YKR027W	3.69269	none
YKR028W	1	3.99379
YKR034W	1	4.43306
YKR038C	1	-0.653802
YKR039W	8.69805	none
YKR041W	1.70028	none
YKR042W	1	-0.199353
YKR046C	1.5609	none
YKR047W	1	0.406611
YKR049C	1	-0.0387951
YKR052C	1.38223	none
YKR055W	2.05563	none
YKR058W	1	2.05122
YKR059W	1.45298	none
YKR060W	2.8695	none
YKR061W	1	2.18525
YKR063C	1.09151	none
YKR064W	1.68398	none
YKR066C	1	0.486691
YKR069W	1	0.868896
YKR071C	1	1.30244
YKR072C	1	1.50526
YKR075C	1.81895	none
YKR075W-A	2.09282	none
YKR080W	1	2.85867
YKR082W	2.25196	none
YKR085C	1.0958	none
YKR086W	1.95153	none
YKR089C	1	1.20396
YKR091W	1.86935	none
YKR094C	1	0.68077
YKR096W	1	-2.07787
YKR097W	3.43314	none
YKR098C	1	2.1176
YKR100C	1.29944	none
YKR102W	1	0.676951
YLL004W	1.8856	none
YLL005C	1.5594	none
YLL008W	1	-0.190679
YLL009C	1	1.38419
YLL010C	1	0.701058
YLL011W	1	2.52968
YLL014W	1	-0.809854
YLL015W	1.20946	none
YLL018C	1.30045	none
YLL018C-A	1.016	none
YLL019C,YLL020C	1	1.8728
YLL021W	1	0.952914
YLL023C	1	1.81608
YLL024C	1	0.384014
YLL025W	1.29349	none
YLL026W	1	0.10901
YLL027W	1	-0.456478
YLL029W	1	0.838367
YLL030C	1	-2.64852
YLL034C	1.74968	none
YLL036C	1	-0.0253309
YLL039C	1	-0.272917
YLL040C	1.24015	none
YLL041C	1	0.708286
YLL043W	1	0.8999
YLL044W	1.23662	none
YLL045C	1.43963	none
YLL048C	1.89825	none
YLL049W	1	-0.321349
YLL055W	1.03034	none
YLL056C	1	3.12858
YLL058W	1	1.97833
YLR001C	1	1.54727
YLR005W	1	-2.28127
YLR007W	1	-3.27255
YLR011W	1.02722	none
YLR012C	1	-0.621039
YLR019W	1	0.722672
YLR023C	1	1.50144
YLR025W	1.85398	none
YLR029C	1.98152	none
YLR030W	1	1.18838
YLR037C	1.35494	none
YLR038C	1	-0.0103055
YLR039C	1.31323	none
YLR045C	1	2.62263
YLR048W	1	1.62882
YLR051C	1.50515	none
YLR053C	1.88326	none
YLR055C	1	0.0882444
YLR058C	1	1.49505
YLR060W	1.62519	none
YLR066W	1.83573	none
YLR067C	1.72265	none
YLR069C	1.45072	none
YLR075W	1	1.80673
YLR076C	1	0.747421
YLR083C	1	2.62502
YLR086W	1.1605	none
YLR088W	1.07178	none
YLR090W	1	0.210908
YLR092W	1	4.50159
YLR093C	1	1.02563
YLR094C	1	1.75305
YLR101C	2.35237	none
YLR107W	1.3579	none
YLR108C	1.06379	none
YLR109W	1	0.610704
YLR110C	1.02507	none
YLR114C	1.45569	none
YLR120C	1	2.19922
YLR120W-A	1	0.856363
YLR125W	1.99464	none
YLR126C	1	-0.164744
YLR129W	1.37979	none
YLR130C	1.06228	none
YLR142W	1	-0.790245
YLR149C	1	0.714702
YLR150W	1.38926	none
YLR152C	1	2.02758
YLR153C	1.39376	none
YLR154W-E	1	1.05483
YLR154W-F	1	1.3492
YLR162W	1	1.24643
YLR164W	1	3.07816
YLR168C	1	1.54815
YLR175W	1.12694	none
YLR176C	1	1.34575
YLR177W	1	1.40073
YLR178C	1	0.871442
YLR181C	1	3.6427
YLR182W	1	1.818
YLR185W	1	3.83211
YLR189C	1	1.33528
YLR193C	1	2.38636
YLR194C	1	2.06142
YLR195C	1	4.218
YLR196W	1.05219	none
YLR197W	1.05583	none
YLR199C	1.60512	none
YLR200W	1.9555	none
YLR201C,YLR202C,YLR203C	1	-0.0419481
YLR205C	1	4.39553
YLR206W	1	-0.467982
YLR208W	1	2.56442
YLR209C	1.20737	none
YLR211C	1.55311	none
YLR216C	1	0.781885
YLR217W	1	0.833102
YLR219W	1	2.38455
YLR222C	1.08196	none
YLR224W	1	0.909571
YLR225C	1	-1.08074
YLR232W	1	0.00385996
YLR233C	2.0713	none
YLR243W	1.47183	none
YLR245C	1	-0.374123
YLR246W	1	0.291608
YLR248W	1	1.10113
YLR249W	1.4587	none
YLR250W	1	2.11567
YLR251W,YLR252W	1	3.87837
YLR254C	1	-0.765262
YLR256W	1	2.0336
YLR257W	1	-3.61303
YLR258W	1	1.51011
YLR259C	1	0.405203
YLR262C-A	1	-0.198074
YLR266C	1	1.29032
YLR267W	1	2.73967
YLR270W	1	0.180146
YLR276C	1.48848	none
YLR277C	1.66035	none
YLR284C	1.58211	none
YLR290C	1	-3.08203
YLR294C,YLR295C	1	0.976562
YLR297W	1	1.2857
YLR298C	1	-1.69451
YLR300W	3.32308	none
YLR301W	1	1.95694
YLR303W	1	-0.305991
YLR304C	1	0.306054
YLR305C	2.12181	none
YLR311C	1	6.00551
YLR312C	1	1.64466
YLR315W	1	0.280104
YLR316C	1.23012	none
YLR317W	5.93756	none
YLR319C	1	2.59887
YLR325C	1.06189	none
YLR326W	1	0.0817958
YLR328W	1.01192	none
YLR330W	1	1.65931
YLR332W	1	1.25073
YLR333C	1	1.48766
YLR334C	1	5.46816
YLR337C	1	-1.40743
YLR342W	1.19779	none
YLR343W	1	-0.543458
YLR344W	1	0.498629
YLR345W	1	0.0955742
YLR349W	1	1.86882
YLR350W	1	0.0290139
YLR352W	2.11226	none
YLR356W	1	1.49295
YLR357W	1	0.164691
YLR358C	1	-0.361057
YLR359W	1	6.9809
YLR361C-A	1	-0.379237
YLR367W	1.10041	none
YLR373C	1.16521	none
YLR381W	1.25131	none
YLR383W	1.09052	none
YLR384C	1.24029	none
YLR390W-A	1	-0.803094
YLR395C	1	1.47101
YLR396C	1.35255	none
YLR397C	1.39729	none
YLR399C	1	-0.437369
YLR399W-A	1	0.258341
YLR402W	1.5301	none
YLR403W	1	1.60338
YLR405W	1	2.33133
YLR406C	1.25318	none
YLR407W	1	-0.0180319
YLR418C	1.03978	none
YLR419W	1.03286	none
YLR420W	1.2471	none
YLR421C	1.32703	none
YLR423C	1	5.16416
YLR424W	1	2.19559
YLR427W	2.51362	none
YLR432W	1	4.62223
YLR435W	1.71677	none
YLR436C	1	0.375169
YLR437C	1	0.676261
YLR437C-A	1	0.317577
YLR438W	1	0.720726
YLR441C	1.19042	none
YLR442C	1.22541	none
YLR448W	1	3.24022
YLR449W	1.05743	none
YLR451W	1.92801	none
YLR455W	1	3.07351
YML002W	1	0.528317
YML003W	1	3.09912
YML004C	1	1.35289
YML007W	1	-3.17397
YML008C	1.14898	none
YML009C	1	1.03192
YML012C-A	1.5854	none
YML014W	2.05447	none
YML015C	1.69473	none
YML016C	2.94101	none
YML019W	1.17699	none
YML024W	1	2.54318
YML025C	1	-2.33444
YML026C	1.07088	none
YML032C	1.58408	none
YML034C-A	1	0.783661
YML034W	1	0.705029
YML042W	1	-0.764352
YML043C	1	-2.47185
YML047C	1	0.475473
YML048W	1.04993	none
YML049C	1.22373	none
YML051W	1	-0.232242
YML052W	1	-0.164089
YML053C	1	4.72068
YML054C	1	3.81424
YML058W	1	-0.19568
YML062C	1	4.50594
YML063W	1.09809	none
YML065W	1	5.43245
YML069W	1	1.37462
YML070W	1	1.20708
YML072C	1.00279	none
YML073C	1	4.16848
YML074C	1.57488	none
YML075C	1.30155	none
YML080W	1	0.867779
YML081C-A	1	0.897196
YML086C	1.27256	none
YML089C	1	1.82436
YML090W	1.21717	none
YML091C	1	2.63657
YML092C	1.31994	none
YML093W	1	3.30392
YML096W	1.93439	none
YML097C	1	2.2721
YML099C	1.29585	none
YML100W	1	1.25204
YML101C	1	2.10661
YML101C-A	1	-2.16355
YML103C	2.36023	none
YML112W	1	-0.283115
YML114C	2.09903	none
YML120C	1	0.470407
YML122C	1	1.77051
YML123C	1.32053	none
YML125C	1.46064	none
YML126C	1.79001	none
YML127W	1	1.50557
YML128C	1	0.500031
YML129C	1	0.627683
YML130C	1	-0.364761
YML131W	1.05619	none
YMR002W	1	0.193163
YMR003W	1	1.01414
YMR011W	1.23536	none
YMR012W	1.37416	none
YMR014W	1.30794	none
YMR015C	1.87365	none
YMR016C	1	0.782973
YMR020W	1.1619	none
YMR021C	1	0.136981
YMR022W	1	-0.439345
YMR026C	2.15574	none
YMR027W	1	-4.33006
YMR030W	1	1.51302
YMR031C	1	0.131894
YMR034C	1.25265	none
YMR036C	1	1.66588
YMR037C	1	0.946228
YMR038C	1.13988	none
YMR039C	1	1.59776
YMR040W	1.44635	none
YMR041C	1	0.875897
YMR042W	1	1.76417
YMR043W	1	2.26295
YMR044W	1	2.96997
YMR045C	1	-1.41336
YMR049C	1	2.19228
YMR052W	1.08162	none
YMR056C	1.29381	none
YMR062C	1	-1.62216
YMR066W	1	-0.921517
YMR069W	1	-1.91492
YMR070W	1	0.990076
YMR073C	1	-1.07931
YMR076C	2.42412	none
YMR079W	1.21356	none
YMR081C	1	0.853411
YMR083W	1	-0.181314
YMR084W	1.69532	none
YMR085W	1	3.19521
YMR088C	1	4.50607
YMR090W	1	5.92369
YMR092C	1.21733	none
YMR093W	1.31062	none
YMR099C	1.99409	none
YMR102C	1	1.77377
YMR103C	1	-0.13143
YMR104C	1	0.109149
YMR105C	1	3.49172
YMR107W	1	1.19784
YMR108W	1	-0.287618
YMR109W	1	1.30569
YMR114C	1	-1.53675
YMR118C	1	0.702797
YMR121C	1.41297	none
YMR124W	1.00007	none
YMR128W	1	1.92621
YMR130W	1	4.71004
YMR131C	1.07608	none
YMR133W	1	-0.303883
YMR134W	1.65392	none
YMR135C	1	0.966936
YMR140W	1	0.930375
YMR141C	1	-0.762416
YMR142C	1	2.60665
YMR143W	1.36381	none
YMR159C	1.04986	none
YMR161W	1	1.53483
YMR165C	1	-0.249488
YMR168C	1	-1.13112
YMR169C	1	2.71656
YMR171C	1	0.297094
YMR172C-A	1	1.27304
YMR173W,YMR173W-A	1.22545	none
YMR174C	1	-1.15416
YMR175W	1	-0.0976509
YMR181C	1	0.523539
YMR182C	1	2.57351
YMR184W	1	0.993898
YMR185W	1	2.70719
YMR186W	1	0.555609
YMR188C	1	0.269334
YMR193C-A	1	2.86851
YMR194C-A	1.3103	none
YMR194C-B	1	2.77938
YMR195W	1.09391	none
YMR196W	1	0.107017
YMR201C	1	-0.224813
YMR202W	2.01067	none
YMR205C	1	2.15155
YMR206W	1	0.725892
YMR208W	1.22562	none
YMR212C	1.88641	none
YMR214W	1	1.2053
YMR215W	1	1.90847
YMR216C	1	0.0925497
YMR217W	1.85209	none
YMR218C	1	1.413
YMR219W	1.09076	none
YMR227C	1.10768	none
YMR228W	1.21013	none
YMR229C	1	4.79296
YMR235C	1.31749	none
YMR238W	1.17394	none
YMR240C	1	3.42576
YMR242C	1.10096	none
YMR243C	1	0.491849
YMR245W	1.77489	none
YMR251W	1.39327	none
YMR252C	1	0.322999
YMR253C	1	0.939284
YMR254C	1	1.09272
YMR255W	1	-0.338193
YMR256C	1	0.386385
YMR260C	1.55907	none
YMR263W	1.04305	none
YMR266W	1	3.35942
YMR267W	1.45487	none
YMR271C	1	3.61576
YMR272C	1	1.04638
YMR272W-A	1	1.51111
YMR273C	1.60929	none
YMR274C	1.61714	none
YMR276W	3.22012	none
YMR280C	1	4.46319
YMR281W	1	2.25818
YMR286W	1	-0.480547
YMR288W	1.1772	none
YMR290W-A	1.53771	none
YMR291W	1	6.69467
YMR295C	1	-0.346582
YMR297W	1	-0.343732
YMR298W	1	-0.109817
YMR302C	1	0.497977
YMR304C-A,YMR305C	1.4545	none
YMR304W	2.33703	none
YMR307W	1	3.28532
YMR309C	1.17344	none
YMR311C	1	-0.0543896
YMR313C	1	1.47502
YMR314W	1	0.15181
YMR315W	1	0.419997
YMR316C-A	1.34608	none
YMR316W	1.12868	none
YMR317W	1	0.155941
YMR320W	1	0.177181
YMR323W	1	1.48471
YNL001W	1	0.843099
YNL005C	1	0.80516
YNL006W	1	1.69638
YNL007C	1	0.673851
YNL009W	1	-0.530486
YNL011C	1	0.165451
YNL012W	1	2.331
YNL014W	1	1.71653
YNL015W	1	-0.0617094
YNL024C-A	1	2.95359
YNL034W	1	0.643241
YNL036W	1	0.249892
YNL037C	1	2.66461
YNL042W	1	3.83739
YNL042W-B	1.12197	none
YNL044W	1	1.16686
YNL046W	1	-1.11941
YNL049C	1.25083	none
YNL050C	1.68984	none
YNL052W	1	0.647228
YNL055C	1	0.642205
YNL059C	1.26818	none
YNL061W	1.42182	none
YNL063W	1	3.55432
YNL064C	1	-0.0590437
YNL067W	1	-0.418445
YNL069C	1	0.601624
YNL074C	1	-0.302235
YNL076W	1	1.14066
YNL077W	1	1.46414
YNL079C	1	-2.67804
YNL080C	1	1.79773
YNL081C	1	0.226121
YNL085W	1.47849	none
YNL087W	1	4.81053
YNL091W	1.23725	none
YNL093W	1.87699	none
YNL097C	1	-1.12322
YNL097W-A	1	-0.776247
YNL098C	1	1.63489
YNL099C	1	2.13122
YNL100W	1	1.1351
YNL101W	1	-1.18214
YNL103W	1	0.736866
YNL110C	1.49739	none
YNL112W	1.46475	none
YNL115C	1.18027	none
YNL116W	1	0.231598
YNL117W	1	0.822754
YNL119W	2.36364	none
YNL121C	1.19511	none
YNL123W	1	5.01338
YNL124W	1	3.39306
YNL125C	1	0.396598
YNL129W	1.63227	none
YNL130C	1.36574	none
YNL133C	1	1.60748
YNL134C	1.89241	none
YNL137C	2.88865	none
YNL141W	1	1.59141
YNL143C	1	0.78626
YNL144C	1	2.02776
YNL146C-A	1.1098	none
YNL147W	1	0.738371
YNL153C	3.6659	none
YNL155W	1	-4.61891
YNL156C	1.21242	none
YNL158W	1	-0.23402
YNL159C	1	1.23407
YNL160W	1.67016	none
YNL162W	1.49261	none
YNL163C	3.38182	none
YNL174W	1.27483	none
YNL175C	1	2.21086
YNL178W	1	3.37434
YNL180C	1	0.628541
YNL181W	1.46928	none
YNL183C	1	-5.52414
YNL189W	1.54073	none
YNL190W	1	-1.09336
YNL191W	1	1.38949
YNL192W	1	-0.289555
YNL193W	1	2.83339
YNL194C	1	1.678
YNL195C	1	0.393403
YNL196C	1.41082	none
YNL197C	1	1.36428
YNL198C,YNL199C	1.0171	none
YNL200C	1	1.72672
YNL202W	1	1.72471
YNL209W	1.18878	none
YNL219C	1.50129	none
YNL222W	1.72216	none
YNL225C	1	1.68821
YNL236W	1.53806	none
YNL240C	1	1.5356
YNL241C	1	0.994404
YNL244C	1	-0.50743
YNL246W	1	2.68928
YNL247W	1.51242	none
YNL248C	1.6102	none
YNL250W	1.57782	none
YNL255C	1.73346	none
YNL259C	2.86566	none
YNL260C	1	0.956139
YNL261W	2.21376	none
YNL262W	3.67162	none
YNL263C	2.39446	none
YNL265C	1.03759	none
YNL267W	1.5722	none
YNL268W	1.76514	none
YNL269W	1	-0.14006
YNL270C	1	-2.40544
YNL272C	1	2.26878
YNL276C	1	1.61007
YNL277W	1	1.37523
YNL284C	1	0.337345
YNL284C-B	1	0.130804
YNL285W	1	1.98096
YNL286W	1.05098	none
[truncated: 493 more rows]

## Sheet: H3D_H3HK4R1
genes	MID	GSS
YAL004W	1	0.268011
YAL005C	1	0.322081
YAL010C	1.06159	none
YAL017W	1	-0.597507
YAL018C	1	-0.482642
YAL019W	1	1.01113
YAL021C	1	1.34504
YAL025C	1	2.61891
YAL028W	1	0.476252
YAL031C	1.5949	none
YAL033W	1.24277	none
YAL034C	1	0.652683
YAL034W-A	1.21783	none
YAL035W	1.30572	none
YAL036C	1.30178	none
YAL039C	1	0.829444
YAL041W	1.46059	none
YAL043C	1.10124	none
YAL051W	1	1.6274
YAL053W	5.25611	none
YAL054C	1	1.59683
YAL055W	1	1.88542
YAL056W	1	-1.30601
YAL059W	1	4.0947
YAL060W	1	0.123252
YAL061W	1	2.91519
YAL062W	1	1.57553
YAL067C	4.81016	none
YAR007C	1.78632	none
YAR009C	1	0.838851
YAR015W	1.0894	none
YAR023C	1	0.779915
YAR028W	1	1.30767
YAR035W	2.09877	none
YAR053W	1	-5.38634
YBL001C	1	-0.411779
YBL004W	1.6964	none
YBL006C	1	9.87482
YBL012C	1	-1.25904
YBL013W	1	0.637802
YBL015W	1	1.21518
YBL021C	1	1.10021
YBL022C	1.72253	none
YBL023C	1	5.39982
YBL024W	1	2.41129
YBL025W	1.98714	none
YBL027W	1	3.19284
YBL029C-A	1	-0.636909
YBL032W	1.08889	none
YBL033C	1	0.733402
YBL038W	1	-1.58995
YBL039C	1.22628	none
YBL041W	1	-3.32593
YBL043W	1	0.40736
YBL045C	1	-0.0788777
YBL048W	1	0.131719
YBL049W	1	0.125297
YBL050W	1	1.5223
YBL054W	1	0.766602
YBL058W	1	-0.704724
YBL064C	1	0.0572047
YBL066C	1	0.00103286
YBL067C	1	1.77793
YBL071C	1	3.26569
YBL071W-A	1	1.86835
YBL072C	1.30662	none
YBL075C	1	2.53034
YBL076C	1	1.06521
YBL078C	1	-0.512564
YBL086C	1	1.88478
YBL087C	1	4.73522
YBL092W	2.53399	none
YBL093C	1	-1.46867
YBL104C	1.01209	none
YBL111C,YBL112C,YBL113C	1.77508	none
YBR002C	1	1.26894
YBR003W	1	-1.08915
YBR006W	1	0.972047
YBR010W	1	0.406036
YBR011C	1	0.888249
YBR015C	1.04756	none
YBR016W	1	-1.29351
YBR017C	1.36423	none
YBR023C	1.56976	none
YBR026C	1.89644	none
YBR029C	1.21503	none
YBR031W	3.49814	none
YBR034C	1	4.91729
YBR036C	1	-2.87817
YBR037C	1	0.421765
YBR039W	1	0.0210627
YBR041W	1.38544	none
YBR043C	1	1.21673
YBR046C	1.88016	none
YBR048W	1.44375	none
YBR049C	1	2.68305
YBR050C	2.8619	none
YBR052C	1	0.373665
YBR054W	1	9.13116
YBR056W-A	1	1.11361
YBR058C	1.75187	none
YBR063C	1	-0.344834
YBR064W	1	0.719408
YBR065C	1	2.07139
YBR066C	1	2.14713
YBR068C	1	1.60563
YBR069C	1	2.81652
YBR070C	1	1.06408
YBR071W	1	-0.450912
YBR072W	1	4.18163
YBR076C-A	1	-0.467891
YBR077C	1	1.37321
YBR078W	1	2.37813
YBR079C	1	2.358
YBR080C	1	1.38488
YBR082C	1	0.665259
YBR084C-A	1	6.87924
YBR084W	1.1712	none
YBR089C-A,YBR090C	1	-1.30527
YBR101C	1	1.65656
YBR102C	1.1618	none
YBR105C	1	1.56941
YBR106W	2.4863	none
YBR111C	1	1.85424
YBR114W	1	1.46611
YBR116C,YBR117C	1	2.12643
YBR120C	1	2.14397
YBR121C	1.44711	none
YBR124W	1.59547	none
YBR126C	1	1.308
YBR126W-A,YBR126W-B	1	0.272184
YBR130C	1.08443	none
YBR131W	1	0.294273
YBR132C	1.09673	none
YBR135W	1	-4.73476
YBR142W	1.08417	none
YBR143C	1	4.69737
YBR147W	1	0.631785
YBR151W	1	0.554649
YBR154C	1	3.86278
YBR155W	1	1.59914
YBR156C	2.33534	none
YBR162C	1.67402	none
YBR164C	1.80316	none
YBR165W	1	-1.30983
YBR169C	1	0.789124
YBR171W	1	2.97976
YBR173C	1.34071	none
YBR177C	1	0.766914
YBR181C	1	3.85968
YBR182C	1.13346	none
YBR183W	1.62773	none
YBR187W	1.39556	none
YBR189W	1.28516	none
YBR190W,YBR191W	1.10226	none
YBR199W	1	-1.59357
YBR201C-A	1	-2.00302
YBR208C	2.14549	none
YBR210W	1	-1.08615
YBR214W	1	0.261333
YBR217W	1	-1.73117
YBR222C	1	-1.7959
YBR229C	2.90213	none
YBR230C	1	0.634119
YBR231C	1.47514	none
YBR233W	1.79066	none
YBR238C	1.50184	none
YBR242W	1	2.72043
YBR243C	1.17901	none
YBR244W	1	4.00067
YBR245C	1	2.96054
YBR246W	1.55798	none
YBR247C	1.06932	none
YBR248C	1	3.9257
YBR249C	1.38732	none
YBR250W	1	1.96216
YBR251W	1	8.96944
YBR253W	1.34593	none
YBR254C	1.54727	none
YBR255C-A	1.79741	none
YBR255W	1	1.7532
YBR257W	1	3.55624
YBR259W	2.53133	none
YBR260C	1.36869	none
YBR263W	2.4116	none
YBR265W	1	4.1313
YBR266C	1	1.94981
YBR269C	1	-1.85222
YBR275C	1	4.80138
YBR280C	2.15998	none
YBR281C	1.72464	none
YBR285W	1	2.0531
YBR287W	1.07608	none
YBR289W	1.17968	none
YBR290W	1	-2.09089
YBR291C	2.84991	none
YBR295W	1	2.84401
YBR296C	1.02999	none
YCL001W-B	1	-2.53682
YCL002C	1	2.20163
YCL011C	1	-1.37001
YCL017C	1	-1.97393
YCL025C	1	-4.60066
YCL026C-A	1	-0.366137
YCL034W	1	-0.655759
YCL035C	1	-0.531039
YCL040W,YCL042W	1	0.406838
YCL041C,YCL043C	1	-2.09632
YCL045C	1	4.52282
YCL046W	1.49813	none
YCL048W-A	1	-1.77361
YCL050C	1.09	none
YCL052C	1	-0.4893
YCL054W	1.07699	none
YCL057C-A	1	1.58177
YCL059C	1.92965	none
YCL064C	1.20743	none
YCR004C	1	1.62842
YCR005C	1.01098	none
YCR006C	1	2.12181
YCR008W	1	1.13999
YCR009C	1	-1.09553
YCR010C	1	1.75459
YCR012W	1	-2.83459
YCR013C	1	-1.06348
YCR016W	1.50072	none
YCR020C-A	4.58362	none
YCR021C	1	1.28489
YCR023C	1	5.20482
YCR024C-A	1.36257	none
YCR024C-B	1.38054	none
YCR028C-A	1	3.13166
YCR034W	1.88851	none
YCR035C	1	2.09003
YCR037C	1.51383	none
YCR043C	1.3513	none
YCR045C	1	0.22362
YCR047W-A	1	1.93225
YCR052W	1	2.92419
YCR053W	1	3.97724
YCR060W	1	2.71647
YCR068W	1	1.17146
YCR073W-A	1	0.10325
YCR077C	1.085	none
YCR081W	1.60268	none
YCR082W	1	-2.06249
YCR083W	1	0.552229
YCR086W	1	3.74887
YCR090C	1.87299	none
YCR091W	1	2.27893
YCR093W	1.59923	none
YCR094W	1.3519	none
YCR095C	3.97658	none
YCR107W	1	1.50734
YDL001W	1	1.7684
YDL002C	1	3.19837
YDL004W	1	0.754753
YDL005C	1	0.855337
YDL007W	2.14045	none
YDL012C	1	3.73582
YDL014W	1	0.855395
YDL019C	1.63481	none
YDL020C	1	-1.02875
YDL022C-A,YDL024C	1	3.02712
YDL022W	1	1.1228
YDL023C	1	0.739606
YDL025C	1	2.0721
YDL025W-A	1	1.13332
YDL026W	1	1.71815
YDL031W	1	1.15585
YDL032W	1	1.90551
YDL040C	1	4.06781
YDL042C	1	-1.1399
YDL043C	1	2.40614
YDL044C	1	5.71812
YDL045C	1	0.875774
YDL046W	1	0.259489
YDL047W	1	2.29373
YDL050C	1.92211	none
YDL055C	4.15019	none
YDL062W	1	0.876472
YDL067C	1	-0.745229
YDL068W	1.02145	none
YDL070W	1	2.19033
YDL071C	1	-0.528886
YDL073W	1.65672	none
YDL075W	1.00731	none
YDL076C	1	0.237993
YDL079C	1	1.4091
YDL081C	4.45798	none
YDL082W	1.40353	none
YDL083C	1	2.20574
YDL085C-A	1.43575	none
YDL085W	1	-0.812212
YDL097C	2.6278	none
YDL099W	1.84049	none
YDL100C	2.31318	none
YDL102W	2.83218	none
YDL103C	2.36677	none
YDL106C	1.85052	none
YDL110C	1.79004	none
YDL112W	1.86958	none
YDL113C	1	0.505037
YDL116W	1	2.21343
YDL117W	1.80542	none
YDL121C	1	6.45596
YDL123W	1	1.13391
YDL124W	1	0.728012
YDL125C	1	-0.286237
YDL126C	1.84109	none
YDL127W	3.68449	none
YDL128W	1	-0.860159
YDL129W	1	1.73613
YDL130W-A	1	-0.0862417
YDL131W	1	2.54363
YDL132W	1.88856	none
YDL133W	1	1.31656
YDL137W	1	0.603379
YDL138W	1	1.30715
YDL143W	1.38738	none
YDL144C	1	2.88464
YDL145C	1.18171	none
YDL146W	1.7561	none
YDL148C	1.24033	none
YDL150W	1.40404	none
YDL153C	1.21837	none
YDL155W	1.31431	none
YDL156W	1	1.22181
YDL157C	1	3.32152
YDL159W	1	-0.00471728
YDL161W	1	2.93916
YDL163W	1	3.34572
YDL166C	1	2.42762
YDL168W	2.82396	none
YDL169C	1	0.484672
YDL170W	1	1.43977
YDL173W	1.11885	none
YDL174C	1	2.39937
YDL180W	1	1.78638
YDL181W	1	2.40304
YDL182W	1	0.725366
YDL183C	1	0.0901802
YDL186W	2.33911	none
YDL192W	1	4.77874
YDL197C	1	0.551203
YDL201W	1	2.38466
YDL206W	1	2.20693
YDL208W	1.70368	none
YDL214C	1	1.87802
YDL218W	1	0.941046
YDL221W	1	-3.15325
YDL222C	1	0.350004
YDL223C	1	-1.35177
YDL225W	1	6.08278
YDL226C	1.10531	none
YDL228C	1.23834	none
YDL229W	1.28495	none
YDL230W	1	0.362292
YDL231C	1	-2.33574
YDL243C	1.11371	none
YDR001C	1	0.453758
YDR002W	1	0.556801
YDR003W	1	2.31751
YDR003W-A	1.15053	none
YDR006C	1	-0.368797
YDR007W	1	1.35812
YDR008C	1	1.87047
YDR009W	1	-0.276916
YDR011W	1	-1.15696
YDR012W	1	2.94623
YDR017C	1.01809	none
YDR018C	1	-0.125257
YDR019C	1	2.23038
YDR023W	1.11678	none
YDR025W	1	2.34862
YDR026C	1	0.439526
YDR029W	1	1.02931
YDR031W	1	1.1423
YDR034C	1	2.31404
YDR034C-A	1	0.223365
YDR034W-B	1	-0.791217
YDR035W	1	1.84882
YDR036C	1	0.75027
YDR037W	1	6.91914
YDR040C	1	1.27252
YDR041W	1	1.17685
YDR042C	1	1.37857
YDR043C	1	1.13481
YDR046C	1.07555	none
YDR049W	1	1.8415
YDR054C	1	2.10956
YDR055W	1.34232	none
YDR059C	1	0.0965221
YDR060W	1	5.10264
YDR062W	1	2.75245
YDR064W	1	2.84947
YDR065W	1.08193	none
YDR069C	1.01489	none
YDR070C	1	0.868537
YDR071C	1	-0.295758
YDR072C	1	-0.826225
YDR073W	1	2.08038
YDR074W	1	1.40642
YDR078C	1	3.22025
YDR079W	1	1.66626
YDR087C	1	0.687289
YDR088C	1	1.77586
YDR089W	1	1.16132
YDR090C	2.66087	none
YDR091C	1	1.36556
YDR096W	1	2.65122
YDR099W	1	-0.997135
YDR104C	1	0.605052
YDR111C	1	-0.372041
YDR115W	1	0.227873
YDR117C	1	3.29842
YDR119W-A	1	-0.797747
YDR121W	1.30051	none
YDR125C	1	0.777186
YDR127W	1	5.87086
YDR129C	1.20057	none
YDR133C	1	-1.18785
YDR139C	2.21812	none
YDR147W	1	3.37971
YDR148C	1	0.0862103
YDR149C	1	3.14988
YDR150W	1	-2.68146
YDR151C	1	1.86965
YDR152W	1	-1.33581
YDR153C	1	2.20558
YDR154C,YDR155C	1	0.87852
YDR156W,YDR157W	1	2.82307
YDR161W	1.70753	none
YDR162C	9.03609	none
YDR164C	1.27209	none
YDR165W	1.42326	none
YDR171W	1	0.281552
YDR173C	1	-0.775104
YDR174W	1.77769	none
YDR178W	1	0.159926
YDR181C	1	3.35801
YDR182W	1	3.24083
YDR185C	1	2.03959
YDR186C	1	0.158658
YDR189W	1.49515	none
YDR190C	1	7.52095
YDR191W	1	5.12368
YDR193W	1.52686	none
YDR197W	1	6.09511
YDR202C	1	-0.835332
YDR203W	1	-0.289683
YDR207C	1.81682	none
YDR208W	1	0.455367
YDR209C	1	7.85033
YDR210C-D	1	1.15718
YDR212W	1.07588	none
YDR213W	1	0.0508192
YDR214W	1.01569	none
YDR216W	1	4.14973
YDR218C	1	-0.580525
YDR219C	1	1.13424
YDR221W	1.17889	none
YDR222W	1.11237	none
YDR226W	1	2.82997
YDR230W	1	0.146063
YDR231C	1	0.584537
YDR232W	1	-0.544587
YDR239C	1	4.49028
YDR244W	1	2.98374
YDR245W	1	0.990737
YDR246W	1	2.01441
YDR247W	1	3.24066
YDR249C	1	0.565824
YDR251W	1	-0.54219
YDR253C	1	-0.124496
YDR255C	1	1.14978
YDR256C	1	0.397455
YDR258C	1	1.21414
YDR261C-D	1	-2.25514
YDR262W	1	0.799271
YDR267C	1	6.2539
YDR272W	1	0.823693
YDR273W	1	1.17856
YDR275W	1	3.20006
YDR276C	1	0.24547
YDR277C	1	2.13471
YDR284C	1.38086	none
YDR285W	1	6.42628
YDR291W	1.09222	none
YDR292C	1.07298	none
YDR294C	1.41963	none
YDR295C	1.84418	none
YDR297W	2.72085	none
YDR299W	1	1.53526
YDR300C	1.25948	none
YDR301W	1.17427	none
YDR303C	1.43998	none
YDR305C	2.20737	none
YDR312W	1	1.84012
YDR313C	1	0.617472
YDR322C-A	1	1.90538
YDR323C	1	2.33515
YDR325W	1	2.3135
YDR326C	1	3.29819
YDR329C	1	-1.11544
YDR334W	1	3.28429
YDR341C	1	8.17989
YDR342C	1	1.15525
YDR344C	1	-1.71566
YDR349C	1	-0.805817
YDR354W	1	3.42284
YDR357C	1	-1.18278
YDR358W	1	0.843355
YDR361C	1	3.18108
YDR363W-A	1.87587	none
YDR365C	1	2.27581
YDR371W	1.52421	none
YDR372C	1.19949	none
YDR374C	1	-0.490106
YDR377W	1	1.78102
YDR379C-A	1	-1.43849
YDR380W	1.06424	none
YDR384C	1	1.29392
YDR385W	1.24022	none
YDR394W	3.19066	none
YDR395W	1	1.38027
YDR397C	1	1.95536
YDR398W	1	3.94458
YDR403W	1	-5.26542
YDR405W	1	1.53903
YDR407C	1.27298	none
YDR408C	1	4.10096
YDR411C	1.6781	none
YDR413C	1	1.64506
YDR417C	1	4.91891
YDR418W	1	4.32622
YDR419W	1	3.88426
YDR420W	1.35033	none
YDR423C	1	1.34409
YDR427W	1.406	none
YDR428C	1	1.59945
YDR429C	1	4.8065
YDR432W,YDR433W	1	-1.23661
YDR434W	2.50148	none
YDR435C	1	-0.525198
YDR437W	1.49738	none
YDR440W	1	3.18054
YDR447C	1	6.33486
YDR448W	1	1.11006
YDR449C	1.06796	none
YDR458C	1	0.0326189
YDR460W	1	-0.706954
YDR461C-A	1	0.738784
YDR461W	1	0.618263
YDR463W	1	0.693585
YDR465C	1.05711	none
YDR466W	1	7.12413
YDR467C	1	1.45385
YDR469W	1.45826	none
YDR471W	1	-0.00164933
YDR475C	1.03971	none
YDR476C	1	1.37928
YDR480W	1	0.805028
YDR481C	1	-0.342721
YDR482C	1	0.585965
YDR484W	1	0.107473
YDR490C	1	-0.640135
YDR491C	1.09255	none
YDR492W	1	2.13572
YDR494W	1	-4.12475
YDR496C	1	2.52344
YDR497C	1.79292	none
YDR498C	1.81469	none
YDR499W	1.85319	none
YDR501W	1	0.0415861
YDR505C	1	-0.585252
YDR508C	1	0.630808
YDR509W	1	0.641944
YDR510W	1	2.28164
YDR511W	1	1.02279
YDR512C	1	0.463935
YDR513W	1	0.224317
YDR516C	1	0.357486
YDR517W	1	1.42115
YDR519W	1	3.05327
YDR524C-B	1	-0.149672
YDR525W-A	1	0.58361
YDR527W	1	2.17643
YDR528W	1.09288	none
YDR529C	1	0.228022
YDR530C	1	0.847268
YDR535C	1.14693	none
YDR536W	1	4.5877
YEL002C	1.80752	none
YEL003W	2.77366	none
YEL006W	1	-1.43666
YEL009C	1	-2.14531
YEL011W	1	1.46165
YEL012W	1	0.589121
YEL013W	2.11821	none
YEL015W	1.221	none
YEL019C	1	0.894787
YEL022W	1	0.847936
YEL023C	3.57988	none
YEL024W	1	0.878009
YEL026W	1	2.78834
YEL031W	2.4171	none
YEL033W	1	-1.17735
YEL034C-A	1	-1.89752
YEL034W	1	-0.780406
YEL036C	1	-0.793778
YEL038W	1	0.82135
YEL039C	1	0.85889
YEL040W	1.29616	none
YEL042W	1.46598	none
YEL043W	1.51418	none
YEL044W	1	1.0018
YEL047C	2.68521	none
YEL053W-A	1.36359	none
YEL054C	1.26408	none
YEL058W	1	0.361208
YEL059C-A	1.77115	none
YEL060C	1	-0.687479
YEL068C	1	3.68178
YEL070W	1	-1.05282
YEL071W	1	1.23372
YEL073C	1	1.34548
YER001W	1	1.58691
YER002W	3.13887	none
YER003C	1.81616	none
YER005W	1	1.79586
YER006W	1	4.38896
YER007C-A	1.98154	none
YER009W	1	2.6899
YER012W	2.32722	none
YER014W	1.10579	none
YER017C	1	-1.77631
YER019C-A	1	0.397414
YER020W	1	1.78598
YER021W	6.78377	none
YER022W	1	4.85809
YER023C-A	1.36194	none
YER023W	1.18622	none
YER024W	1.3331	none
YER027C	1	4.11144
YER028C	1	3.76092
YER032W	2.12332	none
YER034W	1	0.270039
YER035W	1	0.977184
YER036C	1	0.539218
YER037W	1	0.133991
YER043C	1	3.68028
YER044C-A	4.17979	none
YER048W-A	1	0.91582
YER050C	1	-0.211436
YER053C-A	1	0.845842
YER054C	1	1.7716
YER055C	1	1.76314
YER056C	1.16404	none
YER058W	1.19329	none
YER061C	1.19241	none
YER062C	1	1.89637
YER063W	1.04388	none
YER064C	1	2.20771
YER065C	1.37051	none
YER066C-A	1	2.07061
YER067C-A	1	0.382715
YER067W	1	0.417827
YER068C-A	1.85939	none
YER068W	1	0.506394
YER072W	1	6.39183
YER073W	1.04615	none
YER074W	1.49786	none
YER074W-A	1	-0.18677
YER079W	1	0.831143
YER082C	1	4.11323
YER084W	1	1.79342
YER086W	1.17317	none
YER088C	1	2.32623
YER088C-A,YER089C	2.02885	none
YER090W	1.31091	none
YER091C	1.81056	none
YER092W	1	2.15407
YER093C	1	-1.88551
YER095W	1	0.129975
YER096W	1	1.5201
YER097W,YER098W	1	-0.324784
YER103W	1	2.54808
YER104W	1.37378	none
YER106W	1	2.9313
YER107W-A	1.36484	none
YER110C	1.23739	none
YER111C	1.891	none
YER116C	1	2.163
YER117W	1.76332	none
YER123W	1.87348	none
YER125W	1	-2.06512
YER126C	1	2.79624
YER127W	1	3.71124
YER131W	1	5.22421
YER133W	1	1.25229
YER135C	1	0.612591
YER141W	1	1.54207
YER145C	1	-0.180019
YER146W	1	0.619171
YER147C	1	0.134497
YER147C-A	1	0.710289
YER148W	1	1.01662
YER149C	1	3.34425
YER150W	1	0.71397
YER156C	1	-0.272056
YER157W	1	0.934355
YER158W-A	1	1.81224
YER159C	1	0.961007
YER162C	1	1.6092
YER164W	1	1.70829
YER165W	1.62518	none
YER167W	1	0.234523
YER169W	1	1.55295
YER171W	2.26576	none
YER177W	1	-1.40069
YER178W	1	-1.8474
YER180C	1	-2.27997
YER180C-A	1	-0.65705
YER182W	1	-0.297486
YER185W	1	1.31441
YER186C	1	2.21176
YFL007W	1.03257	none
YFL008W	2.80227	none
YFL010W-A	1	4.32931
YFL011W	1	-0.485983
YFL013W-A	1.07955	none
YFL015C	1	0.384826
YFL016C	1	1.28488
YFL017C	1	2.13925
YFL017W-A	1	1.70473
YFL018C	1	-1.17734
YFL021C-A	1	2.48466
YFL021W	1	-2.87022
YFL024C	1.04368	none
YFL025C	2.79431	none
YFL027C	1	4.61337
YFL030W	1.18223	none
YFL031W,YFL032W	1	0.0146921
YFL034C-A	1	1.42763
YFL034C-B	1.67196	none
YFL038C	1	-0.382597
YFL045C	1.49041	none
YFL046W	1.18742	none
YFL047W	1.15541	none
YFL052W	1	1.46255
YFL053W	1	4.90746
YFL054C	1	1.83468
YFL067W	2.66327	none
YFR003C	1	-0.794334
YFR004W	2.49609	none
YFR005C	1.90322	none
YFR009W	1.16041	none
YFR012W	1	0.624052
YFR015C	1	1.21996
YFR017C	1	1.006
YFR023W	1	3.47552
YFR029W	1	2.53777
YFR030W	1	3.02651
YFR031C	1	1.96432
YFR031C-A	1	1.43001
YFR032C-A	1	-3.65666
YFR033C	1	0.138735
YFR034C	1	0.185816
YFR037C	1.06925	none
YFR039C	1.51739	none
YFR040W	1	0.000486842
YFR041C	1.82561	none
YFR044C	1.05317	none
YFR050C	1.61309	none
YFR052C-A,YFR053C	1	2.01826
YFR054C	1	-0.142556
YGL002W	1	-0.377912
YGL003C	1	0.593436
YGL004C	1	1.07697
YGL010W	1	0.223675
YGL011C	3.25345	none
YGL016W	2.06452	none
YGL018C	1	1.87221
YGL020C	1.59516	none
YGL025C	1	0.651494
YGL026C	1.00653	none
YGL027C	1	3.16784
YGL031C	1.1595	none
YGL035C	1	1.81267
YGL036W	1	1.3249
YGL037C	1	0.386754
YGL040C	1.16663	none
YGL041C	1	2.22246
YGL045W	1.01106	none
YGL050W	1	5.2719
YGL051W,YGL052W	1	1.67893
YGL053W	1	1.53129
YGL054C	1	0.197933
YGL055W	2.55892	none
YGL058W	1	0.59705
YGL062W	1	2.41406
YGL063W	1	-0.149459
YGL065C	1	3.07525
YGL066W	1.06015	none
YGL069C	1	0.232058
YGL076C	1.16861	none
YGL077C	1.1322	none
YGL078C	1.00026	none
YGL080W	1.00443	none
YGL092W	1	4.49019
YGL093W	1.20317	none
YGL094C	1.29301	none
YGL098W	1	1.57086
YGL105W	1.39972	none
YGL108C	1.07188	none
YGL109W	1	1.04812
YGL112C	1.60042	none
YGL116W	3.54733	none
YGL120C	1	0.185438
YGL121C	1.033	none
YGL122C	1	-1.50693
YGL123W	1	-2.06879
YGL125W	1	-1.10206
YGL126W	1	2.55181
YGL127C	1	2.11465
YGL128C	1.43012	none
YGL133W	1	1.70951
YGL134W	2.06493	none
YGL137W	1	7.13598
YGL146C	1	2.06599
YGL147C	1.07245	none
YGL148W	1	1.80406
YGL151W	1	1.79929
YGL152C	1.19096	none
YGL155W	1.46458	none
YGL162W	1	2.12345
YGL163C	1	0.71376
YGL165C	1	1.70007
YGL166W	1	1.79818
YGL171W	1.19559	none
YGL173C	1.89214	none
YGL181W	1	0.0292074
YGL182C,YGL183C	1	2.64966
YGL184C	1	3.01827
YGL187C	1	0.805103
YGL189C	1	-5.4491
YGL190C	1	-1.36016
YGL191W	1	-0.00192227
YGL192W	1	0.1482
YGL193C	1	-0.679041
YGL196W	1	3.75029
YGL197W	2.01652	none
YGL198W	1	-4.28249
YGL203C	1	-0.598263
YGL205W	1	1.22848
YGL207W	1.47007	none
YGL213C	1	5.49374
YGL218W	1	0.360342
YGL219C	1	-0.479058
YGL220W	1	-1.43893
YGL228W	1	-0.724085
YGL229C	1	1.25976
YGL231C	4.02076	none
YGL234W	1	6.73501
YGL238W	1.79784	none
YGL245W	1.19576	none
YGL246C	1.38936	none
YGL248W	1	1.79447
YGL252C	1	-9.88116
YGL253W	1.01685	none
YGL255W	1	1.53515
YGL256W	1	1.42101
YGL259W	1	0.851369
YGL262W	1	-3.26726
YGR002C	1	-1.38602
YGR008C	1	0.327059
YGR009C	1	0.825398
YGR017W	1.56094	none
YGR018C	1.77341	none
YGR019W	1	1.06956
YGR021W	1	6.36162
YGR023W	1	3.38132
YGR024C	1	0.000254646
YGR028W	1	1.29223
YGR029W	1	0.625944
YGR030C	1	0.283922
YGR031C-A	1	1.86598
YGR031W	1	1.72386
YGR035W-A	1	-0.245332
YGR037C	1	0.217782
YGR043C	1	0.858367
YGR044C	1	0.660762
YGR046W	1	0.804545
YGR048W	1.08615	none
YGR050C	1	0.577002
YGR051C	1	2.99207
YGR053C	1.02658	none
YGR055W	1	3.16721
YGR057C	1	0.761768
YGR059W	1	1.20692
YGR060W	1.54359	none
YGR061C	1	8.66789
YGR064W	1	1.2039
YGR066C	1	2.44603
YGR067C	1	1.36372
YGR070W	1.51517	none
YGR072W	2.23024	none
YGR075C	1	0.459307
YGR078C	1	2.80024
YGR085C	1	1.57083
YGR086C	1	0.0499169
YGR088W	1	-0.808375
YGR089W	2.67385	none
YGR090W	1.45523	none
YGR093W	1	0.373625
YGR094W	1	4.18785
YGR096W	1.1541	none
YGR099W	1	2.75942
YGR101W	1	3.12761
YGR102C	1	1.09442
YGR103W	1	8.75027
YGR109C	1	0.00837762
YGR110W	1	1.78322
YGR113W	1.59536	none
YGR116W	1.41562	none
YGR118W	1	0.553309
YGR121C	1	0.143135
YGR122W	2.19619	none
YGR124W	1.85403	none
YGR127W	1.11182	none
YGR128C	1.00983	none
YGR130C	1	-3.10152
YGR132C	1	0.250757
YGR135W	1.45508	none
YGR141W	1	1.92547
YGR142W	1	1.20917
YGR143W	1	1.43793
YGR145W	1	0.694918
YGR146C	1	0.603442
YGR147C	1	2.47874
YGR151C,YGR152C	1	3.63429
YGR154C	1	1.73434
YGR158C	1.79413	none
YGR161C	1	0.163728
YGR161W-C	1	1.7034
YGR162W	1	3.73124
YGR169C-A	1	3.90432
YGR170W	2.51613	none
YGR172C	6.46413	none
YGR173W	1.80771	none
YGR174C	1	-0.342396
YGR175C	1	2.07708
YGR179C	1.53457	none
YGR180C	5.73873	none
YGR182C	1	0.686495
YGR183C	1	0.234833
YGR185C	1.50753	none
YGR189C	1.72047	none
YGR194C	1.24287	none
YGR197C	1	0.745266
YGR200C	1.19515	none
YGR201C	1	3.35505
YGR202C	1.00224	none
YGR203W	1	-0.111597
YGR205W	1.56184	none
YGR208W	1	1.26323
YGR209C	1	0.31682
YGR210C	1	4.34516
YGR211W	1	0.968472
YGR213C	1	1.40195
YGR214W	1.01478	none
YGR217W	1.00866	none
YGR224W	1	-1.1778
YGR227W	1	2.92248
YGR230W	1	-0.775698
YGR236C	1	0.12834
YGR239C	1	1.16734
YGR241C	1	1.61897
YGR242W	1	2.27525
YGR243W	1	-0.0376528
YGR248W	1	1.99995
YGR249W	1	2.38946
YGR250C	1	1.23928
YGR251W	1	0.206413
YGR256W	1	-1.19979
YGR265W	1.28573	none
YGR269W	1.01961	none
YGR270W	1	1.34879
YGR271W	2.29217	none
YGR275W	3.47679	none
YGR277C	1	2.9341
YGR278W	1.68224	none
YGR280C	1.60391	none
YGR281W	1.44438	none
YGR282C	1	-3.00373
YGR284C	1	0.236663
YGR285C	1	3.12486
YGR287C	1	-5.86506
YGR295C	1.61507	none
YHL008C	1	1.95915
YHL010C	1.32499	none
YHL011C	1	3.86892
YHL012W	1	1.40918
YHL013C	1	1.35565
YHL016C	1	-3.69522
YHL018W	1.20714	none
YHL021C	1	-0.236025
YHL022C	1	-1.37123
YHL025W	1	1.8419
YHL027W	1	0.912218
YHL030W	1.40835	none
YHL033C	1	0.952793
YHL034C	2.60079	none
YHL036W	1	2.39761
YHL038C	3.21659	none
YHL039W	1.29581	none
YHL050C	1	-4.95187
YHR001W-A	1	0.9963
YHR002W	1	1.56753
YHR006W	1	0.166522
YHR007C	1.54882	none
YHR009C	1	0.220217
YHR013C	1.47872	none
YHR016C	1	0.929342
YHR017W	1	0.20269
YHR018C	1	0.111
YHR019C	1.3102	none
YHR022C	1.10155	none
YHR024C	1.24061	none
YHR025W	1	2.97602
YHR029C	1	0.0336353
YHR031C	1	1.88087
YHR032W	1	-0.191131
YHR032W-A	1	2.25683
YHR033W	1	0.698419
YHR039C	2.31823	none
YHR044C	1	3.13804
YHR047C	1	4.4826
YHR048W	1	1.04227
YHR049C-A	1	0.804259
YHR050W	1	-0.373788
YHR051W	1	-0.109213
YHR052W	1	4.26157
YHR058C	1.84998	none
YHR062C	1.33508	none
YHR063C	1	3.35971
YHR064C	1.99604	none
YHR065C	1.58585	none
YHR066W	1	4.28801
YHR068W	1	1.82254
YHR070C-A	1	1.05666
YHR071W	1	2.53221
YHR072W-A	1	1.04298
YHR073W	1.40373	none
YHR076W	1	4.64141
YHR078W	1	0.145888
YHR079C	1	0.899014
YHR082C	1	0.694054
YHR085W	1.04421	none
YHR087W	1	1.59025
YHR088W	1	2.87624
YHR096C	1	2.01301
YHR097C	1	0.161736
YHR099W	1.96006	none
YHR104W	1	2.50642
YHR105W	1.16883	none
YHR108W	1.6731	none
YHR118C	1	2.61733
YHR119W	1.00609	none
YHR120W	1.99155	none
YHR123W	1.20748	none
YHR127W	1.41285	none
YHR128W	1.17608	none
YHR129C	1	3.20552
YHR136C	1	9.39189
YHR137C-A	1	0.751684
YHR137W	1	0.683054
YHR138C	1	0.115887
YHR139C	1	0.629331
YHR139C-A	2.30721	none
YHR141C	6.92502	none
YHR146W	1	-0.505241
YHR150W	1	0.678951
YHR155W	1.22206	none
YHR156C	3.10099	none
YHR158C	1	1.37022
YHR160C	1	0.577647
YHR161C	1	1.00517
YHR162W	1	0.80853
YHR164C	1	2.30349
YHR165C	1.63163	none
YHR169W	1	0.123942
YHR170W	1	2.84196
YHR178W	2.76204	none
YHR180W	1	2.006
YHR183W	1	0.994268
YHR186C	1	2.64444
YHR187W	1.3335	none
YHR190W	2.49901	none
YHR192W	1.00224	none
YHR199C	1	1.72007
YHR203C	1	3.15942
YHR206W	1	2.85701
YHR208W	1.5665	none
YHR216W	1	-0.110472
YIL002W-A	1	-2.67815
YIL004C	1	1.25057
YIL014C-A	2.1356	none
YIL019W	1	1.42271
YIL021C-A	1	1.18256
YIL021W	1	1.12113
YIL023C	1	0.182456
YIL024C	1.6389	none
YIL027C	1.70909	none
YIL030C	1.48578	none
YIL030W-A,YIL031W	1	1.35792
YIL033C	1	-0.150637
YIL035C	1	7.92065
YIL045W	1	1.99955
YIL046W	1	0.891659
YIL047C,YIL047C-A	1	-0.0517017
YIL050W	1	-0.65762
YIL052C	3.16601	none
YIL053W	2.8843	none
YIL055C	1	0.456398
YIL056W	1.23788	none
YIL057C	1	-1.49212
YIL059C	1	0.865152
YIL065C	1	1.99922
YIL066W-A	2.32155	none
YIL068C	1.23212	none
YIL069C	1.13299	none
YIL075C	4.29813	none
YIL077C	1	1.56737
YIL078W	1.38441	none
YIL079C	1	1.31295
YIL086C	1	-0.631648
YIL087C	1	0.780443
YIL090W	1	2.07302
YIL091C	1.56666	none
YIL093C	1	4.21884
YIL094C	2.35965	none
YIL096C	1	2.2179
YIL099W	1	1.48773
YIL101C	1	-0.0317794
YIL104C	1	0.498167
YIL105C	1	0.790628
YIL106W	1	0.452591
YIL111W	1	2.19769
YIL113W	1	0.541898
YIL115C	1.88918	none
YIL117C	1.83373	none
YIL118W	1	1.40351
YIL119C	1	-1.45785
YIL122W	1	3.13891
YIL123W	1	0.745306
YIL125W	1	-1.59642
YIL126W	1	0.481835
YIL128W	2.40849	none
YIL133C	1	-0.0709448
YIL135C	1	0.964656
YIL136W	1	0.440138
YIL138C	1.08187	none
YIL142W	1.10099	none
YIL143C	1	-0.362778
YIL144W	1	1.20889
YIL150C	1	2.20311
YIL152W	1.18573	none
YIL153W	1	2.71215
YIL155C	1.60525	none
YIL160C	1	0.519
YIL162W	1	0.958237
YIL164C	1	-0.613516
YIL169C	1.92798	none
YIR008C	2.03533	none
YIR012W	1.45229	none
YIR016W	1	1.11112
YIR017W-A	1	2.83848
YIR018W	1	1.87392
YIR022W	1.17578	none
YIR024C	3.29238	none
YIR026C	1.16268	none
YIR037W	3.04295	none
YIR039C	1	-0.427868
YJL001W	1.41989	none
YJL004C	1	-0.996978
YJL010C	1.22013	none
YJL013C	1.02271	none
YJL014W	1	3.11594
YJL019W	1	4.50275
YJL020C	1	0.442866
YJL033W	1	-0.936631
YJL034W	1	1.12345
YJL035C	1	0.857263
YJL036W	1	-2.56377
YJL037W	1	-0.796386
YJL038C	1	-0.643272
YJL039C	1	3.67151
YJL041W	1.28148	none
YJL042W	1	1.6252
YJL050W	1	0.572261
YJL052W	1	3.82551
YJL055W	1	1.79229
YJL056C	1	-0.765109
YJL060W	1	-1.85245
YJL062W-A	1	-1.03492
YJL066C	1	0.689608
YJL068C	1	3.17991
YJL069C	1	1.76676
YJL074C	1	-1.35821
YJL077C	1	-0.138608
YJL080C	1.19116	none
YJL081C	1	1.16838
YJL085W	1	4.10483
YJL089W	1	0.0439227
YJL095W	1	3.06773
YJL098W	1.54859	none
YJL100W	1	-3.16668
YJL102W	1	0.119269
YJL103C	1	2.50716
YJL106W	1	-2.15813
YJL107C,YJL108C	1	1.39436
YJL115W	2.37174	none
YJL116C	1	5.73237
YJL122W	1	1.958
YJL123C	1.59121	none
YJL125C	1.70232	none
YJL129C	1.071	none
YJL133C-A	1	0.649305
YJL134W,YJL135W	1	2.65042
YJL137C	1	-1.12478
YJL138C	1	0.157755
YJL141C,YJL142C	1	-0.159782
YJL144W	1	0.631861
YJL148W	1	1.62839
YJL151C	1	-2.16069
YJL155C	1	1.20674
YJL159W	1.85156	none
YJL163C	1	2.58201
YJL164C	1	1.82317
YJL166W	1	0.559967
YJL167W	1.78798	none
YJL170C	1	0.190256
YJL172W	1.34987	none
YJL177W	2.09522	none
YJL180C	2.93928	none
YJL190C	1.585	none
YJL191W	1	0.746535
YJL196C	1	1.12383
YJL199C	1	1.74077
YJL200C	2.48613	none
YJL202C	1	1.21313
YJL203W	1.00169	none
YJL205C	1	0.449551
YJL207C	1.03347	none
YJL210W	1	1.75894
YJL212C	1	3.76766
YJL218W	1.92004	none
YJR008W	1	0.434533
YJR010W	1	0.588359
YJR014W	1.63059	none
YJR016C	1	4.42683
YJR027W	1	0.113967
YJR029W	1	1.7233
YJR032W	1.18296	none
YJR038C	1	1.73657
YJR039W	1	-1.84197
YJR040W	1	2.03244
YJR042W	1.84287	none
YJR045C	1	-0.217315
YJR046W	1	1.09444
YJR052W	1	-0.776094
YJR053W	1	0.462531
YJR056C	1.60928	none
YJR058C	1	0.386869
YJR059W	1	0.798009
YJR060W	1	1.06873
YJR061W	4.03294	none
YJR067C	1.03243	none
YJR069C	1	4.49286
YJR070C	1.242	none
YJR072C	1.11972	none
YJR073C	1	1.57808
YJR074W	1	3.41258
YJR077C	1	1.44143
YJR078W,YJR079W	1.36003	none
YJR082C	1	1.7525
YJR084W	1.77843	none
YJR085C	1	-0.218988
YJR086W,YJR087W	1	-0.688056
YJR091C	1	0.40952
YJR096W	1	0.736512
YJR097W	1	1.3541
YJR099W	1	2.14128
YJR100C	1	-1.07181
YJR104C	1	0.961829
YJR105W	1	0.00915777
YJR110W	1	2.36106
YJR111C	1	0.830433
YJR113C	1	1.11501
YJR114W	1	1.78536
YJR115W	1	1.21617
YJR116W	1	-0.144669
YJR118C	1.18255	none
YJR119C	1	-0.01066
YJR121W	1	1.21094
YJR123W	1.49027	none
YJR127C	1	0.0131453
YJR134C	1.42235	none
YJR140C	1.1689	none
YJR143C	1.14883	none
YJR145C	1.10733	none
YJR146W,YJR147W	2.75381	none
YJR152W	1.452	none
YJR155W	1	1.47562
YKL002W	1	0.316788
YKL003C	1	2.44588
YKL004W	1	-0.120097
YKL005C	1	0.651551
YKL006W	1	8.80218
YKL009W	2.08555	none
YKL014C	1.32852	none
YKL015W	1	3.32614
YKL016C	1	-3.10089
YKL021C	1	-3.25623
YKL023W	1	2.45722
YKL026C	1	1.06096
YKL029C	1	0.940443
YKL032C	1	0.830778
YKL034W	1.43732	none
YKL035W	1	2.49511
YKL036C	1	0.138358
YKL038W	1	1.26646
YKL043W	1	-3.58271
YKL044W	1	-1.9433
YKL048C	1	1.46473
YKL049C	1	3.80812
YKL052C	1	0.626476
YKL053C-A	1	-0.300888
YKL053W	1	2.17265
YKL054C	1.57355	none
YKL055C	1	1.75071
YKL056C	4.90033	none
YKL057C	1	2.88084
YKL058W	1	1.43104
YKL059C	1	0.287613
YKL060C	1	-1.11928
YKL061W	1.11104	none
YKL065C	1	-0.829543
YKL065W-A	1	3.75197
YKL066W	1	2.19469
YKL067W	1	0.656033
YKL068W	1	0.1937
YKL068W-A	1	2.21219
YKL069W	1	4.38388
YKL070W	1	2.18152
YKL074C	1	4.1368
YKL078W	2.53541	none
YKL080W	1.72181	none
YKL082C	1	-2.44269
YKL084W	1	3.90708
YKL085W	1	-0.392031
YKL087C	1	-1.76192
YKL090W	1	1.52158
YKL091C	1	0.933444
YKL093W	1	1.78662
YKL094W	1	2.82639
YKL095W	1.09987	none
YKL096W	1	0.326092
YKL096W-A	1	-1.4604
YKL102C	1.81942	none
YKL109W	1	1.43806
YKL112W	1	5.19337
YKL113C	1	6.91175
YKL114C	1	1.37493
YKL117W	3.7282	none
YKL122C	1.85134	none
YKL125W	2.5299	none
YKL135C	1.03814	none
YKL141W	1	-1.84145
YKL142W	1	-2.22641
YKL143W	1.54561	none
YKL145W	2.19788	none
YKL146W	1	-0.295219
YKL147C	1	-0.58107
YKL148C	1	0.179803
YKL150W	1	-6.33332
YKL151C	1	0.488052
YKL152C	1	0.859286
YKL153W	1	0.169176
YKL155C	1	1.29473
YKL156C-A	1	-0.455558
YKL159C	1	0.360529
YKL164C	4.948	none
YKL171W	1	1.97983
YKL172W	1	2.17743
YKL173W	1	3.49269
YKL175W	1	0.673181
YKL177W	1	-0.52841
YKL182W	1.1031	none
YKL184W	1.93363	none
YKL185W	1.86747	none
YKL186C	1	0.113328
YKL187C	1	0.446449
YKL190W	1	-0.109592
YKL192C	1	1.2091
YKL195W	1	-1.81996
YKL196C	1.8689	none
YKL198C	1	1.73533
YKL201C	1	3.26511
YKL202W	1	5.34857
YKL203C	1.02996	none
YKL210W	1.59563	none
YKL212W	1.25781	none
YKL217W	1	1.47605
YKL218C	1.49279	none
YKL220C	1.44602	none
YKL221W	1	0.0921775
YKR002W	1	1.14503
YKR007W	1	0.0456591
YKR009C	1	1.47485
YKR010C	1.85853	none
YKR014C	1	-0.484266
YKR016W	1	2.29382
YKR019C	1	1.40106
YKR023W	1.0094	none
YKR025W	1.13904	none
YKR026C	1	6.25764
YKR027W	4.64988	none
YKR028W	1	2.95061
YKR034W	1	1.2603
YKR038C	1	-0.854614
YKR039W	9.10997	none
YKR041W	1.35956	none
YKR042W	1	-0.367552
YKR046C	1.57727	none
YKR047W	1	-2.33139
YKR049C	1	-0.241606
YKR052C	1.07798	none
YKR055W	1.52362	none
YKR058W	1	1.97619
YKR059W	1.36136	none
YKR060W	1.43222	none
YKR061W	1	1.623
YKR063C	1.01051	none
YKR064W	1.34619	none
YKR066C	1	0.410148
YKR069W	1	1.38665
YKR071C	1	2.15942
YKR072C	1	1.5004
YKR075C	1.58948	none
YKR075W-A	2.06201	none
YKR080W	1	1.3609
YKR082W	2.20675	none
YKR085C	1	1.3424
YKR086W	1.59963	none
YKR089C	1	0.913804
YKR091W	2.11929	none
YKR094C	1	0.958419
YKR096W	1	-1.52579
YKR097W	3.9039	none
YKR098C	1	2.91898
YKR100C	1.49168	none
YKR102W	1	0.597246
YLL004W	1.84332	none
YLL005C	1.61847	none
YLL008W	1	-1.63087
YLL009C	1	1.18788
YLL010C	1	1.58526
YLL011W	1	1.2844
YLL014W	1	-0.253631
YLL015W	1.0164	none
YLL018C	1.47123	none
YLL018C-A	1.02716	none
YLL019C,YLL020C	1	1.31581
YLL021W	1	1.08819
YLL023C	1	1.52159
YLL024C	1	1.47309
YLL025W	1	-3.07047
YLL026W	1	0.0801443
YLL027W	1	-0.232963
YLL029W	1	0.631067
YLL030C	1.16143	none
YLL034C	1.3638	none
YLL036C	1	0.00557889
YLL039C	1	-0.120048
YLL040C	1.4732	none
YLL041C	1	0.544038
YLL043W	1	1.14412
YLL044W	1.16074	none
YLL045C	1.49934	none
YLL048C	1.89186	none
YLL049W	1	-0.0693134
YLL055W	1	3.6576
YLL056C	1	1.9755
YLL058W	1	2.68458
YLR001C	1	1.39176
YLR005W	1	-10.5658
YLR007W	1	-1.51018
YLR011W	1.16221	none
YLR012C	1	-2.50507
YLR019W	1	0.201367
YLR023C	1	1.48926
YLR025W	1.04653	none
YLR029C	2.25921	none
YLR030W	1	2.04532
YLR037C	1.27377	none
YLR038C	1	-0.239188
YLR039C	1.20492	none
YLR045C	1	1.97359
YLR048W	1	1.41955
YLR051C	1	4.77489
YLR053C	1	-6.48492
YLR055C	1	-0.982018
YLR058C	1	0.825205
YLR060W	1.59666	none
YLR066W	1.50652	none
YLR067C	1.63745	none
YLR069C	1.15741	none
YLR075W	1	2.58367
YLR076C	1	1.87498
YLR083C	1	2.11497
YLR086W	1.17352	none
YLR088W	1.13654	none
YLR090W	1	-0.920687
YLR092W	1.00819	none
YLR093C	1	0.916426
YLR094C	1	1.79814
YLR101C	2.29752	none
YLR107W	1.42391	none
YLR108C	1.00899	none
YLR109W	1	0.832166
YLR110C	1.14093	none
YLR114C	1.50094	none
YLR120C	1	2.68181
YLR120W-A	1	2.81288
YLR125W	1.60167	none
YLR126C	1	-0.50891
YLR129W	1.0945	none
YLR130C	1.0882	none
YLR142W	1	-3.68491
YLR149C	1	0.423563
YLR150W	1.35294	none
YLR152C	1	2.41795
YLR153C	1.50862	none
YLR154W-E	1	0.955499
YLR154W-F	1	1.24569
YLR162W	1	1.45746
YLR164W	1	3.80182
YLR168C	1	2.4539
YLR175W	1.52564	none
YLR176C	1	1.02768
YLR177W	1	1.00018
YLR178C	1	0.494739
YLR181C	1	5.24141
YLR182W	1	1.95258
YLR185W	1	1.97371
YLR189C	1	1.15959
YLR193C	1	3.60964
YLR194C	1	2.70206
YLR195C	1	3.89897
YLR196W	1.02817	none
YLR197W	1.10056	none
YLR199C	1.71671	none
YLR200W	1.67947	none
YLR201C,YLR202C,YLR203C	1	-0.182831
YLR205C	1.19268	none
YLR206W	1	-1.25036
YLR208W	1	4.7118
YLR209C	1.55138	none
YLR211C	1	2.03627
YLR216C	1	1.18081
YLR217W	1	1.29903
YLR219W	1	1.78176
YLR222C	1	7.23856
YLR224W	1	1.31079
YLR225C	1	-1.5584
YLR232W	2.00221	none
YLR233C	2.22611	none
YLR243W	1.12061	none
YLR245C	1	-4.32341
YLR246W	1	0.894405
YLR248W	1	0.787866
YLR249W	1.47556	none
YLR250W	1	1.22074
YLR251W,YLR252W	1	2.58686
YLR254C	1	-0.603793
YLR256W	1	2.28851
YLR257W	1.10075	none
YLR258W	1	1.10708
YLR259C	1	0.393905
YLR262C-A	1	0.672741
YLR266C	1	1.51298
YLR267W	1	2.2463
YLR270W	1	0.140038
YLR276C	1.36956	none
YLR277C	1.45511	none
YLR284C	1	6.28172
YLR290C	1	-1.67453
YLR294C,YLR295C	1	0.789455
YLR297W	1	1.03748
YLR298C	1	-2.17242
YLR300W	3.74247	none
YLR301W	1	0.76157
YLR303W	1	0.0601047
YLR304C	1	0.291368
YLR305C	2.15739	none
YLR311C	1.37942	none
YLR312C	1	2.44334
YLR315W	1.91001	none
YLR316C	2.22907	none
YLR317W	4.67723	none
YLR319C	1	2.79055
YLR325C	1	-3.0923
YLR326W	1	-0.196821
YLR328W	1	5.7208
YLR330W	1	1.37467
YLR332W	1	1.02807
YLR333C	1	2.70779
YLR334C	1.2581	none
YLR337C	1	-0.407511
YLR342W	1.35475	none
YLR343W	1	1.9154
YLR344W	1	0.266916
YLR345W	1	0.136384
YLR349W	1	2.0018
YLR350W	1	-0.333809
YLR352W	2.16264	none
YLR356W	1	1.01884
YLR357W	1	-0.799415
YLR358C	1	-0.78453
YLR359W	1	3.14893
YLR361C-A	1	0.0184074
YLR367W	1.32639	none
YLR373C	1.18797	none
YLR381W	1.24134	none
YLR383W	1	4.38334
YLR384C	1	4.86724
YLR390W-A	1	0.169579
YLR395C	1	1.82597
YLR396C	1.04713	none
YLR397C	1.3978	none
YLR399C	1	-0.459612
YLR399W-A	1	-1.34335
YLR402W	1.37619	none
YLR403W	1	6.18771
YLR405W	1	3.81094
YLR406C	1.28745	none
YLR407W	1	0.77242
YLR418C	1.15729	none
YLR419W	1	1.76221
YLR420W	1	4.06969
YLR421C	1	-7.41118
YLR423C	1	2.69137
YLR424W	1	0.558673
YLR427W	2.69882	none
YLR432W	1	4.94985
YLR435W	1.28981	none
YLR436C	1	0.39901
YLR437C	1	0.613937
YLR437C-A	1	0.0824575
YLR438W	1	0.493575
YLR441C	1	6.80166
YLR442C	1.19786	none
YLR448W	1	2.66084
YLR449W	1.08051	none
YLR451W	1.33928	none
YLR455W	1	3.52632
YML002W	1	1.1466
YML003W	1	2.34013
YML004C	1	1.31152
YML007W	1	-2.16485
YML008C	1.31904	none
YML009C	1	1.69677
YML012C-A	1.46474	none
YML014W	2.14141	none
YML015C	1.24515	none
YML016C	2.71878	none
YML019W	1.31154	none
YML024W	1	3.1135
YML025C	1	-2.50297
YML026C	1.04019	none
YML032C	1.45041	none
YML034C-A	1	-0.0186309
YML034W	1	0.654227
YML042W	1	-0.765793
YML043C	1	-0.563756
YML047C	1	0.0814733
YML048W	1.27459	none
YML049C	1.33315	none
YML051W	1	-0.086966
YML052W	1	-0.0359969
YML053C	1	3.79846
YML054C	1	2.03778
YML058W	1	0.280167
YML062C	1	2.77903
YML063W	1.23896	none
YML065W	1	1.84466
YML069W	1	0.744639
YML070W	1	1.47621
YML072C	1.23828	none
YML073C	1	3.35483
YML074C	1.63792	none
YML075C	1.40434	none
YML080W	1	1.00883
YML081C-A	1	1.27721
YML086C	1.22692	none
YML089C	1	2.00156
YML090W	1.19504	none
YML091C	1	2.67494
YML092C	1.36033	none
YML093W	1	2.31174
YML096W	1.49839	none
YML097C	1	1.01116
YML099C	1.23047	none
YML100W	1	1.00422
YML101C	1	1.68777
YML101C-A	1	-3.6926
YML103C	2.5682	none
YML112W	1	-1.08827
YML114C	2.15193	none
YML120C	1	0.0424607
YML122C	1	2.42281
YML123C	1.84751	none
YML125C	1.34848	none
YML126C	1.8297	none
YML127W	1	1.50485
YML128C	1	0.250468
YML129C	1	-0.0710855
YML130C	1	0.0565361
YML131W	1	5.72373
YMR002W	1	-0.0235735
YMR003W	1	1.05837
YMR011W	1	5.5843
YMR012W	1.1824	none
YMR014W	1	3.70554
YMR015C	1.84315	none
YMR016C	1	0.917088
YMR020W	1.37675	none
YMR021C	1	0.761999
YMR022W	1	-2.01745
YMR026C	2.05944	none
YMR027W	1	-4.02982
YMR030W	1	1.48412
YMR031C	1	-0.166562
YMR034C	1.61704	none
YMR036C	1	1.45382
YMR037C	1	0.947777
YMR038C	1.20622	none
YMR039C	1	1.89072
YMR040W	1.10272	none
YMR041C	1	0.625003
YMR042W	1	1.50837
YMR043W	1	1.95299
YMR044W	1	2.30432
YMR045C	1	-0.579088
YMR049C	1	2.31285
YMR052W	1.6275	none
YMR056C	1.13352	none
YMR062C	1	-1.35817
YMR066W	1	-1.51378
YMR069W	1	-1.94847
YMR070W	1	0.5079
YMR073C	1	-0.995788
YMR076C	2.46504	none
YMR079W	1.21875	none
YMR081C	1	0.422232
YMR083W	1	-0.220672
YMR084W	1.03022	none
YMR085W	1	2.86058
YMR088C	1.16889	none
YMR090W	1	4.46468
YMR092C	1.15158	none
YMR093W	1	3.68476
YMR099C	1.84791	none
YMR102C	1	0.895831
YMR103C	1	-0.524682
YMR104C	1	0.046483
YMR105C	1	2.84139
YMR107W	1	0.498179
YMR108W	1	-0.219575
YMR109W	1	0.688587
YMR114C	1	-1.65145
YMR118C	1	0.605419
YMR121C	1.10982	none
YMR124W	1	3.71792
YMR128W	1	1.59523
YMR130W	1	2.23109
YMR131C	1.19642	none
YMR133W	1	-0.0528915
YMR134W	2.33964	none
YMR135C	1	0.677222
YMR140W	1	0.75809
YMR141C	1	0.133661
YMR142C	1.19887	none
YMR143W	1.16686	none
YMR159C	1	1.9185
YMR161W	1	1.50085
YMR165C	1	-1.00766
YMR168C	1	-1.72477
YMR169C	1	1.63979
YMR171C	1	0.325275
YMR172C-A	1	0.0731034
YMR173W,YMR173W-A	1.13596	none
YMR174C	1	-1.40778
YMR175W	1	-0.217773
YMR181C	1	0.343043
YMR182C	1	1.54013
YMR184W	1	1.04765
YMR185W	1	3.45135
YMR186W	1	0.71782
YMR188C	1	0.512244
YMR193C-A	1	2.49035
YMR194C-A	1.17394	none
YMR194C-B	1	3.78593
YMR195W	1.05428	none
YMR196W	1	-0.0909759
YMR201C	1	-0.311286
YMR202W	2.18691	none
YMR205C	1	2.50433
YMR206W	1	0.00827929
YMR208W	1.5345	none
YMR212C	1.5863	none
YMR214W	1	1.42002
YMR215W	1	1.28752
YMR216C	1	0.429315
YMR217W	1.68836	none
YMR218C	1	2.70642
YMR219W	1.10464	none
YMR227C	1.04364	none
YMR228W	1	2.80688
YMR229C	1	3.31704
YMR235C	1.21036	none
YMR238W	1.15885	none
YMR240C	1	2.85926
YMR242C	1.0208	none
YMR243C	1	0.298773
YMR245W	1.6515	none
YMR251W	1.21184	none
YMR252C	1	0.597452
YMR253C	1	0.918669
YMR254C	1	0.346948
YMR255W	1	0.013218
YMR256C	1	0.556761
YMR260C	1.45755	none
YMR263W	1.16487	none
YMR266W	1	3.50331
YMR267W	1.30705	none
YMR271C	1	3.22406
YMR272C	1	1.2323
YMR272W-A	1	0.473017
YMR273C	1.55878	none
YMR274C	1.2345	none
YMR276W	3.06904	none
YMR280C	1	2.52
YMR281W	1	2.76482
YMR286W	1	-0.14966
YMR288W	1.05413	none
YMR290W-A	1.68302	none
YMR291W	1	4.76387
YMR295C	1	-0.129499
YMR297W	1	-0.486075
YMR298W	1	0.507065
YMR302C	1	-0.0340592
YMR304C-A,YMR305C	1.41812	none
YMR304W	2.81254	none
YMR307W	1	2.44371
YMR309C	1	2.98833
YMR311C	1	-0.0984733
YMR313C	1	1.33078
YMR314W	1	-0.245701
YMR315W	1	0.346204
YMR316C-A	1.19329	none
YMR316W	1.07155	none
YMR317W	1	-0.0232844
YMR320W	1	0.636113
YMR323W	1	1.69114
YNL001W	1	0.916803
YNL005C	1	0.863004
YNL006W	1	1.73515
YNL007C	1	0.999486
YNL009W	1	0.223728
YNL011C	1	0.206854
YNL012W	1	2.18285
YNL014W	1	1.67847
YNL015W	1	-0.457457
YNL024C-A	1.09173	none
YNL034W	1	0.608039
YNL036W	1	0.160844
YNL037C	1	2.61268
YNL042W	1	2.5531
YNL042W-B	1	3.63986
YNL044W	1	0.652785
YNL046W	1	-2.02861
YNL049C	1.34217	none
YNL050C	1.6015	none
YNL052W	1	0.249722
YNL055C	1	0.433954
YNL059C	1.11726	none
YNL061W	1.30443	none
YNL063W	1	2.51728
YNL064C	1	1.44885
YNL067W	1	-0.732549
YNL069C	1	0.883841
YNL074C	1	-0.559649
YNL076W	1	1.21832
YNL077W	1	1.56484
YNL079C	1	-2.30955
YNL080C	1	1.67842
YNL081C	1	1.06339
YNL085W	1.08582	none
YNL087W	1	3.6746
YNL091W	1.37882	none
YNL093W	1.79292	none
YNL097C	1	-1.19199
YNL097W-A	1	-2.95313
YNL098C	1	1.78976
YNL099C	1	1.884
YNL100W	1	1.14946
YNL101W	1	-1.34549
YNL103W	1	0.738333
YNL110C	1	2.16719
YNL112W	1.51316	none
YNL115C	1.35663	none
YNL116W	1	0.212914
YNL117W	1	0.404831
YNL119W	1.69791	none
YNL121C	1.05107	none
YNL123W	1	2.56328
YNL124W	1.0774	none
YNL125C	1	0.433227
YNL129W	1.02024	none
YNL130C	1.43764	none
YNL133C	1	1.76958
YNL134C	1.58611	none
YNL137C	2.30013	none
YNL141W	1	1.42737
YNL143C	1	0.491096
YNL144C	1	1.71946
YNL146C-A	1	1.07557
YNL147W	1	0.77842
YNL153C	2.62646	none
YNL155W	1	-4.45774
YNL156C	1.16618	none
YNL158W	1	0.0666289
YNL159C	1	0.777763
YNL160W	1.70936	none
YNL162W	1.32642	none
YNL163C	3.01364	none
YNL174W	1.18036	none
YNL175C	1	2.7508
YNL178W	1	3.96342
YNL180C	1	0.206976
YNL181W	1.20611	none
YNL183C	1	-3.61475
YNL189W	1.41529	none
YNL190W	1	-0.968959
YNL191W	1	1.83892
YNL192W	1	-0.349271
YNL193W	1	2.51694
YNL194C	1	0.87131
YNL195C	1	-0.0548055
YNL196C	1.44882	none
YNL197C	1	0.736747
YNL198C,YNL199C	1	3.23139
YNL200C	1	1.69937
YNL202W	1	2.46442
YNL209W	1.22619	none
YNL219C	1.34018	none
YNL222W	1.721	none
YNL225C	1	1.4841
YNL236W	1.53184	none
YNL240C	1	1.18399
YNL241C	1	0.961915
YNL244C	1	-0.120827
YNL246W	1	2.67032
YNL247W	1.56074	none
YNL248C	1.25525	none
YNL250W	1.50184	none
YNL255C	1.69333	none
YNL259C	1.99261	none
YNL260C	1	-0.466878
YNL261W	2.38435	none
YNL262W	4.06559	none
YNL263C	2.03198	none
YNL265C	1.08371	none
YNL267W	1.40702	none
YNL268W	1.75539	none
YNL269W	1	-1.0475
YNL270C	1	-2.85207
YNL272C	1	1.79806
YNL276C	1	1.47795
YNL277W	1	0.855193
YNL284C	1	0.881268
YNL284C-B	1	-0.150782
YNL285W	1	3.98115
YNL286W	1	4.78031
YNL289W	1.66681	none
[truncated: 492 more rows]
