# Supplementary material for: Independent manipulation of histone H3 modifications in individual nucleosomes reveals the contributions of sister histones to transcription
Source: eLife. 2017 Oct 13;6:e30178. doi: 10.7554/eLife.30178 (PMC5677365; doi:10.7554/eLife.30178)
Supplement: Figure 8—source data 4. [file elife-30178-fig8-data4.xlsx]

## Sheet: Sheet1
II	III	I
YDR119W-A	YGR055W	YNL183C
YMR036C	YNL246W	YOR099W
YFR017C	YJR074W	YCL025C
YMR314W	YMR169C	YKL150W
YHR033W	YKL053W	YNL155W
YIL055C	YPL250C	YDR261C-D
YIL046W	YLR267W	YMR027W
YHR139C	YJL134W,YJL135W	YDR403W
YOL084W	YDL181W	YPR065W
YJL138C	YPR008W	YDR218C
YNL014W	YMR194C-B	YFL021W
YOR028C	YDR096W	YLR007W
YDR463W	YDR012W	YOR008C
YIL160C	YIL045W	YKL016C
YBR222C	YPL201C	YPR037C
YKL032C	YDL129W	YGR282C
YNL322C	YER028C	YKL043W
YKL052C	YDR197W	YBR290W
YKR066C	YNL193W	YCL017C
YNL276C	YER088C	YGL198W
YBL033C	YGL027C	YPR007C
YMR252C	YJL095W	YDR150W
YBR071W	YGR210C
YER133W	YPL217C
YMR315W	YKL035W
YDR256C	YJR114W
YBL001C	YGR101W
YGL259W	YKL217W
YLR149C	YHR129C
YMR254C	YGL062W
YGR046W	YKL201C
YPR151C	YBR079C
YBL049W	YFR030W
YNL305C	YCR035C
YDR186C	YLR455W
YBL064C	YLR164W
YGL205W	YML003W
YML034W	YCR023C
YKL065C	YLL056C
YCR004C	YPR163C
YIL101C	YBL087C
YBR230C	YPR030W
YDL159W	YOL148C
YDL046W	YOL100W
YNL067W	YPL093W
YNL133C	YDR536W
YOL060C	YIL150C
YLL009C	YLR448W
YKL002W	YDR034C
YDR231C	YJL085W
YHL008C	YPL086C
YPL054W	YMR307W
YLR224W	YOR361C
YNL241C	YDL161W
YIL105C	YML093W
YNL195C	YKL094W
YMR041C	YDR091C
YPL223C	YOR040W
YKL070W	YKL065W-A
YGL002W	YDR440W
YGL229C	YMR266W
YOL136C	YNL178W
YBR214W	YKL202W
YBL050W	YDR299W
YOL059W	YMR240C
YDL079C	YMR105C
YPL017C	YGL050W
YKL198C	YJL148W
YNL081C	YDR062W
YMR175W	YPL103C
YMR181C	YGR051C
YPR124W	YDR354W
YLR301W	YKL049C
YLR189C	YDR275W
YDL123W	YPL186C
YNL116W	YNL302C
YFR033C	YDR395W
YNL125C	YGL151W
YGL125W	YOL131W
YNL240C	YMR271C
YBR016W	YPL231W
YKL156C-A	YDL002C
YJR027W	YOL099C
YEL024W	YLR181C
YGR241C	YHL013C
YLL027W	YGR285C
YOR294W	YBR181C
YOR092W	YPR027C
YIL118W	YOL085W-A
YDR530C	YGR201C
YLR399C	YOL077C
YLR177W	YPL079W
YNL055C	YKL172W
YBL076C	YML054C
YGL187C	YDL116W
YGR067C	YBR245C
YCR012W	YPL005W
YGR037C	YER027C
YMR070W	YHR170W
YPR125W	YJL116C
YOR173W	YOR051C
YMR037C	YDR398W
YBL029C-A	YKR028W
YER146W	YBR251W
YGR088W	YJL019W
YKR049C	YJL163C
YOR180C	YNR019W
YGL098W	YML073C
YKR089C	YDR429C
YKL221W	YDL157C
YJR110W	YDR247W
YBR002C	YJL050W
YPR191W	YBR116C,YBR117C
YBR049C	YMR280C
YLR219W	YML062C
YOR273C	YER043C
YKL096W	YER072W
YGR050C	YLR432W
YGR132C	YGR169C-A
YLR407W	YDR216W
YJL205C	YMR130W
YMR302C	YCR052W
YOL110W	YOL020W
YGR102C	YMR229C
YML127W	YKL113C
YGL163C	YDL026W
YFL054C	YNL087W
YNR071C	YBR072W
YER116C	YGR023W
YHR016C	YPR021C
YMR206W	YBR171W
YDR272W	YPL218W
YNL074C	YCL045C
YMR118C	YGR162W
YNL005C	YJR099W
YNL001W	YAL061W
YLL021W	YPL043W
YKL151C	YPL151C
YPL225W	YGR021W
YHR104W	YMR090W
YPR002W	YJL052W
YGL010W	YMR291W
YGL120C	YDL040C
YOR237W	YEL026W
YML120C	YPL070W
YDR329C	YLR359W
YJR113C	YGR078C
YBR147W	YOR206W
YHR031C	YHR136C
YJL055W	YDL121C
YLR345W	YDR334W
YIL135C	YDR209C
YGL192W	YBL024W
YDR513W	YIL093C
YOR121C	YKL057C
YPL234C	YER186C
YLL041C	YCR053W
YJL155C	YBR154C
YIL047C,YIL047C-A
YDR516C
YPL203W
YOL026C
YPL132W
YGL058W
YGL218W
YOR147W
YNL037C
YDR088C
YDL001W
YDL133W
YKL091C
YDR508C
YNL009W
YPR113W
YCL026C-A
YJR091C
YKL152C
YOL119C
YER156C
YGR030C
YBL048W
YKL053C-A
YDR173C
YKL146W
YGL256W
YKL109W
YDR133C
YBR039W
YLR390W-A
YML002W
YCR082W
