# Supplementary material for: Independent manipulation of histone H3 modifications in individual nucleosomes reveals the contributions of sister histones to transcription
Source: eLife. 2017 Oct 13;6:e30178. doi: 10.7554/eLife.30178 (PMC5677365; doi:10.7554/eLife.30178)
Supplement: Figure 8—source data 5. [file elife-30178-fig8-data5.xlsx]

## Sheet: H3DK4R H3HK4R ∩ set1KO
Category	Term	Count	%	PValue	Genes
KEGG_PATHWAY	sce01100:Metabolic pathways	114	18.7192	4.54825e-13	YER091C, YOL058W, YGR043C, YMR313C, YJL166W, YIL094C, YDR191W, YDR408C, YJR016C, YHR051W, YNL262W, YLR058C, YAL054C, YOR025W, YCL064C, YMR169C, YLR359W, YER023W, YPL061W, YEL002C, YGL184C, YIL053W, YGR202C, YPR026W, YMR271C, YPL028W, YGR019W, YPL258C, YOR074C, YHR007C, YGR175C, YIL099W, YPR062W, YNL141W, YDL067C, YLR432W, YDR035W, YGL253W, YKR069W, YNL037C, YMR202W, YDR226W, YHR216W, YER065C, YPL…
KEGG_PATHWAY	sce01110:Biosynthesis of secondary metabolites	62	10.1806	2.36008e-10	YOL058W, YER091C, YGR043C, YDL022W, YNL009W, YDR408C, YJR016C, YLR058C, YOL086C, YAL054C, YML075C, YLR153C, YNL117W, YHR018C, YCL064C, YMR169C, YLR359W, YER023W, YPL061W, YDR284C, YMR205C, YER086W, YGL184C, YDR516C, YER003C, YMR118C, YGR088W, YPL028W, YGR205W, YHR007C, YGR175C, YLR432W, YLR164W, YPR001W, YLL058W, YGL253W, YDR035W, YBR248C, YKR069W, YOR374W, YLR304C, YNL037C, YDR178W, YDR226W, YMR…
KEGG_PATHWAY	sce01130:Biosynthesis of antibiotics	50	8.21018	1.24431e-09	YOL058W, YGR043C, YPR001W, YLR164W, YLL058W, YGL253W, YIL094C, YDR035W, YDL131W, YNL009W, YDR408C, YOR374W, YLR304C, YJR016C, YLR058C, YNL037C, YDR178W, YMR202W, YGR208W, YOL086C, YAL054C, YDR226W, YMR105C, YCL064C, YLR153C, YML075C, YHR018C, YFL018C, YMR062C, YLR359W, YER023W, YPL061W, YMR205C, YER086W, YDR516C, YJL167W, YKR097W, YIL125W, YPL262W, YMR118C, YLR438W, YGR088W, YPL028W, YGR205W, YML…
KEGG_PATHWAY	sce01200:Carbon metabolism	30	4.92611	2.85278e-07	YGR043C, YPR001W, YLR164W, YGL253W, YNL009W, YLR304C, YLR058C, YNL037C, YGR208W, YDR178W, YAL054C, YNL117W, YLR153C, YCL064C, YFL018C, YKL029C, YMR205C, YER065C, YER086W, YDR516C, YGL062W, YKR097W, YIL125W, YPL262W, YMR118C, YGR088W, YGR205W, YPL028W, YGL125W, YDR019C
KEGG_PATHWAY	sce00020:Citrate cycle (TCA cycle)	12	1.97044	9.63678e-05	YMR118C, YNL037C, YDR178W, YPR001W, YLR164W, YGL062W, YFL018C, YNL009W, YKR097W, YPL262W, YLR304C, YIL125W
KEGG_PATHWAY	sce00620:Pyruvate metabolism	13	2.13465	0.000156568	YKL029C, YPL061W, YPL028W, YAL054C, YNL117W, YLR153C, YBL015W, YGL062W, YFL018C, YDL131W, YKR097W, YOR374W, YPL262W
KEGG_PATHWAY	sce01230:Biosynthesis of amino acids	25	4.10509	0.000358632	YOL058W, YER091C, YER023W, YMR205C, YGR043C, YER086W, YPR001W, YGL184C, YLL058W, YIL094C, YDR035W, YGL062W, YBR248C, YNL009W, YDL131W, YLR304C, YJR016C, YER055C, YLR058C, YNL037C, YGR208W, YHR018C, YCL064C, YMR062C, YDR127W
KEGG_PATHWAY	sce00630:Glyoxylate and dicarboxylate metabolism	10	1.64204	0.000402298	YLR058C, YGR088W, YER065C, YGR205W, YPL028W, YPR001W, YNL117W, YFL018C, YDR019C, YLR304C
KEGG_PATHWAY	sce00500:Starch and sucrose metabolism	11	1.80624	0.00325382	YIL162W, YBR126C, YGR282C, YDR001C, YDR516C, YGL253W, YMR105C, YPR026W, YLR300W, YLR258W, YIL099W
KEGG_PATHWAY	sce00650:Butanoate metabolism	6	0.985222	0.00508701	YJR155W, YPL028W, YGR019W, YML126C, YDL243C, YAL061W
KEGG_PATHWAY	sce00280:Valine, leucine and isoleucine degradation	6	0.985222	0.00508701	YPL061W, YPL028W, YGR019W, YML126C, YFL018C, YOR374W
KEGG_PATHWAY	sce00670:One carbon pool by folate	6	0.985222	0.0101294	YLR058C, YKR080W, YGL125W, YOR074C, YDR408C, YDR019C
KEGG_PATHWAY	sce00051:Fructose and mannose metabolism	7	1.14943	0.0111118	YMR205C, YDR516C, YER003C, YOL136C, YGL253W, YDL055C, YJL155C
KEGG_PATHWAY	sce00330:Arginine and proline metabolism	7	1.14943	0.0111118	YER023W, YPR062W, YLR438W, YPL061W, YLR142W, YMR020W, YOR374W
KEGG_PATHWAY	sce00190:Oxidative phosphorylation	14	2.29885	0.0160664	YBR011C, YGR183C, YDL067C, YLR038C, YLR164W, YJL166W, YPR191W, YPL036W, YMR267W, YHR051W, YMR118C, YDR178W, YML081C-A, YDR529C
KEGG_PATHWAY	sce00380:Tryptophan metabolism	6	0.985222	0.017827	YGR088W, YJL060W, YPL061W, YPL028W, YIL125W, YOR374W
KEGG_PATHWAY	sce00010:Glycolysis / Gluconeogenesis	12	1.97044	0.0183643	YPL061W, YMR205C, YOL086C, YAL054C, YDR516C, YGL253W, YMR105C, YLR153C, YFL018C, YMR169C, YKR097W, YOR374W
KEGG_PATHWAY	sce00561:Glycerolipid metabolism	7	1.14943	0.0262834	YDR284C, YPL061W, YGR205W, YMR313C, YIL053W, YOR374W, YOR120W
KEGG_PATHWAY	sce00410:beta-Alanine metabolism	5	0.821018	0.02873	YPL061W, YGR019W, YMR169C, YMR020W, YOR374W
KEGG_PATHWAY	sce00340:Histidine metabolism	5	0.821018	0.02873	YER055C, YPL061W, YBR248C, YMR169C, YOR374W
KEGG_PATHWAY	sce01210:2-Oxocarboxylic acid metabolism	8	1.31363	0.042948	YJR016C, YNL037C, YPR001W, YIL094C, YMR062C, YDL131W, YNL009W, YLR304C

## Sheet: II∩set1ko
Category	Term	Count	%	PValue	Genes
KEGG_PATHWAY	sce01200:Carbon metabolism	6	11.1111	0.000319527	YMR118C, YGR088W, YNL037C, YDR516C, YGL125W, YNL009W
KEGG_PATHWAY	sce00051:Fructose and mannose metabolism	3	5.55556	0.00638906	YDR516C, YOL136C, YJL155C
KEGG_PATHWAY	sce00020:Citrate cycle (TCA cycle)	3	5.55556	0.0145453	YMR118C, YNL037C, YNL009W
KEGG_PATHWAY	sce01110:Biosynthesis of secondary metabolites	6	11.1111	0.022093	YMR118C, YGR088W, YBL033C, YNL037C, YDR516C, YNL009W
KEGG_PATHWAY	sce01130:Biosynthesis of antibiotics	5	9.25926	0.0335049	YMR118C, YGR088W, YNL037C, YDR516C, YNL009W

## Sheet: III∩set1ko
No pathway was specifically associated in this gene set with P<0.05

## Sheet: I∩set1ko
No pathway was specifically associated in this gene set with P<0.05
