# Supplementary material for: Independent manipulation of histone H3 modifications in individual nucleosomes reveals the contributions of sister histones to transcription
Source: eLife. 2017 Oct 13;6:e30178. doi: 10.7554/eLife.30178 (PMC5677365; doi:10.7554/eLife.30178)
Supplement: Supplementary file 1. [file elife-30178-supp1.xlsx]

## Sheet: Sheet1
Name	Genotype	Source
YPH500	MATa ura3-52 lys2-801_amber ade2-101_ochre trp1-Δ63 his3-Δ200 leu2-Δ1	(Sikorski and Hieter, 1989)
LHT001	YPH500 (hht1-hhf1)Δ::hisG (hht2-hhf2)Δ::hisG pRS316[CEN URA3 HHT1-HHF1]	Zhou lab
ZL01	YPH500 (hht1-hhf1)Δ::hisG (hht2-hhf2)Δ::hisG pRS314[CEN TRP1 pADE3-HHT1(L130H)] pRS315[CEN LEU2 HHT1(A110D)-HHF1]	This work
ZL02	YPH500 (hht1-hhf1)Δ::hisG (hht2-hhf2)Δ::hisG pRS314[CEN TRP1 pADE3-1×MYC-HHT1(L130H)] pRS315[CEN LEU2 HHT1(A110D)-HHF1]	This work
ZL03	YPH500 (hht1-hhf1)Δ::hisG (hht2-hhf2)Δ::hisG pRS314[CEN TRP1 pADE3-HHT1(L130H)] pRS315[CEN LEU2 1×MYC-HHT1(A110D)-HHF1]	This work
ZL04	YPH500 (hht1-hhf1)Δ::hisG (hht2-hhf2)Δ::hisG pRS314[CEN TRP1 pADE3-HHT1(K4R L130H)] pRS315[CEN LEU2 HHT1(A110D)-HHF1]	This work
ZL05	YPH500 (hht1-hhf1)Δ::hisG (hht2-hhf2)Δ::hisG pRS314[CEN TRP1 pADE3-HHT1(L130H)] pRS315[CEN LEU2 HHT1(K4R A110D)-HHF1]	This work
ZL06	YPH500 (hht1-hhf1)Δ::hisG (hht2-hhf2)Δ::hisG pRS314[CEN TRP1 pADE3-HHT1(K4R L130H)] pRS315[CEN LEU2 HHT1(K4R A110D)-HHF1]	This work
ZL07	YPH500 (hht1-hhf1)Δ::hisG (hht2-hhf2)Δ::hisG pRS314[CEN TRP1 pADE3-HHT1(K36R L130H)] pRS315[CEN LEU2 HHT1(A110D)-HHF1]	This work
ZL08	YPH500 (hht1-hhf1)Δ::hisG (hht2-hhf2)Δ::hisG pRS314[CEN TRP1 pADE3-HHT1(L130H)] pRS315[CEN LEU2 HHT1(K36R A110D)-HHF1]	This work
ZL09	YPH500 (hht1-hhf1)Δ::hisG (hht2-hhf2)Δ::hisG pRS314[CEN TRP1 pADE3-HHT1(K36R L130H)] pRS315[CEN LEU2 HHT1(K36R A110D)-HHF1]	This work
ZL10	YPH500 (hht1-hhf1)Δ::hisG (hht2-hhf2)Δ::hisG pRS314[CEN TRP1 pADE3-HHT1(K79R L130H)] pRS315[CEN LEU2 HHT1(A110D)-HHF1]	This work
ZL11	YPH500 (hht1-hhf1)Δ::hisG (hht2-hhf2)Δ::hisG pRS314[CEN TRP1 pADE3-HHT1(L130H)] pRS315[CEN LEU2 HHT1(K79R A110D)-HHF1]	This work
ZL12	YPH500 (hht1-hhf1)Δ::hisG (hht2-hhf2)Δ::hisG pRS314[CEN TRP1 pADE3-HHT1(K79R L130H)] pRS315[CEN LEU2 HHT1(K79R A110D)-HHF1]	This work
ZL13	YPH500 (hht1-hhf1)Δ::hisG (hht2-hhf2)Δ::hisG pRS314[CEN TRP1 pADE3-HHT1(Δ4-15 L130H)] pRS315[CEN LEU2 HHT1(A110D)-HHF1]	This work
ZL14	YPH500 (hht1-hhf1)Δ::hisG (hht2-hhf2)Δ::hisG pRS314[CEN TRP1 pADE3-HHT1(L130H)] pRS315[CEN LEU2 HHT1(Δ4-15 A110D)-HHF1]	This work
ZL15	YPH500 (hht1-hhf1)Δ::hisG (hht2-hhf2)Δ::hisG pRS314[CEN TRP1 pADE3-HHT1(Δ4-15 L130H)] pRS315[CEN LEU2 HHT1(Δ4-15 A110D)-HHF1]	This work
ZL16	YPH500 (hht1-hhf1)Δ::hisG (hht2-hhf2)Δ::hisG set1Δ::KanMX pRS314[CEN TRP1 pADE3-HHT1(L130H)] pRS315[CEN LEU2 HHT1(A110D)-HHF1]	This work
ZL17	YPH500 (hht1-hhf1)Δ::hisG (hht2-hhf2)Δ::hisG set1Δ::KanMX pRS314[CEN TRP1 pADE3-HHT1(K4R L130H)] pRS315[CEN LEU2 HHT1(A110D)-HHF1]	This work
ZL18	YPH500 (hht1-hhf1)Δ::hisG (hht2-hhf2)Δ::hisG set1Δ::KanMX pRS314[CEN TRP1 pADE3-HHT1(L130H)] pRS315[CEN LEU2 HHT1(K4R A110D)-HHF1]	This work
ZL19	YPH500 (hht1-hhf1)Δ::hisG (hht2-hhf2)Δ::hisG set1Δ::KanMX pRS314[CEN TRP1 pADE3-HHT1(K4R L130H)] pRS315[CEN LEU2 HHT1(K4R A110D)-HHF1]	This work
ZL20	YPH500 (hht1-hhf1)Δ::hisG (hht2-hhf2)Δ::hisG set2Δ::KanMX pRS314[CEN TRP1 pADE3-HHT1(L130H)] pRS315[CEN LEU2 HHT1(A110D)-HHF1]	This work
ZL21	YPH500 (hht1-hhf1)Δ::hisG (hht2-hhf2)Δ::hisG set2Δ::KanMX pRS314[CEN TRP1 pADE3-HHT1(K36R L130H)] pRS315[CEN LEU2 HHT1(A110D)-HHF1]	This work
ZL22	YPH500 (hht1-hhf1)Δ::hisG (hht2-hhf2)Δ::hisG set2Δ::KanMX pRS314[CEN TRP1 pADE3-HHT1(L130H)] pRS315[CEN LEU2 HHT1(K36R A110D)-HHF1]	This work
ZL23	YPH500 (hht1-hhf1)Δ::hisG (hht2-hhf2)Δ::hisG set2Δ::KanMX pRS314[CEN TRP1 pADE3-HHT1(K36R L130H)] pRS315[CEN LEU2 HHT1(K36R A110D)-HHF1]	This work
ZL24	YPH500 (hht1-hhf1)Δ::hisG (hht2-hhf2)Δ::hisG spp1Δ::HIS3 pRS314[CEN TRP1 pADE3-HHT1(L130H)] pRS315[CEN LEU2 HHT1(A110D)-HHF1]	This work
ZL25	YPH500 (hht1-hhf1)Δ::hisG (hht2-hhf2)Δ::hisG spp1Δ::HIS3 pRS314[CEN TRP1 pADE3-HHT1(K4R L130H)] pRS315[CEN LEU2 HHT1(A110D)-HHF1]	This work
ZL26	YPH500 (hht1-hhf1)Δ::hisG (hht2-hhf2)Δ::hisG spp1Δ::HIS3 pRS314[CEN TRP1 pADE3-HHT1(L130H)] pRS315[CEN LEU2 HHT1(K4R A110D)-HHF1]	This work
ZL27	YPH500 (hht1-hhf1)Δ::hisG (hht2-hhf2)Δ::hisG spp1Δ::HIS3 pRS314[CEN TRP1 pADE3-HHT1(K4R L130H)] pRS315[CEN LEU2 HHT1(K4R A110D)-HHF1]	This work
ZL28	YPH500 (hht1-hhf1)Δ::hisG (hht2-hhf2)Δ::hisG sdc1Δ::HIS3 pRS314[CEN TRP1 pADE3-HHT1(L130H)] pRS315[CEN LEU2 HHT1(A110D)-HHF1]	This work
ZL29	YPH500 (hht1-hhf1)Δ::hisG (hht2-hhf2)Δ::hisG sdc1Δ::HIS3 pRS314[CEN TRP1 pADE3-HHT1(K4R L130H)] pRS315[CEN LEU2 HHT1(A110D)-HHF1]	This work
ZL30	YPH500 (hht1-hhf1)Δ::hisG (hht2-hhf2)Δ::hisG sdc1Δ::HIS3 pRS314[CEN TRP1 pADE3-HHT1(L130H)] pRS315[CEN LEU2 HHT1(K4R A110D)-HHF1]	This work
ZL31	YPH500 (hht1-hhf1)Δ::hisG (hht2-hhf2)Δ::hisG sdc1Δ::HIS3 pRS314[CEN TRP1 pADE3-HHT1(K4R L130H)] pRS315[CEN LEU2 HHT1(K4R A110D)-HHF1]	This work
ZL32	YPH500 (hht1-hhf1)Δ::hisG (hht2-hhf2)Δ::hisG GAL4-13×MYC::HIS3 pRS314[CEN TRP1 pADE3-HHT1(L130H)] pRS315[CEN LEU2 HHT1(A110D)-HHF1]	This work
ZL33	YPH500 (hht1-hhf1)Δ::hisG (hht2-hhf2)Δ::hisG GAL4-13×MYC::HIS3 pRS314[CEN TRP1 pADE3-HHT1(K4R L130H)] pRS315[CEN LEU2 HHT1(A110D)-HHF1]	This work
ZL34	YPH500 (hht1-hhf1)Δ::hisG (hht2-hhf2)Δ::hisG GAL4-13×MYC::HIS3 pRS314[CEN TRP1 pADE3-HHT1(L130H)] pRS315[CEN LEU2 HHT1(K4R A110D)-HHF1]	This work
ZL35	YPH500 (hht1-hhf1)Δ::hisG (hht2-hhf2)Δ::hisG GAL4-13×MYC::HIS3 pRS314[CEN TRP1 pADE3-HHT1(K4R L130H)] pRS315[CEN LEU2 HHT1(K4R A110D)-HHF1]	This work
ZL36	YPH500 (hht1-hhf1)Δ::hisG (hht2-hhf2)Δ::hisG sir2Δ::HIS3 pRS314[CEN TRP1 pADE3-HHT1(L130H)] pRS315[CEN LEU2 HHT1(A110D)-HHF1]	This work
ZL37	YPH500 (hht1-hhf1)Δ::hisG (hht2-hhf2)Δ::hisG pRS313[CEN HIS3 HHT1(L130H)-HHF1] pRS314[CEN TRP1 HHT1(A110D)-HHF1]	This work
ZL38	YPH500 (hht1-hhf1)Δ::hisG (hht2-hhf2)Δ::hisG pRS314[CEN TRP1 1×MYC-HHT1-HHF1]	This work
