# Supplementary material for: Independent manipulation of histone H3 modifications in individual nucleosomes reveals the contributions of sister histones to transcription
Source: eLife. 2017 Oct 13;6:e30178. doi: 10.7554/eLife.30178 (PMC5677365; doi:10.7554/eLife.30178)
Supplement: Supplementary file 2. [file elife-30178-supp2.xlsx]

## Sheet: Sheet1
Antibody	Supplier	Catalog#	RRID
Histone H3 N-terminal	Active Motif	39763	AB_2650522
Histone H4	Active Motif	61521
H3K4ac	Active Motif	39382
H3K4me2	Active Motif	39142
H3K4me3	Active Motif	39160
H3K18ac	Active Motif	61104
H3K27ac	Active Motif	39136
H3K36me3	Active Motif	61021	AB_2614986
H3K79me2/3	Active Motif	61543
H2B	Active Motif	39237	AB_2631110
H4K16ac	Active Motif	39168	AB_2636968
Pan-acetylated H4 (H4ac)	Active Motif	61337
Myc	Sigma	11667149001
