# Supplementary material for: Independent manipulation of histone H3 modifications in individual nucleosomes reveals the contributions of sister histones to transcription
Source: eLife. 2017 Oct 13;6:e30178. doi: 10.7554/eLife.30178 (PMC5677365; doi:10.7554/eLife.30178)
Supplement: Supplementary file 3. [file elife-30178-supp3.xlsx]

## Sheet: Sheet1
Primer	Sequence 5'-3'	Purpose
ACT1 ORF	GAAAGTACTCCGTCTGGATTGG/CTTGTGGTGAACGATAGATGGA	RT-PCR&ChIP
GAL1 UAS	CGCTTAACTGCTCATTGCTATATTG/ACGCACGGAGGAGAGTCTTC	ChIP
GAL1 NUC B	GGCCCCACAAACCTTCAAAT/CCAGAAATAAGGCTAAAAAACTAATCG	ChIP
GAL1 5'ORF	AAACTTGCACCGGAAAGGTTTGCCAGT/CAGGGCCCATATTCGCTTTAACAACAGC	RT-PCR
GAL1 promoter probe	ATCCAGCACCACCTGTAACC/TGGGGCTCTTTACATTTCCA	Southern blot
FLO8 3'ORF	CAGCAGCCTTTGCTCAAGATG/CCGTCGACTGGGTTTTGG	ChIP
STE11 3'ORF	GCCATTCAGCAAGGCTAAGC/CACCGATATTATTTGATTCTGCACTT	ChIP
PCA1 3'ORF	CGTGTCCCTGCGTGATTG/AGCGACGCCACTTGCAA	ChIP
FLO8 probe	GACGCTCAGAAGCAAAGAAGTTCTAAGGTA/CTCAACACGTGACTTCAGCCTTCCCAATTA	Northern blot
STE11 probe	GAAGG GTTACATCATGAGAACATTGTTAC/GTGTGCATCCAGCCATGGATGCTGCAGCAA	Northern blot
PCA1 probe	GTCATAATTCTCAATCTTTGTTGCTTGGAT/CTAGCTTGGCAACCTCACTTCCCTCATTGA	Northern blot
SCR1 probe	AGGCTGTAATGGCTTTCTGGTGGGA/ATATGTGCTATCCCGGCCGCCTCCA	Northern blot
YLR359W 5'ORF	ACACTACGCCATTGTCTTCTAG/AGCCCAATTCCTTCTCAGCA	RT-PCR&ChIP
YMR315W 5'ORF	AAAGTCATTGCCGCCTTCAA/CCTGCTTTAACTGCCTTCTCG	RT-PCR&ChIP
YOR008C 5'ORF	ACCGAACAAAACAAGTCTGCT/TGTGAACTCGACTGCCAGTT	RT-PCR&ChIP
COS12 promoter	AATGCGCGCGTGTTTTG/TTCCTAAAACCATCATCTATCCATATTC	ChIP
COS12 ORF	TGGATGGAGCCAAATTTGAAA/TAGCGTGGAATTGTAGCAATCAAATA	RT-PCR
ERR1 promoter	CACAGATCGCCACAAGTTGAA/TTTGTTTGTGACCTCTCCCCTTA	ChIP
ERR1 ORF	TTGCCCCCGATATTGACACT/TGTTAATGGCTTCCACAATCATG	RT-PCR
ERR3 promoter	AATCGGCTCTTGTAGACAATGTCA/CCCTTATCCAGTTCATCGAAACTT	ChIP
ERR3 ORF	TGGTCTCTTCAGAGCGATCGT/AGTTCAACAGCTTCGTGAATGC	RT-PCR
