# Supplementary figures and images for: Independent manipulation of histone H3 modifications in individual nucleosomes reveals the contributions of sister histones to transcription
Source: eLife journal article supplement (doi:10.7554/elife.30178), 2017-10-13

Figure 2 – figure supplement 2.

A

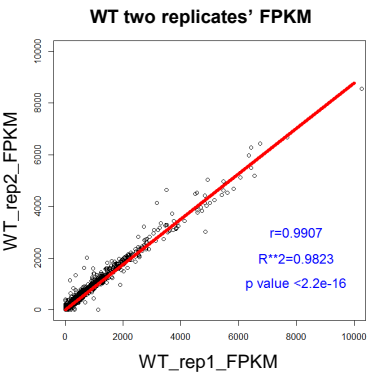

B

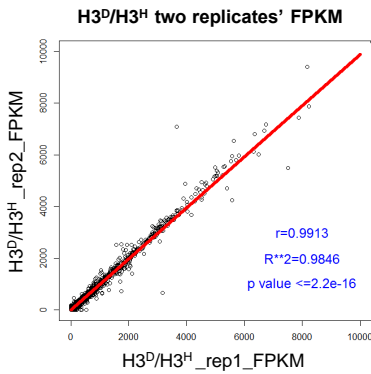

Supplement: supp [file elife-30178-supp-v1.zip]

Figure 8 – figure supplement 1.

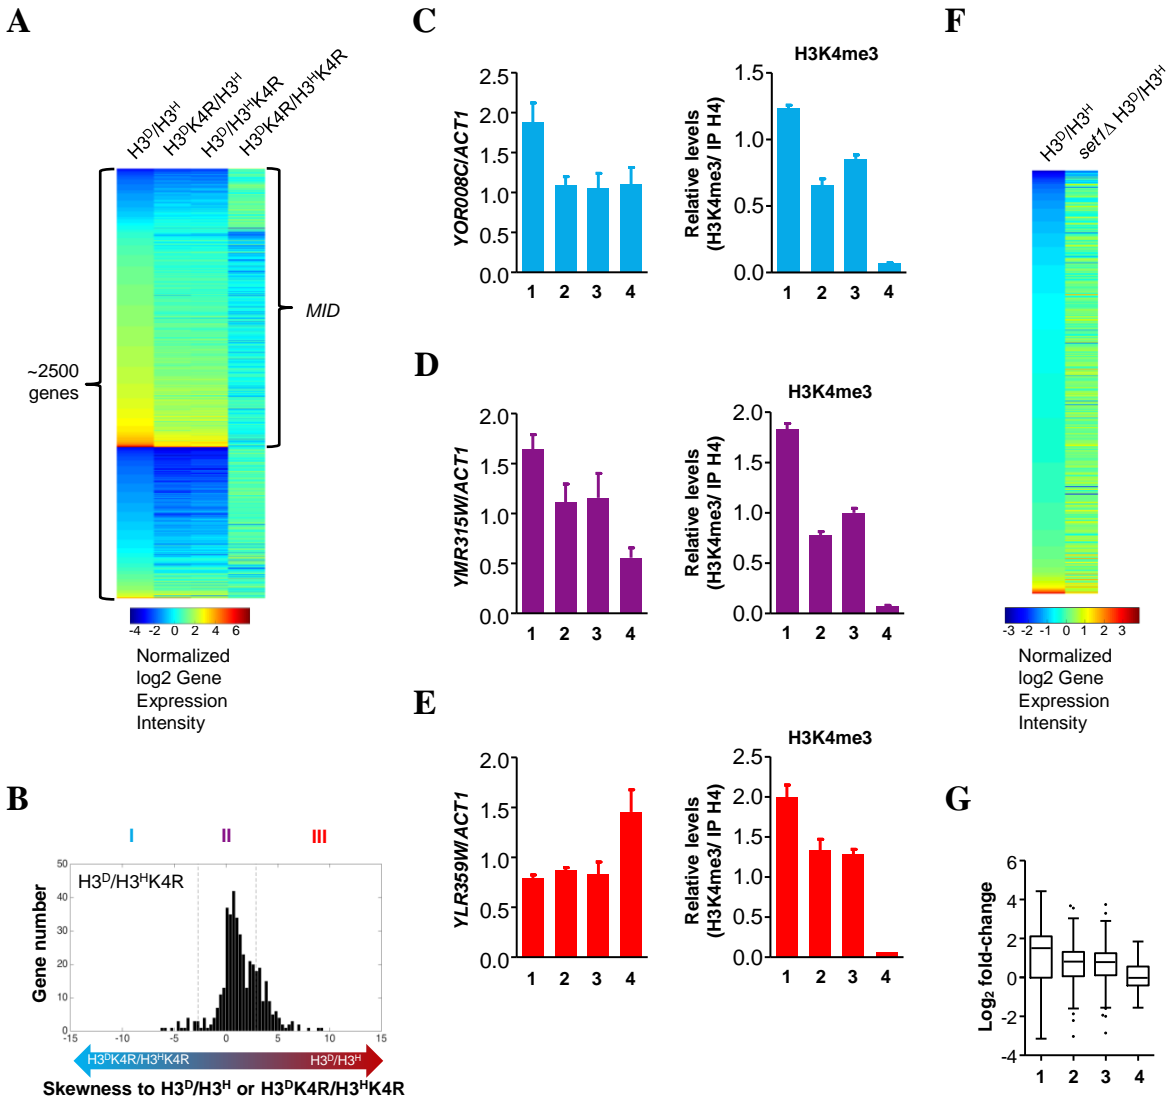

Supplement: supp [file elife-30178-supp-v1.zip]

Figure 2 – figure supplement 1.

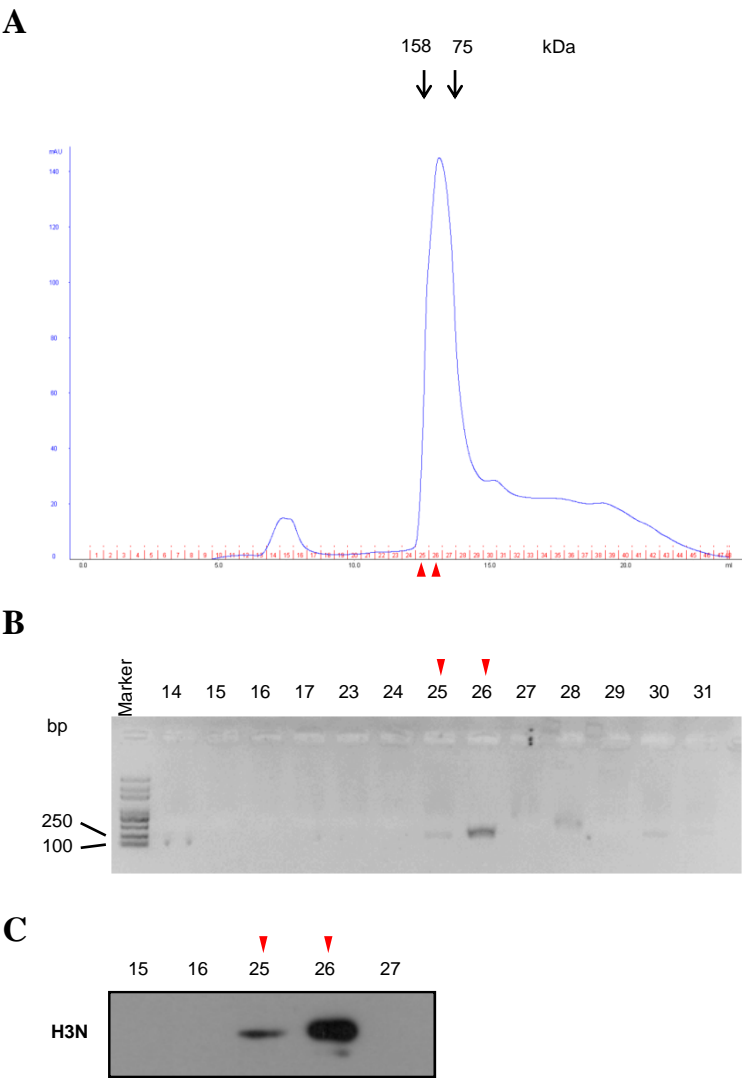

Supplement: supp [file elife-30178-supp-v1.zip]

Figure 1 – figure supplement 1.

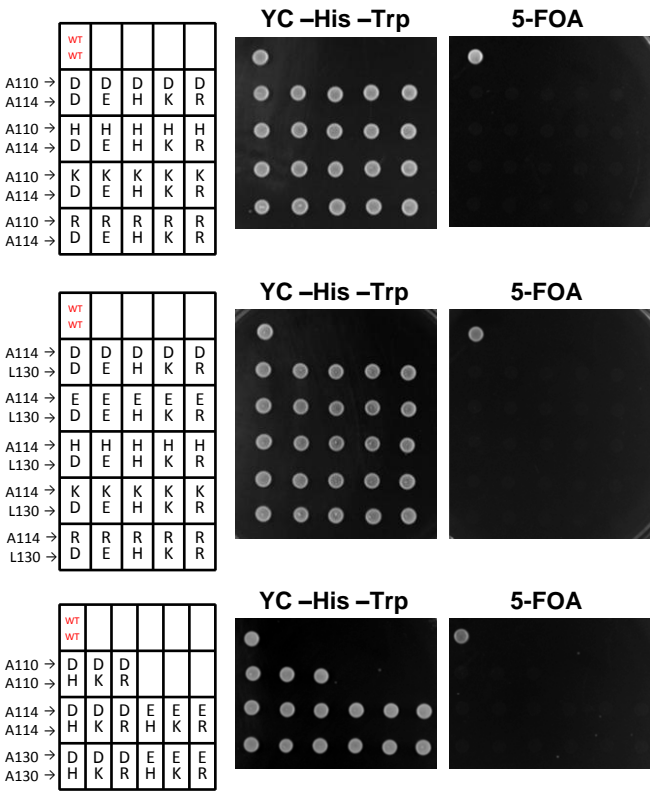

Supplement: supp [file elife-30178-supp-v1.zip]
